# Supplementary material
Source: publisher figshare collection journal article supplement (https://acs.figshare.com/ndownloader/files/5305120)
Supplement: Supplementary file 1 [file 5305120]

## Sheet: Cover Page
Supporting Information
Automated glycan sequencing from tandem mass spectra of N-linked glycopeptides
Chuan-Yih Yu1, Anoop Mayampurath2, Rui Zhu3, Lauren Zacharias3, Ehwang Song3, Lei Wang1, Yehia Mechref3, Haixu Tang1*
1School of Informatics and Computing, Indiana University, Bloomington, IN, USA
2Computation Institute, University of Chicago, Chicago, IL, USA,
3Department of Chemistry and Biochemistry, Texas Tech University, Lubbock, TX, USA
*Corresponding author: Haixu Tang (Email: hatang@indiana.edu)

## Sheet: 131_RefinedWithResult_2Labels
	Mannuel verification				GlycoSeq Result
Category	MSn_Scan	Y1	HexNAc-Hex-Fuc-NeuAc-NeuGc	peptide	MSn_Scan	Parent_Scan	Parent_Mz	Mono_Mz	Charge_State	Monoisotopic_Mass	CID_time	Y1	Peptide	Peptide_Mod	Identified_By_Mascot	Category	Category_Probability	Core_Score	Branch_Score	Append_Glycan_Score	MatchWithPrecursorMW	PPM	Full_Glycan(HexNac-Hex-deHex-NeuAC-NeuGc)	Append_Glycan(HexNac-Hex-deHex-NeuAC-NeuGc)	IUPAC
Sequence records with mannuel verification	360	681.119	2-6-0-0-0	NPNGTVTVISR	360	355	846.373	846.038	3	2535.09	15.3	681.119	NPNGTVTVISR	-	No	1	0.73	228.01	113.27	0	TRUE	3.08	2-6-0-0-0	0-1-0-0-0	Hex-Hex-Hex-(Hex-)Hex-HexNAc-HexNAc+HexNAc1	Hex-Hex-(Hex-Hex-)Hex-HexNAc-HexNAc+HexNAc1
	386	681.123	2-5-0-0-0	NPNGTVTVISR	386	377	792.355	792.021	3	2373.04	15.44	681.123	NPNGTVTVISR	-	No	1	0.72	258.07	29.71	0	TRUE	3.19	2-5-0-0-0	0-1-0-0-0	Hex-Hex-(Hex-)Hex-HexNAc-HexNAc+HexNAc1	Hex-(Hex-Hex-)Hex-HexNAc-HexNAc+HexNAc1
	389	1008.24	2-8-0-0-0	NETHSICTACDESCK	389	388	1172.44	1172.1	3	3513.28	15.46	1008.24	NETHSICTACDESCK	-	No	1	0.81	155.56	28.23	0	TRUE	3.06	2-8-0-0-0	0-1-0-0-0	Hex-Hex-Hex-Hex-Hex-(Hex-)Hex-HexNAc-HexNAc+HexNAc1	Hex-Hex-Hex-Hex-(Hex-Hex-)Hex-HexNAc-HexNAc+HexNAc1	Hex-Hex-Hex-(Hex-Hex-Hex-)Hex-HexNAc-HexNAc+HexNAc1
	397	906	2-7-0-0-0	NETHSICTACDESCK	397	388	1118.75	1118.09	3	3351.24	15.5	1008.22	NETHSICTACDESCK	-	No	1	0.71	140.87	22.66	-1	TRUE	4.3	2-7-0-0-0	0-1-0-0-0	Hex-Hex-Hex-Hex-(Hex-)Hex-HexNAc-HexNAc+HexNAc1	Hex-Hex-Hex-(Hex-Hex-)Hex-HexNAc-HexNAc+HexNAc1	Hex-Hex-(Hex-Hex-Hex-)Hex-HexNAc-HexNAc+HexNAc1
	424	1008.28	2-6-0-0-0	NETHSICTACDESCK	424	421	1064.73	1064.07	3	3189.17	15.65	1008.28	NETHSICTACDESCK	-	No	1	0.78	151.71	11.07	0	TRUE	2.14	2-6-0-0-0	0-1-0-0-0	Hex-Hex-Hex-(Hex-)Hex-HexNAc-HexNAc+HexNAc1	Hex-Hex-(Hex-Hex-)Hex-HexNAc-HexNAc+HexNAc1
	516	806.194	5-6-3-0-0	YNCTATNHIGTR	516	509	1278.86	1278.51	3	3832.51	16.24	806.194	YNCTATNHIGTR	-	No	1	0.76	14.17	207.34	-2	TRUE	3.5	5-6-3-0-0	1-1-0-0-0	Hex-(DeHex-)HexNAc-Hex-(Hex-(DeHex-HexNAc-)Hex-)Hex-HexNAc-(DeHex-)HexNAc+Hex1HexNAc1
	551	806.144	4-5-2-0-0	YNCTATNHIGTR	551	542	1108.45	1108.12	3	3321.34	16.46	806.144	YNCTATNHIGTR	-	No	1	0.85	13.9	145.94	0	TRUE	1.03	4-5-2-0-0	1-0-0-0-0	Hex-(DeHex-)HexNAc-(Hex-)Hex-(Hex-)Hex-HexNAc-(DeHex-)HexNAc+Hex1	Hex-(DeHex-)HexNAc-Hex-(Hex-Hex-)Hex-HexNAc-(DeHex-)HexNAc+Hex1
	560	806.238	2-8-0-0-0	YNCTATNHIGTR	560	553	1038.09	1037.41	3	3109.22	16.52	806.238	YNCTATNHIGTR	-	No	1	0.88	201.19	113.06	0	TRUE	0.31	2-8-0-0-0	0-1-0-0-0	Hex-Hex-Hex-Hex-Hex-(Hex-)Hex-HexNAc-HexNAc+HexNAc1	Hex-Hex-Hex-Hex-(Hex-Hex-)Hex-HexNAc-HexNAc+HexNAc1	Hex-Hex-Hex-(Hex-Hex-Hex-)Hex-HexNAc-HexNAc+HexNAc1
	567	806.216	2-6-0-0-0	YNCTATNHIGTR	567	564	929.716	929.381	3	2785.12	16.56	806.216	YNCTATNHIGTR	-	No	1	0.74	189.84	27.5	0	TRUE	2.37	2-6-0-0-0	0-1-0-0-0	Hex-Hex-Hex-(Hex-)Hex-HexNAc-HexNAc+HexNAc1	Hex-Hex-(Hex-Hex-)Hex-HexNAc-HexNAc+HexNAc1
	573	738.707	2-5-0-0-0	VVANGTGTQGQLK	573	564	1245.57	1245.06	2	2488.11	16.6	738.707	ALSPNSTISSAPK	-	No	1	0.75	92.61	16.56	0	TRUE	4.61	2-5-0-0-0	0-1-0-0-0	Hex-Hex-(Hex-)Hex-HexNAc-HexNAc+HexNAc1	Hex-(Hex-Hex-)Hex-HexNAc-HexNAc+HexNAc1
	576	785.638	4-5-2-0-0	VVNSTTGPGEHLR	576	575	1094.81	1094.48	3	3280.41	16.62	785.638	VVNSTTGPGEHLR	-	No	1	0.8	13.59	154.17	0	TRUE	1.64	4-5-2-0-0	1-0-0-0-0	Hex-(DeHex-)HexNAc-Hex-(Hex-Hex-)Hex-HexNAc-(DeHex-)HexNAc+Hex1	Hex-(DeHex-)HexNAc-(Hex-)Hex-(Hex-)Hex-HexNAc-(DeHex-)HexNAc+Hex1
	587	806.265	2-6-0-0-0	YNCTATNHIGTR	587	586	929.716	929.381	3	2785.12	16.68	806.265	YNCTATNHIGTR	-	No	1	0.77	184.94	25.05	0	TRUE	1.93	2-6-0-0-0	0-1-0-0-0	Hex-Hex-Hex-(Hex-)Hex-HexNAc-HexNAc+HexNAc1	Hex-Hex-(Hex-Hex-)Hex-HexNAc-HexNAc+HexNAc1
	600	785.667	6-3-2-0-0	VVNSTTGPGEHLR	600	597	1122.5	1121.83	3	3362.45	16.76	785.667	VVNSTTGPGEHLR	-	No	1	0.72	7.64	141.56	0	TRUE	0.87	6-3-2-0-0	1-0-0-0-0	HexNAc-(DeHex-HexNAc-)Hex-(HexNAc-Hex-)Hex-HexNAc-(DeHex-)HexNAc+Hex1	HexNAc-(HexNAc-)Hex-(DeHex-HexNAc-Hex-)Hex-HexNAc-(DeHex-)HexNAc+Hex1
	606	692.506	2-8-0-0-0	YEQLQNETR	606	597	1442.58	1442.07	2	2882.13	16.79	692.506	YEQLQNETR	-	No	1	0.71	38.59	23.58	0	TRUE	2.8	2-8-0-0-0	0-1-0-0-0	Hex-Hex-Hex-Hex-Hex-(Hex-)Hex-HexNAc-HexNAc+HexNAc1	Hex-Hex-Hex-Hex-(Hex-Hex-)Hex-HexNAc-HexNAc+HexNAc1	Hex-Hex-Hex-(Hex-Hex-Hex-)Hex-HexNAc-HexNAc+HexNAc1
	615	738.696	2-4-0-0-0	VVANGTGTQGQLK	615	608	1164.54	1164.04	2	2326.06	16.85	738.696	ALSPNSTISSAPK	-	No	0	0.61	144.93	0	0	TRUE	6.82	2-4-0-0-0	0-1-0-0-0	Hex-(Hex-)Hex-HexNAc-HexNAc+HexNAc1
	624	785.714	4-5-1-0-0	VVNSTTGPGEHLR	624	619	1046.13	1045.79	3	3134.35	16.9	785.714	VVNSTTGPGEHLR	-	No	1	0.74	10.81	208.84	0	TRUE	0.7	4-5-1-0-0	1-0-0-0-0	Hex-(DeHex-)HexNAc-Hex-(Hex-Hex-)Hex-HexNAc-HexNAc+Hex1	Hex-(DeHex-)HexNAc-(Hex-)Hex-(Hex-)Hex-HexNAc-HexNAc+Hex1
	637	806.245	2-4-0-0-0	YNCTATNHIGTR	637	630	821.679	821.345	3	2461.01	16.98	537.87	YNCTATNHIGTR	-	No	0	0.86	3.44	0	-3	TRUE	1.59	2-4-0-0-0	0-1-0-0-0	Hex-(Hex-)Hex-HexNAc-HexNAc+HexNAc1
	639	785.751	5-4-1-0-0	VVNSTTGPGEHLR	639	630	1060.13	1059.47	3	3175.38	16.99	785.751	VVNSTTGPGEHLR	-	No	1	0.92	18.43	157	0	TRUE	0.77	5-4-1-0-0	0-0-1-0-0	Hex-(HexNAc-)Hex-(HexNAc-(HexNAc-)Hex-)Hex-HexNAc-HexNAc+DeHex1	HexNAc-(HexNAc-)Hex-(Hex-(HexNAc-)Hex-)Hex-HexNAc-HexNAc+DeHex1	Hex-HexNAc-Hex-(HexNAc-(HexNAc-)Hex-)Hex-HexNAc-HexNAc+DeHex1	HexNAc-Hex-HexNAc-Hex-(HexNAc-Hex-)Hex-HexNAc-HexNAc+DeHex1	Hex-HexNAc-(HexNAc-)Hex-(HexNAc-Hex-)Hex-HexNAc-HexNAc+DeHex1	HexNAc-Hex-HexNAc-(HexNAc-)Hex-(Hex-)Hex-HexNAc-HexNAc+DeHex1	HexNAc-(Hex-)Hex-(HexNAc-(HexNAc-)Hex-)Hex-HexNAc-HexNAc+DeHex1
	646	692.515	2-7-0-0-0	YEQLQNETR	646	641	1361.55	1361.05	2	2720.09	17.03	692.515	YEQLQNETR	-	No	1	0.84	54.86	28.68	0	TRUE	0.36	2-7-0-0-0	0-1-0-0-0	Hex-Hex-Hex-Hex-(Hex-)Hex-HexNAc-HexNAc+HexNAc1	Hex-Hex-Hex-(Hex-Hex-)Hex-HexNAc-HexNAc+HexNAc1	Hex-Hex-(Hex-Hex-Hex-)Hex-HexNAc-HexNAc+HexNAc1
	668	692.604	2-6-0-0-0	YEQLQNETR	668	663	1280.53	1280.03	2	2558.04	17.16	692.604	YEQLQNETR	-	No	1	0.72	56.31	22.16	0	TRUE	2.1	2-6-0-0-0	0-1-0-0-0	Hex-Hex-Hex-(Hex-)Hex-HexNAc-HexNAc+HexNAc1	Hex-Hex-(Hex-Hex-)Hex-HexNAc-HexNAc+HexNAc1
	670	785.847	4-5-0-0-0	VVNSTTGPGEHLR	670	663	997.439	997.104	3	2988.29	17.17	785.847	VVNSTTGPGEHLR	-	No	1	0.74	11.64	144.1	0	TRUE	0.25	4-5-0-0-0	1-0-0-0-0	HexNAc-(Hex-Hex-)Hex-(Hex-)Hex-HexNAc-HexNAc+Hex1	HexNAc-(Hex-)Hex-(Hex-Hex-)Hex-HexNAc-HexNAc+Hex1	Hex-HexNAc-Hex-(Hex-Hex-)Hex-HexNAc-HexNAc+Hex1	HexNAc-Hex-(Hex-(Hex-)Hex-)Hex-HexNAc-HexNAc+Hex1	HexNAc-Hex-(Hex-Hex-Hex-)Hex-HexNAc-HexNAc+Hex1	Hex-HexNAc-(Hex-)Hex-(Hex-)Hex-HexNAc-HexNAc+Hex1
	692	672.583	2-8-0-0-0	NNHTASILDR	692	685	948.727	948.727	3	2843.16	17.29	591.273	LCLNNDTK	-	No	0	0.72	42.44	20.51	-3	TRUE	1.55	6-4-0-0-0	3-0-0-0-0	Hex-Hex-(HexNAc-Hex-)Hex-HexNAc-HexNAc+Hex3
	985	1044.35	2-8-0-0-0	GPNCSEPECPGNCHLR	985	982	1196.79	1196.12	3	3585.34	19.21	1044.35	GPNCSEPECPGNCHLR	-	No	1	0.84	188.77	79.66	0	TRUE	1.36	2-8-0-0-0	0-1-0-0-0	Hex-Hex-Hex-Hex-Hex-(Hex-)Hex-HexNAc-HexNAc+HexNAc1	Hex-Hex-Hex-Hex-(Hex-Hex-)Hex-HexNAc-HexNAc+HexNAc1	Hex-Hex-Hex-(Hex-Hex-Hex-)Hex-HexNAc-HexNAc+HexNAc1
	1049	1044.33	2-5-0-0-0	GPNCSEPECPGNCHLR	1049	1048	1035.07	1034.07	3	3099.18	19.61	696.614	GPNCSEPECPGNCHLR	-	No	1	0.74	199.01	80.78	0	TRUE	1.26	2-5-0-0-0	0-1-0-0-0	Hex-Hex-(Hex-)Hex-HexNAc-HexNAc+HexNAc1	Hex-(Hex-Hex-)Hex-HexNAc-HexNAc+HexNAc1
	1053	806.131	4-5-1-1-0	YNCTATNHIGTR	1053	1048	1156.47	1156.47	3	3466.39	19.64	806.131	YNCTATNHIGTR	-	No	1	0.8	13.48	104.93	-3	TRUE	4.37	4-5-1-1-0	1-1-1-0-0	NeuAc-Hex-HexNAc-Hex-(Hex-)Hex-HexNAc-HexNAc+Hex1HexNAc1DeHex1
	1071	859.288	2-8-0-0-0	AEPPLNASASDQGEK	1071	1070	1073.11	1072.77	3	3215.3	19.78	859.288	AEPPLNASASDQGEK	-	No	1	0.72	207.75	90.23	0	TRUE	2.2	2-8-0-0-0	0-1-0-0-0	Hex-Hex-Hex-Hex-Hex-(Hex-)Hex-HexNAc-HexNAc+HexNAc1	Hex-Hex-Hex-Hex-(Hex-Hex-)Hex-HexNAc-HexNAc+HexNAc1	Hex-Hex-Hex-(Hex-Hex-Hex-)Hex-HexNAc-HexNAc+HexNAc1
	1086	859.31	2-7-0-0-0	AEPPLNASASDQGEK	1086	1081	1019.42	1018.76	3	3053.26	19.86	859.31	AEPPLNASASDQGEK	-	No	1	0.72	188.83	39.8	0	TRUE	8.16	2-7-0-0-0	0-1-0-0-0	Hex-Hex-Hex-Hex-(Hex-)Hex-HexNAc-HexNAc+HexNAc1	Hex-Hex-Hex-(Hex-Hex-)Hex-HexNAc-HexNAc+HexNAc1	Hex-Hex-(Hex-Hex-Hex-)Hex-HexNAc-HexNAc+HexNAc1
	1106	859.293	2-6-0-0-0	AEPPLNASASDQGEK	1106	1103	1447.11	1446.61	2	2891.2	19.99	859.293	AEPPLNASASDQGEK	-	No	1	0.74	59.55	33.21	0	TRUE	3.72	2-6-0-0-0	0-1-0-0-0	Hex-Hex-Hex-(Hex-)Hex-HexNAc-HexNAc+HexNAc1	Hex-Hex-(Hex-Hex-)Hex-HexNAc-HexNAc+HexNAc1
	1324	859.195	2-6-0-0-0	AEPPLNASASDQGEK	1324	1323	965.074	964.739	3	2891.2	21.41	859.195	AEPPLNASASDQGEK	-	No	1	0.59	155.09	14.71	-2	TRUE	3.29	2-6-0-0-0	0-2-0-0-0	Hex-Hex-(Hex-)Hex-HexNAc-HexNAc+HexNAc2	Hex-(Hex-Hex-)Hex-HexNAc-HexNAc+HexNAc2
	1381	979.761	2-8-0-0-0	GNITEYQCHQYITK	1381	1378	1153.8	1153.13	3	3456.38	21.8	979.761	GNITEYQCHQYITK	-	No	1	0.81	162.01	60.57	0	TRUE	5.37	2-8-0-0-0	0-1-0-0-0	Hex-Hex-Hex-Hex-Hex-(Hex-)Hex-HexNAc-HexNAc+HexNAc1	Hex-Hex-Hex-Hex-(Hex-Hex-)Hex-HexNAc-HexNAc+HexNAc1	Hex-Hex-Hex-(Hex-Hex-Hex-)Hex-HexNAc-HexNAc+HexNAc1
	1403	1120.29	2-8-0-0-0	ENGTDTVQEEEESPAEGSK	1403	1400	1247.5	1246.82	3	3737.45	21.94	1120.29	ENGTDTVQEEEESPAEGSK	-	No	1	0.81	144.22	12.11	-2	TRUE	2.81	2-8-0-0-0	0-2-0-0-0	Hex-Hex-Hex-Hex-(Hex-)Hex-HexNAc-HexNAc+HexNAc2	Hex-Hex-Hex-(Hex-Hex-)Hex-HexNAc-HexNAc+HexNAc2	Hex-Hex-(Hex-Hex-Hex-)Hex-HexNAc-HexNAc+HexNAc2
	1442	1120.38	2-7-0-0-0	ENGTDTVQEEEESPAEGSK	1442	1433	1193.81	1192.8	3	3575.39	22.21	747.314	ENGTDTVQEEEESPAEGSK	-	No	1	0.74	33.51	67.31	0	TRUE	0.14	2-7-0-0-0	0-1-0-0-0	Hex-Hex-Hex-Hex-(Hex-)Hex-HexNAc-HexNAc+HexNAc1	Hex-Hex-Hex-(Hex-Hex-)Hex-HexNAc-HexNAc+HexNAc1	Hex-Hex-(Hex-Hex-Hex-)Hex-HexNAc-HexNAc+HexNAc1
	1467	1120.35	2-6-0-0-0	ENGTDTVQEEEESPAEGSK	1467	1466	1139.12	1138.79	3	3413.33	22.38	1120.35	ENGTDTVQEEEESPAEGSK	-	No	1	0.82	128.67	2.84	-1	TRUE	0.57	2-6-0-0-0	0-1-0-0-0	Hex-Hex-Hex-(Hex-)Hex-HexNAc-HexNAc+HexNAc1	Hex-Hex-(Hex-Hex-)Hex-HexNAc-HexNAc+HexNAc1
	1475	1120.25	2-6-0-0-0	ENGTDTVQEEEESPAEGSK	1475	1466	1708.17	1707.67	2	3413.32	22.42	1120.25	ENGTDTVQEEEESPAEGSK	-	No	1	0.72	239.38	41.33	0	TRUE	1.93	2-6-0-0-0	0-1-0-0-0	Hex-Hex-Hex-(Hex-)Hex-HexNAc-HexNAc+HexNAc1	Hex-Hex-(Hex-Hex-)Hex-HexNAc-HexNAc+HexNAc1
	1579	900.318	2-3-1-0-0	EAGNHTSGAGLVQINK	1579	1576	879.072	878.736	3	2633.18	23.11	900.318	EAGNHTSGAGLVQINK	-	No	1	0.72	179.01	0	-1	TRUE	1.11	2-3-1-0-0	0-0-1-0-0	Hex-(Hex-)Hex-HexNAc-HexNAc+DeHex1
	1636	918.34	2-3-1-0-0	DLGPTLANSTHHNVR	1636	1631	891.409	890.741	3	2669.2	23.49	918.34	DLGPTLANSTHHNVR	-	No	1	0.82	133.19	0	-1	TRUE	1.55	2-3-1-0-0	0-0-1-0-0	Hex-(Hex-)Hex-HexNAc-HexNAc+DeHex1
	1682	859.297	2-8-0-0-0	NITQIVGHSGCEAK	1682	1675	1073.12	1072.78	3	3215.32	23.76	859.297	NITQIVGHSGCEAK	-	No	1	0.83	172.79	39.14	0	TRUE	0.46	2-8-0-0-0	0-1-0-0-0	Hex-Hex-Hex-Hex-Hex-(Hex-)Hex-HexNAc-HexNAc+HexNAc1	Hex-Hex-Hex-Hex-(Hex-Hex-)Hex-HexNAc-HexNAc+HexNAc1	Hex-Hex-Hex-(Hex-Hex-Hex-)Hex-HexNAc-HexNAc+HexNAc1
	1739	1120.32	2-6-0-0-0	ENGTDTVQEEEESPAEGSK	1739	1730	1139.46	1138.78	3	3413.32	24.15	1120.32	ENGTDTVQEEEESPAEGSK	-	No	1	0.8	131.28	3.97	-1	TRUE	2.86	2-6-0-0-0	0-1-0-0-0	Hex-Hex-Hex-(Hex-)Hex-HexNAc-HexNAc+HexNAc1	Hex-Hex-(Hex-Hex-)Hex-HexNAc-HexNAc+HexNAc1
	1885	738.7	2-6-0-0-0	ALSPNSTISSAPK	1885	1884	884.727	884.392	3	2650.15	25.15	738.7	ALSPNSTISSAPK	-	No	1	0.77	260.78	58.53	-1	TRUE	0	2-6-0-0-0	0-1-0-0-0	Hex-Hex-Hex-(Hex-)Hex-HexNAc-HexNAc+HexNAc1	Hex-Hex-(Hex-Hex-)Hex-HexNAc-HexNAc+HexNAc1
	2074	567	2-8-0-0-0	NISQVLEK	2074	2071	1317.56	1317.06	2	2632.11	26.33	567.799	NISQVLEK	-	No	0	0.7	23.9	22.92	0	TRUE	2.88	2-8-0-0-0	0-1-0-0-0	Hex-Hex-Hex-Hex-Hex-(Hex-)Hex-HexNAc-HexNAc+HexNAc1	Hex-Hex-Hex-Hex-(Hex-Hex-)Hex-HexNAc-HexNAc+HexNAc1	Hex-Hex-Hex-(Hex-Hex-Hex-)Hex-HexNAc-HexNAc+HexNAc1
	2089	567	2-7-0-0-0	NISQVLEK	2089	2082	1236.54	1236.04	2	2470.06	26.42	1133.69	NISQVLEK	-	No	1	0.72	108.83	0.12	-3	TRUE	5.44	2-7-0-0-0	0-3-0-0-0	Hex-Hex-(Hex-)Hex-HexNAc-HexNAc+HexNAc3	Hex-(Hex-Hex-)Hex-HexNAc-HexNAc+HexNAc3
	2098	661.181	2-7-0-0-0	VQPFNVTQGK	2098	2093	1330.08	1329.57	2	2657.13	26.47	661.181	VQPFNVTQGK	-	No	1	0.74	162.83	101.8	0	TRUE	0.92	2-7-0-0-0	0-1-0-0-0	Hex-Hex-Hex-Hex-(Hex-)Hex-HexNAc-HexNAc+HexNAc1	Hex-Hex-Hex-(Hex-Hex-)Hex-HexNAc-HexNAc+HexNAc1	Hex-Hex-(Hex-Hex-Hex-)Hex-HexNAc-HexNAc+HexNAc1
	2100	661.083	2-8-0-0-0	VQPFNVTQGK	2100	2093	1411.61	1411.61	2	2821.2	26.49	1117.68	-	-	No	0	1	115	0	0	FALSE	-	2-3-0-0-0		Hex-(Hex-)Hex-HexNAc-HexNAc+Hex
	2105	661.157	2-7-0-0-0	VQPFNVTQGK	2105	2104	887.053	886.717	3	2657.13	26.52	661.157	VQPFNVTQGK	-	No	1	0.72	348.86	188.5	0	TRUE	1.75	2-7-0-0-0	0-1-0-0-0	Hex-Hex-Hex-Hex-(Hex-)Hex-HexNAc-HexNAc+HexNAc1	Hex-Hex-Hex-(Hex-Hex-)Hex-HexNAc-HexNAc+HexNAc1	Hex-Hex-(Hex-Hex-Hex-)Hex-HexNAc-HexNAc+HexNAc1
	2153	661.139	2-6-0-0-0	VQPFNVTQGK	2153	2148	1248.54	1248.54	2	2495.07	26.84	661.139	VQPFNVTQGK	-	No	1	0.74	70.12	32.99	0	TRUE	0.29	2-6-0-0-0	0-1-0-0-0	Hex-Hex-Hex-(Hex-)Hex-HexNAc-HexNAc+HexNAc1	Hex-Hex-(Hex-Hex-)Hex-HexNAc-HexNAc+HexNAc1
	2162	567.632	2-6-0-0-0	NISQVLEK	2162	2159	1155.51	1155.01	2	2308	26.9	1133.68	NISQVLEK	-	No	1	0.79	106.9	0.11	-2	TRUE	1.48	2-6-0-0-0	0-2-0-0-0	Hex-Hex-(Hex-)Hex-HexNAc-HexNAc+HexNAc2	Hex-(Hex-Hex-)Hex-HexNAc-HexNAc+HexNAc2
	2188	661.052	2-4-0-0-0	VQPFNVTQGK	2188	2181	1086.5	1086.5	2	2170.98	27.07	661.052	VQPFNVTQGK	-	No	1	0.74	148.23	0	0	TRUE	7.76	2-4-0-0-0	0-1-0-0-0	Hex-(Hex-)Hex-HexNAc-HexNAc+HexNAc1
	2226	661.174	2-5-0-0-0	VQPFNVTQGK	2226	2225	1168.02	1166.52	2	2331.02	27.31	661.174	-	-	No	0	1	136.88	48.2	0	FALSE	-	2-4-0-0-0		Hex-(Hex-Hex-)Hex-HexNAc-HexNAc+Hex	Hex-Hex-(Hex-)Hex-HexNAc-HexNAc+Hex
	2265	520.394	2-6-0-0-0	NTTIFLK	2265	2258	1108.49	1107.99	2	2213.96	27.56	520.781	NTTIFLK	-	No	0	0.68	31.96	14.06	0	TRUE	0.88	2-6-0-0-0	0-1-0-0-0	Hex-Hex-Hex-(Hex-)Hex-HexNAc-HexNAc+HexNAc1	Hex-Hex-(Hex-Hex-)Hex-HexNAc-HexNAc+HexNAc1
	2861	834.718	2-8-0-0-0	EASIVGENETYPR	2861	2852	1584.66	1584.14	2	3166.27	31.42	834.718	EASIVGENETYPR	-	No	1	0.62	25.31	12.69	0	TRUE	1.31	2-8-0-0-0	0-1-0-0-0	Hex-Hex-Hex-Hex-Hex-(Hex-)Hex-HexNAc-HexNAc+HexNAc1	Hex-Hex-Hex-Hex-(Hex-Hex-)Hex-HexNAc-HexNAc+HexNAc1	Hex-Hex-Hex-(Hex-Hex-Hex-)Hex-HexNAc-HexNAc+HexNAc1
	2941	961.832	2-9-0-0-0	INTTADEKDPTNPFR	2941	2940	1195.83	1195.16	3	3582.47	31.95	961.832	INTTADEKDPTNPFR	-	No	1	0.87	163.41	60.92	0	TRUE	0.89	2-9-0-0-0	0-1-0-0-0	Hex-Hex-Hex-Hex-Hex-Hex-(Hex-)Hex-HexNAc-HexNAc+HexNAc1	Hex-Hex-Hex-Hex-Hex-(Hex-Hex-)Hex-HexNAc-HexNAc+HexNAc1	Hex-Hex-Hex-Hex-(Hex-Hex-Hex-)Hex-HexNAc-HexNAc+HexNAc1	Hex-Hex-Hex-(Hex-Hex-Hex-Hex-)Hex-HexNAc-HexNAc+HexNAc1
	3172	699.146	2-9-0-0-0	VFGSQNLTTVK	3172	3171	1020.44	1020.11	3	3057.3	33.48	699.146	VFGSQNLTTVK	-	No	1	1	246.47	330.88	0	TRUE	3.59	2-9-0-0-0	0-1-0-0-0	Hex-Hex-Hex-Hex-Hex-Hex-(Hex-)Hex-HexNAc-HexNAc+HexNAc1	Hex-Hex-Hex-Hex-Hex-(Hex-Hex-)Hex-HexNAc-HexNAc+HexNAc1	Hex-Hex-Hex-Hex-(Hex-Hex-Hex-)Hex-HexNAc-HexNAc+HexNAc1	Hex-Hex-Hex-(Hex-Hex-Hex-Hex-)Hex-HexNAc-HexNAc+HexNAc1
	3176	699.154	2-9-0-0-0	VFGSQNLTTVK	3176	3171	1530.15	1529.65	2	3057.29	33.5	699.154	VFGSQNLTTVK	-	No	1	0.65	34.72	21.51	0	TRUE	3.11	2-9-0-0-0	0-1-0-0-0	Hex-Hex-Hex-Hex-Hex-Hex-(Hex-)Hex-HexNAc-HexNAc+HexNAc1	Hex-Hex-Hex-Hex-Hex-(Hex-Hex-)Hex-HexNAc-HexNAc+HexNAc1	Hex-Hex-Hex-Hex-(Hex-Hex-Hex-)Hex-HexNAc-HexNAc+HexNAc1	Hex-Hex-Hex-(Hex-Hex-Hex-Hex-)Hex-HexNAc-HexNAc+HexNAc1
	3183	669.521	2-9-0-0-0	IAPASNVSHTVVLRPLK	3183	3182	917.684	917.434	4	3665.71	33.55	669.521	IAPASNVSHTVVLRPLK	-	No	1	0.79	79.13	324.55	0	TRUE	2.66	2-9-0-0-0	0-1-0-0-0	Hex-Hex-Hex-Hex-Hex-Hex-(Hex-)Hex-HexNAc-HexNAc+HexNAc1	Hex-Hex-Hex-Hex-Hex-(Hex-Hex-)Hex-HexNAc-HexNAc+HexNAc1	Hex-Hex-Hex-Hex-(Hex-Hex-Hex-)Hex-HexNAc-HexNAc+HexNAc1	Hex-Hex-Hex-(Hex-Hex-Hex-Hex-)Hex-HexNAc-HexNAc+HexNAc1
	3189	699.1	2-8-0-0-0	VFGSQNLTTVK	3189	3182	1449.13	1448.62	2	2895.24	33.58	699.1	VFGSQNLTTVK	-	No	1	0.84	46.04	25.89	0	TRUE	1.35	2-8-0-0-0	0-1-0-0-0	Hex-Hex-Hex-Hex-Hex-(Hex-)Hex-HexNAc-HexNAc+HexNAc1	Hex-Hex-Hex-Hex-(Hex-Hex-)Hex-HexNAc-HexNAc+HexNAc1	Hex-Hex-Hex-(Hex-Hex-Hex-)Hex-HexNAc-HexNAc+HexNAc1
	3198	1003.51	2-9-0-0-0	IAPASNVSHTVVLRPLK	3198	3193	1223.58	1222.91	3	3665.72	33.64	1003.51	IAPASNVSHTVVLRPLK	-	No	1	0.87	177.54	112.13	0	TRUE	7.19	2-9-0-0-0	0-1-0-0-0	Hex-Hex-Hex-(Hex-Hex-Hex-Hex-)Hex-HexNAc-HexNAc+HexNAc1	Hex-Hex-Hex-Hex-Hex-(Hex-Hex-)Hex-HexNAc-HexNAc+HexNAc1	Hex-Hex-Hex-Hex-Hex-Hex-(Hex-)Hex-HexNAc-HexNAc+HexNAc1	Hex-Hex-Hex-Hex-(Hex-Hex-Hex-)Hex-HexNAc-HexNAc+HexNAc1
	3211	1003.47	2-6-0-0-0	IAPASNVSHTVVLRPLK	3211	3204	1061.19	1060.86	3	3179.56	33.72	1003.47	IAPASNVSHTVVLRPLK	-	No	0	0.71	27.52	2.8	-2	TRUE	6.14	2-6-0-0-0	0-2-0-0-0	Hex-Hex-(Hex-)Hex-HexNAc-HexNAc+HexNAc2	Hex-(Hex-Hex-)Hex-HexNAc-HexNAc+HexNAc2
	3213	1003.46	2-7-0-0-0	IAPASNVSHTVVLRPLK	3213	3204	1115.21	1114.87	3	3341.57	33.73	1003.46	IAPASNVSHTVVLRPLK	-	No	1	0.73	201.62	69.73	-1	TRUE	5.26	2-7-0-0-0	0-1-0-0-0	Hex-Hex-Hex-Hex-(Hex-)Hex-HexNAc-HexNAc+HexNAc1	Hex-Hex-Hex-(Hex-Hex-)Hex-HexNAc-HexNAc+HexNAc1	Hex-Hex-(Hex-Hex-Hex-)Hex-HexNAc-HexNAc+HexNAc1
	3218	1003.44	2-8-0-0-0	IAPASNVSHTVVLRPLK	3218	3215	1169.56	1168.89	3	3503.65	33.76	1003.44	IAPASNVSHTVVLRPLK	-	No	1	0.88	181.04	99.17	-1	TRUE	0.98	2-8-0-0-0	0-1-0-0-0	Hex-Hex-Hex-Hex-Hex-(Hex-)Hex-HexNAc-HexNAc+HexNAc1	Hex-Hex-Hex-Hex-(Hex-Hex-)Hex-HexNAc-HexNAc+HexNAc1	Hex-Hex-Hex-(Hex-Hex-Hex-)Hex-HexNAc-HexNAc+HexNAc1
	3220	947.418	2-8-0-0-0	LENITTGTYTIHAQK	3220	3215	1132.17	1131.5	3	3391.48	33.77	947.418	LENITTGTYTIHAQK	-	No	1	0.85	164.44	48.87	0	TRUE	4.54	2-8-0-0-0	0-1-0-0-0	Hex-Hex-Hex-Hex-Hex-(Hex-)Hex-HexNAc-HexNAc+HexNAc1	Hex-Hex-Hex-Hex-(Hex-Hex-)Hex-HexNAc-HexNAc+HexNAc1	Hex-Hex-Hex-(Hex-Hex-Hex-)Hex-HexNAc-HexNAc+HexNAc1
	3222	670	2-7-0-0-0	IAPASNVSHTVVLRPLK	3222	3215	836.908	836.41	4	3341.61	33.78	669.383	IAPASNVSHTVVLRPLK	-	No	1	0.74	82.73	173.49	0	TRUE	5.99	2-7-0-0-0	0-1-0-0-0	Hex-Hex-Hex-Hex-(Hex-)Hex-HexNAc-HexNAc+HexNAc1	Hex-Hex-Hex-(Hex-Hex-)Hex-HexNAc-HexNAc+HexNAc1	Hex-Hex-(Hex-Hex-Hex-)Hex-HexNAc-HexNAc+HexNAc1
	3235	699.134	2-7-0-0-0	VFGSQNLTTVK	3235	3226	1368.1	1367.6	2	2733.18	33.86	699.134	VFGSQNLTTVK	-	No	1	0.91	57.7	30.16	0	TRUE	0.36	2-7-0-0-0	0-1-0-0-0	Hex-Hex-Hex-Hex-(Hex-)Hex-HexNAc-HexNAc+HexNAc1	Hex-Hex-Hex-(Hex-Hex-)Hex-HexNAc-HexNAc+HexNAc1	Hex-Hex-(Hex-Hex-Hex-)Hex-HexNAc-HexNAc+HexNAc1
	3255	947.352	2-7-0-0-0	LENITTGTYTIHAQK	3255	3248	1078.14	1077.47	3	3229.4	33.98	947.352	LENITTGTYTIHAQK	-	No	1	0.72	196.47	32.2	0	TRUE	2.04	2-7-0-0-0	0-1-0-0-0	Hex-Hex-Hex-Hex-(Hex-)Hex-HexNAc-HexNAc+HexNAc1	Hex-Hex-Hex-(Hex-Hex-)Hex-HexNAc-HexNAc+HexNAc1	Hex-Hex-(Hex-Hex-Hex-)Hex-HexNAc-HexNAc+HexNAc1
	3273	699.174	2-6-0-0-0	VFGSQNLTTVK	3273	3270	1287.07	1286.57	2	2571.13	34.1	699.174	VFGSQNLTTVK	-	No	1	0.86	69.81	26.51	0	TRUE	1.52	2-6-0-0-0	0-1-0-0-0	Hex-Hex-Hex-(Hex-)Hex-HexNAc-HexNAc+HexNAc1	Hex-Hex-(Hex-Hex-)Hex-HexNAc-HexNAc+HexNAc1
	3282	947.333	2-6-0-0-0	LENITTGTYTIHAQK	3282	3281	1023.8	1023.46	3	3067.36	34.15	947.333	LENITTGTYTIHAQK	-	No	1	0.72	184.11	12.58	0	TRUE	1.99	2-6-0-0-0	0-1-0-0-0	Hex-Hex-Hex-(Hex-)Hex-HexNAc-HexNAc+HexNAc1	Hex-Hex-(Hex-Hex-)Hex-HexNAc-HexNAc+HexNAc1
	3297	699.146	2-4-0-0-0	VFGSQNLTTVK	3297	3292	1124.52	1124.52	2	2247.03	34.25	699.146	VFGSQNLTTVK	-	No	1	0.73	122.86	0	0	TRUE	2.72	2-4-0-0-0	0-1-0-0-0	Hex-(Hex-)Hex-HexNAc-HexNAc+HexNAc1
	3326	670	2-8-0-0-0	IAPASNVSHTVVLRPLK	3326	3325	877.423	876.923	4	3503.66	34.44	669.574	IAPASNVSHTVVLRPLK	-	No	1	0.84	95.09	254.54	0	TRUE	5.3	2-8-0-0-0	0-1-0-0-0	Hex-Hex-Hex-Hex-Hex-(Hex-)Hex-HexNAc-HexNAc+HexNAc1	Hex-Hex-Hex-Hex-(Hex-Hex-)Hex-HexNAc-HexNAc+HexNAc1	Hex-Hex-Hex-(Hex-Hex-Hex-)Hex-HexNAc-HexNAc+HexNAc1
	3348	947.378	2-5-0-0-0	LENITTGTYTIHAQK	3348	3347	969.776	969.442	3	2905.3	34.57	947.378	LENITTGTYTIHAQK	-	No	1	0.71	165.11	1.7	-1	TRUE	1.18	2-5-0-0-0	0-1-0-0-0	Hex-Hex-(Hex-)Hex-HexNAc-HexNAc+HexNAc1	Hex-(Hex-Hex-)Hex-HexNAc-HexNAc+HexNAc1
	3407	879	2-6-0-0-0	FTFTSHTPGEHQICLHSNSTK	3407	3402	953.41	952.662	4	3806.62	34.93	878.566	FTFTSHTPGEHQICLHSNSTK	-	No	1	0.73	229.32	102.14	0	TRUE	2.69	2-6-0-0-0	0-1-0-0-0	Hex-Hex-Hex-(Hex-)Hex-HexNAc-HexNAc+HexNAc1	Hex-Hex-(Hex-Hex-)Hex-HexNAc-HexNAc+HexNAc1
	3526	871.798	2-8-0-0-0	KQNNGAFNETLFR	3526	3523	1081.46	1081.13	3	3240.36	35.7	871.798	KQNNGAFNETLFR	-	No	1	0.78	191.23	72.31	0	TRUE	2.34	2-8-0-0-0	0-1-0-0-0	Hex-Hex-Hex-Hex-Hex-(Hex-)Hex-HexNAc-HexNAc+HexNAc1	Hex-Hex-Hex-Hex-(Hex-Hex-)Hex-HexNAc-HexNAc+HexNAc1	Hex-Hex-Hex-(Hex-Hex-Hex-)Hex-HexNAc-HexNAc+HexNAc1
	3552	682.11	2-7-0-0-0	GHTLTLNFTR	3552	3545	1351.09	1350.58	2	2699.14	35.88	682.11	GHTLTLNFTR	-	No	1	0.96	94.09	81.46	0	TRUE	1.09	2-7-0-0-0	0-1-0-0-0	Hex-Hex-Hex-Hex-(Hex-)Hex-HexNAc-HexNAc+HexNAc1	Hex-Hex-Hex-(Hex-Hex-)Hex-HexNAc-HexNAc+HexNAc1	Hex-Hex-(Hex-Hex-Hex-)Hex-HexNAc-HexNAc+HexNAc1
	3570	682.12	2-6-0-0-0	GHTLTLNFTR	3570	3567	847.042	846.71	3	2537.11	36	682.12	GHTLTLNFTR	-	No	1	0.73	223.35	73.12	0	TRUE	5.77	2-6-0-0-0	0-1-0-0-0	Hex-Hex-Hex-(Hex-)Hex-HexNAc-HexNAc+HexNAc1	Hex-Hex-(Hex-Hex-)Hex-HexNAc-HexNAc+HexNAc1
	3625	682.078	2-6-0-0-0	GHTLTLNFTR	3625	3622	1269.56	1269.56	2	2537.11	36.38	682.078	GHTLTLNFTR	-	No	1	0.87	77.54	49.4	0	TRUE	3.95	2-6-0-0-0	0-1-0-0-0	Hex-Hex-Hex-(Hex-)Hex-HexNAc-HexNAc+HexNAc1	Hex-Hex-(Hex-Hex-)Hex-HexNAc-HexNAc+HexNAc1
	3649	682.211	2-7-0-0-0	GHTLTLNFTR	3649	3644	901.393	900.722	3	2699.14	36.54	682.211	GHTLTLNFTR	-	No	1	0.73	281.5	124.25	0	TRUE	1.54	2-7-0-0-0	0-1-0-0-0	Hex-Hex-Hex-Hex-(Hex-)Hex-HexNAc-HexNAc+HexNAc1	Hex-Hex-Hex-(Hex-Hex-)Hex-HexNAc-HexNAc+HexNAc1	Hex-Hex-(Hex-Hex-Hex-)Hex-HexNAc-HexNAc+HexNAc1
	3675	682.106	2-5-0-0-0	GHTLTLNFTR	3675	3666	1189.03	1188.53	2	2375.04	36.73	682.106	GHTLTLNFTR	-	No	1	0.9	143.59	61.33	0	TRUE	0.62	2-5-0-0-0	0-1-0-0-0	Hex-Hex-(Hex-)Hex-HexNAc-HexNAc+HexNAc1	Hex-(Hex-Hex-)Hex-HexNAc-HexNAc+HexNAc1
	3715	682.188	2-5-0-0-0	GHTLTLNFTR	3715	3710	793.024	792.69	3	2375.05	36.98	682.188	GHTLTLNFTR	-	No	1	0.72	191.72	13.82	0	TRUE	2.26	2-5-0-0-0	0-1-0-0-0	Hex-Hex-(Hex-)Hex-HexNAc-HexNAc+HexNAc1	Hex-(Hex-Hex-)Hex-HexNAc-HexNAc+HexNAc1
	3722	670.607	2-8-0-0-0	ENVGIYNLSK	3722	3721	1420.6	1420.1	2	2838.18	37.02	670.607	ENVGIYNLSK	-	No	1	0.86	27.45	117.73	0	TRUE	0.86	2-8-0-0-0	0-1-0-0-0	Hex-Hex-Hex-Hex-Hex-(Hex-)Hex-HexNAc-HexNAc+HexNAc1	Hex-Hex-Hex-Hex-(Hex-Hex-)Hex-HexNAc-HexNAc+HexNAc1	Hex-Hex-Hex-(Hex-Hex-Hex-)Hex-HexNAc-HexNAc+HexNAc1
	3761	670.736	2-7-0-0-0	ENVGIYNLSK	3761	3754	1339.57	1339.07	2	2676.12	37.27	670.736	ENVGIYNLSK	-	No	1	0.74	141.59	56.21	0	TRUE	0.73	2-7-0-0-0	0-1-0-0-0	Hex-Hex-Hex-Hex-(Hex-)Hex-HexNAc-HexNAc+HexNAc1	Hex-Hex-Hex-(Hex-Hex-)Hex-HexNAc-HexNAc+HexNAc1	Hex-Hex-(Hex-Hex-Hex-)Hex-HexNAc-HexNAc+HexNAc1
	3803	670.805	2-6-0-0-0	ENVGIYNLSK	3803	3798	1258.54	1258.04	2	2514.07	37.54	1339.82	ENVGIYNLSK	-	No	1	0.76	103.44	0	-3	TRUE	1.26	2-6-0-0-0	0-3-0-0-0	Hex-(Hex-)Hex-HexNAc-HexNAc+HexNAc3
	4234	880.812	2-8-0-0-0	NHSIFLADINQER	4234	4227	1087.46	1087.13	3	3258.36	40.41	880.812	NHSIFLADINQER	-	No	1	0.77	193	56.04	0	TRUE	0.97	2-8-0-0-0	0-1-0-0-0	Hex-Hex-Hex-Hex-Hex-(Hex-)Hex-HexNAc-HexNAc+HexNAc1	Hex-Hex-Hex-Hex-(Hex-Hex-)Hex-HexNAc-HexNAc+HexNAc1	Hex-Hex-Hex-(Hex-Hex-Hex-)Hex-HexNAc-HexNAc+HexNAc1
	4245	657.122	2-5-0-0-0	GSLSYLNVTR	4245	4238	1163.52	1163.52	2	2325.02	40.47	1312.76	GSLSYLNVTR	-	No	1	0.76	102.14	0	-2	TRUE	0.84	2-5-0-0-0	0-2-0-0-0	Hex-(Hex-)Hex-HexNAc-HexNAc+HexNAc2
	4250	657.058	2-6-0-0-0	GSLSYLNVTR	4250	4249	1245.05	1244.54	2	2487.07	40.51	1312.81	GSLSYLNVTR	-	No	1	0.72	103.09	0	-3	TRUE	2.85	2-6-0-0-0	0-3-0-0-0	Hex-(Hex-)Hex-HexNAc-HexNAc+HexNAc3
	4294	880.826	2-6-0-0-0	NHSIFLADINQER	4294	4293	979.427	979.091	3	2934.25	40.79	880.826	NHSIFLADINQER	-	No	1	0.74	148.32	18.6	0	TRUE	1	2-6-0-0-0	0-1-0-0-0	Hex-Hex-Hex-(Hex-)Hex-HexNAc-HexNAc+HexNAc1	Hex-Hex-(Hex-Hex-)Hex-HexNAc-HexNAc+HexNAc1
	4382	880.87	2-5-0-0-0	NHSIFLADINQER	4382	4381	925.41	925.077	3	2772.21	41.37	880.87	NHSIFLADINQER	-	No	1	0.71	164.31	2.09	0	FALSE	2.64	2-5-0-0-0	0-1-0-0-0	Hex-(Hex-Hex-)Hex-HexNAc-HexNAc+HexNAc1	Hex-Hex-(Hex-)Hex-HexNAc-HexNAc+HexNAc1
	4399	657.091	2-3-0-0-0	GSLSYLNVTR	4399	4392	1001.47	1001.47	2	2000.93	41.49	1129.85	-	-	No	0	1	110.38	0	0	FALSE	-	2-3-0-0-0		Hex-(Hex-)Hex-HexNAc-HexNAc+Hex
	4522	1051.44	2-8-0-0-0	TILVDNNTWNNTHISR	4522	4513	1201.51	1200.85	3	3599.51	42.28	1051.44	TILVDNNTWNNTHISR	-	No	1	0.78	160.71	42.01	0	TRUE	5.22	2-8-0-0-0	0-1-0-0-0	Hex-Hex-Hex-Hex-Hex-(Hex-)Hex-HexNAc-HexNAc+HexNAc1	Hex-Hex-Hex-Hex-(Hex-Hex-)Hex-HexNAc-HexNAc+HexNAc1	Hex-Hex-Hex-(Hex-Hex-Hex-)Hex-HexNAc-HexNAc+HexNAc1
	4569	1051.39	2-9-0-0-0	TILVDNNTWNNTHISR	4569	4568	1255.19	1254.85	3	3761.53	42.59	822.356	GHCWGPGPTQCVNCSQFLR	-	No	0	0.94	10.35	0	-3	TRUE	1.17	5-3-0-0-0	3-0-0-0-0	Hex-(Hex-)Hex-HexNAc-HexNAc+Hex3
	5143	814.209	2-8-0-0-0	AGPNGTLFVADAYK	5143	5140	1043.11	1042.78	3	3125.31	46.27	814.209	AGPNGTLFVADAYK	-	No	1	0.97	186.13	136.49	0	TRUE	1.87	2-8-0-0-0	0-1-0-0-0	Hex-Hex-Hex-Hex-Hex-(Hex-)Hex-HexNAc-HexNAc+HexNAc1	Hex-Hex-Hex-Hex-(Hex-Hex-)Hex-HexNAc-HexNAc+HexNAc1	Hex-Hex-Hex-(Hex-Hex-Hex-)Hex-HexNAc-HexNAc+HexNAc1
	5193	813.854	2-6-0-0-0	AGPNGTLFVADAYK	5193	5184	1402.1	1401.61	2	2801.2	46.59	813.854	AGPNGTLFVADAYK	-	No	1	0.86	69.6	44.15	0	TRUE	3.31	2-6-0-0-0	0-1-0-0-0	Hex-Hex-Hex-(Hex-)Hex-HexNAc-HexNAc+HexNAc1	Hex-Hex-(Hex-Hex-)Hex-HexNAc-HexNAc+HexNAc1
	5200	814.285	2-6-0-0-0	AGPNGTLFVADAYK	5200	5195	935.077	934.407	3	2800.2	46.63	814.285	-	-	No	0	1	209.64	32.27	0	FALSE	-	3-4-0-0-0		Hex-Hex-(HexNAc-Hex-)Hex-HexNAc-HexNAc+Hex
	5215	835.774	2-6-0-0-0	LHVTLYNCSFGR	5215	5206	949.742	949.074	3	2844.2	46.72	835.774	LHVTLYNCSFGR	-	No	1	0.74	226.65	46.56	0	TRUE	3.18	2-6-0-0-0	0-1-0-0-0	Hex-Hex-Hex-(Hex-)Hex-HexNAc-HexNAc+HexNAc1	Hex-Hex-(Hex-Hex-)Hex-HexNAc-HexNAc+HexNAc1
	5237	675.577	2-8-0-0-0	VINETWAWK	5237	5228	1425.6	1425.09	2	2848.17	46.85	675.577	VINETWAWK	-	No	1	0.69	48.19	24.59	0	TRUE	1.03	2-8-0-0-0	0-1-0-0-0	Hex-Hex-Hex-Hex-Hex-(Hex-)Hex-HexNAc-HexNAc+HexNAc1	Hex-Hex-Hex-Hex-(Hex-Hex-)Hex-HexNAc-HexNAc+HexNAc1	Hex-Hex-Hex-(Hex-Hex-Hex-)Hex-HexNAc-HexNAc+HexNAc1
	5255	835.757	2-5-0-0-0	LHVTLYNCSFGR	5255	5250	895.387	895.056	3	2682.14	46.96	835.757	LHVTLYNCSFGR	-	No	1	0.72	167.96	7.57	0	TRUE	2.37	2-5-0-0-0	0-1-0-0-0	Hex-Hex-(Hex-)Hex-HexNAc-HexNAc+HexNAc1	Hex-(Hex-Hex-)Hex-HexNAc-HexNAc+HexNAc1
	5266	813.91	2-5-0-0-0	AGPNGTLFVADAYK	5266	5261	1321.08	1320.58	2	2639.15	47.03	813.91	AGPNGTLFVADAYK	-	No	1	0.73	89.66	26.38	0	TRUE	3.7	2-5-0-0-0	0-1-0-0-0	Hex-Hex-(Hex-)Hex-HexNAc-HexNAc+HexNAc1	Hex-(Hex-Hex-)Hex-HexNAc-HexNAc+HexNAc1
	5273	675.638	2-7-0-0-0	VINETWAWK	5273	5272	1344.57	1344.07	2	2686.12	47.07	675.638	VINETWAWK	-	No	1	0.83	109.2	46.99	0	TRUE	1.45	2-7-0-0-0	0-1-0-0-0	Hex-Hex-Hex-Hex-(Hex-)Hex-HexNAc-HexNAc+HexNAc1	Hex-Hex-Hex-(Hex-Hex-)Hex-HexNAc-HexNAc+HexNAc1	Hex-Hex-(Hex-Hex-Hex-)Hex-HexNAc-HexNAc+HexNAc1
	5277	814.278	2-5-0-0-0	AGPNGTLFVADAYK	5277	5272	881.389	880.725	3	2639.15	47.1	543.268	AGPNGTLFVADAYK	-	No	0	0.8	71.84	11.32	0	TRUE	3.7	2-5-0-0-0	0-1-0-0-0	Hex-Hex-(Hex-)Hex-HexNAc-HexNAc+HexNAc1	Hex-(Hex-Hex-)Hex-HexNAc-HexNAc+HexNAc1
	5279	814.64	4-3-1-0-0	AGPNGTLFVADAYK	5279	5272	1435.14	1434.64	2	2867.27	47.11	813.886	AGPNGTLFVADAYK	-	No	1	0.74	169.82	60.81	0	TRUE	5.53	4-3-1-0-0	0-0-1-0-0	HexNAc-(HexNAc-)Hex-(Hex-)Hex-HexNAc-HexNAc+DeHex1	HexNAc-Hex-(HexNAc-Hex-)Hex-HexNAc-HexNAc+DeHex1
	5345	1095.93	2-8-0-0-0	ILLTCSLNDSATEVTGHR	5345	5338	1231.2	1230.88	3	3689.6	47.52	1095.93	-	-	No	1	0.71	133.33	32.14	-1	TRUE	-	2-8-0-0-0	0-1-0-0-0	Hex-Hex-Hex-Hex-Hex-(Hex-)Hex-HexNAc-HexNAc+HexNAc1	Hex-Hex-Hex-Hex-(Hex-Hex-)Hex-HexNAc-HexNAc+HexNAc1	Hex-Hex-Hex-(Hex-Hex-Hex-)Hex-HexNAc-HexNAc+HexNAc1
	5407	1095.94	2-6-0-0-0	ILLTCSLNDSATEVTGHR	5407	5404	1123.17	1122.51	3	3364.49	47.91	1074.89	ELGPLYTNITADIGTDPR	-	No	0	0.81	6.08	12.75	0	TRUE	1.89	3-5-0-0-0	0-1-0-0-0	HexNAc-(Hex-)Hex-(Hex-)Hex-HexNAc-HexNAc+HexNAc1	Hex-HexNAc-Hex-(Hex-)Hex-HexNAc-HexNAc+HexNAc1	HexNAc-Hex-(Hex-Hex-)Hex-HexNAc-HexNAc+HexNAc1
	5583	1079.35	2-6-0-0-0	YQTLNCSVNVNCVNIR	5583	5580	1111.81	1111.81	3	3332.41	49.04	530.947	EVNDTLLVNELK	-	No	0	0.83	1.51	107.82	-3	TRUE	8.64	4-7-0-0-0	0-3-0-0-0	HexNAc-Hex-(Hex-HexNAc-Hex-)Hex-HexNAc-HexNAc+HexNAc3	HexNAc-Hex-(HexNAc-(Hex-)Hex-)Hex-HexNAc-HexNAc+HexNAc3	HexNAc-(Hex-HexNAc-)Hex-(Hex-)Hex-HexNAc-HexNAc+HexNAc3
	5693	891.975	2-6-0-0-0	VVRPDSELGERPPEDNQSFQYDHEAFLGK	5693	5690	948.826	948.418	5	4737.06	49.75	891.15	VVRPDSELGERPPEDNQSFQYDHEAFLGK	-	No	0	0.59	19.41	0.85	0	TRUE	4.33	2-6-0-0-0	0-1-0-0-0	Hex-Hex-Hex-(Hex-)Hex-HexNAc-HexNAc+HexNAc1	Hex-Hex-(Hex-Hex-)Hex-HexNAc-HexNAc+HexNAc1
	5790	892.09	2-5-0-0-0	VVRPDSELGERPPEDNQSFQYDHEAFLGK	5790	5789	916.413	916.213	5	4576.03	50.38	577.28	GTEVNTTVIGENDPIDEVQGFLFGK	-	No	0	0.95	0.6	4.96	0	TRUE	6.4	4-4-1-1-0	0-0-0-1-0	Hex-HexNAc-(HexNAc-)Hex-(Hex-)Hex-HexNAc-(DeHex-)HexNAc+NeuAc1	HexNAc-(Hex-HexNAc-)Hex-(Hex-)Hex-HexNAc-(DeHex-)HexNAc+NeuAc1	HexNAc-(Hex-)Hex-(HexNAc-Hex-)Hex-HexNAc-(DeHex-)HexNAc+NeuAc1	Hex-HexNAc-Hex-(HexNAc-Hex-)Hex-HexNAc-(DeHex-)HexNAc+NeuAc1	HexNAc-Hex-(HexNAc-(Hex-)Hex-)Hex-HexNAc-(DeHex-)HexNAc+NeuAc1	HexNAc-Hex-(Hex-HexNAc-Hex-)Hex-HexNAc-(DeHex-)HexNAc+NeuAc1	HexNAc-(HexNAc-)Hex-(Hex-Hex-)Hex-HexNAc-(DeHex-)HexNAc+NeuAc1
	5864	1150.96	2-9-0-0-0	TTLVDNNTWNNSHIALVGK	5864	5855	1321.91	1321.23	3	3960.68	50.87	1150.96	TTLVDNNTWNNSHIALVGK	-	No	1	0.82	132.46	23.45	0	TRUE	6.9	2-9-0-0-0	0-1-0-0-0	Hex-Hex-Hex-Hex-Hex-Hex-(Hex-)Hex-HexNAc-HexNAc+HexNAc1	Hex-Hex-Hex-Hex-Hex-(Hex-Hex-)Hex-HexNAc-HexNAc+HexNAc1	Hex-Hex-Hex-Hex-(Hex-Hex-Hex-)Hex-HexNAc-HexNAc+HexNAc1	Hex-Hex-Hex-(Hex-Hex-Hex-Hex-)Hex-HexNAc-HexNAc+HexNAc1
	5889	1151	2-8-0-0-0	TTLVDNNTWNNSHIALVGK	5889	5888	1267.9	1267.23	3	3798.66	51.02	1151	TTLVDNNTWNNSHIALVGK	-	No	1	0.86	136.27	21.39	0	TRUE	1.03	2-8-0-0-0	0-1-0-0-0	Hex-Hex-Hex-Hex-Hex-(Hex-)Hex-HexNAc-HexNAc+HexNAc1	Hex-Hex-Hex-Hex-(Hex-Hex-)Hex-HexNAc-HexNAc+HexNAc1	Hex-Hex-Hex-(Hex-Hex-Hex-)Hex-HexNAc-HexNAc+HexNAc1
	5933	1127.95	2-3-1-0-0	FLSSSPHLPPSSYFNASGR	5933	5932	1031.13	1030.47	3	3088.39	51.3	1127.95	FLSSSPHLPPSSYFNASGR	-	No	1	0.75	137.27	0	-1	TRUE	4.11	2-3-1-0-0	0-0-1-0-0	Hex-(Hex-)Hex-HexNAc-HexNAc+DeHex1
	5937	889.37	2-6-0-0-0	GVFITNETGQPLIGK	5937	5932	985.12	984.785	3	2951.33	51.33	889.37	GVFITNETGQPLIGK	-	No	1	0.79	176.08	17.5	-1	TRUE	1.24	2-6-0-0-0	0-1-0-0-0	Hex-Hex-Hex-(Hex-)Hex-HexNAc-HexNAc+HexNAc1	Hex-Hex-(Hex-Hex-)Hex-HexNAc-HexNAc+HexNAc1
	5979	889.341	2-6-0-0-0	GVFITNETGQPLIGK	5979	5976	1477.18	1476.68	2	2951.34	51.6	889.341	GVFITNETGQPLIGK	-	No	1	0.84	50.86	15.51	0	TRUE	2.65	2-6-0-0-0	0-1-0-0-0	Hex-Hex-Hex-(Hex-)Hex-HexNAc-HexNAc+HexNAc1	Hex-Hex-(Hex-Hex-)Hex-HexNAc-HexNAc+HexNAc1
	6003	889.34	2-5-0-0-0	GVFITNETGQPLIGK	6003	5998	1396.15	1395.65	2	2789.29	51.76	889.34	GVFITNETGQPLIGK	-	No	1	0.52	55.04	7.58	0	TRUE	5.69	2-5-0-0-0	0-1-0-0-0	Hex-Hex-(Hex-)Hex-HexNAc-HexNAc+HexNAc1	Hex-(Hex-Hex-)Hex-HexNAc-HexNAc+HexNAc1
	6166	1127.98	2-3-1-0-0	FLSSSPHLPPSSYFNASGR	6166	6163	1030.8	1030.46	3	3088.36	52.84	1127.98	FLSSSPHLPPSSYFNASGR	-	No	1	0.75	134.35	0	0	FALSE	2.45	2-3-1-0-0	0-0-1-0-0	Hex-(Hex-)Hex-HexNAc-HexNAc+DeHex1
	6278	1144.01	2-8-0-0-0	TNITLVCKPGDLESAPVLR	6278	6273	1263.57	1262.57	3	3784.69	53.59	1144.01	TNITLVCKPGDLESAPVLR	-	No	1	0.8	154.1	13.77	0	FALSE	4.9	2-8-0-0-0	0-1-0-0-0	Hex-Hex-Hex-(Hex-Hex-Hex-)Hex-HexNAc-HexNAc+HexNAc1	Hex-Hex-Hex-Hex-Hex-(Hex-)Hex-HexNAc-HexNAc+HexNAc1	Hex-Hex-Hex-Hex-(Hex-Hex-)Hex-HexNAc-HexNAc+HexNAc1
	6344	1143.88	2-6-0-0-0	TNITLVCKPGDLESAPVLR	6344	6339	1154.87	1154.54	3	3460.59	54.04	1143.88	TNITLVCKPGDLESAPVLR	-	No	1	0.74	152.75	7.66	-1	TRUE	2.12	2-6-0-0-0	0-1-0-0-0	Hex-Hex-Hex-(Hex-)Hex-HexNAc-HexNAc+HexNAc1	Hex-Hex-(Hex-Hex-)Hex-HexNAc-HexNAc+HexNAc1
	6465	789.737	2-6-0-0-0	LVQLFPNDTSLK	6465	6460	918.754	918.421	3	2752.24	54.84	789.737	LVQLFPNDTSLK	-	No	1	0.85	267.66	43.67	0	TRUE	1.77	2-6-0-0-0	0-1-0-0-0	Hex-Hex-Hex-(Hex-)Hex-HexNAc-HexNAc+HexNAc1	Hex-Hex-(Hex-Hex-)Hex-HexNAc-HexNAc+HexNAc1
	6472	789.779	2-7-0-0-0	LVQLFPNDTSLK	6472	6471	972.429	972.429	3	2914.26	54.88	789.779	LVQLFPNDTSLK	-	No	1	0.9	109.03	53.09	0	TRUE	8.71	2-7-0-0-0	0-1-0-0-0	Hex-Hex-Hex-Hex-(Hex-)Hex-HexNAc-HexNAc+HexNAc1	Hex-Hex-Hex-(Hex-Hex-)Hex-HexNAc-HexNAc+HexNAc1	Hex-Hex-(Hex-Hex-Hex-)Hex-HexNAc-HexNAc+HexNAc1
	6564	789.798	2-5-0-0-0	LVQLFPNDTSLK	6564	6559	1297.37	1297.11	4	5184.42	55.54	1152.46	-	-	No	0	1	105.73	0	0	FALSE	-	2-3-0-0-0		Hex-(Hex-)Hex-HexNAc-HexNAc+Hex
	6612	995.34	2-7-0-0-0	EEEAIQLDGLNASQIR	6612	6603	1110.15	1109.48	3	3325.42	55.86	995.34	EEEAIQLDGLNASQIR	-	No	1	0.8	148.83	10.62	-2	TRUE	1.39	2-7-0-0-0	0-2-0-0-0	Hex-Hex-Hex-(Hex-)Hex-HexNAc-HexNAc+HexNAc2	Hex-Hex-(Hex-Hex-)Hex-HexNAc-HexNAc+HexNAc2
	6628	995.348	2-6-0-0-0	EEEAIQLDGLNASQIR	6628	6625	1055.8	1055.47	3	3163.39	55.96	995.348	EEEAIQLDGLNASQIR	-	No	1	0.73	153.12	9.23	-1	TRUE	4.17	2-6-0-0-0	0-1-0-0-0	Hex-Hex-Hex-(Hex-)Hex-HexNAc-HexNAc+HexNAc1	Hex-Hex-(Hex-Hex-)Hex-HexNAc-HexNAc+HexNAc1
	6681	888.895	4-5-3-1-0	GVFITNETGQPLIGK	6681	6680	1310.25	1309.25	3	3924.72	56.3	888.895	GVFITNETGQPLIGK	-	No	1	0.95	29.5	143.43	-3	TRUE	3.98	4-5-3-1-0	1-1-1-0-0	NeuAc-Hex-(DeHex-)HexNAc-Hex-(Hex-)Hex-HexNAc-(DeHex-)HexNAc+Hex1HexNAc1DeHex1
	6775	888.883	2-8-0-0-0	TNSTFVQALVEHVK	6775	6768	1092.82	1092.82	3	3275.45	56.93	888.883	GVFITNETGQPLIGK	-	No	1	0.79	163.75	27.83	0	TRUE	3.8	2-8-0-0-0	0-1-0-0-0	Hex-Hex-Hex-Hex-Hex-(Hex-)Hex-HexNAc-HexNAc+HexNAc1	Hex-Hex-Hex-Hex-(Hex-Hex-)Hex-HexNAc-HexNAc+HexNAc1	Hex-Hex-Hex-(Hex-Hex-Hex-)Hex-HexNAc-HexNAc+HexNAc1
	6777	855.191	2-3-1-0-0	ENTSDPSLVIAFGR	6777	6768	1273.07	1272.57	2	2543.12	56.94	855.191	ENTSDPSLVIAFGR	-	No	1	0.73	170.3	0	0	TRUE	4.03	2-3-1-0-0	0-0-1-0-0	Hex-(Hex-)Hex-HexNAc-HexNAc+DeHex1
	6784	862.314	2-8-0-0-0	SINVTGQGFSLIQR	6784	6779	1075.14	1074.81	3	3221.41	56.99	862.314	SINVTGQGFSLIQR	-	No	1	0.76	190.92	68.51	0	TRUE	3.26	2-8-0-0-0	0-1-0-0-0	Hex-Hex-Hex-Hex-Hex-(Hex-)Hex-HexNAc-HexNAc+HexNAc1	Hex-Hex-Hex-Hex-(Hex-Hex-)Hex-HexNAc-HexNAc+HexNAc1	Hex-Hex-Hex-(Hex-Hex-Hex-)Hex-HexNAc-HexNAc+HexNAc1
	6824	1364.58	2-6-0-0-0	LANDTLIYFTSDQGAHVEEVSSK	6824	6823	1302.24	1301.58	3	3901.71	57.26	1364.58	LANDTLIYFTSDQGAHVEEVSSK	-	No	1	0.71	123.77	1.1	0	TRUE	7.51	2-6-0-0-0	0-1-0-0-0	Hex-Hex-Hex-(Hex-)Hex-HexNAc-HexNAc+HexNAc1	Hex-Hex-(Hex-Hex-)Hex-HexNAc-HexNAc+HexNAc1
	6865	1267	3-5-1-0-0	DIENLKDASSFLAEWQNITK	6865	6856	1298.55	1298.21	3	3891.61	57.53	920.11	-	-	No	0	1	11.76	337.74	0	FALSE	-	3-8-1-0-0		Hex-Hex-(DeHex-HexNAc-)Hex-(Hex-Hex-(Hex-)Hex-)Hex-HexNAc-HexNAc+Hex	Hex-Hex-(DeHex-HexNAc-)Hex-(Hex-Hex-Hex-Hex-)Hex-HexNAc-HexNAc+Hex	Hex-Hex-(DeHex-HexNAc-)Hex-(Hex-(Hex-Hex-)Hex-)Hex-HexNAc-HexNAc+Hex
	6991	939.935	2-6-0-0-0	TQNFTLLVQGSPELK	6991	6988	1019.13	1018.47	3	3052.39	58.42	939.935	TQNFTLLVQGSPELK	-	No	1	0.78	158.09	11.49	0	FALSE	1.28	2-6-0-0-0	0-1-0-0-0	Hex-Hex-Hex-(Hex-)Hex-HexNAc-HexNAc+HexNAc1	Hex-Hex-(Hex-Hex-)Hex-HexNAc-HexNAc+HexNAc1
	7041	939.881	2-5-0-0-0	TQNFTLLVQGSPELK	7041	7032	964.784	964.446	3	2890.32	58.76	939.881	TQNFTLLVQGSPELK	-	No	1	0.78	139.41	2.57	-1	TRUE	4.73	2-5-0-0-0	0-1-0-0-0	Hex-Hex-(Hex-)Hex-HexNAc-HexNAc+HexNAc1	Hex-(Hex-Hex-)Hex-HexNAc-HexNAc+HexNAc1
	7112	934.89	2-8-0-0-0	RPPLAELAALNLSGSR	7112	7109	1123.52	1123.18	3	3366.53	59.26	934.89	RPPLAELAALNLSGSR	-	No	1	0.9	123.27	11.52	0	TRUE	1.16	2-8-0-0-0	0-1-0-0-0	Hex-Hex-Hex-Hex-Hex-(Hex-)Hex-HexNAc-HexNAc+HexNAc1	Hex-Hex-Hex-Hex-(Hex-Hex-)Hex-HexNAc-HexNAc+HexNAc1	Hex-Hex-Hex-(Hex-Hex-Hex-)Hex-HexNAc-HexNAc+HexNAc1
	7816	770.213	2-9-0-0-0	ANNSWFQSILR	7816	7813	1067.78	1067.44	3	3199.31	64.31	770.213	ANNSWFQSILR	-	No	1	0.94	126.17	71.16	-2	TRUE	2.06	2-9-0-0-0	0-2-0-0-0	Hex-Hex-Hex-Hex-Hex-(Hex-)Hex-HexNAc-HexNAc+HexNAc2	Hex-Hex-Hex-Hex-(Hex-Hex-)Hex-HexNAc-HexNAc+HexNAc2	Hex-Hex-Hex-(Hex-Hex-Hex-)Hex-HexNAc-HexNAc+HexNAc2
	7855	770.256	2-8-0-0-0	ANNSWFQSILR	7855	7846	1520.65	1519.63	2	3037.25	64.63	770.256	ANNSWFQSILR	-	No	1	0.84	40.91	22.63	0	TRUE	1.93	2-8-0-0-0	0-1-0-0-0	Hex-Hex-Hex-Hex-Hex-(Hex-)Hex-HexNAc-HexNAc+HexNAc1	Hex-Hex-Hex-Hex-(Hex-Hex-)Hex-HexNAc-HexNAc+HexNAc1	Hex-Hex-Hex-(Hex-Hex-Hex-)Hex-HexNAc-HexNAc+HexNAc1
	8078	978.282	2-6-0-0-0	TDDEVVQREEEAIQLDGLNASQIR	8078	8077	1027.96	1027.46	4	4105.83	66.33	978.282	TDDEVVQREEEAIQLDGLNASQIR	-	No	1	0.83	222.28	23.6	0	TRUE	2.02	2-6-0-0-0	0-1-0-0-0	Hex-Hex-Hex-(Hex-)Hex-HexNAc-HexNAc+HexNAc1	Hex-Hex-(Hex-Hex-)Hex-HexNAc-HexNAc+HexNAc1
	8095	1466.65	4-3-1-0-0	TDDEVVQREEEAIQLDGLNASQIR	8095	8088	1392.3	1391.64	3	4171.89	66.45	1466.65	TDDEVVQREEEAIQLDGLNASQIR	-	No	1	0.77	154.44	55.86	-2	TRUE	3.28	4-3-1-0-0	1-0-1-0-0	HexNAc-Hex-(Hex-)Hex-HexNAc-HexNAc+Hex1DeHex1	Hex-(HexNAc-Hex-)Hex-HexNAc-HexNAc+Hex1DeHex1
	8190	1169.42	2-8-0-0-0	SLQNIQDDFNNAILVNTSK	8190	8187	1279.9	1279.57	3	3835.67	67.21	1169.42	SLQNIQDDFNNAILVNTSK	-	No	1	0.72	118.86	10.92	-2	TRUE	4.26	2-8-0-0-0	0-2-0-0-0	Hex-Hex-Hex-Hex-(Hex-)Hex-HexNAc-HexNAc+HexNAc2	Hex-Hex-Hex-(Hex-Hex-)Hex-HexNAc-HexNAc+HexNAc2	Hex-Hex-(Hex-Hex-Hex-)Hex-HexNAc-HexNAc+HexNAc2
	8210	1332.57	2-3-1-0-0	FNPNISWQPIPVHTVPITEDR	8210	8209	1167.56	1166.89	3	3497.66	67.37	1332.57	FNPNISWQPIPVHTVPITEDR	-	No	1	0.76	133.12	0	-1	TRUE	4.12	2-3-1-0-0	0-0-1-0-0	Hex-(Hex-)Hex-HexNAc-HexNAc+DeHex1
	8232	1169.37	2-7-0-0-0	SLQNIQDDFNNAILVNTSK	8232	8231	1225.88	1225.55	3	3673.62	67.54	780.054	SLQNIQDDFNNAILVNTSK	-	No	0	0.84	15.56	9.16	0	TRUE	5.05	2-7-0-0-0	0-1-0-0-0	Hex-Hex-Hex-Hex-(Hex-)Hex-HexNAc-HexNAc+HexNAc1	Hex-Hex-Hex-(Hex-Hex-)Hex-HexNAc-HexNAc+HexNAc1	Hex-Hex-(Hex-Hex-Hex-)Hex-HexNAc-HexNAc+HexNAc1
	8337	935.768	2-8-0-0-0	YYTNNFITNLTFR	8337	8330	1124.48	1123.8	3	3368.39	68.39	935.768	YYTNNFITNLTFR	-	No	1	0.72	164.57	76.14	0	TRUE	3.48	2-8-0-0-0	0-1-0-0-0	Hex-Hex-Hex-Hex-Hex-(Hex-)Hex-HexNAc-HexNAc+HexNAc1	Hex-Hex-Hex-Hex-(Hex-Hex-)Hex-HexNAc-HexNAc+HexNAc1	Hex-Hex-Hex-(Hex-Hex-Hex-)Hex-HexNAc-HexNAc+HexNAc1
	8771	1017.92	3-4-1-1-0	TYTYADTPDDFQLHNFSLPEEDTK	8771	8770	1136.72	1136.48	4	4541.87	72.36	828.355	VDNITDQFCNASVVDPACVR	-	No	0	0.83	8.47	230.76	0	TRUE	6.34	5-5-1-1-0	0-0-0-1-0	Hex-HexNAc-Hex-(HexNAc-(Hex-HexNAc-)Hex-)Hex-HexNAc-(DeHex-)HexNAc+NeuAc1	Hex-HexNAc-Hex-HexNAc-Hex-(HexNAc-Hex-)Hex-HexNAc-(DeHex-)HexNAc+NeuAc1	HexNAc-(Hex-)Hex-(HexNAc-(Hex-HexNAc-)Hex-)Hex-HexNAc-(DeHex-)HexNAc+NeuAc1	HexNAc-(HexNAc-)Hex-(Hex-(Hex-HexNAc-)Hex-)Hex-HexNAc-(DeHex-)HexNAc+NeuAc1	HexNAc-(Hex-Hex-)Hex-(HexNAc-(HexNAc-)Hex-)Hex-HexNAc-(DeHex-)HexNAc+NeuAc1	Hex-HexNAc-Hex-HexNAc-(HexNAc-)Hex-(Hex-)Hex-HexNAc-(DeHex-)HexNAc+NeuAc1	HexNAc-(Hex-HexNAc-)Hex-(Hex-(HexNAc-)Hex-)Hex-HexNAc-(DeHex-)HexNAc+NeuAc1
	8925	977.927	2-6-0-0-0	DYYPINESLASLPLR	8925	8924	1044.48	1043.8	3	3128.39	73.77	977.927	DYYPINESLASLPLR	-	No	1	0.77	195.78	26.27	0	FALSE	2.34	2-6-0-0-0	0-1-0-0-0	Hex-Hex-Hex-(Hex-)Hex-HexNAc-HexNAc+HexNAc1	Hex-Hex-(Hex-Hex-)Hex-HexNAc-HexNAc+HexNAc1
	9228	1003.84	2-8-0-0-0	LSALDNLLNHSSMFLK	9228	9221	1169.86	1169.18	3	3504.53	76.52	1003.84	LSALDNLLNHSSMFLK	-	No	1	0.74	210.52	71.85	-2	TRUE	1.46	2-8-0-0-0	0-2-0-0-0	Hex-Hex-Hex-Hex-(Hex-)Hex-HexNAc-HexNAc+HexNAc2	Hex-Hex-Hex-(Hex-Hex-)Hex-HexNAc-HexNAc+HexNAc2	Hex-Hex-(Hex-Hex-Hex-)Hex-HexNAc-HexNAc+HexNAc2
	9250	1003.96	2-6-0-0-0	LSALDNLLNHSSMFLK	9250	9243	1061.82	1061.15	3	3180.43	76.75	1003.96	LSALDNLLNHSSMFLK	-	No	1	0.78	182.72	36.33	0	TRUE	4.15	2-6-0-0-0	0-1-0-0-0	Hex-Hex-Hex-(Hex-)Hex-HexNAc-HexNAc+HexNAc1	Hex-Hex-(Hex-Hex-)Hex-HexNAc-HexNAc+HexNAc1
Sequence records with no mannuel verification					294	289	857.034	856.7	3	2567.08	14.94	573.265	AEPPLNASASDQGEK	-	No	0	0.89	0.14	0	0	TRUE	0.48	2-4-0-0-0	0-1-0-0-0	Hex-(Hex-)Hex-HexNAc-HexNAc+HexNAc1
					312	311	671.531	671.281	4	2681.09	15.04	394.517	LCLNNDTK	-	No	0	0.67	20.73	27.42	-2	TRUE	3.37	6-3-0-0-0	2-0-0-0-0	HexNAc-(HexNAc-)Hex-(Hex-)Hex-HexNAc-HexNAc+Hex2	HexNAc-Hex-(HexNAc-Hex-)Hex-HexNAc-HexNAc+Hex2
					320	311	698.981	698.652	3	2092.93	15.08	346.913	NTTIFLK	-	No	0	0.91	17.23	0	-2	TRUE	0	3-4-0-0-0	1-1-0-0-0	Hex-(Hex-)Hex-HexNAc-HexNAc+Hex1HexNAc1
					329	322	1000.77	1000.44	3	2998.28	15.13	878.865	IVTPEEYYNVTVQ	-	No	0	0.88	6.82	0	-3	TRUE	3.5	4-3-1-0-0	2-0-1-0-0	Hex-(Hex-)Hex-HexNAc-HexNAc+Hex2DeHex1
					334	333	663.779	663.529	4	2650.09	15.16	339.159	VNETEMDIAK	-	No	0	0.97	15.12	1.61	-2	TRUE	4.15	5-3-0-0-0	2-0-0-0-0	HexNAc-Hex-(Hex-)Hex-HexNAc-HexNAc+Hex2	Hex-(HexNAc-Hex-)Hex-HexNAc-HexNAc+Hex2
					391	388	718.628	718.291	3	2151.85	15.47	367.169	SFNATAER	-	No	0	0.98	2.62	9.14	0	TRUE	9.98	3-4-0-0-0	0-1-0-0-0	HexNAc-Hex-(Hex-)Hex-HexNAc-HexNAc+HexNAc1	Hex-(HexNAc-Hex-)Hex-HexNAc-HexNAc+HexNAc1
					395	388	746.308	746.059	4	2980.21	15.49	507.267	SPVQENSSDLNK	-	No	0	0.96	14.09	19.42	0	TRUE	8.27	5-4-0-0-0	0-1-0-0-0	HexNAc-(HexNAc-)Hex-(HexNAc-Hex-)Hex-HexNAc-HexNAc+HexNAc1	HexNAc-Hex-(HexNAc-(HexNAc-)Hex-)Hex-HexNAc-HexNAc+HexNAc1
					404	399	778.337	778.003	3	2330.99	15.54	386.529	NTTSYVLR	-	No	0	0.99	64.12	15.7	0	TRUE	4.61	2-6-0-0-0	0-1-0-0-0	Hex-Hex-Hex-(Hex-)Hex-HexNAc-HexNAc+HexNAc1	Hex-Hex-(Hex-Hex-)Hex-HexNAc-HexNAc+HexNAc1
					411	410	1167	1166.5	2	2330.99	15.58	1157.72	NTTSYVLR	-	No	0	0.65	36.3	0	-3	TRUE	4.82	2-6-0-0-0	0-3-0-0-0	Hex-(Hex-)Hex-HexNAc-HexNAc+HexNAc3
					413	410	732.299	731.965	3	2192.87	15.59	394.413	LCLNNDTK	-	No	0	0.97	0.8	0.35	0	TRUE	8.13	2-5-0-0-0	0-1-0-0-0	Hex-Hex-(Hex-)Hex-HexNAc-HexNAc+HexNAc1	Hex-(Hex-Hex-)Hex-HexNAc-HexNAc+HexNAc1
					422	421	994.743	994.408	3	2980.2	15.64	760.397	SPVQENSSDLNK	-	No	0	0.97	23.88	7.35	-3	TRUE	9.99	5-4-0-0-0	3-0-0-0-0	Hex-Hex-(Hex-)Hex-HexNAc-HexNAc+Hex3	Hex-(Hex-Hex-)Hex-HexNAc-HexNAc+Hex3
					428	421	911.061	910.724	3	2729.15	15.67	858.734	AEPPLNASASDQGEK	-	No	0	0.95	2.88	0.09	-1	TRUE	5.9	2-5-0-0-0	0-1-0-0-0	Hex-Hex-(Hex-)Hex-HexNAc-HexNAc+HexNAc1	Hex-(Hex-Hex-)Hex-HexNAc-HexNAc+HexNAc1
					441	432	1097.44	1097.44	2	2192.87	15.75	591.273	LCLNNDTK	-	No	0	0.98	0.4	0.27	0	TRUE	9.57	2-5-0-0-0	0-1-0-0-0	Hex-Hex-(Hex-)Hex-HexNAc-HexNAc+HexNAc1	Hex-(Hex-Hex-)Hex-HexNAc-HexNAc+HexNAc1
					479	476	802.016	801.357	3	2401.05	15.99	346.913	NTTIFLK	-	No	0	0.81	9.36	24.6	0	TRUE	1.73	3-5-1-0-0	0-1-0-0-0	HexNAc-(Hex-)Hex-(Hex-)Hex-HexNAc-(DeHex-)HexNAc+HexNAc1	Hex-HexNAc-Hex-(Hex-)Hex-HexNAc-(DeHex-)HexNAc+HexNAc1	HexNAc-Hex-(Hex-Hex-)Hex-HexNAc-(DeHex-)HexNAc+HexNAc1
					481	476	954.737	954.403	3	2860.19	16	661.308	VQPFNVTQGK	-	No	0	0.82	2.13	237.77	0	TRUE	6.15	3-7-0-0-0	0-1-0-0-0	HexNAc-(Hex-Hex-)Hex-(Hex-Hex-)Hex-HexNAc-HexNAc+HexNAc1	HexNAc-(Hex-)Hex-(Hex-Hex-Hex-)Hex-HexNAc-HexNAc+HexNAc1	Hex-HexNAc-Hex-(Hex-(Hex-)Hex-)Hex-HexNAc-HexNAc+HexNAc1	Hex-HexNAc-Hex-(Hex-Hex-Hex-)Hex-HexNAc-HexNAc+HexNAc1	Hex-Hex-(Hex-)Hex-(HexNAc-Hex-)Hex-HexNAc-HexNAc+HexNAc1	Hex-(Hex-Hex-)Hex-(HexNAc-Hex-)Hex-HexNAc-HexNAc+HexNAc1	Hex-(Hex-)Hex-(HexNAc-(Hex-)Hex-)Hex-HexNAc-HexNAc+HexNAc1	HexNAc-(Hex-)Hex-(Hex-(Hex-)Hex-)Hex-HexNAc-HexNAc+HexNAc1	Hex-(Hex-)Hex-(Hex-HexNAc-Hex-)Hex-HexNAc-HexNAc+HexNAc1	Hex-Hex-Hex-(HexNAc-(Hex-)Hex-)Hex-HexNAc-HexNAc+HexNAc1	Hex-Hex-Hex-(Hex-HexNAc-Hex-)Hex-HexNAc-HexNAc+HexNAc1	Hex-Hex-Hex-Hex-(HexNAc-Hex-)Hex-HexNAc-HexNAc+HexNAc1	Hex-Hex-(Hex-HexNAc-)Hex-(Hex-)Hex-HexNAc-HexNAc+HexNAc1	Hex-Hex-Hex-(HexNAc-)Hex-(Hex-)Hex-HexNAc-HexNAc+HexNAc1	Hex-HexNAc-(Hex-)Hex-(Hex-Hex-)Hex-HexNAc-HexNAc+HexNAc1	Hex-HexNAc-(Hex-Hex-)Hex-(Hex-)Hex-HexNAc-HexNAc+HexNAc1	Hex-Hex-(HexNAc-)Hex-(Hex-Hex-)Hex-HexNAc-HexNAc+HexNAc1
					527	520	940.071	939.41	3	2815.21	16.31	661.308	SYSTTYEERNITGTR	-	No	0	0.92	0.25	0	0	TRUE	1.99	2-3-1-0-0	0-0-1-0-0	Hex-(Hex-)Hex-HexNAc-HexNAc+DeHex1
					529	520	1034.75	1034.41	3	3100.2	16.32	878.865	YEQGTGCWQGPNR	-	No	0	0.88	5.98	1.22	0	TRUE	2.6	3-4-0-1-0	0-0-0-1-0	HexNAc-(Hex-)Hex-(Hex-)Hex-HexNAc-HexNAc+NeuAc1	Hex-HexNAc-Hex-(Hex-)Hex-HexNAc-HexNAc+NeuAc1	HexNAc-Hex-(Hex-Hex-)Hex-HexNAc-HexNAc+NeuAc1
					591	586	780.337	780.009	3	2337.01	16.7	560.737	ANLTWSVK	-	No	0	0.68	21.87	6.32	0	TRUE	1.46	3-5-0-0-0	0-1-0-0-0	HexNAc-(Hex-)Hex-(Hex-)Hex-HexNAc-HexNAc+HexNAc1	Hex-HexNAc-Hex-(Hex-)Hex-HexNAc-HexNAc+HexNAc1	HexNAc-Hex-(Hex-Hex-)Hex-HexNAc-HexNAc+HexNAc1
					613	608	1198.99	1198.99	2	2395.97	16.83	692.818	YEQLQNETR	-	No	0	0.81	66.69	8.22	0	TRUE	5.5	2-5-0-0-0	0-1-0-0-0	Hex-Hex-(Hex-)Hex-HexNAc-HexNAc+HexNAc1	Hex-(Hex-Hex-)Hex-HexNAc-HexNAc+HexNAc1
					650	641	1118.47	1117.97	2	2233.92	17.05	692.818	YEQLQNETR	-	No	1	0.7	156.72	0	0	TRUE	2.19	2-4-0-0-0	0-1-0-0-0	Hex-(Hex-)Hex-HexNAc-HexNAc+HexNAc1
					659	652	873.39	873.056	3	2616.15	17.1	761.351	LFNVTPQDEQK	-	No	0	0.88	4.8	0.39	0	TRUE	2.33	4-3-0-0-0	1-0-0-0-0	HexNAc-Hex-(Hex-)Hex-HexNAc-HexNAc+Hex1	Hex-(HexNAc-Hex-)Hex-HexNAc-HexNAc+Hex1
					664	663	732.297	731.964	3	2192.87	17.13	394.517	LCLNNDTK	-	No	0	0.98	1.08	0.86	0	TRUE	9.24	2-5-0-0-0	0-1-0-0-0	Hex-Hex-(Hex-)Hex-HexNAc-HexNAc+HexNAc1	Hex-(Hex-Hex-)Hex-HexNAc-HexNAc+HexNAc1
					703	696	868.063	867.729	3	2600.16	17.36	854.706	ENTSDPSLVIAFGR	-	No	0	0.92	3.55	0	0	TRUE	4.13	3-3-0-0-0	1-0-0-0-0	Hex-(Hex-)Hex-HexNAc-HexNAc+Hex1
					749	740	1015.41	1015.09	3	3042.24	17.66	1003.4	TAVNCSSDFDACLITK	-	No	0	0.84	10.05	0.47	0	TRUE	3.29	3-3-1-0-0	0-0-1-0-0	HexNAc-Hex-(Hex-)Hex-HexNAc-HexNAc+DeHex1	Hex-(HexNAc-Hex-)Hex-HexNAc-HexNAc+DeHex1
					815	806	877.041	876.71	3	2627.11	18.09	376.426	LLNINPNK	-	No	0	0.87	48.25	29.57	-2	TRUE	5.39	2-8-0-0-0	0-2-0-0-0	Hex-Hex-Hex-Hex-(Hex-)Hex-HexNAc-HexNAc+HexNAc2	Hex-Hex-Hex-(Hex-Hex-)Hex-HexNAc-HexNAc+HexNAc2	Hex-Hex-(Hex-Hex-Hex-)Hex-HexNAc-HexNAc+HexNAc2
					886	883	819.693	819.354	3	2455.04	18.55	810.655	AENQVNVTCQVR	-	No	0	0.72	100.15	0	-1	TRUE	9.25	2-3-1-0-0	0-0-1-0-0	Hex-(Hex-)Hex-HexNAc-HexNAc+DeHex1
					908	905	732.298	731.964	3	2192.87	18.69	394.379	LCLNNDTK	-	No	0	0.97	1.43	0.35	0	TRUE	8.91	2-5-0-0-0	0-1-0-0-0	Hex-Hex-(Hex-)Hex-HexNAc-HexNAc+HexNAc1	Hex-(Hex-Hex-)Hex-HexNAc-HexNAc+HexNAc1
					936	927	1378.55	1378.05	2	2754.09	18.86	648.292	LENWTDASR	-	No	0	0.97	1.78	13.22	0	TRUE	10.19	5-4-0-0-0	1-0-0-0-0	HexNAc-(Hex-)Hex-(HexNAc-Hex-)Hex-HexNAc-HexNAc+Hex1	Hex-HexNAc-(HexNAc-)Hex-(Hex-)Hex-HexNAc-HexNAc+Hex1	HexNAc-Hex-HexNAc-Hex-(Hex-)Hex-HexNAc-HexNAc+Hex1	Hex-HexNAc-Hex-(HexNAc-Hex-)Hex-HexNAc-HexNAc+Hex1	HexNAc-(HexNAc-)Hex-(Hex-Hex-)Hex-HexNAc-HexNAc+Hex1	HexNAc-Hex-(Hex-(HexNAc-)Hex-)Hex-HexNAc-HexNAc+Hex1
					939	938	783.589	783.338	4	3129.32	18.88	331.172	VQPFNVTQGK	-	No	0	0.83	0.39	100.47	-3	TRUE	6.79	6-4-1-0-0	3-0-0-0-0	Hex-HexNAc-Hex-(Hex-)Hex-HexNAc-(DeHex-)HexNAc+Hex3	HexNAc-Hex-(Hex-Hex-)Hex-HexNAc-(DeHex-)HexNAc+Hex3	HexNAc-(Hex-)Hex-(Hex-)Hex-HexNAc-(DeHex-)HexNAc+Hex3
					976	971	1001.41	1001.07	3	3000.2	19.15	751.844	IGTFCSNGTVSR	-	No	0	0.81	5.76	7.27	0	TRUE	2.36	2-8-0-0-0	0-1-0-0-0	Hex-Hex-Hex-Hex-Hex-(Hex-)Hex-HexNAc-HexNAc+HexNAc1	Hex-Hex-Hex-Hex-(Hex-Hex-)Hex-HexNAc-HexNAc+HexNAc1	Hex-Hex-Hex-(Hex-Hex-Hex-)Hex-HexNAc-HexNAc+HexNAc1
					1090	1081	964.739	964.739	3	2891.2	19.89	859.189	AEPPLNASASDQGEK	-	No	1	0.72	180.05	25.66	0	TRUE	3.72	2-6-0-0-0	0-1-0-0-0	Hex-Hex-Hex-(Hex-)Hex-HexNAc-HexNAc+HexNAc1	Hex-Hex-(Hex-Hex-)Hex-HexNAc-HexNAc+HexNAc1
					1099	1092	1060.5	1060.16	3	3177.46	19.95	713.533	DFEDLYTPVNGSIVIVR	-	No	0	0.85	1.51	1.19	0	TRUE	0.23	3-3-1-0-0	0-0-1-0-0	HexNAc-Hex-(Hex-)Hex-HexNAc-HexNAc+DeHex1	Hex-(HexNAc-Hex-)Hex-HexNAc-HexNAc+DeHex1
					1108	1103	1421.55	1421.05	2	2840.09	20	671.558	FGCEIENNR	-	No	1	0.72	50.71	27.82	0	TRUE	4.81	2-8-0-0-0	0-1-0-0-0	Hex-Hex-Hex-Hex-Hex-(Hex-)Hex-HexNAc-HexNAc+HexNAc1	Hex-Hex-Hex-Hex-(Hex-Hex-)Hex-HexNAc-HexNAc+HexNAc1	Hex-Hex-Hex-(Hex-Hex-Hex-)Hex-HexNAc-HexNAc+HexNAc1
					1110	1103	948.035	947.699	3	2840.07	20.01	671.524	FGCEIENNR	-	No	1	1	194.75	209.16	0	TRUE	1.2	2-8-0-0-0	0-1-0-0-0	Hex-Hex-Hex-Hex-Hex-(Hex-)Hex-HexNAc-HexNAc+HexNAc1	Hex-Hex-Hex-Hex-(Hex-Hex-)Hex-HexNAc-HexNAc+HexNAc1	Hex-Hex-Hex-(Hex-Hex-Hex-)Hex-HexNAc-HexNAc+HexNAc1
					1117	1114	911.386	910.72	3	2729.14	20.06	573.265	AEPPLNASASDQGEK	-	No	0	0.85	16.31	4.28	0	TRUE	2.06	2-5-0-0-0	0-1-0-0-0	Hex-Hex-(Hex-)Hex-HexNAc-HexNAc+HexNAc1	Hex-(Hex-Hex-)Hex-HexNAc-HexNAc+HexNAc1
					1134	1125	809.704	809.704	3	2426.09	20.16	376.426	LLNINPNK	-	No	0	0.92	2.95	0	-3	TRUE	2.52	5-3-0-0-0	3-0-0-0-0	Hex-(Hex-)Hex-HexNAc-HexNAc+Hex3
					1172	1169	1366.58	1365.57	2	2729.13	20.41	859.212	AEPPLNASASDQGEK	-	No	1	0.83	92.77	25.9	0	TRUE	0.81	2-5-0-0-0	0-1-0-0-0	Hex-Hex-(Hex-)Hex-HexNAc-HexNAc+HexNAc1	Hex-(Hex-Hex-)Hex-HexNAc-HexNAc+HexNAc1
					1181	1180	855.374	855.374	3	2563.1	20.47	346.913	NTTIFLK	-	No	0	0.89	2.33	3.71	0	TRUE	1.71	3-6-1-0-0	0-1-0-0-0	Hex-HexNAc-(Hex-)Hex-(Hex-)Hex-HexNAc-(DeHex-)HexNAc+HexNAc1	HexNAc-Hex-(Hex-Hex-Hex-)Hex-HexNAc-(DeHex-)HexNAc+HexNAc1	HexNAc-Hex-(Hex-(Hex-)Hex-)Hex-HexNAc-(DeHex-)HexNAc+HexNAc1	Hex-HexNAc-Hex-(Hex-Hex-)Hex-HexNAc-(DeHex-)HexNAc+HexNAc1	HexNAc-(Hex-)Hex-(Hex-Hex-)Hex-HexNAc-(DeHex-)HexNAc+HexNAc1	HexNAc-(Hex-Hex-)Hex-(Hex-)Hex-HexNAc-(DeHex-)HexNAc+HexNAc1
					1222	1213	1122.48	1122.48	3	3364.42	20.73	738.878	ALSPNSTISSAPK	-	No	0	0.63	3.83	75.79	0	TRUE	0.22	4-7-1-0-0	1-0-0-0-0	HexNAc-Hex-Hex-Hex-Hex-Hex-(Hex-)Hex-HexNAc-(DeHex-)HexNAc+Hex1	Hex-Hex-Hex-Hex-Hex-(HexNAc-Hex-)Hex-HexNAc-(DeHex-)HexNAc+Hex1	HexNAc-Hex-Hex-Hex-(Hex-Hex-Hex-)Hex-HexNAc-(DeHex-)HexNAc+Hex1	Hex-Hex-Hex-(HexNAc-Hex-Hex-Hex-)Hex-HexNAc-(DeHex-)HexNAc+Hex1
					1231	1224	1054.79	1054.45	3	3160.33	20.79	573.265	AEPPLNASASDQGEK	-	No	0	0.92	1.2	2.49	0	TRUE	2.86	5-3-1-0-0	1-0-0-0-0	HexNAc-(HexNAc-)Hex-(Hex-)Hex-HexNAc-(DeHex-)HexNAc+Hex1	HexNAc-Hex-(HexNAc-Hex-)Hex-HexNAc-(DeHex-)HexNAc+Hex1
					1233	1224	1144.85	1144.51	3	3430.5	20.8	1116.54	VASVININPNTTHSTGSCR	-	No	0	0.59	2.46	100	0	TRUE	0.28	3-4-1-0-0	1-0-0-0-0	Hex-Hex-(Hex-)Hex-HexNAc-(DeHex-)HexNAc+Hex1	Hex-(Hex-Hex-)Hex-HexNAc-(DeHex-)HexNAc+Hex1
					1242	1235	1068.08	1067.75	3	3200.24	20.86	928.887	NTNENPQECFNASK	-	No	0	0.8	8.68	2.68	0	TRUE	1.53	3-4-0-1-0	0-0-0-1-0	HexNAc-Hex-(Hex-Hex-)Hex-HexNAc-HexNAc+NeuAc1	Hex-HexNAc-Hex-(Hex-)Hex-HexNAc-HexNAc+NeuAc1	HexNAc-(Hex-)Hex-(Hex-)Hex-HexNAc-HexNAc+NeuAc1
					1275	1268	1005.43	1005.09	3	3012.26	21.08	579.289	NTTSYVLR	-	No	0	0.64	31.41	147.02	0	TRUE	8.27	4-5-1-1-0	0-1-0-0-0	NeuAc-Hex-HexNAc-Hex-(HexNAc-Hex-)Hex-HexNAc-(DeHex-)HexNAc+HexNAc1	NeuAc-Hex-HexNAc-(HexNAc-)Hex-(Hex-)Hex-HexNAc-(DeHex-)HexNAc+HexNAc1
					1282	1279	919.399	919.063	3	2754.17	21.13	870.676	KQNNGAFNETLFR	-	No	0	0.54	63.47	6.44	0	TRUE	8.78	2-5-0-0-0	0-1-0-0-0	Hex-Hex-(Hex-)Hex-HexNAc-HexNAc+HexNAc1	Hex-(Hex-Hex-)Hex-HexNAc-HexNAc+HexNAc1
					1291	1290	1182.81	1182.14	3	3543.4	21.19	937.406	EFGFAWPESLNCSK	-	No	0	0.84	1.31	0.72	-2	TRUE	0.62	3-6-0-1-0	1-0-0-1-0	Hex-Hex-Hex-Hex-(Hex-)Hex-HexNAc-HexNAc+Hex1NeuAc1	Hex-Hex-Hex-(Hex-Hex-)Hex-HexNAc-HexNAc+Hex1NeuAc1	Hex-Hex-(Hex-Hex-Hex-)Hex-HexNAc-HexNAc+Hex1NeuAc1
					1310	1301	1091.43	1091.43	3	3271.28	21.31	671.784	FGCEIENNR	-	No	0	0.61	11.87	147.97	0	TRUE	6.87	5-6-1-0-0	1-0-0-0-0	Hex-HexNAc-(HexNAc-)Hex-(Hex-Hex-Hex-)Hex-HexNAc-(DeHex-)HexNAc+Hex1	Hex-HexNAc-(HexNAc-)Hex-(Hex-(Hex-)Hex-)Hex-HexNAc-(DeHex-)HexNAc+Hex1	Hex-HexNAc-(Hex-HexNAc-)Hex-(Hex-Hex-)Hex-HexNAc-(DeHex-)HexNAc+Hex1	HexNAc-(Hex-Hex-)Hex-(Hex-HexNAc-Hex-)Hex-HexNAc-(DeHex-)HexNAc+Hex1	HexNAc-(Hex-)Hex-(HexNAc-(Hex-Hex-)Hex-)Hex-HexNAc-(DeHex-)HexNAc+Hex1	HexNAc-(Hex-)Hex-(Hex-HexNAc-(Hex-)Hex-)Hex-HexNAc-(DeHex-)HexNAc+Hex1	Hex-HexNAc-Hex-HexNAc-(Hex-)Hex-(Hex-)Hex-HexNAc-(DeHex-)HexNAc+Hex1	HexNAc-(Hex-Hex-)Hex-(HexNAc-(Hex-)Hex-)Hex-HexNAc-(DeHex-)HexNAc+Hex1	Hex-Hex-(HexNAc-)Hex-(HexNAc-(Hex-)Hex-)Hex-HexNAc-(DeHex-)HexNAc+Hex1	Hex-Hex-(Hex-HexNAc-)Hex-(HexNAc-Hex-)Hex-HexNAc-(DeHex-)HexNAc+Hex1	Hex-Hex-Hex-(HexNAc-)Hex-(HexNAc-Hex-)Hex-HexNAc-(DeHex-)HexNAc+Hex1	Hex-HexNAc-(Hex-)Hex-(Hex-HexNAc-Hex-)Hex-HexNAc-(DeHex-)HexNAc+Hex1	Hex-HexNAc-(Hex-)Hex-(HexNAc-(Hex-)Hex-)Hex-HexNAc-(DeHex-)HexNAc+Hex1	Hex-HexNAc-(Hex-Hex-)Hex-(HexNAc-Hex-)Hex-HexNAc-(DeHex-)HexNAc+Hex1	Hex-Hex-(HexNAc-)Hex-(Hex-HexNAc-Hex-)Hex-HexNAc-(DeHex-)HexNAc+Hex1	HexNAc-Hex-HexNAc-(Hex-Hex-)Hex-(Hex-)Hex-HexNAc-(DeHex-)HexNAc+Hex1	Hex-HexNAc-Hex-HexNAc-Hex-(Hex-Hex-)Hex-HexNAc-(DeHex-)HexNAc+Hex1	HexNAc-Hex-HexNAc-(Hex-)Hex-(Hex-Hex-)Hex-HexNAc-(DeHex-)HexNAc+Hex1	Hex-(Hex-HexNAc-)Hex-(Hex-HexNAc-Hex-)Hex-HexNAc-(DeHex-)HexNAc+Hex1	Hex-(HexNAc-)Hex-(HexNAc-(Hex-Hex-)Hex-)Hex-HexNAc-(DeHex-)HexNAc+Hex1	Hex-(Hex-HexNAc-)Hex-(HexNAc-(Hex-)Hex-)Hex-HexNAc-(DeHex-)HexNAc+Hex1	HexNAc-(HexNAc-)Hex-(Hex-Hex-Hex-Hex-)Hex-HexNAc-(DeHex-)HexNAc+Hex1	Hex-(HexNAc-)Hex-(Hex-HexNAc-(Hex-)Hex-)Hex-HexNAc-(DeHex-)HexNAc+Hex1	HexNAc-(HexNAc-)Hex-(Hex-(Hex-Hex-)Hex-)Hex-HexNAc-(DeHex-)HexNAc+Hex1	HexNAc-(HexNAc-)Hex-(Hex-Hex-(Hex-)Hex-)Hex-HexNAc-(DeHex-)HexNAc+Hex1
					1339	1334	1197.52	1197.52	2	2393.02	21.51	751.844	IGTFCSNGTVSR	-	No	0	0.58	26.87	0	0	TRUE	6.33	3-3-0-0-0	1-0-0-0-0	Hex-(Hex-)Hex-HexNAc-HexNAc+Hex1
					1409	1400	970.425	970.425	3	2908.25	21.98	834.886	EASIVGENETYPR	-	No	0	0.97	31.13	8.58	0	TRUE	7.89	4-3-1-0-0	1-0-0-0-0	HexNAc-Hex-(Hex-)Hex-HexNAc-(DeHex-)HexNAc+Hex1	Hex-(HexNAc-Hex-)Hex-HexNAc-(DeHex-)HexNAc+Hex1
					1431	1422	1002.1	1001.77	3	3002.3	22.13	699.213	VFGSQNLTTVK	-	No	1	1	75.41	255.48	0	TRUE	4.96	5-4-1-0-0	1-0-0-0-0	Hex-(HexNAc-)Hex-(HexNAc-Hex-)Hex-HexNAc-(DeHex-)HexNAc+Hex1	Hex-Hex-(HexNAc-(HexNAc-)Hex-)Hex-HexNAc-(DeHex-)HexNAc+Hex1
					1436	1433	875.391	875.057	3	2622.15	22.17	560.737	ANLTWSVK	-	No	0	0.93	8.39	1.02	-3	TRUE	5.87	6-3-0-0-0	3-0-0-0-0	HexNAc-Hex-(Hex-)Hex-HexNAc-HexNAc+Hex3	Hex-(HexNAc-Hex-)Hex-HexNAc-HexNAc+Hex3
					1456	1455	684.495	684.094	5	3415.43	22.3	408.451	EGSGYFFLNTSTADVVK	-	No	0	0.86	1	12.4	-2	TRUE	1.43	3-6-0-0-0	0-2-0-0-0	HexNAc-(Hex-)Hex-(Hex-)Hex-HexNAc-HexNAc+HexNAc2	Hex-HexNAc-Hex-(Hex-)Hex-HexNAc-HexNAc+HexNAc2	HexNAc-Hex-(Hex-Hex-)Hex-HexNAc-HexNAc+HexNAc2
					1471	1466	846.361	846.026	3	2535.06	22.4	648.292	LENWTDASR	-	No	0	0.96	4.2	0.74	0	TRUE	6.45	4-3-1-0-0	1-0-0-0-0	HexNAc-Hex-(Hex-)Hex-HexNAc-(DeHex-)HexNAc+Hex1	Hex-(HexNAc-Hex-)Hex-HexNAc-(DeHex-)HexNAc+Hex1
					1486	1477	1111.5	1111.5	2	2220.98	22.49	1005.56	SNISILR	-	No	0	0.81	13.26	0.19	-2	TRUE	2.64	3-5-0-0-0	1-1-0-0-0	Hex-Hex-(Hex-)Hex-HexNAc-HexNAc+Hex1HexNAc1	Hex-(Hex-Hex-)Hex-HexNAc-HexNAc+Hex1HexNAc1
					1497	1488	864.33	864.083	4	3452.3	22.57	610.589	GSQWSDIEEFCNR	-	No	0	0.92	23.41	22.46	0	TRUE	10.68	5-5-0-0-0	0-1-0-0-0	HexNAc-(Hex-)Hex-(HexNAc-(HexNAc-)Hex-)Hex-HexNAc-HexNAc+HexNAc1	HexNAc-Hex-HexNAc-(HexNAc-)Hex-(Hex-)Hex-HexNAc-HexNAc+HexNAc1	Hex-HexNAc-(HexNAc-)Hex-(HexNAc-Hex-)Hex-HexNAc-HexNAc+HexNAc1	HexNAc-Hex-HexNAc-Hex-(HexNAc-Hex-)Hex-HexNAc-HexNAc+HexNAc1	Hex-HexNAc-Hex-(HexNAc-(HexNAc-)Hex-)Hex-HexNAc-HexNAc+HexNAc1	Hex-(HexNAc-)Hex-(HexNAc-(HexNAc-)Hex-)Hex-HexNAc-HexNAc+HexNAc1	HexNAc-(HexNAc-)Hex-(Hex-(HexNAc-)Hex-)Hex-HexNAc-HexNAc+HexNAc1
					1504	1499	1085.44	1084.76	3	3251.26	22.61	747.314	ENGTDTVQEEEESPAEGSK	-	No	0	0.8	36.92	10.79	0	TRUE	4.81	2-5-0-0-0	0-1-0-0-0	Hex-Hex-(Hex-)Hex-HexNAc-HexNAc+HexNAc1	Hex-(Hex-Hex-)Hex-HexNAc-HexNAc+HexNAc1
					1519	1510	1269.04	1268.53	2	2535.05	22.71	648.292	LENWTDASR	-	No	0	0.95	1.55	0	-3	TRUE	4.24	4-3-1-0-0	2-0-1-0-0	Hex-(Hex-)Hex-HexNAc-HexNAc+Hex2DeHex1
					1559	1554	1129.19	1129.19	4	4512.75	22.97	951.042	KENSSEICSNNGECVCGQCVCR	-	No	0	0.76	3.36	58.49	0	TRUE	4.33	6-4-0-0-0	1-0-0-0-0	HexNAc-(HexNAc-)Hex-(HexNAc-(Hex-)Hex-)Hex-HexNAc-HexNAc+Hex1	HexNAc-(Hex-HexNAc-)Hex-(HexNAc-Hex-)Hex-HexNAc-HexNAc+Hex1	HexNAc-(HexNAc-)Hex-(Hex-HexNAc-Hex-)Hex-HexNAc-HexNAc+Hex1
					1566	1565	961.427	961.085	3	2880.23	23.02	501.565	LGGWNITGPWAK	-	No	0	0.9	5.26	4.21	-3	TRUE	2.2	3-6-0-0-0	1-2-0-0-0	Hex-Hex-(Hex-)Hex-HexNAc-HexNAc+Hex1HexNAc2	Hex-(Hex-Hex-)Hex-HexNAc-HexNAc+Hex1HexNAc2
					1568	1565	1627.14	1626.64	2	3251.26	23.03	1120.34	ENGTDTVQEEEESPAEGSK	-	No	0	0.61	318.95	28.44	0	TRUE	5.11	2-5-0-0-0	0-1-0-0-0	Hex-Hex-(Hex-)Hex-HexNAc-HexNAc+HexNAc1	Hex-(Hex-Hex-)Hex-HexNAc-HexNAc+HexNAc1
					1577	1576	915.441	915.106	3	2742.3	23.09	954.906	RPNQSQPLPPSSLQR	-	No	1	0.75	162.67	0	-1	TRUE	1.51	2-3-1-0-0	0-0-1-0-0	Hex-(Hex-)Hex-HexNAc-HexNAc+DeHex1
					1621	1620	1263.85	1263.52	3	3787.55	23.39	1068.73	FQTVDSSNIDGFVNCTK	-	No	1	0.56	23.09	2.64	-2	TRUE	3.61	3-5-1-1-0	1-0-0-1-0	Hex-Hex-Hex-(Hex-)Hex-HexNAc-(DeHex-)HexNAc+Hex1NeuAc1	Hex-Hex-(Hex-Hex-)Hex-HexNAc-(DeHex-)HexNAc+Hex1NeuAc1
					1629	1620	1093.44	1093.12	3	3276.32	23.44	1120.14	ENGTDTVQEEEESPAEGSK	-	No	1	0.73	79.95	1.13	-1	TRUE	4.4	3-3-1-0-0	0-0-1-0-0	HexNAc-Hex-(Hex-)Hex-HexNAc-HexNAc+DeHex1	Hex-(HexNAc-Hex-)Hex-HexNAc-HexNAc+DeHex1
					1632	1631	668.558	668.307	4	2669.2	23.46	612.535	DLGPTLANSTHHNVR	-	No	1	0.79	56.89	0	-1	TRUE	0.18	2-3-1-0-0	0-0-1-0-0	Hex-(Hex-)Hex-HexNAc-HexNAc+DeHex1
					1634	1631	1006.09	1005.76	3	3014.25	23.48	834.886	LHVTLYNCSFGR	-	No	0	0.9	1.18	1.63	0	TRUE	2.11	3-4-0-1-0	0-0-0-1-0	HexNAc-(Hex-)Hex-(Hex-)Hex-HexNAc-HexNAc+NeuAc1	Hex-HexNAc-Hex-(Hex-)Hex-HexNAc-HexNAc+NeuAc1	HexNAc-Hex-(Hex-Hex-)Hex-HexNAc-HexNAc+NeuAc1
					1660	1653	829.621	829.368	4	3313.44	23.62	713.533	LNQTEPVAGNYYPVNTR	-	No	0	0.89	12.5	3.54	0	TRUE	3.76	2-6-0-0-0	0-1-0-0-0	Hex-Hex-Hex-(Hex-)Hex-HexNAc-HexNAc+HexNAc1	Hex-Hex-(Hex-Hex-)Hex-HexNAc-HexNAc+HexNAc1
					1691	1686	774.831	774.581	4	3094.29	23.82	573.265	NITQIVGHSGCEAK	-	No	1	0.55	36.84	122.32	0	TRUE	1.03	3-6-0-0-0	1-0-0-0-0	Hex-Hex-(Hex-Hex-Hex-)Hex-HexNAc-HexNAc+Hex1	Hex-Hex-Hex-(Hex-Hex-)Hex-HexNAc-HexNAc+Hex1	Hex-Hex-Hex-Hex-(Hex-)Hex-HexNAc-HexNAc+Hex1
					1713	1708	861.152	860.954	5	4299.73	23.96	703.306	ESEQDVEDSQNHTGEPVGDDYKK	-	No	0	0.51	24.76	44.12	0	TRUE	0.68	3-4-1-1-0	0-0-0-1-0	Hex-HexNAc-Hex-(Hex-)Hex-HexNAc-(DeHex-)HexNAc+NeuAc1	HexNAc-(Hex-)Hex-(Hex-)Hex-HexNAc-(DeHex-)HexNAc+NeuAc1	HexNAc-Hex-(Hex-Hex-)Hex-HexNAc-(DeHex-)HexNAc+NeuAc1
					1746	1741	1124.2	1123.87	3	3368.59	24.21	623.34	RPPLAELAALNLSGSR	-	No	0	0.84	7.33	6.19	-3	TRUE	0.87	6-3-0-0-0	3-0-0-0-0	HexNAc-Hex-(Hex-)Hex-HexNAc-HexNAc+Hex3	Hex-(HexNAc-Hex-)Hex-HexNAc-HexNAc+Hex3
					1750	1741	909.649	909.395	4	3633.55	24.23	558.771	VASVININPNTTHSTGSCR	-	No	0	0.76	4.73	100	-3	TRUE	7.66	4-4-1-0-0	1-1-1-0-0	Hex-(HexNAc-Hex-)Hex-HexNAc-HexNAc+Hex1HexNAc1DeHex1	HexNAc-Hex-(Hex-)Hex-HexNAc-HexNAc+Hex1HexNAc1DeHex1
					1753	1752	771.361	771.027	3	2310.06	24.26	492.921	ALSPNSTISSAPK	-	No	0	0.92	0.21	0	0	TRUE	2.22	2-3-1-0-0	0-0-1-0-0	Hex-(Hex-)Hex-HexNAc-HexNAc+DeHex1
					1757	1752	827.378	827.378	4	3305.48	24.28	454.242	ANTTQPGIVEGGQVLK	-	No	0	0.91	2.6	7.11	0	TRUE	4.36	3-4-1-1-0	0-0-1-0-0	NeuAc-Hex-HexNAc-Hex-(Hex-)Hex-HexNAc-HexNAc+DeHex1
					1770	1763	976.084	975.747	3	2924.22	24.37	448.192	NNHTASILDR	-	No	0	0.92	0.25	1.74	0	TRUE	4.68	4-6-0-0-0	0-1-0-0-0	HexNAc-(Hex-HexNAc-)Hex-(Hex-Hex-)Hex-HexNAc-HexNAc+HexNAc1	Hex-HexNAc-Hex-(Hex-HexNAc-Hex-)Hex-HexNAc-HexNAc+HexNAc1	Hex-HexNAc-Hex-(HexNAc-(Hex-)Hex-)Hex-HexNAc-HexNAc+HexNAc1	HexNAc-(Hex-)Hex-(Hex-HexNAc-Hex-)Hex-HexNAc-HexNAc+HexNAc1	HexNAc-(Hex-)Hex-(HexNAc-(Hex-)Hex-)Hex-HexNAc-HexNAc+HexNAc1	HexNAc-(Hex-Hex-)Hex-(HexNAc-Hex-)Hex-HexNAc-HexNAc+HexNAc1	Hex-HexNAc-(Hex-)Hex-(HexNAc-Hex-)Hex-HexNAc-HexNAc+HexNAc1	HexNAc-(HexNAc-)Hex-(Hex-Hex-Hex-)Hex-HexNAc-HexNAc+HexNAc1	HexNAc-(HexNAc-)Hex-(Hex-(Hex-)Hex-)Hex-HexNAc-HexNAc+HexNAc1	Hex-HexNAc-(Hex-HexNAc-)Hex-(Hex-)Hex-HexNAc-HexNAc+HexNAc1	Hex-HexNAc-(HexNAc-)Hex-(Hex-Hex-)Hex-HexNAc-HexNAc+HexNAc1
					1779	1774	803.592	803.093	4	3208.34	24.43	448.192	VVTQNSSSGNVTHEK	-	No	0	0.94	1.45	4.79	-3	TRUE	4.49	4-5-0-0-0	1-2-0-0-0	Hex-(HexNAc-Hex-)Hex-HexNAc-HexNAc+Hex1HexNAc2	HexNAc-Hex-(Hex-)Hex-HexNAc-HexNAc+Hex1HexNAc2
					1827	1818	1142.47	1141.98	2	2281.94	24.74	554.769	GASNLTWR	-	No	0	0.51	73.03	45.87	0	TRUE	3.53	2-6-0-0-0	0-1-0-0-0	Hex-Hex-Hex-(Hex-)Hex-HexNAc-HexNAc+HexNAc1	Hex-Hex-(Hex-Hex-)Hex-HexNAc-HexNAc+HexNAc1
					1834	1829	991.904	991.404	4	3961.59	24.79	606.625	VEDEGNYTCLFVTFPQGSR	-	No	0	0.89	4.28	35.19	0	TRUE	6.47	3-7-0-0-0	0-1-0-0-0	Hex-Hex-(Hex-)Hex-(HexNAc-Hex-)Hex-HexNAc-HexNAc+HexNAc1	Hex-Hex-Hex-(HexNAc-)Hex-(Hex-)Hex-HexNAc-HexNAc+HexNAc1	Hex-Hex-(Hex-HexNAc-)Hex-(Hex-)Hex-HexNAc-HexNAc+HexNAc1	Hex-Hex-(HexNAc-)Hex-(Hex-Hex-)Hex-HexNAc-HexNAc+HexNAc1	HexNAc-(Hex-Hex-)Hex-(Hex-Hex-)Hex-HexNAc-HexNAc+HexNAc1	HexNAc-(Hex-)Hex-(Hex-(Hex-)Hex-)Hex-HexNAc-HexNAc+HexNAc1	HexNAc-(Hex-)Hex-(Hex-Hex-Hex-)Hex-HexNAc-HexNAc+HexNAc1	Hex-HexNAc-Hex-(Hex-(Hex-)Hex-)Hex-HexNAc-HexNAc+HexNAc1	Hex-HexNAc-Hex-(Hex-Hex-Hex-)Hex-HexNAc-HexNAc+HexNAc1	Hex-(Hex-Hex-)Hex-(HexNAc-Hex-)Hex-HexNAc-HexNAc+HexNAc1	Hex-(Hex-)Hex-(Hex-HexNAc-Hex-)Hex-HexNAc-HexNAc+HexNAc1	Hex-Hex-Hex-Hex-(HexNAc-Hex-)Hex-HexNAc-HexNAc+HexNAc1	Hex-Hex-Hex-(HexNAc-(Hex-)Hex-)Hex-HexNAc-HexNAc+HexNAc1	Hex-Hex-Hex-(Hex-HexNAc-Hex-)Hex-HexNAc-HexNAc+HexNAc1	Hex-HexNAc-(Hex-)Hex-(Hex-Hex-)Hex-HexNAc-HexNAc+HexNAc1	Hex-(Hex-)Hex-(HexNAc-(Hex-)Hex-)Hex-HexNAc-HexNAc+HexNAc1	Hex-HexNAc-(Hex-Hex-)Hex-(Hex-)Hex-HexNAc-HexNAc+HexNAc1
					1852	1851	842.365	842.365	3	2524.07	24.92	560.737	ANLTWSVK	-	No	0	0.76	16.95	3.08	0	TRUE	5.32	4-4-1-0-0	1-0-0-0-0	Hex-Hex-(HexNAc-Hex-)Hex-HexNAc-(DeHex-)HexNAc+Hex1
					1863	1862	1006.42	1006.09	3	3015.24	25	451.876	VNETEMDIAK	-	No	0	0.9	0.76	1.45	-3	TRUE	3	6-4-0-0-0	3-0-0-0-0	Hex-Hex-(HexNAc-Hex-)Hex-HexNAc-HexNAc+Hex3
					1871	1862	1326.59	1326.09	2	2650.16	25.05	738.691	ALSPNSTISSAPK	-	No	1	0.88	70.05	34.16	0	TRUE	0.92	2-6-0-0-0	0-1-0-0-0	Hex-Hex-Hex-(Hex-)Hex-HexNAc-HexNAc+HexNAc1	Hex-Hex-(Hex-Hex-)Hex-HexNAc-HexNAc+HexNAc1
					1926	1917	1059.1	1058.43	3	3172.28	25.41	450.726	VINETWAWK	-	No	0	0.67	14.88	59.98	0	TRUE	0.46	2-10-0-0-0	0-1-0-0-0	Hex-Hex-Hex-Hex-(Hex-Hex-Hex-Hex-)Hex-HexNAc-HexNAc+HexNAc1	Hex-Hex-Hex-Hex-Hex-Hex-(Hex-Hex-)Hex-HexNAc-HexNAc+HexNAc1	Hex-Hex-Hex-Hex-Hex-Hex-Hex-(Hex-)Hex-HexNAc-HexNAc+HexNAc1	Hex-Hex-Hex-Hex-Hex-(Hex-Hex-Hex-)Hex-HexNAc-HexNAc+HexNAc1
					1929	1928	723.808	723.309	4	2889.21	25.43	409.271	VWNSTFIEDYR	-	No	0	0.84	3.34	1.4	0	TRUE	2.03	4-4-0-0-0	1-0-0-0-0	Hex-Hex-(HexNAc-Hex-)Hex-HexNAc-HexNAc+Hex1
					1933	1928	1279.55	1279.21	3	3834.61	25.46	909.434	EINSLNLTESHNSR	-	No	1	0.79	22.42	141.91	0	TRUE	6.88	4-6-1-1-0	1-0-0-0-0	NeuAc-Hex-HexNAc-(Hex-)Hex-(Hex-Hex-)Hex-HexNAc-(DeHex-)HexNAc+Hex1	NeuAc-Hex-HexNAc-Hex-(Hex-(Hex-)Hex-)Hex-HexNAc-(DeHex-)HexNAc+Hex1	NeuAc-Hex-HexNAc-Hex-(Hex-Hex-Hex-)Hex-HexNAc-(DeHex-)HexNAc+Hex1
					1940	1939	996.923	996.424	4	3981.67	25.5	612.636	DLGPTLANSTHHNVR	-	No	0	0.89	0.38	3.66	-3	TRUE	3.13	4-5-1-2-0	1-0-0-2-0	Hex-HexNAc-Hex-(Hex-Hex-)Hex-HexNAc-(DeHex-)HexNAc+Hex1NeuAc2	HexNAc-(Hex-)Hex-(Hex-Hex-)Hex-HexNAc-(DeHex-)HexNAc+Hex1NeuAc2
					1959	1950	883.171	882.671	4	3526.65	25.62	878.865	VENGSETGPLPPELQPLLEGEVK	-	No	0	0.72	23.06	0	0	TRUE	0.35	3-3-0-0-0	1-0-0-0-0	Hex-(Hex-)Hex-HexNAc-HexNAc+Hex1
					1962	1961	1004.42	1004.42	3	3010.23	25.64	450.726	VINETWAWK	-	No	0	0.77	11.04	36.78	0	TRUE	2.11	2-9-0-0-0	0-1-0-0-0	Hex-Hex-Hex-Hex-Hex-Hex-(Hex-)Hex-HexNAc-HexNAc+HexNAc1	Hex-Hex-Hex-Hex-Hex-(Hex-Hex-)Hex-HexNAc-HexNAc+HexNAc1	Hex-Hex-Hex-Hex-(Hex-Hex-Hex-)Hex-HexNAc-HexNAc+HexNAc1	Hex-Hex-Hex-(Hex-Hex-Hex-Hex-)Hex-HexNAc-HexNAc+HexNAc1
					1964	1961	790.335	789.835	4	3155.31	25.65	501.565	LGGWNITGPWAK	-	No	0	0.92	7.69	47.7	0	TRUE	8.82	3-5-1-1-0	0-1-0-0-0	NeuAc-Hex-HexNAc-Hex-(Hex-)Hex-HexNAc-(DeHex-)HexNAc+HexNAc1
					1970	1961	1176.9	1176.57	3	3526.68	25.69	1142.82	TNITLVCKPGDLESAPVLR	-	No	1	0.89	67.07	5.76	0	TRUE	4.85	4-3-1-0-0	1-0-0-0-0	DeHex-HexNAc-Hex-(Hex-)Hex-HexNAc-HexNAc+Hex1
					1990	1983	716.322	715.823	4	2859.26	25.81	492.921	QEAKENGTNLTFIGDK	-	No	0	0.95	3.64	0	0	TRUE	4.27	3-3-0-0-0	1-0-0-0-0	Hex-(Hex-)Hex-HexNAc-HexNAc+Hex1
					1995	1994	889.4	889.066	3	2664.18	25.84	683.509	EIFVANGTQGK	-	No	0	0.85	18.22	1.89	-2	TRUE	6.69	5-3-0-0-0	2-0-0-0-0	HexNAc-Hex-(Hex-)Hex-HexNAc-HexNAc+Hex2	Hex-(HexNAc-Hex-)Hex-HexNAc-HexNAc+Hex2
					2006	2005	737.348	737.098	4	2944.36	25.9	684.815	LSHDANETLPLHLYVK	-	No	0	0.55	47.3	0	0	TRUE	4.06	3-3-0-0-0	1-0-0-0-0	Hex-(Hex-)Hex-HexNAc-HexNAc+Hex1
					2008	2005	1425.59	1425.09	2	2848.17	25.92	561.789	ANLTWSVK	-	No	0	0.96	0.43	23.92	0	TRUE	9	4-6-1-0-0	0-1-0-0-0	HexNAc-(Hex-)Hex-(Hex-HexNAc-Hex-)Hex-HexNAc-(DeHex-)HexNAc+HexNAc1	HexNAc-(Hex-)Hex-(HexNAc-(Hex-)Hex-)Hex-HexNAc-(DeHex-)HexNAc+HexNAc1	HexNAc-(Hex-Hex-)Hex-(HexNAc-Hex-)Hex-HexNAc-(DeHex-)HexNAc+HexNAc1	Hex-HexNAc-(Hex-)Hex-(HexNAc-Hex-)Hex-HexNAc-(DeHex-)HexNAc+HexNAc1	HexNAc-(HexNAc-)Hex-(Hex-Hex-Hex-)Hex-HexNAc-(DeHex-)HexNAc+HexNAc1	HexNAc-(HexNAc-)Hex-(Hex-(Hex-)Hex-)Hex-HexNAc-(DeHex-)HexNAc+HexNAc1	HexNAc-(Hex-HexNAc-)Hex-(Hex-Hex-)Hex-HexNAc-(DeHex-)HexNAc+HexNAc1	Hex-HexNAc-(HexNAc-)Hex-(Hex-Hex-)Hex-HexNAc-(DeHex-)HexNAc+HexNAc1	Hex-HexNAc-(Hex-HexNAc-)Hex-(Hex-)Hex-HexNAc-(DeHex-)HexNAc+HexNAc1	Hex-HexNAc-Hex-(Hex-HexNAc-Hex-)Hex-HexNAc-(DeHex-)HexNAc+HexNAc1	Hex-HexNAc-Hex-(HexNAc-(Hex-)Hex-)Hex-HexNAc-(DeHex-)HexNAc+HexNAc1
					2023	2016	922.895	922.394	4	3685.55	26.01	659.056	FTFTSHTPGEHQICLHSNSTK	-	No	0	0.98	10.96	0.63	0	TRUE	9.87	3-4-0-0-0	1-0-0-0-0	Hex-(Hex-Hex-)Hex-HexNAc-HexNAc+Hex1	Hex-Hex-(Hex-)Hex-HexNAc-HexNAc+Hex1
					2047	2038	1234.04	1233.54	2	2465.07	26.16	565.029	LLNINPNK	-	No	1	0.61	45.05	27.85	0	TRUE	0.99	2-7-0-0-0	0-1-0-0-0	Hex-Hex-Hex-Hex-(Hex-)Hex-HexNAc-HexNAc+HexNAc1	Hex-Hex-Hex-(Hex-Hex-)Hex-HexNAc-HexNAc+HexNAc1	Hex-Hex-(Hex-Hex-Hex-)Hex-HexNAc-HexNAc+HexNAc1
					2054	2049	840.347	839.748	5	4193.7	26.21	455.221	EINSLNLTESHNSR	-	No	0	0.96	0.56	23.49	-3	TRUE	11.06	8-5-1-0-0	3-0-0-0-0	Hex-HexNAc-(Hex-)Hex-(HexNAc-(HexNAc-)Hex-)Hex-HexNAc-(DeHex-)HexNAc+Hex3	Hex-Hex-(HexNAc-)Hex-(HexNAc-(HexNAc-)Hex-)Hex-HexNAc-(DeHex-)HexNAc+Hex3	Hex-HexNAc-Hex-HexNAc-(HexNAc-)Hex-(Hex-)Hex-HexNAc-(DeHex-)HexNAc+Hex3	HexNAc-Hex-HexNAc-(Hex-HexNAc-)Hex-(Hex-)Hex-HexNAc-(DeHex-)HexNAc+Hex3	HexNAc-Hex-HexNAc-(HexNAc-)Hex-(Hex-Hex-)Hex-HexNAc-(DeHex-)HexNAc+Hex3	Hex-HexNAc-(HexNAc-)Hex-(HexNAc-(Hex-)Hex-)Hex-HexNAc-(DeHex-)HexNAc+Hex3	HexNAc-Hex-HexNAc-(Hex-)Hex-(HexNAc-Hex-)Hex-HexNAc-(DeHex-)HexNAc+Hex3	Hex-HexNAc-(Hex-HexNAc-)Hex-(HexNAc-Hex-)Hex-HexNAc-(DeHex-)HexNAc+Hex3	Hex-HexNAc-(HexNAc-)Hex-(Hex-(HexNAc-)Hex-)Hex-HexNAc-(DeHex-)HexNAc+Hex3	Hex-HexNAc-(HexNAc-)Hex-(Hex-HexNAc-Hex-)Hex-HexNAc-(DeHex-)HexNAc+Hex3	HexNAc-Hex-HexNAc-Hex-(HexNAc-(Hex-)Hex-)Hex-HexNAc-(DeHex-)HexNAc+Hex3	Hex-HexNAc-Hex-HexNAc-Hex-(HexNAc-Hex-)Hex-HexNAc-(DeHex-)HexNAc+Hex3	HexNAc-Hex-HexNAc-Hex-(Hex-HexNAc-Hex-)Hex-HexNAc-(DeHex-)HexNAc+Hex3
					2067	2060	1153.02	1152.52	2	2303.03	26.28	1128.76	LLNINPNK	-	No	1	0.74	105.6	0.2	-2	TRUE	3.39	2-6-0-0-0	0-2-0-0-0	Hex-Hex-(Hex-)Hex-HexNAc-HexNAc+HexNAc2	Hex-(Hex-Hex-)Hex-HexNAc-HexNAc+HexNAc2
					2085	2082	860.593	860.192	5	4295.93	26.4	811.384	VADPVDSSNLDTCGSISQVIEQLPQPNR	-	No	0	0.81	9.22	1.57	0	TRUE	2.16	3-4-0-0-0	0-1-0-0-0	HexNAc-Hex-(Hex-)Hex-HexNAc-HexNAc+HexNAc1	Hex-(HexNAc-Hex-)Hex-HexNAc-HexNAc+HexNAc1
					2109	2104	846.7	846.7	3	2537.08	26.55	681.351	GHTLTLNFTR	-	No	0	0.95	1.44	0.67	0	TRUE	6.35	2-6-0-0-0	0-1-0-0-0	Hex-Hex-Hex-(Hex-)Hex-HexNAc-HexNAc+HexNAc1	Hex-Hex-(Hex-Hex-)Hex-HexNAc-HexNAc+HexNAc1
					2124	2115	941.062	940.731	3	2819.17	26.65	661.294	VQPFNVTQGK	-	No	1	0.97	95.2	55.05	0	TRUE	2.17	2-8-0-0-0	0-1-0-0-0	Hex-Hex-Hex-Hex-Hex-(Hex-)Hex-HexNAc-HexNAc+HexNAc1	Hex-Hex-Hex-Hex-(Hex-Hex-)Hex-HexNAc-HexNAc+HexNAc1	Hex-Hex-Hex-(Hex-Hex-Hex-)Hex-HexNAc-HexNAc+HexNAc1
					2144	2137	899.369	899.369	3	2695.09	26.78	760.397	SPVQENSSDLNK	-	No	0	0.7	5.77	100.97	0	TRUE	4.62	2-6-0-0-0	0-1-0-0-0	Hex-Hex-Hex-(Hex-)Hex-HexNAc-HexNAc+HexNAc1	Hex-Hex-(Hex-Hex-)Hex-HexNAc-HexNAc+HexNAc1
					2179	2170	904.386	904.054	3	2709.14	27.01	625.309	EFGFAWPESLNCSK	-	No	0	0.97	7.27	0	0	TRUE	7.84	2-3-1-0-0	0-0-1-0-0	Hex-(Hex-)Hex-HexNAc-HexNAc+DeHex1
					2197	2192	778.68	778.68	3	2333.02	27.13	441.227	VQPFNVTQGK	-	No	0	0.86	2.76	3.16	0	TRUE	0.52	2-5-0-0-0	0-1-0-0-0	Hex-Hex-(Hex-)Hex-HexNAc-HexNAc+HexNAc1	Hex-(Hex-Hex-)Hex-HexNAc-HexNAc+HexNAc1
					2199	2192	1283.06	1282.56	2	2563.1	27.14	520.781	NTTIFLK	-	No	1	0.54	12.27	124.88	0	TRUE	0.57	3-6-1-0-0	0-1-0-0-0	HexNAc-Hex-(Hex-Hex-Hex-)Hex-HexNAc-(DeHex-)HexNAc+HexNAc1	Hex-HexNAc-Hex-(Hex-Hex-)Hex-HexNAc-(DeHex-)HexNAc+HexNAc1	HexNAc-(Hex-)Hex-(Hex-Hex-)Hex-HexNAc-(DeHex-)HexNAc+HexNAc1	HexNAc-(Hex-Hex-)Hex-(Hex-)Hex-HexNAc-(DeHex-)HexNAc+HexNAc1	Hex-HexNAc-(Hex-)Hex-(Hex-)Hex-HexNAc-(DeHex-)HexNAc+HexNAc1	HexNAc-Hex-(Hex-(Hex-)Hex-)Hex-HexNAc-(DeHex-)HexNAc+HexNAc1
					2201	2192	874.388	874.048	3	2619.12	27.15	455.221	GHTLTLNFTR	-	No	0	0.98	33.96	0	-3	TRUE	9.6	4-4-0-0-0	2-1-0-0-0	Hex-(Hex-)Hex-HexNAc-HexNAc+Hex2HexNAc1
					2256	2247	1149.83	1149.49	3	3445.45	27.5	641.64	INTTADEKDPTNPFR	-	No	0	0.78	4.25	40.76	0	TRUE	1.56	3-6-1-0-0	0-1-0-0-0	Hex-(Hex-)Hex-(HexNAc-Hex-)Hex-HexNAc-(DeHex-)HexNAc+HexNAc1	Hex-Hex-Hex-(HexNAc-Hex-)Hex-HexNAc-(DeHex-)HexNAc+HexNAc1	Hex-Hex-(HexNAc-(Hex-)Hex-)Hex-HexNAc-(DeHex-)HexNAc+HexNAc1	Hex-Hex-(Hex-HexNAc-Hex-)Hex-HexNAc-(DeHex-)HexNAc+HexNAc1
					2259	2258	920.938	920.938	2	1839.86	27.52	1005.56	SNISILR	-	No	0	0.97	2.6	0	0	TRUE	7.7	2-3-1-0-0	0-0-1-0-0	Hex-(Hex-)Hex-HexNAc-HexNAc+DeHex1
					2283	2280	770.323	769.988	3	2306.94	27.68	554.356	GASNLTWR	-	No	1	0.5	48.55	0.91	0	TRUE	11.01	3-4-1-0-0	0-0-1-0-0	Hex-Hex-(HexNAc-Hex-)Hex-HexNAc-HexNAc+DeHex1
					2296	2291	1068.45	1067.44	3	3199.31	27.76	744.693	LFQNCSELFK	-	No	1	0.73	21.81	45.27	0	TRUE	1.53	4-5-2-0-0	0-0-1-0-0	Hex-(HexNAc-)Hex-(Hex-HexNAc-Hex-)Hex-HexNAc-(DeHex-)HexNAc+DeHex1	Hex-(HexNAc-)Hex-(HexNAc-(Hex-)Hex-)Hex-HexNAc-(DeHex-)HexNAc+DeHex1	HexNAc-(HexNAc-)Hex-(Hex-Hex-Hex-)Hex-HexNAc-(DeHex-)HexNAc+DeHex1	HexNAc-(HexNAc-)Hex-(Hex-(Hex-)Hex-)Hex-HexNAc-(DeHex-)HexNAc+DeHex1	Hex-HexNAc-Hex-(Hex-HexNAc-Hex-)Hex-HexNAc-(DeHex-)HexNAc+DeHex1	Hex-HexNAc-Hex-(HexNAc-(Hex-)Hex-)Hex-HexNAc-(DeHex-)HexNAc+DeHex1	Hex-HexNAc-Hex-HexNAc-Hex-(Hex-)Hex-HexNAc-(DeHex-)HexNAc+DeHex1	Hex-HexNAc-(HexNAc-)Hex-(Hex-Hex-)Hex-HexNAc-(DeHex-)HexNAc+DeHex1	Hex-HexNAc-(Hex-HexNAc-)Hex-(Hex-)Hex-HexNAc-(DeHex-)HexNAc+DeHex1	HexNAc-(Hex-)Hex-(Hex-HexNAc-Hex-)Hex-HexNAc-(DeHex-)HexNAc+DeHex1	HexNAc-(Hex-)Hex-(HexNAc-(Hex-)Hex-)Hex-HexNAc-(DeHex-)HexNAc+DeHex1
					2298	2291	952.091	951.764	3	2852.27	27.77	600.633	EAGNHTSGAGLVQINK	-	No	0	0.89	4.91	10.49	0	TRUE	2.82	3-4-0-0-0	0-1-0-0-0	HexNAc-Hex-(Hex-)Hex-HexNAc-HexNAc+HexNAc1	Hex-(HexNAc-Hex-)Hex-HexNAc-HexNAc+HexNAc1
					2303	2302	664.546	664.297	4	2653.16	27.81	350.186	VFGSQNLTTVK	-	No	0	0.96	1.77	7.64	0	TRUE	7.36	4-4-0-0-0	1-0-0-0-0	Hex-Hex-(HexNAc-Hex-)Hex-HexNAc-HexNAc+Hex1
					2322	2313	728.336	728.336	3	2181.99	27.92	376.426	LLNINPNK	-	No	0	0.89	4.17	7.2	0	TRUE	2.24	3-4-0-0-0	0-1-0-0-0	HexNAc-Hex-(Hex-)Hex-HexNAc-HexNAc+HexNAc1	Hex-(HexNAc-Hex-)Hex-HexNAc-HexNAc+HexNAc1
					2338	2335	898.078	897.742	3	2690.2	28.03	600.633	EAGNHTSGAGLVQINK	-	No	0	0.93	11.73	0	-3	TRUE	2.27	3-3-0-0-0	1-0-0-0-0	Hex-(Hex-)Hex-HexNAc-HexNAc+Hex1
					2342	2335	1078.5	1078.5	2	2154.98	28.06	661.308	VQPFNVTQGK	-	No	0	0.54	146.3	0	0	TRUE	3.17	2-3-1-0-0	0-0-1-0-0	Hex-(Hex-)Hex-HexNAc-HexNAc+DeHex1
					2362	2357	973.462	972.79	3	2915.35	28.19	938.913	TQNFTLLVQGSPELK	-	No	0	0.8	9.59	0.15	0	TRUE	4.61	3-3-1-0-0	0-0-1-0-0	HexNAc-Hex-(Hex-)Hex-HexNAc-HexNAc+DeHex1	Hex-(HexNAc-Hex-)Hex-HexNAc-HexNAc+DeHex1
					2369	2368	900.05	899.716	3	2696.12	28.24	508.25	LFNVTPQDEQK	-	No	0	0.88	4.17	34.54	0	TRUE	5.61	2-6-0-0-0	0-1-0-0-0	Hex-Hex-Hex-(Hex-)Hex-HexNAc-HexNAc+HexNAc1	Hex-Hex-(Hex-Hex-)Hex-HexNAc-HexNAc+HexNAc1
					2417	2412	1084.5	1084	2	2165.98	28.54	565.31	LLNINPNK	-	No	0	0.97	1.22	0.11	0	TRUE	8	3-3-1-0-0	0-0-1-0-0	HexNAc-Hex-(Hex-)Hex-HexNAc-HexNAc+DeHex1	Hex-(HexNAc-Hex-)Hex-HexNAc-HexNAc+DeHex1
					2419	2412	1049.98	1049.48	2	2096.96	28.55	631.988	NITDLVEGAK	-	No	0	0.98	0.36	0	0	TRUE	8.03	2-3-1-0-0	0-0-1-0-0	Hex-(Hex-)Hex-HexNAc-HexNAc+DeHex1
					2424	2423	979.745	979.413	3	2935.22	28.58	525.235	DPQGWVAGNLSAR	-	No	0	0.97	0.25	0.54	0	TRUE	7.9	3-5-1-0-0	1-0-0-0-0	Hex-Hex-Hex-(Hex-)Hex-HexNAc-(DeHex-)HexNAc+Hex1	Hex-Hex-(Hex-Hex-)Hex-HexNAc-(DeHex-)HexNAc+Hex1
					2430	2423	1254.93	1254.26	3	3759.76	28.62	854.19	LLIAGTNSSDLQQILSLLESNK	-	No	0	0.98	2	1.37	0	TRUE	10.26	3-4-1-0-0	0-1-0-0-0	HexNAc-Hex-(Hex-)Hex-HexNAc-(DeHex-)HexNAc+HexNAc1	Hex-(HexNAc-Hex-)Hex-HexNAc-(DeHex-)HexNAc+HexNAc1
					2505	2500	690.093	689.694	5	3443.44	29.12	405.693	WGHNITEFQQR	-	No	0	0.9	3.51	7.54	-2	TRUE	4.89	6-5-0-0-0	0-2-0-0-0	HexNAc-(HexNAc-)Hex-(HexNAc-(HexNAc-)Hex-)Hex-HexNAc-HexNAc+HexNAc2
					2518	2511	865.136	864.63	4	3454.49	29.2	719.842	YQTLNCSVNVNCVNIR	-	No	0	0.87	5.92	0	-3	TRUE	1.98	5-3-0-0-0	3-0-0-0-0	Hex-(Hex-)Hex-HexNAc-HexNAc+Hex3
					2525	2522	766.333	765.999	3	2294.97	29.25	468.881	FSADLGYNGTR	-	No	0	0.98	4.32	0	0	TRUE	8.94	3-3-0-0-0	1-0-0-0-0	Hex-(Hex-)Hex-HexNAc-HexNAc+Hex1
					2584	2577	1279.29	1278.53	4	5110.09	29.62	909.43	LANDTLIYFTSDQGAHVEEVSSK	-	No	0	0.88	26.06	208.14	-2	TRUE	6.21	5-7-1-1-0	1-1-0-0-0	NeuAc-Hex-HexNAc-(Hex-)Hex-(Hex-(DeHex-HexNAc-)Hex-)Hex-HexNAc-HexNAc+Hex1HexNAc1	NeuAc-Hex-HexNAc-(Hex-(DeHex-)HexNAc-)Hex-(Hex-Hex-)Hex-HexNAc-HexNAc+Hex1HexNAc1
					2591	2588	781.604	781.348	4	3121.36	29.67	641.64	INTTADEKDPTNPFR	-	No	0	0.83	48.38	3.32	0	TRUE	7.27	3-4-1-0-0	0-0-1-0-0	HexNAc-(Hex-)Hex-(Hex-)Hex-HexNAc-HexNAc+DeHex1	Hex-HexNAc-Hex-(Hex-)Hex-HexNAc-HexNAc+DeHex1	HexNAc-Hex-(Hex-Hex-)Hex-HexNAc-HexNAc+DeHex1
					2611	2610	808.772	808.57	5	4037.81	29.8	659.317	VENGSETGPLPPELQPLLEGEVK	-	No	0	0.93	46.49	0	-3	TRUE	8.22	4-4-1-0-0	2-1-0-0-0	Hex-(Hex-)Hex-HexNAc-(DeHex-)HexNAc+Hex2HexNAc1
					2613	2610	1005.75	1005.08	3	3012.22	29.81	556.927	EASIVGENETYPR	-	No	0	0.92	4.09	9.72	-2	TRUE	4.86	3-4-0-1-0	1-0-0-1-0	Hex-Hex-(Hex-)Hex-HexNAc-HexNAc+Hex1NeuAc1	Hex-(Hex-Hex-)Hex-HexNAc-HexNAc+Hex1NeuAc1
					2626	2621	1238.53	1238.29	4	4949.11	29.89	909.43	LANDTLIYFTSDQGAHVEEVSSK	-	No	0	0.59	25.52	302.91	0	TRUE	3.85	5-6-3-0-0	1-0-0-0-0	DeHex-HexNAc-Hex-(DeHex-)HexNAc-(Hex-Hex-)Hex-(Hex-)Hex-HexNAc-(DeHex-)HexNAc+Hex1	DeHex-HexNAc-Hex-(DeHex-)HexNAc-(Hex-)Hex-(Hex-Hex-)Hex-HexNAc-(DeHex-)HexNAc+Hex1	Hex-(DeHex-)HexNAc-(Hex-Hex-)Hex-(DeHex-HexNAc-Hex-)Hex-HexNAc-(DeHex-)HexNAc+Hex1	Hex-(DeHex-)HexNAc-(Hex-)Hex-(DeHex-HexNAc-(Hex-)Hex-)Hex-HexNAc-(DeHex-)HexNAc+Hex1	DeHex-HexNAc-Hex-Hex-(DeHex-HexNAc-)Hex-(Hex-Hex-)Hex-HexNAc-(DeHex-)HexNAc+Hex1	Hex-Hex-Hex-(DeHex-HexNAc-)Hex-(DeHex-HexNAc-Hex-)Hex-HexNAc-(DeHex-)HexNAc+Hex1	Hex-Hex-(DeHex-HexNAc-)Hex-(DeHex-HexNAc-(Hex-)Hex-)Hex-HexNAc-(DeHex-)HexNAc+Hex1	DeHex-HexNAc-Hex-(DeHex-)HexNAc-Hex-(Hex-(Hex-)Hex-)Hex-HexNAc-(DeHex-)HexNAc+Hex1	DeHex-HexNAc-Hex-(DeHex-)HexNAc-Hex-(Hex-Hex-Hex-)Hex-HexNAc-(DeHex-)HexNAc+Hex1	DeHex-HexNAc-Hex-Hex-(Hex-)Hex-(DeHex-HexNAc-Hex-)Hex-HexNAc-(DeHex-)HexNAc+Hex1	DeHex-HexNAc-Hex-Hex-Hex-(DeHex-HexNAc-(Hex-)Hex-)Hex-HexNAc-(DeHex-)HexNAc+Hex1
					2666	2665	707.001	706.667	3	2116.98	30.15	355.535	IYIPLNK	-	No	0	0.95	0.36	0.33	0	TRUE	5.42	3-4-0-0-0	0-1-0-0-0	HexNAc-Hex-(Hex-)Hex-HexNAc-HexNAc+HexNAc1	Hex-(HexNAc-Hex-)Hex-HexNAc-HexNAc+HexNAc1
					2674	2665	1499.31	1498.98	3	4493.92	30.2	954.997	RPNQSQPLPPSSLQR	-	No	0	0.62	3.35	170.03	-3	TRUE	0.33	6-7-1-1-0	1-1-1-0-0	NeuAc-Hex-HexNAc-Hex-(HexNAc-Hex-Hex-(HexNAc-)Hex-)Hex-HexNAc-HexNAc+Hex1HexNAc1DeHex1	NeuAc-Hex-HexNAc-Hex-(HexNAc-Hex-HexNAc-(Hex-)Hex-)Hex-HexNAc-HexNAc+Hex1HexNAc1DeHex1
					2685	2676	800.359	800.023	3	2397.05	30.26	386.442	NTTSYVLR	-	No	0	0.94	2	2.73	0	TRUE	5.5	4-3-1-0-0	1-0-0-0-0	DeHex-HexNAc-Hex-(Hex-)Hex-HexNAc-HexNAc+Hex1
					2688	2687	711.076	710.824	4	2839.27	30.28	547.259	SLVTQYLNATGNR	-	No	0	0.95	7.21	21.42	0	TRUE	4.99	3-4-1-0-0	1-0-0-0-0	Hex-(Hex-Hex-)Hex-HexNAc-(DeHex-)HexNAc+Hex1	Hex-Hex-(Hex-)Hex-HexNAc-(DeHex-)HexNAc+Hex1
					2718	2709	1065.5	1065.5	3	3193.47	30.48	713.533	DFEDLYTPVNGSIVIVR	-	No	0	0.94	4.1	0	-2	TRUE	4.28	3-4-0-0-0	1-1-0-0-0	Hex-(Hex-)Hex-HexNAc-HexNAc+Hex1HexNAc1
					2721	2720	713.298	713.05	4	2848.17	30.5	536.918	SWPAVGNCSSALR	-	No	0	0.98	7.96	4.34	0	TRUE	10.71	4-3-1-0-0	0-0-1-0-0	HexNAc-(HexNAc-)Hex-(Hex-)Hex-HexNAc-HexNAc+DeHex1	HexNAc-Hex-(HexNAc-Hex-)Hex-HexNAc-HexNAc+DeHex1
					2723	2720	726.66	725.99	3	2174.95	30.52	561.789	ANLTWSVK	-	No	0	0.86	3.67	0.64	0	TRUE	0.56	3-4-0-0-0	0-1-0-0-0	HexNAc-Hex-(Hex-)Hex-HexNAc-HexNAc+HexNAc1	Hex-(HexNAc-Hex-)Hex-HexNAc-HexNAc+HexNAc1
					2732	2731	696.81	696.308	4	2781.2	30.57	376.426	LLNINPNK	-	No	0	0.9	1.69	1.27	-3	TRUE	2.37	3-5-1-1-0	1-0-1-1-0	Hex-Hex-Hex-(Hex-)Hex-HexNAc-HexNAc+Hex1DeHex1NeuAc1	Hex-Hex-(Hex-Hex-)Hex-HexNAc-HexNAc+Hex1DeHex1NeuAc1
					2760	2753	1148.45	1148.12	3	3441.34	30.75	540.588	WGHNITEFQQR	-	No	0	0.88	3.95	209.76	0	TRUE	8.44	2-10-0-0-0	0-1-0-0-0	Hex-Hex-Hex-Hex-(Hex-Hex-Hex-Hex-)Hex-HexNAc-HexNAc+HexNAc1	Hex-Hex-Hex-Hex-Hex-Hex-(Hex-Hex-)Hex-HexNAc-HexNAc+HexNAc1	Hex-Hex-Hex-Hex-Hex-Hex-Hex-(Hex-)Hex-HexNAc-HexNAc+HexNAc1	Hex-Hex-Hex-Hex-Hex-(Hex-Hex-Hex-)Hex-HexNAc-HexNAc+HexNAc1
					2773	2764	1396.61	1396.27	3	4185.78	30.84	1149.55	NPVGLIGAENATGETDPSHSK	-	No	0	0.82	5.68	233.96	-2	TRUE	5.6	4-7-1-0-0	1-0-1-0-0	HexNAc-Hex-Hex-Hex-(Hex-(Hex-)Hex-)Hex-HexNAc-HexNAc+Hex1DeHex1	Hex-HexNAc-Hex-Hex-Hex-(Hex-Hex-)Hex-HexNAc-HexNAc+Hex1DeHex1	HexNAc-Hex-Hex-(Hex-)Hex-(Hex-Hex-)Hex-HexNAc-HexNAc+Hex1DeHex1	Hex-Hex-Hex-Hex-(HexNAc-(Hex-)Hex-)Hex-HexNAc-HexNAc+Hex1DeHex1	Hex-Hex-Hex-(Hex-)Hex-(HexNAc-Hex-)Hex-HexNAc-HexNAc+Hex1DeHex1	Hex-Hex-Hex-Hex-(Hex-HexNAc-Hex-)Hex-HexNAc-HexNAc+Hex1DeHex1
					2780	2775	984.695	984.198	4	3932.76	30.88	535.762	DFEDLYTPVNGSIVIVR	-	No	0	0.9	1.81	14.32	-3	TRUE	2.17	6-3-2-0-0	2-0-1-0-0	HexNAc-(HexNAc-)Hex-(Hex-)Hex-HexNAc-(DeHex-)HexNAc+Hex2DeHex1	HexNAc-Hex-(HexNAc-Hex-)Hex-HexNAc-(DeHex-)HexNAc+Hex2DeHex1
					2782	2775	839.715	839.382	3	2515.12	30.89	501.565	LGGWNITGPWAK	-	No	0	0.96	0.57	0.61	0	TRUE	6.79	2-5-0-0-0	0-1-0-0-0	Hex-Hex-(Hex-)Hex-HexNAc-HexNAc+HexNAc1	Hex-(Hex-Hex-)Hex-HexNAc-HexNAc+HexNAc1
					2791	2786	846.706	846.371	3	2536.09	30.95	378.869	NISQVLEK	-	No	0	0.97	1.01	0	-3	TRUE	6.45	4-4-1-0-0	2-1-0-0-0	Hex-(Hex-)Hex-HexNAc-(DeHex-)HexNAc+Hex2HexNAc1
					2809	2808	676.799	676.55	4	2702.17	31.08	376.426	LGGWNITGPWAK	-	No	0	0.97	0.27	0.52	0	TRUE	7.5	3-4-1-0-0	0-1-0-0-0	HexNAc-Hex-(Hex-)Hex-HexNAc-(DeHex-)HexNAc+HexNAc1	Hex-(HexNAc-Hex-)Hex-HexNAc-(DeHex-)HexNAc+HexNAc1
					2813	2808	902.401	901.728	3	2702.16	31.11	751.844	LGGWNITGPWAK	-	No	0	0.98	1.39	0.13	0	TRUE	10.39	3-4-1-0-0	0-1-0-0-0	DeHex-HexNAc-Hex-(Hex-)Hex-HexNAc-HexNAc+HexNAc1
					2815	2808	929.907	929.405	4	3713.59	31.12	684.815	LSHDANETLPLHLYVK	-	No	0	0.95	25.43	8.37	0	TRUE	6.11	2-9-0-0-0	0-1-0-0-0	Hex-Hex-Hex-(Hex-Hex-Hex-Hex-)Hex-HexNAc-HexNAc+HexNAc1	Hex-Hex-Hex-Hex-Hex-Hex-(Hex-)Hex-HexNAc-HexNAc+HexNAc1	Hex-Hex-Hex-Hex-(Hex-Hex-Hex-)Hex-HexNAc-HexNAc+HexNAc1	Hex-Hex-Hex-Hex-Hex-(Hex-Hex-)Hex-HexNAc-HexNAc+HexNAc1
					2839	2830	1060.13	1059.81	3	3176.4	31.28	605.656	ANTTQPGIVEGGQVLK	-	No	0	0.92	2.06	46.88	0	TRUE	8.76	3-5-1-0-0	0-1-0-0-0	Hex-Hex-(DeHex-HexNAc-Hex-)Hex-HexNAc-HexNAc+HexNAc1
					2888	2885	1193.88	1193.55	3	3577.62	31.59	691.562	VLHNGTLAELQGLPHIR	-	No	0	0.96	1.61	8.08	0	TRUE	8.19	3-5-0-1-0	0-0-0-1-0	HexNAc-Hex-(Hex-Hex-Hex-)Hex-HexNAc-HexNAc+NeuAc1	HexNAc-Hex-(Hex-(Hex-)Hex-)Hex-HexNAc-HexNAc+NeuAc1	Hex-HexNAc-Hex-(Hex-Hex-)Hex-HexNAc-HexNAc+NeuAc1	HexNAc-(Hex-)Hex-(Hex-Hex-)Hex-HexNAc-HexNAc+NeuAc1	Hex-HexNAc-(Hex-)Hex-(Hex-)Hex-HexNAc-HexNAc+NeuAc1	HexNAc-(Hex-Hex-)Hex-(Hex-)Hex-HexNAc-HexNAc+NeuAc1
					2890	2885	1164.19	1163.51	3	3487.49	31.6	744.693	VASVININPNTTHSTGSCR	-	No	0	0.87	3.72	63.1	0	TRUE	7.98	4-4-0-0-0	1-0-0-0-0	HexNAc-Hex-(Hex-Hex-)Hex-HexNAc-HexNAc+Hex1	Hex-HexNAc-Hex-(Hex-)Hex-HexNAc-HexNAc+Hex1	HexNAc-(Hex-)Hex-(Hex-)Hex-HexNAc-HexNAc+Hex1
					2897	2896	825.115	824.863	4	3295.42	31.65	501.565	LGGWNITGPWAK	-	No	0	0.9	0.9	4.34	-3	TRUE	3.19	6-3-2-0-0	1-0-2-0-0	HexNAc-Hex-(HexNAc-(HexNAc-)Hex-)Hex-HexNAc-HexNAc+Hex1DeHex2	HexNAc-(HexNAc-)Hex-(HexNAc-Hex-)Hex-HexNAc-HexNAc+Hex1DeHex2
					2899	2896	895.914	895.411	4	3577.61	31.66	623.34	RPPLAELAALNLSGSR	-	No	0	0.68	3.57	86.75	-3	TRUE	2.46	4-5-0-1-0	2-0-0-1-0	Hex-Hex-(Hex-Hex-)Hex-HexNAc-HexNAc+Hex2NeuAc1	Hex-Hex-Hex-(Hex-)Hex-HexNAc-HexNAc+Hex2NeuAc1
					2927	2918	1141.48	1141.14	3	3420.41	31.85	961.782	INTTADEKDPTNPFR	-	No	1	0.86	158.62	54.22	0	TRUE	1.28	2-8-0-0-0	0-1-0-0-0	Hex-Hex-Hex-Hex-Hex-(Hex-)Hex-HexNAc-HexNAc+HexNAc1	Hex-Hex-Hex-Hex-(Hex-Hex-)Hex-HexNAc-HexNAc+HexNAc1	Hex-Hex-Hex-(Hex-Hex-Hex-)Hex-HexNAc-HexNAc+HexNAc1
					2936	2929	1090.83	1090.5	3	3268.48	31.91	684.815	LSHDANETLPLHLYVK	-	No	0	0.81	3.38	4.06	0	TRUE	0.22	3-5-0-0-0	0-1-0-0-0	Hex-Hex-(HexNAc-Hex-)Hex-HexNAc-HexNAc+HexNAc1
					2949	2940	1023.47	1022.8	3	3065.38	31.99	684.815	LSHDANETLPLHLYVK	-	No	0	0.97	20.25	1.75	0	TRUE	7.73	2-5-0-0-0	0-1-0-0-0	Hex-Hex-(Hex-)Hex-HexNAc-HexNAc+HexNAc1	Hex-(Hex-Hex-)Hex-HexNAc-HexNAc+HexNAc1
					2998	2995	791.342	791.342	3	2371	32.32	761.646	SPVQENSSDLNK	-	No	0	0.93	2.16	0	0	TRUE	4.22	2-4-0-0-0	0-1-0-0-0	Hex-(Hex-)Hex-HexNAc-HexNAc+HexNAc1
					3004	2995	1177.52	1177.17	3	3528.5	32.36	1020.28	EGSGYFFLNTSTADVVK	-	No	1	0.51	26.92	12.43	-2	TRUE	3.67	3-4-1-1-0	0-0-1-1-0	Hex-Hex-(HexNAc-Hex-)Hex-HexNAc-HexNAc+DeHex1NeuAc1
					3013	3006	1040.43	1040.1	3	3117.27	32.41	810.264	WGHNITEFQQR	-	No	1	0.88	271.75	179.23	0	TRUE	3.84	2-8-0-0-0	0-1-0-0-0	Hex-Hex-Hex-Hex-Hex-(Hex-)Hex-HexNAc-HexNAc+HexNAc1	Hex-Hex-Hex-Hex-(Hex-Hex-)Hex-HexNAc-HexNAc+HexNAc1	Hex-Hex-Hex-(Hex-Hex-Hex-)Hex-HexNAc-HexNAc+HexNAc1
					3015	3006	873.142	872.892	4	3487.54	32.43	744.693	VASVININPNTTHSTGSCR	-	No	0	0.88	7.39	16.58	0	TRUE	4.9	4-4-0-0-0	1-0-0-0-0	Hex-Hex-(HexNAc-Hex-)Hex-HexNAc-HexNAc+Hex1
					3020	3017	745.009	744.675	3	2231	32.46	447.559	ENVGIYNLSK	-	No	1	0.99	107.17	0	0	TRUE	5.58	3-3-0-0-0	1-0-0-0-0	Hex-(Hex-)Hex-HexNAc-HexNAc+Hex1
					3035	3028	994.448	993.955	4	3971.79	32.56	659.317	VENGSETGPLPPELQPLLEGEVK	-	No	0	0.86	5.23	3.12	-3	TRUE	1.17	2-7-0-0-0	0-3-0-0-0	Hex-Hex-(Hex-)Hex-HexNAc-HexNAc+HexNAc3	Hex-(Hex-Hex-)Hex-HexNAc-HexNAc+HexNAc3
					3051	3050	937.692	937.444	4	3745.75	32.66	903.313	AHCVWLECPIPDAPVVTNVTVK	-	No	0	0.87	14.04	1.38	0	TRUE	7.76	3-3-1-0-0	0-0-1-0-0	HexNAc-Hex-(Hex-)Hex-HexNAc-HexNAc+DeHex1	Hex-(HexNAc-Hex-)Hex-HexNAc-HexNAc+DeHex1
					3053	3050	969.449	968.782	3	2903.32	32.68	684.815	LSHDANETLPLHLYVK	-	No	0	0.9	24.95	0	0	TRUE	9.17	2-4-0-0-0	0-1-0-0-0	Hex-(Hex-)Hex-HexNAc-HexNAc+HexNAc1
					3057	3050	1215.86	1215.51	3	3643.52	32.7	661.337	SYSTTYEERNITGTR	-	No	0	0.79	3.8	39.84	-3	TRUE	1.74	6-4-0-0-0	3-0-0-0-0	Hex-Hex-(HexNAc-Hex-)Hex-HexNAc-HexNAc+Hex3
					3075	3072	932.715	932.38	3	2794.12	32.82	728.687	EFCNLSLSER	-	No	1	0.72	116.52	112.55	0	TRUE	5.42	2-7-0-0-0	0-1-0-0-0	Hex-Hex-Hex-Hex-(Hex-)Hex-HexNAc-HexNAc+HexNAc1	Hex-Hex-Hex-(Hex-Hex-)Hex-HexNAc-HexNAc+HexNAc1	Hex-Hex-(Hex-Hex-Hex-)Hex-HexNAc-HexNAc+HexNAc1
					3081	3072	770.327	770.327	3	2307.96	32.85	729.611	EFCNLSLSER	-	No	0	0.95	51.99	0	-1	TRUE	7.51	2-4-0-0-0	0-1-0-0-0	Hex-(Hex-)Hex-HexNAc-HexNAc+HexNAc1
					3103	3094	953.94	953.689	4	3810.73	33.01	740.985	SLDAYPILNQAQALENHTEVQFQK	-	No	0	0.97	4.07	0	0	TRUE	8.14	2-4-0-0-0	0-1-0-0-0	Hex-(Hex-)Hex-HexNAc-HexNAc+HexNAc1
					3108	3105	1264.26	1263.92	3	3788.73	33.05	917.746	GCSSSTSVLLTLDNNVVNGSSPAIR	-	No	0	0.74	7.41	0.38	0	TRUE	1.74	3-3-1-0-0	0-0-1-0-0	HexNAc-Hex-(Hex-)Hex-HexNAc-HexNAc+DeHex1	Hex-(HexNAc-Hex-)Hex-HexNAc-HexNAc+DeHex1
					3134	3127	1348.9	1348.23	3	4041.66	33.22	1045	GQTEIQVNCPPAVTENK	-	No	0	0.82	1.57	105.85	0	TRUE	8.82	6-4-0-1-0	0-0-0-1-0	HexNAc-Hex-HexNAc-(HexNAc-)Hex-(HexNAc-Hex-)Hex-HexNAc-HexNAc+NeuAc1	HexNAc-Hex-HexNAc-Hex-(HexNAc-(HexNAc-)Hex-)Hex-HexNAc-HexNAc+NeuAc1	Hex-HexNAc-(HexNAc-)Hex-(HexNAc-(HexNAc-)Hex-)Hex-HexNAc-HexNAc+NeuAc1
					3143	3138	1208.46	1208.13	3	3621.36	33.28	1062.31	NPCTSEQNCTSPFSYK	-	No	1	0.84	135.64	17.17	0	TRUE	2.43	2-8-0-0-0	0-1-0-0-0	Hex-Hex-Hex-Hex-Hex-(Hex-)Hex-HexNAc-HexNAc+HexNAc1	Hex-Hex-Hex-Hex-(Hex-Hex-)Hex-HexNAc-HexNAc+HexNAc1	Hex-Hex-Hex-(Hex-Hex-Hex-)Hex-HexNAc-HexNAc+HexNAc1
					3147	3138	824.335	824.005	3	2468.99	33.31	648.292	LENWTDASR	-	No	0	0.91	5.62	4.15	0	TRUE	4.35	2-6-0-0-0	0-1-0-0-0	Hex-Hex-Hex-(Hex-)Hex-HexNAc-HexNAc+HexNAc1	Hex-Hex-(Hex-Hex-)Hex-HexNAc-HexNAc+HexNAc1
					3169	3160	1045.44	1045.1	3	3132.27	33.46	898.82	KHPDASVNFSEFSK	-	No	0	0.84	10.84	3.82	0	TRUE	7.48	2-7-0-0-0	0-1-0-0-0	Hex-Hex-Hex-Hex-(Hex-)Hex-HexNAc-HexNAc+HexNAc1	Hex-Hex-Hex-(Hex-Hex-)Hex-HexNAc-HexNAc+HexNAc1	Hex-Hex-(Hex-Hex-Hex-)Hex-HexNAc-HexNAc+HexNAc1
					3180	3171	1205.52	1204.85	3	3611.53	33.53	1044.9	GQTEIQVNCPPAVTENK	-	No	1	1	103.89	173.81	-2	TRUE	0.14	3-6-1-0-0	1-0-1-0-0	Hex-Hex-(Hex-Hex-Hex-)Hex-HexNAc-HexNAc+Hex1DeHex1	Hex-Hex-Hex-(Hex-Hex-)Hex-HexNAc-HexNAc+Hex1DeHex1	Hex-Hex-Hex-Hex-(Hex-)Hex-HexNAc-HexNAc+Hex1DeHex1
					3191	3182	902.114	901.781	3	2702.32	33.59	623.34	RPPLAELAALNLSGSR	-	No	0	0.86	12.56	0	0	TRUE	0.72	2-3-1-0-0	0-0-1-0-0	Hex-(Hex-)Hex-HexNAc-HexNAc+DeHex1
					3196	3193	966.423	966.088	3	2895.24	33.63	699.206	VFGSQNLTTVK	-	No	1	0.75	216.47	240.93	0	TRUE	3.04	2-8-0-0-0	0-1-0-0-0	Hex-Hex-Hex-Hex-Hex-(Hex-)Hex-HexNAc-HexNAc+HexNAc1	Hex-Hex-Hex-Hex-(Hex-Hex-)Hex-HexNAc-HexNAc+HexNAc1	Hex-Hex-Hex-(Hex-Hex-Hex-)Hex-HexNAc-HexNAc+HexNAc1
					3209	3204	1157.5	1157.17	3	3468.5	33.71	1127.52	LFNTSVEVLPFDNPQSDK	-	No	0	0.92	2.74	7.71	0	TRUE	5.07	3-5-0-0-0	0-1-0-0-0	HexNAc-(Hex-)Hex-(Hex-)Hex-HexNAc-HexNAc+HexNAc1	Hex-HexNAc-Hex-(Hex-)Hex-HexNAc-HexNAc+HexNAc1	HexNAc-Hex-(Hex-Hex-)Hex-HexNAc-HexNAc+HexNAc1
					3229	3226	1007.17	1006.84	3	3017.49	33.83	669.383	IAPASNVSHTVVLRPLK	-	No	0	0.72	234.71	25.72	0	TRUE	1.05	2-5-0-0-0	0-1-0-0-0	Hex-Hex-(Hex-)Hex-HexNAc-HexNAc+HexNAc1	Hex-(Hex-Hex-)Hex-HexNAc-HexNAc+HexNAc1
					3240	3237	805.693	805.359	3	2413.05	33.89	508.25	LFNVTPQDEQK	-	No	0	0.92	1.62	0	0	TRUE	2.83	3-3-0-0-0	1-0-0-0-0	Hex-(Hex-)Hex-HexNAc-HexNAc+Hex1
					3253	3248	780.019	780.019	3	2337.03	33.97	752.569	LGGWNITGPWAK	-	No	0	0.81	38.37	0	0	TRUE	9.82	2-3-1-0-0	0-0-1-0-0	Hex-(Hex-)Hex-HexNAc-HexNAc+DeHex1
					3279	3270	1094.82	1094.49	3	3280.45	34.13	681	ANIQFGDNGTTISAVSNK	-	No	0	0.91	3.52	0	-2	TRUE	0.97	4-3-1-0-0	2-0-0-0-0	Hex-(Hex-)Hex-HexNAc-(DeHex-)HexNAc+Hex2
					3288	3281	1034.46	1034.46	3	3100.35	34.19	1044.88	GQTEIQVNCPPAVTENK	-	No	1	0.73	138.97	0.76	-1	TRUE	4.02	2-5-0-0-0	0-1-0-0-0	Hex-Hex-(Hex-)Hex-HexNAc-HexNAc+HexNAc1	Hex-(Hex-Hex-)Hex-HexNAc-HexNAc+HexNAc1
					3306	3303	912.404	912.069	3	2733.18	34.31	699.147	VFGSQNLTTVK	-	No	1	0.97	80.38	65.16	0	TRUE	2.14	2-7-0-0-0	0-1-0-0-0	Hex-Hex-Hex-Hex-(Hex-)Hex-HexNAc-HexNAc+HexNAc1	Hex-Hex-Hex-(Hex-Hex-)Hex-HexNAc-HexNAc+HexNAc1	Hex-Hex-(Hex-Hex-Hex-)Hex-HexNAc-HexNAc+HexNAc1
					3359	3358	1363.59	1363.09	2	2724.16	34.65	532.799	IYIPLNK	-	No	0	0.63	24.69	22.82	0	TRUE	1.61	2-9-0-0-0	0-1-0-0-0	Hex-Hex-Hex-Hex-Hex-Hex-(Hex-)Hex-HexNAc-HexNAc+HexNAc1	Hex-Hex-Hex-Hex-Hex-(Hex-Hex-)Hex-HexNAc-HexNAc+HexNAc1	Hex-Hex-Hex-Hex-(Hex-Hex-Hex-)Hex-HexNAc-HexNAc+HexNAc1	Hex-Hex-Hex-(Hex-Hex-Hex-Hex-)Hex-HexNAc-HexNAc+HexNAc1
					3363	3358	875.378	875.131	4	3496.49	34.67	766.699	NPVGLIGAENATGETDPSHSK	-	No	0	0.85	28.41	26.67	0	TRUE	7.4	3-4-1-0-0	0-1-0-0-0	HexNAc-Hex-(Hex-)Hex-HexNAc-(DeHex-)HexNAc+HexNAc1	Hex-(HexNAc-Hex-)Hex-HexNAc-(DeHex-)HexNAc+HexNAc1
					3367	3358	1071.46	1070.96	4	4279.79	34.69	689.853	NRVPDSCCINVTVGCGINFNEK	-	No	0	0.87	0.68	2.59	-3	TRUE	0.11	3-6-1-0-0	0-3-0-0-0	HexNAc-Hex-(Hex-)Hex-HexNAc-(DeHex-)HexNAc+HexNAc3	Hex-(HexNAc-Hex-)Hex-HexNAc-(DeHex-)HexNAc+HexNAc3
					3370	3369	1282.56	1282.06	2	2562.11	34.71	532.799	IYIPLNK	-	No	0	0.71	32.1	28.18	0	TRUE	3.05	2-8-0-0-0	0-1-0-0-0	Hex-Hex-Hex-Hex-Hex-(Hex-)Hex-HexNAc-HexNAc+HexNAc1	Hex-Hex-Hex-Hex-(Hex-Hex-)Hex-HexNAc-HexNAc+HexNAc1	Hex-Hex-Hex-(Hex-Hex-Hex-)Hex-HexNAc-HexNAc+HexNAc1
					3385	3380	816.558	816.158	5	4075.76	34.8	486.886	SLCNSIISLNTTISCSEAQK	-	No	0	0.92	0.83	8.89	-2	TRUE	3.05	6-3-1-0-0	2-0-0-0-0	HexNAc-Hex-(HexNAc-Hex-)Hex-HexNAc-(DeHex-)HexNAc+Hex2	HexNAc-(HexNAc-)Hex-(Hex-)Hex-HexNAc-(DeHex-)HexNAc+Hex2
					3389	3380	909.394	909.06	3	2724.16	34.82	532.799	IYIPLNK	-	No	1	0.58	112.96	306.89	0	TRUE	2.06	2-9-0-0-0	0-1-0-0-0	Hex-Hex-Hex-Hex-Hex-Hex-(Hex-)Hex-HexNAc-HexNAc+HexNAc1	Hex-Hex-Hex-Hex-Hex-(Hex-Hex-)Hex-HexNAc-HexNAc+HexNAc1	Hex-Hex-Hex-Hex-(Hex-Hex-Hex-)Hex-HexNAc-HexNAc+HexNAc1	Hex-Hex-Hex-(Hex-Hex-Hex-Hex-)Hex-HexNAc-HexNAc+HexNAc1
					3409	3402	1377.58	1377.08	2	2752.14	34.94	756.366	ENGTNLTFIGDK	-	No	0	0.98	1.14	0.45	0	TRUE	10.2	4-3-1-0-0	1-0-0-0-0	HexNAc-Hex-(Hex-)Hex-HexNAc-(DeHex-)HexNAc+Hex1	Hex-(HexNAc-Hex-)Hex-HexNAc-(DeHex-)HexNAc+Hex1
					3411	3402	1146.12	1145.79	3	3434.34	34.96	700.305	KDTCTQECSYFNITK	-	No	0	0.87	21.82	9.3	-3	TRUE	4.34	2-7-0-0-0	0-3-0-0-0	Hex-Hex-(Hex-)Hex-HexNAc-HexNAc+HexNAc3	Hex-(Hex-Hex-)Hex-HexNAc-HexNAc+HexNAc3
					3418	3413	900.17	899.668	4	3594.64	35	623.34	RPPLAELAALNLSGSR	-	No	0	0.8	5.58	22.03	-2	TRUE	0.48	4-6-1-0-0	0-2-0-0-0	Hex-HexNAc-(HexNAc-)Hex-(Hex-)Hex-HexNAc-(DeHex-)HexNAc+HexNAc2	HexNAc-(Hex-HexNAc-)Hex-(Hex-)Hex-HexNAc-(DeHex-)HexNAc+HexNAc2	HexNAc-(HexNAc-)Hex-(Hex-Hex-)Hex-HexNAc-(DeHex-)HexNAc+HexNAc2	HexNAc-(Hex-)Hex-(HexNAc-Hex-)Hex-HexNAc-(DeHex-)HexNAc+HexNAc2	Hex-HexNAc-Hex-(HexNAc-Hex-)Hex-HexNAc-(DeHex-)HexNAc+HexNAc2	HexNAc-Hex-(HexNAc-(Hex-)Hex-)Hex-HexNAc-(DeHex-)HexNAc+HexNAc2	HexNAc-Hex-(Hex-HexNAc-Hex-)Hex-HexNAc-(DeHex-)HexNAc+HexNAc2
					3431	3424	915.761	915.429	3	2743.26	35.09	947.326	LENITTGTYTIHAQK	-	No	0	0.79	24.58	0	-1	TRUE	5.52	2-4-0-0-0	0-1-0-0-0	Hex-(Hex-)Hex-HexNAc-HexNAc+HexNAc1
					3447	3446	682.815	682.565	4	2726.23	35.18	266.903	IYIPLNK	-	No	0	0.96	0.22	2.21	0	TRUE	8.6	6-4-0-0-0	1-0-0-0-0	HexNAc-(HexNAc-)Hex-(Hex-HexNAc-Hex-)Hex-HexNAc-HexNAc+Hex1	HexNAc-(HexNAc-)Hex-(HexNAc-(Hex-)Hex-)Hex-HexNAc-HexNAc+Hex1	HexNAc-(Hex-HexNAc-)Hex-(HexNAc-Hex-)Hex-HexNAc-HexNAc+Hex1	Hex-HexNAc-(HexNAc-)Hex-(HexNAc-Hex-)Hex-HexNAc-HexNAc+Hex1
					3460	3457	1146.12	1145.79	3	3434.35	35.27	1049.74	KDTCTQECSYFNITK	-	No	1	0.93	68.02	10.4	-2	TRUE	1.56	2-7-0-0-0	0-2-0-0-0	Hex-Hex-Hex-(Hex-)Hex-HexNAc-HexNAc+HexNAc2	Hex-Hex-(Hex-Hex-)Hex-HexNAc-HexNAc+HexNAc2
					3473	3468	959.734	959.403	3	2875.19	35.35	514.022	ANNSWFQSILR	-	No	0	0.91	3.83	33.02	0	TRUE	7.47	2-7-0-0-0	0-1-0-0-0	Hex-Hex-Hex-Hex-(Hex-)Hex-HexNAc-HexNAc+HexNAc1	Hex-Hex-Hex-(Hex-Hex-)Hex-HexNAc-HexNAc+HexNAc1	Hex-Hex-(Hex-Hex-Hex-)Hex-HexNAc-HexNAc+HexNAc1
					3484	3479	919.726	919.396	3	2755.16	35.42	689.853	IVDVNLTSEGK	-	No	0	0.92	10.35	10.5	-2	TRUE	6.47	3-6-0-0-0	0-2-0-0-0	HexNAc-(Hex-)Hex-(Hex-)Hex-HexNAc-HexNAc+HexNAc2	Hex-HexNAc-Hex-(Hex-)Hex-HexNAc-HexNAc+HexNAc2	HexNAc-Hex-(Hex-Hex-)Hex-HexNAc-HexNAc+HexNAc2
					3486	3479	1001.77	1001.44	3	3001.29	35.43	771.878	VNCSVYVQLEK	-	No	0	0.91	13.43	3.94	0	TRUE	2.2	5-4-0-0-0	0-1-0-0-0	HexNAc-Hex-(HexNAc-(HexNAc-)Hex-)Hex-HexNAc-HexNAc+HexNAc1	HexNAc-(HexNAc-)Hex-(HexNAc-Hex-)Hex-HexNAc-HexNAc+HexNAc1
					3493	3490	905.723	905.383	3	2713.13	35.48	514.022	ANNSWFQSILR	-	No	0	0.96	3.23	32.98	0	TRUE	10.35	2-6-0-0-0	0-1-0-0-0	Hex-Hex-Hex-(Hex-)Hex-HexNAc-HexNAc+HexNAc1	Hex-Hex-(Hex-Hex-)Hex-HexNAc-HexNAc+HexNAc1
					3499	3490	974.074	973.409	3	2917.2	35.52	689.853	IVDVNLTSEGK	-	No	0	0.95	5.71	4.48	-2	TRUE	10.46	3-7-0-0-0	0-2-0-0-0	HexNAc-Hex-(Hex-Hex-Hex-)Hex-HexNAc-HexNAc+HexNAc2	HexNAc-Hex-(Hex-(Hex-)Hex-)Hex-HexNAc-HexNAc+HexNAc2	Hex-HexNAc-Hex-(Hex-Hex-)Hex-HexNAc-HexNAc+HexNAc2	HexNAc-(Hex-)Hex-(Hex-Hex-)Hex-HexNAc-HexNAc+HexNAc2	HexNAc-(Hex-Hex-)Hex-(Hex-)Hex-HexNAc-HexNAc+HexNAc2	Hex-HexNAc-(Hex-)Hex-(Hex-)Hex-HexNAc-HexNAc+HexNAc2
					3502	3501	836.732	836.4	3	2506.18	35.54	558.016	VEAAQNLTLPGSLR	-	No	0	0.97	67.17	0	0	TRUE	2.34	2-3-1-0-0	0-0-1-0-0	Hex-(Hex-)Hex-HexNAc-HexNAc+DeHex1
					3539	3534	739.308	739.06	4	2952.21	35.79	402.94	SWPAVGNCSSALR	-	No	0	0.89	0.55	0.56	-2	TRUE	1.24	3-4-0-1-0	1-0-0-1-0	Hex-Hex-(Hex-)Hex-HexNAc-HexNAc+Hex1NeuAc1	Hex-(Hex-Hex-)Hex-HexNAc-HexNAc+Hex1NeuAc1
					3543	3534	1012.43	1011.77	3	3032.28	35.81	909.43	LNPTVTYGNDSFSAK	-	No	0	0.86	6.29	2.64	0	TRUE	2.33	3-5-0-0-0	1-0-0-0-0	Hex-Hex-Hex-(Hex-)Hex-HexNAc-HexNAc+Hex1	Hex-Hex-(Hex-Hex-)Hex-HexNAc-HexNAc+Hex1
					3585	3578	987.084	987.084	3	2958.23	36.09	460.25	IVDVNLTSEGK	-	No	0	0.96	2.6	30.22	0	TRUE	10.73	4-6-0-0-0	0-1-0-0-0	HexNAc-Hex-Hex-Hex-(HexNAc-Hex-)Hex-HexNAc-HexNAc+HexNAc1
					3587	3578	1358.58	1357.58	2	2713.14	36.11	810.379	WGHNITEFQQR	-	No	0	0.94	1.94	0.67	0	TRUE	4.14	4-3-0-0-0	1-0-0-0-0	HexNAc-Hex-(Hex-)Hex-HexNAc-HexNAc+Hex1	Hex-(HexNAc-Hex-)Hex-HexNAc-HexNAc+Hex1
					3631	3622	1027.7	1027.45	4	4105.78	36.41	766.699	NPVGLIGAENATGETDPSHSK	-	No	0	0.7	3.17	142.49	0	TRUE	4.4	6-4-1-0-0	1-0-0-0-0	HexNAc-Hex-HexNAc-(HexNAc-)Hex-(Hex-)Hex-HexNAc-(DeHex-)HexNAc+Hex1	Hex-HexNAc-(HexNAc-)Hex-(HexNAc-Hex-)Hex-HexNAc-(DeHex-)HexNAc+Hex1	HexNAc-(HexNAc-)Hex-(Hex-(HexNAc-)Hex-)Hex-HexNAc-(DeHex-)HexNAc+Hex1	HexNAc-(Hex-)Hex-(HexNAc-(HexNAc-)Hex-)Hex-HexNAc-(DeHex-)HexNAc+Hex1	HexNAc-Hex-HexNAc-Hex-(HexNAc-Hex-)Hex-HexNAc-(DeHex-)HexNAc+Hex1	Hex-HexNAc-Hex-(HexNAc-(HexNAc-)Hex-)Hex-HexNAc-(DeHex-)HexNAc+Hex1
					3645	3644	940.45	939.948	4	3755.76	36.51	669.383	IAPASNVSHTVVLRPLK	-	No	0	0.85	4.07	8.75	-3	TRUE	1.3	5-4-0-1-0	2-0-0-1-0	HexNAc-(Hex-)Hex-(Hex-)Hex-HexNAc-HexNAc+Hex2NeuAc1	Hex-HexNAc-Hex-(Hex-)Hex-HexNAc-HexNAc+Hex2NeuAc1	HexNAc-Hex-(Hex-Hex-)Hex-HexNAc-HexNAc+Hex2NeuAc1
					3662	3655	1037.46	1036.79	3	3107.35	36.62	792.819	IFIFNQTGIEAK	-	No	0	0.92	1.18	1.31	-2	TRUE	4.48	3-6-1-0-0	0-2-0-0-0	DeHex-HexNAc-(Hex-)Hex-(Hex-)Hex-HexNAc-HexNAc+HexNAc2	DeHex-HexNAc-Hex-(Hex-Hex-)Hex-HexNAc-HexNAc+HexNAc2
					3702	3699	937.758	937.421	3	2809.24	36.9	415.896	NITIVTGAPR	-	No	0	0.82	3.2	32.36	0	TRUE	0.35	4-5-1-0-0	0-1-0-0-0	HexNAc-Hex-(Hex-(HexNAc-)Hex-)Hex-HexNAc-(DeHex-)HexNAc+HexNAc1	Hex-HexNAc-Hex-(HexNAc-Hex-)Hex-HexNAc-(DeHex-)HexNAc+HexNAc1	HexNAc-Hex-HexNAc-Hex-(Hex-)Hex-HexNAc-(DeHex-)HexNAc+HexNAc1	Hex-HexNAc-(HexNAc-)Hex-(Hex-)Hex-HexNAc-(DeHex-)HexNAc+HexNAc1	HexNAc-(Hex-)Hex-(HexNAc-Hex-)Hex-HexNAc-(DeHex-)HexNAc+HexNAc1	HexNAc-(HexNAc-)Hex-(Hex-Hex-)Hex-HexNAc-(DeHex-)HexNAc+HexNAc1
					3748	3743	906.063	905.733	3	2714.18	37.19	689.853	IVDVNLTSEGK	-	No	0	0.95	9.89	2.62	0	TRUE	7.38	2-7-0-0-0	0-1-0-0-0	Hex-Hex-Hex-Hex-(Hex-)Hex-HexNAc-HexNAc+HexNAc1	Hex-Hex-Hex-(Hex-Hex-)Hex-HexNAc-HexNAc+HexNAc1	Hex-Hex-(Hex-Hex-Hex-)Hex-HexNAc-HexNAc+HexNAc1
					3783	3776	1019.45	1019.45	3	3055.33	37.4	632.321	NITDLVEGAK	-	No	0	0.74	15.31	16.51	-2	TRUE	5.27	6-3-2-0-0	1-0-1-0-0	HexNAc-(HexNAc-)Hex-(HexNAc-Hex-)Hex-HexNAc-(DeHex-)HexNAc+Hex1DeHex1	HexNAc-Hex-(HexNAc-(HexNAc-)Hex-)Hex-HexNAc-(DeHex-)HexNAc+Hex1DeHex1
					3805	3798	745.681	745.681	3	2234.02	37.55	408.229	IIFANVSVR	-	No	0	0.89	0.76	1.35	0	TRUE	1.53	2-5-0-0-0	0-1-0-0-0	Hex-Hex-(Hex-)Hex-HexNAc-HexNAc+HexNAc1	Hex-(Hex-Hex-)Hex-HexNAc-HexNAc+HexNAc1
					3810	3809	958.445	957.78	3	2870.32	37.58	525.481	DLVVQQLVNVSR	-	No	0	0.96	7.83	0	-3	TRUE	5.78	5-3-0-0-0	3-0-0-0-0	Hex-(Hex-)Hex-HexNAc-HexNAc+Hex3
					3814	3809	1225.82	1225.15	3	3672.43	37.61	590.263	SVNPNDTCLASCVK	-	No	0	0.88	3.11	9.97	-3	TRUE	4.19	4-8-0-0-0	0-3-0-0-0	HexNAc-Hex-HexNAc-Hex-(Hex-Hex-)Hex-HexNAc-HexNAc+HexNAc3	HexNAc-Hex-Hex-Hex-(HexNAc-Hex-)Hex-HexNAc-HexNAc+HexNAc3
					3827	3820	1013.46	1012.96	4	4047.8	37.7	749.61	HTGPGILSMANAGPNTNGSQFFICTAK	-	No	0	0.98	59.73	0	-2	TRUE	1.03	3-4-0-0-0	1-1-0-0-0	Hex-(Hex-)Hex-HexNAc-HexNAc+Hex1HexNAc1
					3832	3831	676.562	676.311	4	2701.22	37.73	563.377	NNQLALTLIDTNR	-	No	0	0.92	1.37	0.18	0	TRUE	3.71	2-5-0-0-0	0-1-0-0-0	Hex-Hex-(Hex-)Hex-HexNAc-HexNAc+HexNAc1	Hex-(Hex-Hex-)Hex-HexNAc-HexNAc+HexNAc1
					3834	3831	1123.16	1122.83	3	3365.47	37.74	587.621	NHSIFLADINQER	-	No	0	0.94	1.9	21.87	-2	TRUE	7.11	5-4-1-0-0	2-0-0-0-0	Hex-Hex-(HexNAc-Hex-)Hex-HexNAc-(DeHex-)HexNAc+Hex2
					3867	3864	710.637	710.637	3	2128.89	37.95	647.322	LENWTDASR	-	No	0	0.91	5.83	0	0	TRUE	3.78	2-3-1-0-0	0-0-1-0-0	Hex-(Hex-)Hex-HexNAc-HexNAc+DeHex1
					3869	3864	1005.41	1004.74	3	3011.2	37.96	667.293	DLDTDFTNNASQPETK	-	No	0	0.9	24.42	4	0	TRUE	5.76	2-5-0-0-0	0-1-0-0-0	Hex-Hex-(Hex-)Hex-HexNAc-HexNAc+HexNAc1	Hex-(Hex-Hex-)Hex-HexNAc-HexNAc+HexNAc1
					3893	3886	1201.52	1201.52	3	3601.54	38.12	998.816	NMTFDLPSDATVVLNR	-	No	0	0.78	15.74	12.2	0	TRUE	5.02	5-4-1-0-0	1-0-0-0-0	DeHex-HexNAc-(Hex-)Hex-(HexNAc-Hex-)Hex-HexNAc-HexNAc+Hex1	DeHex-HexNAc-(HexNAc-)Hex-(Hex-Hex-)Hex-HexNAc-HexNAc+Hex1	DeHex-HexNAc-Hex-(Hex-(HexNAc-)Hex-)Hex-HexNAc-HexNAc+Hex1
					3937	3930	1085.44	1085.11	3	3252.3	38.41	719.842	ELAVPDGYTNR	-	No	0	0.81	21.74	40.91	-3	TRUE	3.98	3-6-1-1-0	1-0-1-1-0	Hex-Hex-Hex-Hex-(Hex-)Hex-HexNAc-HexNAc+Hex1DeHex1NeuAc1	Hex-Hex-Hex-(Hex-Hex-)Hex-HexNAc-HexNAc+Hex1DeHex1NeuAc1	Hex-Hex-(Hex-Hex-Hex-)Hex-HexNAc-HexNAc+Hex1DeHex1NeuAc1
					3939	3930	879.4	879.067	3	2634.18	38.42	567.498	NISQVLEK	-	No	0	0.81	13.15	4.12	0	TRUE	8.16	6-3-0-0-0	1-0-0-0-0	HexNAc-(HexNAc-)Hex-(HexNAc-Hex-)Hex-HexNAc-HexNAc+Hex1	HexNAc-Hex-(HexNAc-(HexNAc-)Hex-)Hex-HexNAc-HexNAc+Hex1
					3950	3941	670.801	670.546	4	2678.15	38.49	479.724	ELAVPDGYTNR	-	No	0	0.93	3.73	1.69	0	TRUE	5.38	4-3-1-0-0	0-0-1-0-0	HexNAc-(HexNAc-)Hex-(Hex-)Hex-HexNAc-HexNAc+DeHex1	HexNAc-Hex-(HexNAc-Hex-)Hex-HexNAc-HexNAc+DeHex1
					3961	3952	897.403	896.732	3	2687.17	38.56	599.618	KHPDASVNFSEFSK	-	No	0	0.9	76.92	0	-3	TRUE	3.27	3-3-0-0-0	1-0-0-0-0	Hex-(Hex-)Hex-HexNAc-HexNAc+Hex1
					3968	3963	832.9	832.644	4	3326.55	38.61	812.342	LDAPTNLQFVNETDSTVLVR	-	No	1	0.66	100.09	0	0	TRUE	0.29	3-3-0-0-0	1-0-0-0-0	Hex-(Hex-)Hex-HexNAc-HexNAc+Hex1
					3999	3996	755.585	755.083	4	3016.3	38.81	606.622	LNPTVTYGNDSFSAK	-	No	0	1	107.74	15.96	0	TRUE	4.69	3-4-1-0-0	0-0-1-0-0	HexNAc-(Hex-)Hex-(Hex-)Hex-HexNAc-HexNAc+DeHex1	Hex-HexNAc-Hex-(Hex-)Hex-HexNAc-HexNAc+DeHex1	HexNAc-Hex-(Hex-Hex-)Hex-HexNAc-HexNAc+DeHex1
					4023	4018	759.695	759.363	3	2275.07	38.96	611.841	IIFANVSVR	-	No	0	0.79	17.77	7.26	0	TRUE	6.22	3-4-0-0-0	0-1-0-0-0	HexNAc-Hex-(Hex-)Hex-HexNAc-HexNAc+HexNAc1	Hex-(HexNAc-Hex-)Hex-HexNAc-HexNAc+HexNAc1
					4027	4018	1020.45	1020.21	4	4076.82	38.99	659.317	IIISPEENVTLTCTAENQLER	-	No	0	0.9	5.2	9.65	0	TRUE	3.83	5-3-1-0-0	1-0-0-0-0	HexNAc-Hex-(HexNAc-Hex-)Hex-HexNAc-(DeHex-)HexNAc+Hex1	HexNAc-(HexNAc-)Hex-(Hex-)Hex-HexNAc-(DeHex-)HexNAc+Hex1
					4036	4029	870.392	870.392	3	2608.16	39.05	858.354	NITQIVGHSGCEAK	-	No	0	0.83	12.68	0	0	TRUE	6.08	3-3-0-0-0	1-0-0-0-0	Hex-(Hex-)Hex-HexNAc-HexNAc+Hex1
					4038	4029	1008.12	1007.46	3	3019.34	39.07	1085.44	SQNDTVTPDVWYTSKPK	-	No	1	0.74	126.04	0	0	TRUE	3.88	2-4-0-0-0	0-1-0-0-0	Hex-(Hex-)Hex-HexNAc-HexNAc+HexNAc1
					4047	4040	1091.45	1091.11	3	3270.32	39.12	804.873	SWPAVGNCSSALR	-	No	0	0.96	11.46	14.06	-3	TRUE	10.68	6-4-0-0-0	3-0-0-0-0	Hex-Hex-(HexNAc-Hex-)Hex-HexNAc-HexNAc+Hex3
					4069	4062	1027.15	1026.82	3	3077.45	39.28	613.33	LHNQLLPNVTTVER	-	No	0	0.93	1.35	12.94	0	TRUE	3.65	4-3-1-0-0	1-0-0-0-0	HexNAc-Hex-(Hex-)Hex-HexNAc-(DeHex-)HexNAc+Hex1	Hex-(HexNAc-Hex-)Hex-HexNAc-(DeHex-)HexNAc+Hex1
					4098	4095	926.165	925.664	4	3698.63	39.49	611.841	LATIANFSALGLEPGR	-	No	0	0.9	0.84	71.6	0	TRUE	9.9	7-4-0-0-0	1-0-0-0-0	HexNAc-Hex-HexNAc-Hex-(HexNAc-(HexNAc-)Hex-)Hex-HexNAc-HexNAc+Hex1	HexNAc-Hex-HexNAc-(HexNAc-)Hex-(HexNAc-Hex-)Hex-HexNAc-HexNAc+Hex1	Hex-HexNAc-(HexNAc-)Hex-(HexNAc-(HexNAc-)Hex-)Hex-HexNAc-HexNAc+Hex1
					4113	4106	1255.17	1255.17	3	3762.49	39.59	657.335	DTCTQECSYFNITK	-	No	0	0.94	0.6	8.27	-3	TRUE	4.87	6-3-2-0-0	3-0-0-0-0	DeHex-HexNAc-Hex-(Hex-)Hex-HexNAc-(DeHex-)HexNAc+Hex3
					4131	4128	1061.44	1060.94	2	2119.87	39.71	553.517	GASNLTWR	-	No	0	0.85	35.43	0	-2	TRUE	7.03	2-5-0-0-0	0-2-0-0-0	Hex-(Hex-)Hex-HexNAc-HexNAc+HexNAc2
					4140	4139	655.288	655.039	4	2616.13	39.77	508.25	LFNVTPQDEQK	-	No	0	1	101.11	0.57	0	TRUE	5.23	4-3-0-0-0	1-0-0-0-0	HexNAc-Hex-(Hex-)Hex-HexNAc-HexNAc+Hex1	Hex-(HexNAc-Hex-)Hex-HexNAc-HexNAc+Hex1
					4146	4139	806.364	806.364	4	3221.43	39.81	669.383	LSALDNLLNHSSMFLK	-	No	0	0.94	6.04	9.1	0	TRUE	6.37	3-5-0-0-0	0-1-0-0-0	HexNAc-(Hex-)Hex-(Hex-)Hex-HexNAc-HexNAc+HexNAc1	Hex-HexNAc-Hex-(Hex-)Hex-HexNAc-HexNAc+HexNAc1	HexNAc-Hex-(Hex-Hex-)Hex-HexNAc-HexNAc+HexNAc1
					4162	4161	1177.23	1176.57	3	3526.67	39.93	1317.63	VENGSETGPLPPELQPLLEGEVK	-	No	0	0.88	11.25	0	0	TRUE	5.33	3-3-0-0-0	1-0-0-0-0	Hex-(Hex-)Hex-HexNAc-HexNAc+Hex1
					4166	4161	752.351	752.351	3	2254.03	39.96	455.219	GHTLTLNFTR	-	No	1	0.59	37.08	0	-3	TRUE	7.26	3-3-0-0-0	1-0-0-0-0	Hex-(Hex-)Hex-HexNAc-HexNAc+Hex1
					4170	4161	1130.45	1130.45	3	3388.34	39.99	985.902	DTCTQECSYFNITK	-	No	0	0.96	4.93	0.43	-3	TRUE	9.08	4-5-0-0-0	1-2-0-0-0	HexNAc-Hex-(Hex-)Hex-HexNAc-HexNAc+Hex1HexNAc2	Hex-(HexNAc-Hex-)Hex-HexNAc-HexNAc+Hex1HexNAc2
					4173	4172	669.31	669.06	4	2672.21	40.01	526.507	LVQLFPNDTSLK	-	No	0	0.98	1.13	0.39	0	TRUE	10.78	4-3-0-0-0	1-0-0-0-0	HexNAc-Hex-(Hex-)Hex-HexNAc-HexNAc+Hex1	Hex-(HexNAc-Hex-)Hex-HexNAc-HexNAc+Hex1
					4199	4194	683.062	682.81	4	2727.21	40.18	328.178	AAENFTLLVK	-	No	0	0.91	1.02	3.74	-3	TRUE	2.86	4-5-0-0-0	1-2-0-0-0	HexNAc-Hex-(Hex-)Hex-HexNAc-HexNAc+Hex1HexNAc2	Hex-(HexNAc-Hex-)Hex-HexNAc-HexNAc+Hex1HexNAc2
					4208	4205	1056.12	1055.45	3	3163.34	40.24	731.027	DIYTFDGALNK	-	No	0	0.92	1.15	3.66	-3	TRUE	3.7	7-3-0-0-0	3-0-0-0-0	HexNAc-(HexNAc-)Hex-(Hex-)Hex-HexNAc-HexNAc+Hex3	HexNAc-Hex-(HexNAc-Hex-)Hex-HexNAc-HexNAc+Hex3
					4214	4205	856.383	856.383	4	3421.5	40.27	647.322	SGDASINVTNLQLSDIGTYQCK	-	No	0	0.86	21.39	0	0	TRUE	3.78	2-3-1-0-0	0-0-1-0-0	Hex-(Hex-)Hex-HexNAc-HexNAc+DeHex1
					4243	4238	953.14	952.81	3	2855.41	40.46	669.383	IAPASNVSHTVVLRPLK	-	No	0	0.95	7.94	0	0	TRUE	8.81	2-4-0-0-0	0-1-0-0-0	Hex-(Hex-)Hex-HexNAc-HexNAc+HexNAc1
					4258	4249	822.403	822.403	3	2464.19	40.56	525.481	DLVVQQLVNVSR	-	No	0	0.95	3.42	0	0	TRUE	5.15	3-3-0-0-0	1-0-0-0-0	Hex-(Hex-)Hex-HexNAc-HexNAc+Hex1
					4261	4260	903.396	903.06	3	2706.16	40.58	421.883	NITDLVEGAK	-	No	0	0.98	0.73	0	-3	TRUE	7.13	5-3-1-0-0	3-0-0-0-0	Hex-(Hex-)Hex-HexNAc-(DeHex-)HexNAc+Hex3
					4263	4260	681.304	681.304	4	2721.19	40.59	472.732	LANLTQGEDQYYLR	-	No	0	0.97	3.61	0	0	TRUE	8.25	2-3-1-0-0	0-0-1-0-0	Hex-(Hex-)Hex-HexNAc-HexNAc+DeHex1
					4276	4271	1259.04	1258.55	2	2515.09	40.68	752.361	LGGWNITGPWAK	-	No	0	0.89	28.38	10.52	0	TRUE	7.18	2-5-0-0-0	0-1-0-0-0	Hex-Hex-(Hex-)Hex-HexNAc-HexNAc+HexNAc1	Hex-(Hex-Hex-)Hex-HexNAc-HexNAc+HexNAc1
					4278	4271	910.733	910.395	3	2728.16	40.69	683.31	EIFVANGTQGK	-	No	0	0.82	2.17	1.06	0	TRUE	0.27	3-5-1-0-0	0-0-1-0-0	Hex-HexNAc-Hex-(Hex-Hex-)Hex-HexNAc-HexNAc+DeHex1	HexNAc-(Hex-)Hex-(Hex-Hex-)Hex-HexNAc-HexNAc+DeHex1	HexNAc-(Hex-Hex-)Hex-(Hex-)Hex-HexNAc-HexNAc+DeHex1	Hex-HexNAc-(Hex-)Hex-(Hex-)Hex-HexNAc-HexNAc+DeHex1	HexNAc-Hex-(Hex-(Hex-)Hex-)Hex-HexNAc-HexNAc+DeHex1	HexNAc-Hex-(Hex-Hex-Hex-)Hex-HexNAc-HexNAc+DeHex1
					4289	4282	1354.58	1354.09	2	2706.17	40.76	632.321	NITDLVEGAK	-	No	0	0.85	2.68	5.42	-3	TRUE	1.62	5-3-1-0-0	2-0-1-0-0	HexNAc-Hex-(Hex-)Hex-HexNAc-HexNAc+Hex2DeHex1	Hex-(HexNAc-Hex-)Hex-HexNAc-HexNAc+Hex2DeHex1
					4291	4282	1022.78	1022.11	3	3063.32	40.77	657.335	GSLSYLNVTR	-	No	1	0.68	35.95	35.4	-2	TRUE	7.17	5-4-0-1-0	2-0-0-0-0	NeuAc-Hex-HexNAc-Hex-(Hex-)Hex-HexNAc-HexNAc+Hex2
					4302	4293	1092.23	1091.46	4	4361.83	40.84	822.356	TNSTFVQALVEHVKEECDR	-	No	0	0.67	6.52	94.83	0	TRUE	3.69	5-4-1-1-0	1-0-0-0-0	NeuAc-Hex-HexNAc-(HexNAc-)Hex-(Hex-)Hex-HexNAc-(DeHex-)HexNAc+Hex1	NeuAc-Hex-HexNAc-Hex-(HexNAc-Hex-)Hex-HexNAc-(DeHex-)HexNAc+Hex1
					4305	4304	929.096	928.761	3	2783.26	40.87	792.819	IFIFNQTGIEAK	-	No	0	0.85	2.67	0.65	0	TRUE	0.09	3-4-1-0-0	0-1-0-0-0	Hex-(HexNAc-Hex-)Hex-HexNAc-(DeHex-)HexNAc+HexNAc1	HexNAc-Hex-(Hex-)Hex-HexNAc-(DeHex-)HexNAc+HexNAc1
					4311	4304	858.61	858.36	4	3429.41	40.9	394.444	DPQGWVAGNLSAR	-	No	0	0.87	2.55	16.59	-2	TRUE	1.99	4-5-1-1-0	1-0-0-1-0	Hex-(Hex-)Hex-(HexNAc-Hex-)Hex-HexNAc-(DeHex-)HexNAc+Hex1NeuAc1	Hex-Hex-Hex-(HexNAc-Hex-)Hex-HexNAc-(DeHex-)HexNAc+Hex1NeuAc1	Hex-Hex-(HexNAc-(Hex-)Hex-)Hex-HexNAc-(DeHex-)HexNAc+Hex1NeuAc1	Hex-Hex-(Hex-HexNAc-Hex-)Hex-HexNAc-(DeHex-)HexNAc+Hex1NeuAc1
					4342	4337	1282.91	1282.58	3	3844.7	41.11	998.816	HTGPGILSMANAGPNTNGSQFFICTAK	-	No	0	0.9	3.57	0	0	TRUE	2.92	2-4-0-0-0	0-1-0-0-0	Hex-(Hex-)Hex-HexNAc-HexNAc+HexNAc1
					4362	4359	874.387	874.193	5	4365.93	41.23	701.346	DSITGSGLENATISVAGINHNITTGR	-	No	0	0.9	3.63	4.16	0	TRUE	5.82	4-5-1-0-0	1-0-0-0-0	Hex-Hex-Hex-(DeHex-HexNAc-Hex-)Hex-HexNAc-HexNAc+Hex1	DeHex-HexNAc-Hex-Hex-Hex-(Hex-)Hex-HexNAc-HexNAc+Hex1
					4390	4381	747.346	746.846	4	2983.36	41.43	716.816	ELGPLYTNITADIGTDPR	-	No	1	0.62	24.57	0	-1	TRUE	1.72	2-3-1-0-0	0-0-1-0-0	Hex-(Hex-)Hex-HexNAc-HexNAc+DeHex1
					4393	4392	867.403	866.905	4	3463.59	41.45	613.33	HIVINGSSFGADGFPYVQVLK	-	No	0	0.91	6.4	4.69	0	TRUE	4.44	2-5-0-0-0	0-1-0-0-0	Hex-Hex-(Hex-)Hex-HexNAc-HexNAc+HexNAc1	Hex-(Hex-Hex-)Hex-HexNAc-HexNAc+HexNAc1
					4423	4414	738.674	738.674	3	2213	41.65	455.219	GHTLTLNFTR	-	No	0	0.95	1.45	0	-3	TRUE	4.96	2-4-0-0-0	0-1-0-0-0	Hex-(Hex-)Hex-HexNAc-HexNAc+HexNAc1
					4428	4425	1249.51	1248.84	3	3743.49	41.68	644.317	TFANGSLAFR	-	No	0	0.86	0.62	53.48	-3	TRUE	6.72	6-8-1-0-0	2-0-1-0-0	HexNAc-Hex-Hex-Hex-(HexNAc-Hex-Hex-(Hex-)Hex-)Hex-HexNAc-HexNAc+Hex2DeHex1	Hex-HexNAc-Hex-Hex-Hex-(HexNAc-Hex-Hex-Hex-)Hex-HexNAc-HexNAc+Hex2DeHex1	HexNAc-Hex-HexNAc-Hex-Hex-Hex-(Hex-Hex-Hex-)Hex-HexNAc-HexNAc+Hex2DeHex1	HexNAc-Hex-HexNAc-Hex-Hex-Hex-(Hex-(Hex-)Hex-)Hex-HexNAc-HexNAc+Hex2DeHex1	HexNAc-Hex-Hex-(Hex-)Hex-(HexNAc-Hex-Hex-Hex-)Hex-HexNAc-HexNAc+Hex2DeHex1	HexNAc-Hex-Hex-(HexNAc-Hex-Hex-)Hex-(Hex-Hex-)Hex-HexNAc-HexNAc+Hex2DeHex1	HexNAc-Hex-HexNAc-Hex-Hex-(Hex-)Hex-(Hex-Hex-)Hex-HexNAc-HexNAc+Hex2DeHex1	Hex-Hex-Hex-Hex-(HexNAc-Hex-HexNAc-(Hex-)Hex-)Hex-HexNAc-HexNAc+Hex2DeHex1	Hex-Hex-Hex-Hex-Hex-(HexNAc-Hex-HexNAc-Hex-)Hex-HexNAc-HexNAc+Hex2DeHex1	HexNAc-Hex-Hex-Hex-Hex-Hex-(Hex-HexNAc-Hex-)Hex-HexNAc-HexNAc+Hex2DeHex1	Hex-Hex-Hex-Hex-(HexNAc-Hex-Hex-(HexNAc-)Hex-)Hex-HexNAc-HexNAc+Hex2DeHex1	Hex-Hex-Hex-(Hex-)Hex-(HexNAc-Hex-HexNAc-Hex-)Hex-HexNAc-HexNAc+Hex2DeHex1	HexNAc-Hex-Hex-Hex-Hex-Hex-(HexNAc-(Hex-)Hex-)Hex-HexNAc-HexNAc+Hex2DeHex1	HexNAc-Hex-Hex-Hex-Hex-(Hex-)Hex-(HexNAc-Hex-)Hex-HexNAc-HexNAc+Hex2DeHex1	Hex-Hex-Hex-(HexNAc-Hex-Hex-)Hex-(HexNAc-Hex-)Hex-HexNAc-HexNAc+Hex2DeHex1
					4437	4436	667.298	667.047	4	2664.16	41.74	407.703	AGPNGTLFVADAYK	-	No	0	0.95	0.32	0.22	0	TRUE	4.95	3-3-1-0-0	0-0-1-0-0	HexNAc-Hex-(Hex-)Hex-HexNAc-HexNAc+DeHex1	Hex-(HexNAc-Hex-)Hex-HexNAc-HexNAc+DeHex1
					4445	4436	972.466	971.79	3	2912.35	41.79	835.897	VEAAQNLTLPGSLR	-	No	0	0.8	27.83	2.5	0	TRUE	2.01	4-3-1-0-0	1-0-0-0-0	HexNAc-Hex-(Hex-)Hex-HexNAc-(DeHex-)HexNAc+Hex1	Hex-(HexNAc-Hex-)Hex-HexNAc-(DeHex-)HexNAc+Hex1
					4452	4447	899.42	899.082	3	2694.23	41.84	466.579	VFGSQNLTTVK	-	No	0	0.97	3.48	0	-3	TRUE	7.07	5-3-0-0-0	3-0-0-0-0	Hex-(Hex-)Hex-HexNAc-HexNAc+Hex3
					4465	4458	708.3	708.3	5	3536.46	41.92	497.235	VDNITDQFCNASVVDPACVR	-	No	0	0.94	0.75	0.8	0	TRUE	4.28	3-4-0-0-0	0-1-0-0-0	HexNAc-Hex-(Hex-)Hex-HexNAc-HexNAc+HexNAc1	Hex-(HexNAc-Hex-)Hex-HexNAc-HexNAc+HexNAc1
					4481	4480	794.57	794.068	4	3172.24	42.02	653.3	NWQLTEEDFGNTSGR	-	No	0	0.88	33.65	32.37	0	TRUE	10.77	3-5-0-0-0	0-1-0-0-0	HexNAc-(Hex-)Hex-(Hex-)Hex-HexNAc-HexNAc+HexNAc1	Hex-HexNAc-Hex-(Hex-)Hex-HexNAc-HexNAc+HexNAc1	HexNAc-Hex-(Hex-Hex-)Hex-HexNAc-HexNAc+HexNAc1
					4520	4513	992.455	992.124	3	2973.35	42.27	1070.36	LNQTEPVAGNYYPVNTR	-	No	1	0.7	130.57	0	-1	TRUE	6.24	2-3-1-0-0	0-0-1-0-0	Hex-(Hex-)Hex-HexNAc-HexNAc+DeHex1
					4533	4524	1206.17	1206.17	3	3615.49	42.35	835.897	LHVTLYNCSFGR	-	No	0	0.88	1.79	1.31	-3	TRUE	2.57	5-7-0-0-0	2-1-0-0-0	HexNAc-Hex-Hex-(Hex-)Hex-(Hex-)Hex-HexNAc-HexNAc+Hex2HexNAc1	Hex-HexNAc-Hex-Hex-Hex-(Hex-)Hex-HexNAc-HexNAc+Hex2HexNAc1	HexNAc-Hex-Hex-Hex-(Hex-Hex-)Hex-HexNAc-HexNAc+Hex2HexNAc1	Hex-Hex-(Hex-)Hex-(HexNAc-Hex-)Hex-HexNAc-HexNAc+Hex2HexNAc1	Hex-Hex-Hex-Hex-(HexNAc-Hex-)Hex-HexNAc-HexNAc+Hex2HexNAc1	Hex-Hex-Hex-(HexNAc-(Hex-)Hex-)Hex-HexNAc-HexNAc+Hex2HexNAc1	Hex-Hex-Hex-(Hex-HexNAc-Hex-)Hex-HexNAc-HexNAc+Hex2HexNAc1
					4553	4546	1005.11	1005.11	3	3012.31	42.49	898.288	NPSTNVSVVVFDSTK	-	No	0	0.84	6.9	0.97	0	TRUE	3.81	3-5-0-0-0	0-1-0-0-0	Hex-Hex-(HexNAc-Hex-)Hex-HexNAc-HexNAc+HexNAc1
					4562	4557	846.891	846.386	4	3381.51	42.55	646.289	LDMSQNVSLVTAELSK	-	No	0	0.86	2.34	1.19	0	TRUE	1.73	5-3-1-0-0	1-0-0-0-0	HexNAc-(HexNAc-)Hex-(Hex-)Hex-HexNAc-(DeHex-)HexNAc+Hex1	HexNAc-Hex-(HexNAc-Hex-)Hex-HexNAc-(DeHex-)HexNAc+Hex1
					4613	4612	891.381	891.046	3	2670.12	42.87	646.289	FDITGVPANR	-	No	0	0.78	2.1	45.69	0	TRUE	2.01	3-6-0-0-0	0-1-0-0-0	Hex-Hex-(Hex-HexNAc-Hex-)Hex-HexNAc-HexNAc+HexNAc1	Hex-Hex-(HexNAc-(Hex-)Hex-)Hex-HexNAc-HexNAc+HexNAc1	Hex-(Hex-)Hex-(HexNAc-Hex-)Hex-HexNAc-HexNAc+HexNAc1
					4621	4612	837.356	837.022	3	2508.05	42.91	431.884	FDITGVPANR	-	No	0	0.98	3.41	0	-3	TRUE	9.54	3-5-0-0-0	1-2-0-0-0	Hex-(Hex-)Hex-HexNAc-HexNAc+Hex1HexNAc2
					4628	4623	1274.18	1273.51	3	3817.51	42.96	1126.99	DYGSQEDFTQVWNTTMK	-	No	0	0.88	2.09	7.27	0	TRUE	3.77	4-5-1-0-0	1-0-0-0-0	Hex-(Hex-)Hex-(DeHex-HexNAc-Hex-)Hex-HexNAc-HexNAc+Hex1	Hex-(DeHex-)HexNAc-Hex-(Hex-Hex-)Hex-HexNAc-HexNAc+Hex1	DeHex-HexNAc-(Hex-)Hex-(Hex-Hex-)Hex-HexNAc-HexNAc+Hex1	Hex-Hex-(DeHex-HexNAc-)Hex-(Hex-)Hex-HexNAc-HexNAc+Hex1	Hex-(DeHex-)HexNAc-(Hex-)Hex-(Hex-)Hex-HexNAc-HexNAc+Hex1	Hex-Hex-Hex-(DeHex-HexNAc-Hex-)Hex-HexNAc-HexNAc+Hex1
					4657	4656	1094.82	1094.49	3	3280.45	43.14	1021	ANIQFGDNGTTISAVSNK	-	No	0	0.84	6.14	0.32	0	TRUE	0.82	4-3-1-0-0	1-0-0-0-0	DeHex-HexNAc-Hex-(Hex-)Hex-HexNAc-HexNAc+Hex1
					4672	4667	985.112	984.776	3	2951.31	43.24	701.346	TILVDNNTWNNTHISR	-	No	0	0.94	11.18	0	0	TRUE	5.21	2-4-0-0-0	0-1-0-0-0	Hex-(Hex-)Hex-HexNAc-HexNAc+HexNAc1
					4681	4678	1083.49	1082.82	3	3245.45	43.3	663.994	EEEAIQLDGLNASQIR	-	No	0	0.97	0.56	0	-3	TRUE	6.32	4-4-0-0-0	2-1-0-0-0	Hex-(Hex-)Hex-HexNAc-HexNAc+Hex2HexNAc1
					4683	4678	855.397	855.145	4	3416.55	43.31	842.306	DIENLKDASSFLAEWQNITK	-	No	0	0.93	3.26	0	-1	TRUE	4.22	3-3-0-0-0	1-0-0-0-0	Hex-(Hex-)Hex-HexNAc-HexNAc+Hex1
					4687	4678	1125.45	1125.45	4	4497.77	43.33	757.35	DIVEYYNDSNGSHVLQGR	-	No	0	0.87	4.79	249.04	0	TRUE	6.84	4-10-0-0-0	0-1-0-0-0	Hex-HexNAc-(Hex-Hex-)Hex-(Hex-Hex-(Hex-HexNAc-)Hex-)Hex-HexNAc-HexNAc+HexNAc1	Hex-HexNAc-(Hex-Hex-Hex-)Hex-(Hex-HexNAc-(Hex-)Hex-)Hex-HexNAc-HexNAc+HexNAc1	Hex-HexNAc-(Hex-Hex-)Hex-(Hex-HexNAc-(Hex-Hex-)Hex-)Hex-HexNAc-HexNAc+HexNAc1	Hex-Hex-Hex-Hex-(Hex-HexNAc-)Hex-(Hex-(HexNAc-)Hex-)Hex-HexNAc-HexNAc+HexNAc1	Hex-Hex-Hex-(Hex-HexNAc-)Hex-(Hex-(Hex-HexNAc-)Hex-)Hex-HexNAc-HexNAc+HexNAc1	Hex-Hex-Hex-Hex-Hex-(HexNAc-)Hex-(Hex-(HexNAc-)Hex-)Hex-HexNAc-HexNAc+HexNAc1	Hex-Hex-Hex-Hex-(HexNAc-)Hex-(Hex-(Hex-HexNAc-)Hex-)Hex-HexNAc-HexNAc+HexNAc1	Hex-HexNAc-(Hex-HexNAc-)Hex-(Hex-Hex-Hex-(Hex-)Hex-)Hex-HexNAc-HexNAc+HexNAc1	Hex-HexNAc-(Hex-HexNAc-)Hex-(Hex-Hex-(Hex-Hex-)Hex-)Hex-HexNAc-HexNAc+HexNAc1	Hex-HexNAc-(Hex-HexNAc-)Hex-(Hex-Hex-Hex-Hex-Hex-)Hex-HexNAc-HexNAc+HexNAc1	Hex-Hex-Hex-Hex-(Hex-)Hex-(Hex-HexNAc-(HexNAc-)Hex-)Hex-HexNAc-HexNAc+HexNAc1	Hex-Hex-Hex-(Hex-Hex-)Hex-(Hex-HexNAc-(HexNAc-)Hex-)Hex-HexNAc-HexNAc+HexNAc1	Hex-Hex-Hex-(Hex-)Hex-(Hex-HexNAc-(Hex-HexNAc-)Hex-)Hex-HexNAc-HexNAc+HexNAc1	Hex-Hex-(Hex-Hex-Hex-)Hex-(Hex-HexNAc-(HexNAc-)Hex-)Hex-HexNAc-HexNAc+HexNAc1	Hex-Hex-(Hex-Hex-)Hex-(Hex-HexNAc-(Hex-HexNAc-)Hex-)Hex-HexNAc-HexNAc+HexNAc1	Hex-HexNAc-(Hex-Hex-)Hex-(Hex-Hex-Hex-(HexNAc-)Hex-)Hex-HexNAc-HexNAc+HexNAc1	Hex-Hex-Hex-Hex-Hex-Hex-(Hex-HexNAc-(HexNAc-)Hex-)Hex-HexNAc-HexNAc+HexNAc1	Hex-HexNAc-(Hex-Hex-Hex-)Hex-(Hex-Hex-(HexNAc-)Hex-)Hex-HexNAc-HexNAc+HexNAc1	Hex-Hex-(Hex-HexNAc-)Hex-(Hex-Hex-Hex-(HexNAc-)Hex-)Hex-HexNAc-HexNAc+HexNAc1	Hex-Hex-Hex-Hex-Hex-Hex-(HexNAc-)Hex-(HexNAc-Hex-)Hex-HexNAc-HexNAc+HexNAc1	Hex-Hex-Hex-Hex-Hex-(Hex-HexNAc-)Hex-(HexNAc-Hex-)Hex-HexNAc-HexNAc+HexNAc1	Hex-Hex-Hex-Hex-Hex-(HexNAc-)Hex-(HexNAc-(Hex-)Hex-)Hex-HexNAc-HexNAc+HexNAc1	Hex-Hex-Hex-Hex-Hex-(HexNAc-)Hex-(Hex-HexNAc-Hex-)Hex-HexNAc-HexNAc+HexNAc1	Hex-Hex-Hex-Hex-(Hex-HexNAc-)Hex-(HexNAc-(Hex-)Hex-)Hex-HexNAc-HexNAc+HexNAc1	Hex-Hex-Hex-Hex-(Hex-HexNAc-)Hex-(Hex-HexNAc-Hex-)Hex-HexNAc-HexNAc+HexNAc1
					4753	4744	1181.53	1181.2	3	3540.57	43.77	1021.29	ANIQFGDNGTTISAVSNK	-	No	1	0.59	113.75	7.74	-3	TRUE	4.34	6-3-0-0-0	3-0-0-0-0	HexNAc-Hex-(Hex-)Hex-HexNAc-HexNAc+Hex3	Hex-(HexNAc-Hex-)Hex-HexNAc-HexNAc+Hex3
					4760	4755	1377.08	1376.08	2	2750.14	43.82	950.444	NMSFVNDLTVTQDGR	-	No	0	0.98	1.37	0	0	TRUE	9.94	2-4-0-0-0	0-1-0-0-0	Hex-(Hex-)Hex-HexNAc-HexNAc+HexNAc1
					4789	4788	1228.26	1228.02	4	4908.05	44.01	1066.89	GLDFFQSPSFCPNPPGLEALSPNTSCR	-	No	0	0.85	3.34	9.34	0	TRUE	2.98	4-5-0-1-0	1-0-0-0-0	NeuAc-Hex-HexNAc-Hex-(Hex-Hex-)Hex-HexNAc-HexNAc+Hex1	NeuAc-Hex-HexNAc-(Hex-)Hex-(Hex-)Hex-HexNAc-HexNAc+Hex1
					4819	4810	1201.85	1201.17	3	3600.5	44.21	606.622	LNPTVTYGNDSFSAK	-	No	0	0.71	1.4	70.26	0	TRUE	1.29	5-6-0-0-0	1-0-0-0-0	Hex-(HexNAc-)Hex-(HexNAc-(Hex-Hex-)Hex-)Hex-HexNAc-HexNAc+Hex1	Hex-HexNAc-Hex-(Hex-HexNAc-(Hex-)Hex-)Hex-HexNAc-HexNAc+Hex1	Hex-(HexNAc-)Hex-(Hex-HexNAc-(Hex-)Hex-)Hex-HexNAc-HexNAc+Hex1	Hex-(Hex-HexNAc-)Hex-(HexNAc-(Hex-)Hex-)Hex-HexNAc-HexNAc+Hex1	HexNAc-(HexNAc-)Hex-(Hex-Hex-Hex-Hex-)Hex-HexNAc-HexNAc+Hex1	HexNAc-(Hex-HexNAc-)Hex-(Hex-Hex-Hex-)Hex-HexNAc-HexNAc+Hex1	HexNAc-(Hex-HexNAc-)Hex-(Hex-(Hex-)Hex-)Hex-HexNAc-HexNAc+Hex1	Hex-HexNAc-Hex-(HexNAc-(Hex-Hex-)Hex-)Hex-HexNAc-HexNAc+Hex1	HexNAc-(HexNAc-)Hex-(Hex-(Hex-Hex-)Hex-)Hex-HexNAc-HexNAc+Hex1	HexNAc-(Hex-Hex-)Hex-(Hex-HexNAc-Hex-)Hex-HexNAc-HexNAc+Hex1	HexNAc-Hex-HexNAc-Hex-(Hex-Hex-Hex-)Hex-HexNAc-HexNAc+Hex1	Hex-HexNAc-(Hex-HexNAc-)Hex-(Hex-Hex-)Hex-HexNAc-HexNAc+Hex1	Hex-HexNAc-(HexNAc-)Hex-(Hex-(Hex-)Hex-)Hex-HexNAc-HexNAc+Hex1	Hex-HexNAc-(HexNAc-)Hex-(Hex-Hex-Hex-)Hex-HexNAc-HexNAc+Hex1	HexNAc-Hex-HexNAc-(Hex-Hex-)Hex-(Hex-)Hex-HexNAc-HexNAc+Hex1	HexNAc-Hex-HexNAc-(Hex-)Hex-(Hex-Hex-)Hex-HexNAc-HexNAc+Hex1	Hex-HexNAc-Hex-HexNAc-Hex-(Hex-Hex-)Hex-HexNAc-HexNAc+Hex1	Hex-HexNAc-Hex-HexNAc-(Hex-)Hex-(Hex-)Hex-HexNAc-HexNAc+Hex1	HexNAc-(Hex-)Hex-(Hex-HexNAc-(Hex-)Hex-)Hex-HexNAc-HexNAc+Hex1	Hex-(Hex-HexNAc-)Hex-(Hex-HexNAc-Hex-)Hex-HexNAc-HexNAc+Hex1	HexNAc-Hex-HexNAc-Hex-(Hex-(Hex-)Hex-)Hex-HexNAc-HexNAc+Hex1	HexNAc-(Hex-)Hex-(HexNAc-(Hex-Hex-)Hex-)Hex-HexNAc-HexNAc+Hex1	HexNAc-(HexNAc-)Hex-(Hex-Hex-(Hex-)Hex-)Hex-HexNAc-HexNAc+Hex1	HexNAc-(Hex-Hex-)Hex-(HexNAc-(Hex-)Hex-)Hex-HexNAc-HexNAc+Hex1	Hex-Hex-(HexNAc-)Hex-(HexNAc-(Hex-)Hex-)Hex-HexNAc-HexNAc+Hex1
					4833	4832	713.586	713.337	4	2849.32	44.3	460.25	LHNQLLPNVTTVER	-	No	0	0.93	1.06	0.08	0	TRUE	3.68	2-5-0-0-0	0-1-0-0-0	Hex-(Hex-Hex-)Hex-HexNAc-HexNAc+HexNAc1
					4835	4832	1255.53	1255.19	3	3762.56	44.31	720.005	YQTLNCSVNVNCVNIR	-	No	0	0.97	5.51	22.74	-3	TRUE	9.54	5-4-1-0-0	3-0-0-0-0	Hex-(Hex-Hex-)Hex-HexNAc-(DeHex-)HexNAc+Hex3	Hex-Hex-(Hex-)Hex-HexNAc-(DeHex-)HexNAc+Hex3
					4850	4843	897.411	896.907	4	3583.6	44.41	535.762	DFEDLYTPVNGSIVIVR	-	No	0	0.96	3.22	0	-3	TRUE	5.65	5-3-1-0-0	3-0-0-0-0	Hex-(Hex-)Hex-HexNAc-(DeHex-)HexNAc+Hex3
					4861	4854	1015.1	1014.77	3	3041.29	44.47	532.799	YHGFLNTSYHR	-	No	0	0.94	2.69	12.06	0	TRUE	5.86	5-3-1-0-0	1-0-0-0-0	HexNAc-(HexNAc-)Hex-(Hex-)Hex-HexNAc-(DeHex-)HexNAc+Hex1	HexNAc-Hex-(HexNAc-Hex-)Hex-HexNAc-(DeHex-)HexNAc+Hex1
					4866	4865	1065.47	1065.14	3	3192.4	44.51	597.631	LNDTYVNVGLYSTK	-	No	0	0.85	0.37	2.88	0	TRUE	0.76	4-4-1-0-0	0-1-0-0-0	HexNAc-(HexNAc-)Hex-(Hex-)Hex-HexNAc-(DeHex-)HexNAc+HexNAc1	HexNAc-Hex-(HexNAc-Hex-)Hex-HexNAc-(DeHex-)HexNAc+HexNAc1
					4872	4865	745.342	744.681	3	2231.02	44.54	698.663	VFGSQNLTTVK	-	No	1	0.61	47.4	0	0	TRUE	2.3	2-3-1-0-0	0-0-1-0-0	Hex-(Hex-)Hex-HexNAc-HexNAc+DeHex1
					4899	4898	861.622	861.37	4	3441.45	44.72	599.479	NLTVCPDGALFEQK	-	No	0	0.94	3.45	0.55	-3	TRUE	5.18	6-3-1-0-0	3-0-0-0-0	HexNAc-Hex-(Hex-)Hex-HexNAc-(DeHex-)HexNAc+Hex3	Hex-(HexNAc-Hex-)Hex-HexNAc-(DeHex-)HexNAc+Hex3
					4914	4909	1138.5	1138	4	4547.98	44.81	763.07	TNITLVCKPGDLESAPVLR	-	No	0	0.87	2.04	57.27	0	TRUE	8.16	6-5-1-1-0	1-0-0-0-0	NeuAc-Hex-HexNAc-Hex-(HexNAc-Hex-(DeHex-)HexNAc-Hex-)Hex-HexNAc-HexNAc+Hex1	NeuAc-Hex-(DeHex-)HexNAc-(Hex-)Hex-(HexNAc-(HexNAc-)Hex-)Hex-HexNAc-HexNAc+Hex1	NeuAc-Hex-HexNAc-(Hex-)Hex-(DeHex-HexNAc-(HexNAc-)Hex-)Hex-HexNAc-HexNAc+Hex1	NeuAc-Hex-(DeHex-)HexNAc-(HexNAc-)Hex-(HexNAc-(Hex-)Hex-)Hex-HexNAc-HexNAc+Hex1	NeuAc-Hex-HexNAc-(HexNAc-)Hex-(DeHex-HexNAc-(Hex-)Hex-)Hex-HexNAc-HexNAc+Hex1	NeuAc-Hex-(DeHex-)HexNAc-(HexNAc-Hex-HexNAc-)Hex-(Hex-)Hex-HexNAc-HexNAc+Hex1	NeuAc-Hex-(DeHex-)HexNAc-(Hex-HexNAc-)Hex-(HexNAc-Hex-)Hex-HexNAc-HexNAc+Hex1	NeuAc-Hex-HexNAc-(HexNAc-Hex-(DeHex-)HexNAc-)Hex-(Hex-)Hex-HexNAc-HexNAc+Hex1	NeuAc-Hex-HexNAc-(Hex-(DeHex-)HexNAc-)Hex-(HexNAc-Hex-)Hex-HexNAc-HexNAc+Hex1	NeuAc-Hex-(DeHex-)HexNAc-(HexNAc-)Hex-(Hex-(HexNAc-)Hex-)Hex-HexNAc-HexNAc+Hex1	NeuAc-Hex-HexNAc-Hex-(Hex-(DeHex-)HexNAc-(HexNAc-)Hex-)Hex-HexNAc-HexNAc+Hex1	NeuAc-Hex-HexNAc-Hex-(DeHex-)HexNAc-(HexNAc-)Hex-(Hex-)Hex-HexNAc-HexNAc+Hex1	NeuAc-Hex-HexNAc-Hex-(DeHex-)HexNAc-Hex-(HexNAc-Hex-)Hex-HexNAc-HexNAc+Hex1	NeuAc-Hex-(DeHex-)HexNAc-Hex-HexNAc-(HexNAc-)Hex-(Hex-)Hex-HexNAc-HexNAc+Hex1	NeuAc-Hex-(DeHex-)HexNAc-Hex-HexNAc-Hex-(HexNAc-Hex-)Hex-HexNAc-HexNAc+Hex1	NeuAc-Hex-(DeHex-)HexNAc-(HexNAc-)Hex-(Hex-HexNAc-Hex-)Hex-HexNAc-HexNAc+Hex1	NeuAc-Hex-(DeHex-)HexNAc-Hex-(Hex-HexNAc-(HexNAc-)Hex-)Hex-HexNAc-HexNAc+Hex1	NeuAc-Hex-(DeHex-)HexNAc-Hex-(HexNAc-Hex-HexNAc-Hex-)Hex-HexNAc-HexNAc+Hex1	NeuAc-Hex-HexNAc-(HexNAc-)Hex-(Hex-(DeHex-)HexNAc-Hex-)Hex-HexNAc-HexNAc+Hex1	NeuAc-Hex-HexNAc-(DeHex-HexNAc-)Hex-(Hex-(HexNAc-)Hex-)Hex-HexNAc-HexNAc+Hex1
					4916	4909	835.613	835.366	4	3337.44	44.82	407.703	AGPNGTLFVADAYK	-	No	0	0.82	2.82	88.48	0	TRUE	5.78	4-5-2-0-0	0-0-1-0-0	Hex-(HexNAc-)Hex-(HexNAc-(Hex-)Hex-)Hex-HexNAc-(DeHex-)HexNAc+DeHex1	Hex-Hex-(HexNAc-)Hex-(HexNAc-Hex-)Hex-HexNAc-(DeHex-)HexNAc+DeHex1	Hex-(Hex-HexNAc-)Hex-(HexNAc-Hex-)Hex-HexNAc-(DeHex-)HexNAc+DeHex1	Hex-(HexNAc-)Hex-(Hex-HexNAc-Hex-)Hex-HexNAc-(DeHex-)HexNAc+DeHex1	Hex-HexNAc-(HexNAc-)Hex-(Hex-Hex-)Hex-HexNAc-(DeHex-)HexNAc+DeHex1	HexNAc-(Hex-HexNAc-)Hex-(Hex-Hex-)Hex-HexNAc-(DeHex-)HexNAc+DeHex1	HexNAc-(HexNAc-)Hex-(Hex-(Hex-)Hex-)Hex-HexNAc-(DeHex-)HexNAc+DeHex1	HexNAc-(HexNAc-)Hex-(Hex-Hex-Hex-)Hex-HexNAc-(DeHex-)HexNAc+DeHex1
					4936	4931	1002.78	1002.1	3	3003.26	44.95	647.322	FDITGVPANR	-	No	0	0.95	1.39	3.74	-1	TRUE	339.8	4-4-1-0-1	0-0-0-0-1	HexNAc-Hex-(Hex-HexNAc-Hex-)Hex-HexNAc-(DeHex-)HexNAc+NeuGc1	HexNAc-(Hex-HexNAc-)Hex-(Hex-)Hex-HexNAc-(DeHex-)HexNAc+NeuGc1	HexNAc-Hex-(HexNAc-(Hex-)Hex-)Hex-HexNAc-(DeHex-)HexNAc+NeuGc1
					4943	4942	797.12	796.869	4	3183.45	45	526.507	LVQLFPNDTSLK	-	No	0	0.96	0.44	1.53	-2	TRUE	6.06	5-4-1-0-0	2-0-0-0-0	Hex-Hex-(HexNAc-Hex-)Hex-HexNAc-(DeHex-)HexNAc+Hex2
					4962	4953	1062.49	1062.16	3	3183.45	45.12	1166.78	AALSNASLLAEACHQIFEGK	-	No	0	0.96	4.07	0	0	TRUE	6.6	2-4-0-0-0	0-1-0-0-0	Hex-(Hex-)Hex-HexNAc-HexNAc+HexNAc1
					5000	4997	812.362	812.029	3	2433.06	45.36	770.996	VNCSVYVQLEK	-	No	0	0.92	27.76	0	-1	TRUE	4.01	3-3-0-0-0	1-0-0-0-0	Hex-(Hex-)Hex-HexNAc-HexNAc+Hex1
					5026	5019	1032.49	1032.15	3	3093.43	45.52	919.492	LHNQLLPNVTTVER	-	No	0	0.82	1.65	0.24	0	TRUE	0	4-4-0-0-0	1-0-0-0-0	Hex-Hex-(HexNAc-Hex-)Hex-HexNAc-HexNAc+Hex1
					5033	5030	919.416	919.164	4	3672.63	45.57	716.948	ELGPLYTNITADIGTDPR	-	No	0	0.89	12.1	2.4	-2	TRUE	7.98	3-6-1-0-0	0-2-0-0-0	Hex-(DeHex-)HexNAc-Hex-(Hex-)Hex-HexNAc-HexNAc+HexNAc2
					5037	5030	1217.19	1216.53	3	3646.56	45.59	743.685	SSCGKENTSDPSLVIAFGR	-	No	0	0.87	9.55	2.78	-3	TRUE	2.88	4-5-0-0-0	1-2-0-0-0	Hex-(HexNAc-Hex-)Hex-HexNAc-HexNAc+Hex1HexNAc2	HexNAc-Hex-(Hex-)Hex-HexNAc-HexNAc+Hex1HexNAc2
					5053	5052	1060.49	1060.15	3	3177.43	45.7	714.013	DFEDLYTPVNGSIVIVR	-	No	0	0.98	21.59	2.43	0	TRUE	7.84	3-3-1-0-0	0-0-1-0-0	HexNAc-Hex-(Hex-)Hex-HexNAc-HexNAc+DeHex1	Hex-(HexNAc-Hex-)Hex-HexNAc-HexNAc+DeHex1
					5061	5052	1225.55	1224.87	3	3671.6	45.74	833.385	SKPVETPPEQNGTLTSQPNNR	-	No	0	0.94	1.78	0.88	0	TRUE	5.32	2-6-0-0-0	0-1-0-0-0	Hex-Hex-Hex-(Hex-)Hex-HexNAc-HexNAc+HexNAc1	Hex-Hex-(Hex-Hex-)Hex-HexNAc-HexNAc+HexNAc1
					5066	5063	860.057	859.719	3	2576.13	45.78	871.432	KQNNGAFNETLFR	-	No	0	0.93	5.65	0	0	TRUE	4.26	2-3-1-0-0	0-0-1-0-0	Hex-(Hex-)Hex-HexNAc-HexNAc+DeHex1
					5075	5074	987.96	987.706	4	3946.79	45.84	643.322	YLQPLLAVQFTNLTMDTEIR	-	No	0	0.85	3.16	9.66	0	TRUE	2.47	3-6-0-0-0	0-1-0-0-0	Hex-Hex-Hex-(HexNAc-Hex-)Hex-HexNAc-HexNAc+HexNAc1	HexNAc-Hex-Hex-Hex-(Hex-)Hex-HexNAc-HexNAc+HexNAc1
					5086	5085	889.396	889.059	3	2664.16	45.91	543.268	AGPNGTLFVADAYK	-	No	0	0.97	0.26	0	0	TRUE	6.6	3-3-1-0-0	1-0-0-0-0	Hex-(Hex-)Hex-HexNAc-(DeHex-)HexNAc+Hex1
					5088	5085	1067.82	1067.48	3	3199.42	45.93	899.447	NPSTNVSVVVFDSTK	-	No	0	0.74	15.63	8.87	0	TRUE	5.57	4-4-1-0-0	0-0-1-0-0	HexNAc-Hex-(Hex-HexNAc-Hex-)Hex-HexNAc-HexNAc+DeHex1	Hex-HexNAc-Hex-(HexNAc-Hex-)Hex-HexNAc-HexNAc+DeHex1	HexNAc-(Hex-)Hex-(HexNAc-Hex-)Hex-HexNAc-HexNAc+DeHex1	HexNAc-(HexNAc-)Hex-(Hex-Hex-)Hex-HexNAc-HexNAc+DeHex1	HexNAc-(Hex-HexNAc-)Hex-(Hex-)Hex-HexNAc-HexNAc+DeHex1	Hex-HexNAc-(HexNAc-)Hex-(Hex-)Hex-HexNAc-HexNAc+DeHex1	HexNAc-Hex-(HexNAc-(Hex-)Hex-)Hex-HexNAc-HexNAc+DeHex1
					5090	5085	713.587	713.338	4	2849.32	45.94	460.25	LHNQLLPNVTTVER	-	No	0	0.91	1.06	0.49	0	TRUE	2.31	2-5-0-0-0	0-1-0-0-0	Hex-Hex-(Hex-)Hex-HexNAc-HexNAc+HexNAc1	Hex-(Hex-Hex-)Hex-HexNAc-HexNAc+HexNAc1
					5108	5107	889.394	889.06	3	2664.16	46.05	543.268	AGPNGTLFVADAYK	-	No	0	0.96	0.16	0.16	0	TRUE	5.86	3-3-1-0-0	0-0-1-0-0	HexNAc-Hex-(Hex-)Hex-HexNAc-HexNAc+DeHex1	Hex-(HexNAc-Hex-)Hex-HexNAc-HexNAc+DeHex1
					5112	5107	1055.49	1054.99	4	4215.92	46.07	643.322	YLQPLLAVQFTNLTMDTEIR	-	No	0	0.69	4.6	88.84	-3	TRUE	5.21	6-3-1-0-0	2-0-1-0-0	HexNAc-(HexNAc-)Hex-(Hex-)Hex-HexNAc-HexNAc+Hex2DeHex1	HexNAc-Hex-(HexNAc-Hex-)Hex-HexNAc-HexNAc+Hex2DeHex1
					5116	5107	848.634	848.387	4	3389.52	46.1	716.948	ELGPLYTNITADIGTDPR	-	No	0	0.6	11.06	12.67	0	TRUE	0	4-3-1-0-0	0-0-1-0-0	HexNAc-(HexNAc-)Hex-(Hex-)Hex-HexNAc-HexNAc+DeHex1	HexNAc-Hex-(HexNAc-Hex-)Hex-HexNAc-HexNAc+DeHex1
					5147	5140	1501.4	1501.13	4	6000.51	46.29	1555.37	MYSMMMETDLHSPGGAQAPTNLSGPAGAGGGGGGGGGGGGGGGAKANQDR	-	No	0	0.98	18.95	2.17	0	TRUE	6.18	2-7-0-0-0	0-1-0-0-0	Hex-Hex-Hex-Hex-(Hex-)Hex-HexNAc-HexNAc+HexNAc1	Hex-Hex-Hex-(Hex-Hex-)Hex-HexNAc-HexNAc+HexNAc1	Hex-Hex-(Hex-Hex-Hex-)Hex-HexNAc-HexNAc+HexNAc1
					5154	5151	968.441	967.778	3	2900.31	46.34	684.349	NLTHLESLHLEDNALK	-	No	0	0.97	19.14	0	0	TRUE	7.41	2-4-0-0-0	0-1-0-0-0	Hex-(Hex-)Hex-HexNAc-HexNAc+HexNAc1
					5156	5151	1127.17	1126.83	3	3377.47	46.35	599.287	NPSTNVSVVVFDSTK	-	No	0	0.9	4.97	26.76	-3	TRUE	4.26	4-6-0-0-0	1-2-0-0-0	HexNAc-(Hex-)Hex-(Hex-)Hex-HexNAc-HexNAc+Hex1HexNAc2	Hex-HexNAc-Hex-(Hex-)Hex-HexNAc-HexNAc+Hex1HexNAc2	HexNAc-Hex-(Hex-Hex-)Hex-HexNAc-HexNAc+Hex1HexNAc2
					5165	5162	1084.1	1083.43	3	3247.26	46.41	394.444	LCLNNDTK	-	No	0	0.75	0.56	31.07	0	TRUE	1.58	4-9-0-0-0	0-1-0-0-0	Hex-Hex-(HexNAc-)Hex-(Hex-Hex-(Hex-HexNAc-)Hex-)Hex-HexNAc-HexNAc+HexNAc1	Hex-Hex-Hex-Hex-(Hex-HexNAc-(Hex-HexNAc-)Hex-)Hex-HexNAc-HexNAc+HexNAc1	Hex-Hex-Hex-Hex-Hex-(HexNAc-(Hex-HexNAc-)Hex-)Hex-HexNAc-HexNAc+HexNAc1	Hex-Hex-Hex-Hex-Hex-(Hex-HexNAc-(HexNAc-)Hex-)Hex-HexNAc-HexNAc+HexNAc1	Hex-Hex-Hex-Hex-Hex-Hex-(HexNAc-(HexNAc-)Hex-)Hex-HexNAc-HexNAc+HexNAc1	Hex-Hex-(Hex-)Hex-(Hex-HexNAc-(Hex-HexNAc-)Hex-)Hex-HexNAc-HexNAc+HexNAc1	Hex-Hex-(Hex-Hex-)Hex-(Hex-HexNAc-(HexNAc-)Hex-)Hex-HexNAc-HexNAc+HexNAc1	Hex-Hex-(Hex-Hex-Hex-)Hex-(HexNAc-(HexNAc-)Hex-)Hex-HexNAc-HexNAc+HexNAc1	Hex-Hex-Hex-(Hex-)Hex-(HexNAc-(Hex-HexNAc-)Hex-)Hex-HexNAc-HexNAc+HexNAc1	Hex-Hex-Hex-(Hex-)Hex-(Hex-HexNAc-(HexNAc-)Hex-)Hex-HexNAc-HexNAc+HexNAc1	Hex-Hex-Hex-(Hex-Hex-)Hex-(HexNAc-(HexNAc-)Hex-)Hex-HexNAc-HexNAc+HexNAc1	Hex-Hex-Hex-Hex-(Hex-)Hex-(HexNAc-(HexNAc-)Hex-)Hex-HexNAc-HexNAc+HexNAc1	Hex-HexNAc-(HexNAc-)Hex-(Hex-Hex-Hex-Hex-Hex-)Hex-HexNAc-HexNAc+HexNAc1	Hex-HexNAc-(HexNAc-)Hex-(Hex-Hex-(Hex-Hex-)Hex-)Hex-HexNAc-HexNAc+HexNAc1	Hex-HexNAc-(HexNAc-)Hex-(Hex-Hex-Hex-(Hex-)Hex-)Hex-HexNAc-HexNAc+HexNAc1	Hex-HexNAc-(Hex-HexNAc-)Hex-(Hex-Hex-Hex-Hex-)Hex-HexNAc-HexNAc+HexNAc1	Hex-HexNAc-(Hex-HexNAc-)Hex-(Hex-(Hex-Hex-)Hex-)Hex-HexNAc-HexNAc+HexNAc1	Hex-HexNAc-(Hex-HexNAc-)Hex-(Hex-Hex-(Hex-)Hex-)Hex-HexNAc-HexNAc+HexNAc1	Hex-Hex-Hex-Hex-(Hex-HexNAc-)Hex-(HexNAc-Hex-)Hex-HexNAc-HexNAc+HexNAc1	Hex-Hex-Hex-(Hex-HexNAc-)Hex-(HexNAc-(Hex-)Hex-)Hex-HexNAc-HexNAc+HexNAc1	Hex-Hex-(Hex-Hex-)Hex-(HexNAc-(Hex-HexNAc-)Hex-)Hex-HexNAc-HexNAc+HexNAc1	Hex-HexNAc-(Hex-Hex-Hex-)Hex-(HexNAc-(Hex-)Hex-)Hex-HexNAc-HexNAc+HexNAc1	Hex-Hex-(Hex-HexNAc-)Hex-(Hex-Hex-(HexNAc-)Hex-)Hex-HexNAc-HexNAc+HexNAc1	Hex-Hex-Hex-(Hex-HexNAc-)Hex-(Hex-HexNAc-Hex-)Hex-HexNAc-HexNAc+HexNAc1	Hex-Hex-(HexNAc-)Hex-(Hex-HexNAc-(Hex-Hex-)Hex-)Hex-HexNAc-HexNAc+HexNAc1
					5167	5162	1166.5	1166.17	3	3495.5	46.42	995.487	EEEAIQLDGLNASQIR	-	No	0	0.87	1.36	0.97	0	TRUE	2.03	3-5-0-1-0	0-1-0-0-0	NeuAc-Hex-HexNAc-Hex-(Hex-)Hex-HexNAc-HexNAc+HexNAc1
					5185	5184	867.076	866.4	3	2596.18	46.54	792.819	IFIFNQTGIEAK	-	No	0	0.7	8.28	1.66	0	TRUE	0.19	2-5-0-0-0	0-1-0-0-0	Hex-Hex-(Hex-)Hex-HexNAc-HexNAc+HexNAc1	Hex-(Hex-Hex-)Hex-HexNAc-HexNAc+HexNAc1
					5187	5184	1120.13	1119.46	3	3355.35	46.55	646.617	NHTWLPVSDDACYR	-	No	0	0.99	101.34	1.38	-3	TRUE	1.38	4-5-0-0-0	2-1-0-0-0	Hex-Hex-(Hex-)Hex-HexNAc-HexNAc+Hex2HexNAc1	Hex-(Hex-Hex-)Hex-HexNAc-HexNAc+Hex2HexNAc1
					5220	5217	1025.12	1024.46	3	3070.34	46.76	814.399	AGPNGTLFVADAYK	-	No	0	0.55	8.62	106.78	0	TRUE	4.21	5-3-1-0-0	1-0-0-0-0	HexNAc-(HexNAc-)Hex-(Hex-)Hex-HexNAc-(DeHex-)HexNAc+Hex1	HexNAc-Hex-(HexNAc-Hex-)Hex-HexNAc-(DeHex-)HexNAc+Hex1
					5226	5217	758.835	758.335	4	3029.31	46.79	543.268	AGPNGTLFVADAYK	-	No	0	0.93	9.4	22.78	-1	TRUE	338.33	4-3-0-0-1	0-0-0-0-1	HexNAc-Hex-(HexNAc-Hex-)Hex-HexNAc-HexNAc+NeuGc1	HexNAc-(HexNAc-)Hex-(Hex-)Hex-HexNAc-HexNAc+NeuGc1
					5246	5239	813.376	813.376	3	2437.11	46.91	611.255	IIFANVSVR	-	No	1	0.54	21.26	0.33	-2	TRUE	0.6	3-5-0-0-0	0-2-0-0-0	HexNAc-Hex-(Hex-)Hex-HexNAc-HexNAc+HexNAc2	Hex-(HexNAc-Hex-)Hex-HexNAc-HexNAc+HexNAc2
					5248	5239	1112.82	1112.15	3	3333.43	46.92	995.487	EEEAIQLDGLNASQIR	-	No	0	0.94	2.05	0.17	-2	TRUE	4.54	3-4-0-1-0	1-0-0-1-0	Hex-Hex-(Hex-)Hex-HexNAc-HexNAc+Hex1NeuAc1	Hex-(Hex-Hex-)Hex-HexNAc-HexNAc+Hex1NeuAc1
					5270	5261	1058.48	1057.81	3	3170.41	47.05	836.84	VEAAQNLTLPGSLR	-	No	1	0.83	78.28	15.62	0	TRUE	6.08	2-8-0-0-0	0-1-0-0-0	Hex-Hex-Hex-Hex-Hex-(Hex-)Hex-HexNAc-HexNAc+HexNAc1	Hex-Hex-Hex-Hex-(Hex-Hex-)Hex-HexNAc-HexNAc+HexNAc1	Hex-Hex-Hex-(Hex-Hex-Hex-)Hex-HexNAc-HexNAc+HexNAc1
					5275	5272	1011.76	1011.43	3	3031.26	47.09	835.897	LHVTLYNCSFGR	-	No	0	0.94	2.92	2.59	0	TRUE	4.83	3-5-1-0-0	0-1-0-0-0	HexNAc-Hex-(Hex-Hex-)Hex-HexNAc-(DeHex-)HexNAc+HexNAc1	HexNAc-(Hex-)Hex-(Hex-)Hex-HexNAc-(DeHex-)HexNAc+HexNAc1	Hex-HexNAc-Hex-(Hex-)Hex-HexNAc-(DeHex-)HexNAc+HexNAc1
					5286	5283	997.787	997.452	3	2989.34	47.15	895.624	LNDTYVNVGLYSTK	-	No	0	0.95	0.91	0.15	0	TRUE	6.53	3-4-1-0-0	0-0-1-0-0	Hex-Hex-(HexNAc-Hex-)Hex-HexNAc-HexNAc+DeHex1
					5297	5294	1416.11	1415.61	2	2829.2	47.22	909.43	LNPTVTYGNDSFSAK	-	No	0	0.65	52.63	19.81	0	TRUE	3.19	2-5-0-0-0	0-1-0-0-0	Hex-Hex-(Hex-)Hex-HexNAc-HexNAc+HexNAc1	Hex-(Hex-Hex-)Hex-HexNAc-HexNAc+HexNAc1
					5303	5294	1210.85	1210.52	3	3628.54	47.26	1084.55	SQNDTVTPDVWYTSKPK	-	No	1	0.79	46.62	14.43	0	TRUE	8.41	5-4-0-0-0	1-0-0-0-0	HexNAc-Hex-(Hex-(HexNAc-)Hex-)Hex-HexNAc-HexNAc+Hex1	HexNAc-(HexNAc-)Hex-(Hex-Hex-)Hex-HexNAc-HexNAc+Hex1	Hex-HexNAc-Hex-(HexNAc-Hex-)Hex-HexNAc-HexNAc+Hex1	HexNAc-Hex-HexNAc-Hex-(Hex-)Hex-HexNAc-HexNAc+Hex1	Hex-HexNAc-(HexNAc-)Hex-(Hex-)Hex-HexNAc-HexNAc+Hex1	HexNAc-(Hex-)Hex-(HexNAc-Hex-)Hex-HexNAc-HexNAc+Hex1
					5325	5316	1169.71	1169.46	4	4673.8	47.39	792.819	FPDEEGACQPCPINCTHSCVDLDDK	-	No	0	0.89	3.79	18.81	-2	TRUE	4.28	3-5-0-1-0	1-0-0-1-0	Hex-Hex-(Hex-Hex-)Hex-HexNAc-HexNAc+Hex1NeuAc1	Hex-Hex-Hex-(Hex-)Hex-HexNAc-HexNAc+Hex1NeuAc1
					5330	5327	988.696	988.19	4	3948.73	47.43	765.358	TVNSLNVSAISIPEHDEADEISDENR	-	No	0	0.7	13.39	0	0	TRUE	1.73	3-3-0-0-0	1-0-0-0-0	Hex-(Hex-)Hex-HexNAc-HexNAc+Hex1
					5336	5327	1031.45	1031.11	3	3090.32	47.46	577.28	YSVANDTGFVDIPK	-	No	0	0.75	14.15	56.78	0	TRUE	1.26	3-5-1-0-0	0-1-0-0-0	HexNAc-Hex-(Hex-Hex-)Hex-HexNAc-(DeHex-)HexNAc+HexNAc1	Hex-HexNAc-Hex-(Hex-)Hex-HexNAc-(DeHex-)HexNAc+HexNAc1	HexNAc-(Hex-)Hex-(Hex-)Hex-HexNAc-(DeHex-)HexNAc+HexNAc1
					5343	5338	1333.6	1333.09	2	2664.17	47.51	813.912	AGPNGTLFVADAYK	-	No	1	0.89	191.91	28.4	0	TRUE	1.92	3-3-1-0-0	0-0-1-0-0	HexNAc-Hex-(Hex-)Hex-HexNAc-HexNAc+DeHex1	Hex-(HexNAc-Hex-)Hex-HexNAc-HexNAc+DeHex1
					5361	5360	889.4	889.067	3	2664.18	47.61	814.155	AGPNGTLFVADAYK	-	No	0	0.83	9.93	0.6	0	TRUE	2.11	3-3-1-0-0	0-0-1-0-0	HexNAc-Hex-(Hex-)Hex-HexNAc-HexNAc+DeHex1	Hex-(HexNAc-Hex-)Hex-HexNAc-HexNAc+DeHex1
					5372	5371	1148.47	1148.14	3	3441.39	47.68	540.255	WGHNITEFQQR	-	No	0	0.86	16.63	32.77	0	TRUE	5.89	2-10-0-0-0	0-1-0-0-0	Hex-Hex-Hex-Hex-(Hex-Hex-Hex-Hex-)Hex-HexNAc-HexNAc+HexNAc1	Hex-Hex-Hex-Hex-Hex-Hex-(Hex-Hex-)Hex-HexNAc-HexNAc+HexNAc1	Hex-Hex-Hex-Hex-Hex-Hex-Hex-(Hex-)Hex-HexNAc-HexNAc+HexNAc1	Hex-Hex-Hex-Hex-Hex-(Hex-Hex-Hex-)Hex-HexNAc-HexNAc+HexNAc1
					5389	5382	1094.78	1094.11	3	3279.32	47.79	810.421	WGHNITEFQQR	-	No	1	0.66	54.7	60.81	-2	TRUE	1.49	2-9-0-0-0	0-2-0-0-0	Hex-Hex-Hex-Hex-Hex-(Hex-)Hex-HexNAc-HexNAc+HexNAc2	Hex-Hex-Hex-Hex-(Hex-Hex-)Hex-HexNAc-HexNAc+HexNAc2	Hex-Hex-Hex-(Hex-Hex-Hex-)Hex-HexNAc-HexNAc+HexNAc2
					5391	5382	1130.51	1130.51	3	3388.51	47.81	833.385	SKPVETPPEQNGTLTSQPNNR	-	No	0	0.75	40.95	0	0	TRUE	7.57	3-3-0-0-0	1-0-0-0-0	Hex-(Hex-)Hex-HexNAc-HexNAc+Hex1
					5402	5393	1277.54	1277.04	2	2552.07	47.88	1351.82	VNETEMDIAK	-	No	0	0.71	23.92	0	-3	TRUE	8.13	3-4-1-0-0	1-1-1-0-0	Hex-(Hex-)Hex-HexNAc-HexNAc+Hex1HexNAc1DeHex1
					5411	5404	1140.14	1139.47	3	3415.4	47.93	1040.49	DINSQQELQNITTDTR	-	No	0	0.94	10.37	2.53	-2	TRUE	9.79	2-7-0-0-0	0-2-0-0-0	Hex-Hex-Hex-(Hex-)Hex-HexNAc-HexNAc+HexNAc2	Hex-Hex-(Hex-Hex-)Hex-HexNAc-HexNAc+HexNAc2
					5427	5426	1040.77	1040.1	3	3117.28	48.04	810.249	WGHNITEFQQR	-	No	0	0.72	39.98	18.6	-1	TRUE	7.21	2-8-0-0-0	0-1-0-0-0	Hex-Hex-Hex-Hex-Hex-(Hex-)Hex-HexNAc-HexNAc+HexNAc1	Hex-Hex-Hex-Hex-(Hex-Hex-)Hex-HexNAc-HexNAc+HexNAc1	Hex-Hex-Hex-(Hex-Hex-Hex-)Hex-HexNAc-HexNAc+HexNAc1
					5435	5426	1133.86	1133.18	3	3396.53	48.09	1070.89	DFEDLYTPVNGSIVIVR	-	No	0	0.55	30.8	15.05	0	TRUE	1.22	4-4-0-0-0	0-1-0-0-0	HexNAc-(HexNAc-)Hex-(Hex-)Hex-HexNAc-HexNAc+HexNAc1	HexNAc-Hex-(HexNAc-Hex-)Hex-HexNAc-HexNAc+HexNAc1
					5442	5437	1258.04	1257.53	2	2513.05	48.13	729.575	DIYTFDGALNK	-	No	0	0.94	0.27	0.29	0	TRUE	4.37	3-4-0-0-0	0-1-0-0-0	HexNAc-Hex-(Hex-)Hex-HexNAc-HexNAc+HexNAc1	Hex-(HexNAc-Hex-)Hex-HexNAc-HexNAc+HexNAc1
					5449	5448	1117.76	1117.26	4	4464.99	48.18	989.963	LLNATHQIGCQSSISGDTGVIHVVEK	-	No	1	0.78	178.04	54.8	0	TRUE	0.66	2-8-0-0-0	0-1-0-0-0	Hex-Hex-Hex-Hex-Hex-(Hex-)Hex-HexNAc-HexNAc+HexNAc1	Hex-Hex-Hex-Hex-(Hex-Hex-)Hex-HexNAc-HexNAc+HexNAc1	Hex-Hex-Hex-(Hex-Hex-Hex-)Hex-HexNAc-HexNAc+HexNAc1
					5475	5470	1124.76	1124.51	4	4494	48.34	787.88	DVYSNLSHLPGAPGGPPAPQGLPYCPER	-	No	0	0.99	27.64	4.1	-2	TRUE	7.61	3-4-0-1-0	1-0-0-1-0	Hex-Hex-(Hex-)Hex-HexNAc-HexNAc+Hex1NeuAc1	Hex-(Hex-Hex-)Hex-HexNAc-HexNAc+Hex1NeuAc1
					5501	5492	873.381	873.047	3	2616.12	48.52	762.084	LFNVTPQDEQK	-	No	0	0.95	10.48	1.1	0	TRUE	8.31	4-3-0-0-0	1-0-0-0-0	HexNAc-Hex-(Hex-)Hex-HexNAc-HexNAc+Hex1	Hex-(HexNAc-Hex-)Hex-HexNAc-HexNAc+Hex1
					5506	5503	1366.2	1365.53	3	4093.56	48.55	1074.89	GNFSTEGCGCVCEPGWK	-	No	0	0.9	1.16	35.81	0	TRUE	7.28	5-7-0-0-0	1-0-0-0-0	HexNAc-Hex-Hex-Hex-(HexNAc-(Hex-Hex-)Hex-)Hex-HexNAc-HexNAc+Hex1	HexNAc-Hex-Hex-Hex-(Hex-HexNAc-(Hex-)Hex-)Hex-HexNAc-HexNAc+Hex1	Hex-HexNAc-Hex-Hex-Hex-(Hex-HexNAc-Hex-)Hex-HexNAc-HexNAc+Hex1	Hex-HexNAc-Hex-Hex-Hex-(HexNAc-(Hex-)Hex-)Hex-HexNAc-HexNAc+Hex1	HexNAc-Hex-Hex-(Hex-)Hex-(Hex-HexNAc-Hex-)Hex-HexNAc-HexNAc+Hex1	HexNAc-Hex-Hex-(Hex-)Hex-(HexNAc-(Hex-)Hex-)Hex-HexNAc-HexNAc+Hex1	HexNAc-Hex-Hex-(Hex-Hex-)Hex-(HexNAc-Hex-)Hex-HexNAc-HexNAc+Hex1	Hex-HexNAc-Hex-Hex-(Hex-)Hex-(HexNAc-Hex-)Hex-HexNAc-HexNAc+Hex1
					5508	5503	810.528	809.727	5	4043.6	48.56	525.589	KDTCTQECSYFNITK	-	No	0	0.78	0.27	12.73	0	TRUE	1.03	5-7-0-0-0	0-1-0-0-0	HexNAc-Hex-HexNAc-Hex-(HexNAc-(Hex-Hex-)Hex-)Hex-HexNAc-HexNAc+HexNAc1	Hex-HexNAc-(Hex-HexNAc-)Hex-(HexNAc-(Hex-)Hex-)Hex-HexNAc-HexNAc+HexNAc1	Hex-HexNAc-(HexNAc-)Hex-(Hex-HexNAc-(Hex-)Hex-)Hex-HexNAc-HexNAc+HexNAc1	Hex-HexNAc-(HexNAc-)Hex-(HexNAc-(Hex-Hex-)Hex-)Hex-HexNAc-HexNAc+HexNAc1	Hex-HexNAc-Hex-HexNAc-(HexNAc-)Hex-(Hex-Hex-)Hex-HexNAc-HexNAc+HexNAc1	Hex-HexNAc-Hex-HexNAc-(Hex-HexNAc-)Hex-(Hex-)Hex-HexNAc-HexNAc+HexNAc1	Hex-HexNAc-Hex-HexNAc-Hex-(Hex-HexNAc-Hex-)Hex-HexNAc-HexNAc+HexNAc1	Hex-HexNAc-Hex-HexNAc-Hex-(HexNAc-(Hex-)Hex-)Hex-HexNAc-HexNAc+HexNAc1	HexNAc-Hex-HexNAc-(Hex-)Hex-(Hex-HexNAc-Hex-)Hex-HexNAc-HexNAc+HexNAc1	HexNAc-Hex-HexNAc-(Hex-)Hex-(HexNAc-(Hex-)Hex-)Hex-HexNAc-HexNAc+HexNAc1	HexNAc-Hex-HexNAc-Hex-(Hex-HexNAc-(Hex-)Hex-)Hex-HexNAc-HexNAc+HexNAc1	Hex-HexNAc-Hex-HexNAc-(Hex-)Hex-(HexNAc-Hex-)Hex-HexNAc-HexNAc+HexNAc1	Hex-HexNAc-(Hex-HexNAc-)Hex-(Hex-HexNAc-Hex-)Hex-HexNAc-HexNAc+HexNAc1	HexNAc-Hex-HexNAc-(HexNAc-)Hex-(Hex-Hex-Hex-)Hex-HexNAc-HexNAc+HexNAc1	HexNAc-Hex-HexNAc-(HexNAc-)Hex-(Hex-(Hex-)Hex-)Hex-HexNAc-HexNAc+HexNAc1	HexNAc-Hex-HexNAc-(Hex-HexNAc-)Hex-(Hex-Hex-)Hex-HexNAc-HexNAc+HexNAc1	HexNAc-Hex-HexNAc-(Hex-Hex-)Hex-(HexNAc-Hex-)Hex-HexNAc-HexNAc+HexNAc1
					5510	5503	883.415	883.078	3	2646.21	48.58	464.254	NNVITLNITGK	-	No	0	0.9	6.11	0	-3	TRUE	1.75	4-4-0-0-0	2-1-0-0-0	Hex-(Hex-)Hex-HexNAc-HexNAc+Hex2HexNAc1
					5519	5514	842.067	841.735	3	2522.18	48.63	837.138	VEAAQNLTLPGSLR	-	No	0	0.87	5.23	0	0	TRUE	1.74	2-4-0-0-0	0-1-0-0-0	Hex-(Hex-)Hex-HexNAc-HexNAc+HexNAc1
					5543	5536	881.127	880.625	4	3518.47	48.78	540.255	YQTLNCSVNVNCVNIR	-	No	0	0.83	12.5	25.71	0	TRUE	4.37	3-5-1-0-0	0-1-0-0-0	Hex-Hex-(HexNAc-Hex-)Hex-HexNAc-(DeHex-)HexNAc+HexNAc1
					5545	5536	1234.5	1234.26	4	4933.01	48.79	616.536	ALAGLVYNASGSEHCYDIYR	-	No	0	0.89	2	16.02	-3	TRUE	5.25	4-7-1-2-0	1-0-0-2-0	Hex-(Hex-)Hex-(HexNAc-(Hex-Hex-)Hex-)Hex-HexNAc-(DeHex-)HexNAc+Hex1NeuAc2	Hex-(Hex-)Hex-(Hex-HexNAc-(Hex-)Hex-)Hex-HexNAc-(DeHex-)HexNAc+Hex1NeuAc2	Hex-Hex-(Hex-)Hex-(Hex-HexNAc-Hex-)Hex-HexNAc-(DeHex-)HexNAc+Hex1NeuAc2	Hex-Hex-(Hex-)Hex-(HexNAc-(Hex-)Hex-)Hex-HexNAc-(DeHex-)HexNAc+Hex1NeuAc2	Hex-Hex-(Hex-Hex-)Hex-(HexNAc-Hex-)Hex-HexNAc-(DeHex-)HexNAc+Hex1NeuAc2	Hex-Hex-Hex-(Hex-)Hex-(HexNAc-Hex-)Hex-HexNAc-(DeHex-)HexNAc+Hex1NeuAc2	Hex-HexNAc-Hex-(Hex-(Hex-Hex-)Hex-)Hex-HexNAc-(DeHex-)HexNAc+Hex1NeuAc2	Hex-(Hex-Hex-)Hex-(Hex-HexNAc-Hex-)Hex-HexNAc-(DeHex-)HexNAc+Hex1NeuAc2	Hex-Hex-Hex-Hex-Hex-(HexNAc-Hex-)Hex-HexNAc-(DeHex-)HexNAc+Hex1NeuAc2	Hex-Hex-Hex-Hex-(HexNAc-(Hex-)Hex-)Hex-HexNAc-(DeHex-)HexNAc+Hex1NeuAc2	Hex-Hex-Hex-(Hex-HexNAc-(Hex-)Hex-)Hex-HexNAc-(DeHex-)HexNAc+Hex1NeuAc2	HexNAc-(Hex-Hex-)Hex-(Hex-Hex-Hex-)Hex-HexNAc-(DeHex-)HexNAc+Hex1NeuAc2	HexNAc-(Hex-)Hex-(Hex-(Hex-Hex-)Hex-)Hex-HexNAc-(DeHex-)HexNAc+Hex1NeuAc2	HexNAc-(Hex-)Hex-(Hex-Hex-(Hex-)Hex-)Hex-HexNAc-(DeHex-)HexNAc+Hex1NeuAc2	HexNAc-(Hex-Hex-)Hex-(Hex-(Hex-)Hex-)Hex-HexNAc-(DeHex-)HexNAc+Hex1NeuAc2	Hex-Hex-(HexNAc-)Hex-(Hex-Hex-Hex-)Hex-HexNAc-(DeHex-)HexNAc+Hex1NeuAc2	Hex-Hex-(HexNAc-)Hex-(Hex-(Hex-)Hex-)Hex-HexNAc-(DeHex-)HexNAc+Hex1NeuAc2	Hex-HexNAc-(Hex-Hex-)Hex-(Hex-Hex-)Hex-HexNAc-(DeHex-)HexNAc+Hex1NeuAc2	Hex-Hex-Hex-Hex-(Hex-HexNAc-Hex-)Hex-HexNAc-(DeHex-)HexNAc+Hex1NeuAc2	Hex-Hex-Hex-(Hex-HexNAc-)Hex-(Hex-)Hex-HexNAc-(DeHex-)HexNAc+Hex1NeuAc2	Hex-Hex-Hex-Hex-(HexNAc-)Hex-(Hex-)Hex-HexNAc-(DeHex-)HexNAc+Hex1NeuAc2	Hex-HexNAc-(Hex-)Hex-(Hex-Hex-Hex-)Hex-HexNAc-(DeHex-)HexNAc+Hex1NeuAc2	Hex-Hex-Hex-(HexNAc-)Hex-(Hex-Hex-)Hex-HexNAc-(DeHex-)HexNAc+Hex1NeuAc2	HexNAc-(Hex-)Hex-(Hex-Hex-Hex-Hex-)Hex-HexNAc-(DeHex-)HexNAc+Hex1NeuAc2	Hex-HexNAc-(Hex-)Hex-(Hex-(Hex-)Hex-)Hex-HexNAc-(DeHex-)HexNAc+Hex1NeuAc2
					5550	5547	698.828	698.333	4	2789.3	48.83	489.235	NVTHLLQQELTEAQK	-	No	0	0.82	9.67	0	0	TRUE	0.09	2-3-1-0-0	0-0-1-0-0	Hex-(Hex-)Hex-HexNAc-HexNAc+DeHex1
					5574	5569	999.765	999.093	3	2994.26	48.98	599.287	NLTVCPDGALFEQK	-	No	0	0.96	4.53	12.79	0	TRUE	8.97	3-4-1-0-0	0-1-0-0-0	DeHex-HexNAc-Hex-(Hex-)Hex-HexNAc-HexNAc+HexNAc1
					5589	5580	1097.46	1096.47	3	3286.38	49.07	752.361	LGGWNITGPWAK	-	No	0	0.67	14.29	56.38	0	TRUE	5.94	5-6-0-0-0	0-1-0-0-0	HexNAc-(Hex-HexNAc-)Hex-(HexNAc-(Hex-)Hex-)Hex-HexNAc-HexNAc+HexNAc1	HexNAc-(HexNAc-)Hex-(Hex-HexNAc-(Hex-)Hex-)Hex-HexNAc-HexNAc+HexNAc1	HexNAc-(HexNAc-)Hex-(HexNAc-(Hex-Hex-)Hex-)Hex-HexNAc-HexNAc+HexNAc1	HexNAc-(Hex-HexNAc-)Hex-(Hex-HexNAc-Hex-)Hex-HexNAc-HexNAc+HexNAc1
					5600	5591	1265.17	1264.52	3	3790.53	49.14	645.625	GFQWVTGDNNTSYSR	-	No	0	0.95	0.62	1.98	-3	TRUE	5.35	4-5-1-1-0	2-0-0-1-0	Hex-Hex-Hex-(Hex-)Hex-HexNAc-(DeHex-)HexNAc+Hex2NeuAc1	Hex-Hex-(Hex-Hex-)Hex-HexNAc-(DeHex-)HexNAc+Hex2NeuAc1
					5618	5613	1156.53	1156.19	3	3465.55	49.26	750.299	NLSQDVNGTLVSIYAVPEK	-	No	0	0.96	7.54	3.29	-2	TRUE	6.76	3-5-0-0-0	1-1-0-0-0	Hex-Hex-(Hex-)Hex-HexNAc-HexNAc+Hex1HexNAc1	Hex-(Hex-Hex-)Hex-HexNAc-HexNAc+Hex1HexNAc1
					5633	5624	820.377	820.043	3	2457.11	49.36	454.717	GHTLTLNFTR	-	No	0	0.93	3.99	1.41	0	TRUE	4.67	4-3-0-0-0	1-0-0-0-0	HexNAc-Hex-(Hex-)Hex-HexNAc-HexNAc+Hex1	Hex-(HexNAc-Hex-)Hex-HexNAc-HexNAc+Hex1
					5644	5635	1162.53	1161.85	3	3482.53	49.43	810.421	SLCNSIISLNTTISCSEAQK	-	No	0	0.94	15.06	6.22	0	TRUE	2.73	3-4-0-0-0	0-1-0-0-0	HexNAc-Hex-(Hex-)Hex-HexNAc-HexNAc+HexNAc1	Hex-(HexNAc-Hex-)Hex-HexNAc-HexNAc+HexNAc1
					5682	5679	1013.65	1013.44	5	5062.15	49.68	972.781	AFSNSSYVLNPTTGELVFDPLSASDTGEYSCEAR	-	No	1	0.56	92.42	46.58	0	TRUE	3.76	2-6-0-0-0	0-1-0-0-0	Hex-Hex-Hex-(Hex-)Hex-HexNAc-HexNAc+HexNAc1	Hex-Hex-(Hex-Hex-)Hex-HexNAc-HexNAc+HexNAc1
					5702	5701	1482	1481.68	3	4442.01	49.81	1389.77	ALESSAPNLQLETSDVLANVTYLK	-	No	0	0.95	4.3	2.41	-3	TRUE	6.38	6-4-0-0-0	2-1-0-0-0	HexNAc-(HexNAc-)Hex-(Hex-)Hex-HexNAc-HexNAc+Hex2HexNAc1	HexNAc-Hex-(HexNAc-Hex-)Hex-HexNAc-HexNAc+Hex2HexNAc1
					5746	5745	1106.51	1106.18	3	3315.53	50.09	908.743	ANTTQPGIVEGGQVLK	-	No	0	0.95	4.58	0.29	-3	TRUE	7	6-3-0-0-0	3-0-0-0-0	HexNAc-Hex-(Hex-)Hex-HexNAc-HexNAc+Hex3	Hex-(HexNAc-Hex-)Hex-HexNAc-HexNAc+Hex3
					5816	5811	1423.61	1423.27	3	4266.78	50.56	1364.64	LANDTLIYFTSDQGAHVEEVSSK	-	No	0	0.9	18.12	3.96	-2	TRUE	7.1	3-7-0-0-0	1-1-0-0-0	Hex-Hex-Hex-Hex-(Hex-)Hex-HexNAc-HexNAc+Hex1HexNAc1	Hex-Hex-(Hex-Hex-Hex-)Hex-HexNAc-HexNAc+Hex1HexNAc1	Hex-Hex-Hex-(Hex-Hex-)Hex-HexNAc-HexNAc+Hex1HexNAc1
					5820	5811	1144.15	1143.49	3	3427.44	50.58	743.685	SSCGKENTSDPSLVIAFGR	-	No	0	0.99	0.53	0.28	0	TRUE	10.61	3-4-1-0-0	0-1-0-0-0	HexNAc-Hex-(Hex-)Hex-HexNAc-(DeHex-)HexNAc+HexNAc1	Hex-(HexNAc-Hex-)Hex-HexNAc-(DeHex-)HexNAc+HexNAc1
					5840	5833	1123.48	1122.48	3	3364.43	50.71	900.429	DMSDGFISNLTIQR	-	No	0	0.96	9.27	0.53	-3	TRUE	7.69	4-5-1-0-0	2-0-1-0-0	Hex-Hex-Hex-(Hex-)Hex-HexNAc-HexNAc+Hex2DeHex1	Hex-Hex-(Hex-Hex-)Hex-HexNAc-HexNAc+Hex2DeHex1
					5869	5866	1074.46	1073.79	3	3218.36	50.9	600.622	DMSDGFISNLTIQR	-	No	0	0.61	19.56	17.78	-2	TRUE	2.88	4-5-0-0-0	0-2-0-0-0	HexNAc-(HexNAc-)Hex-(Hex-)Hex-HexNAc-HexNAc+HexNAc2	HexNAc-Hex-(HexNAc-Hex-)Hex-HexNAc-HexNAc+HexNAc2
					5884	5877	842.379	841.875	4	3363.47	50.99	428.213	YDLPASINFILNK	-	No	0	0.89	0.2	5.69	-2	TRUE	1.16	3-5-1-1-0	1-0-0-1-0	Hex-Hex-Hex-(Hex-)Hex-HexNAc-(DeHex-)HexNAc+Hex1NeuAc1	Hex-Hex-(Hex-Hex-)Hex-HexNAc-(DeHex-)HexNAc+Hex1NeuAc1
					5897	5888	1331.25	1330.91	3	3989.7	51.07	1050.28	TILVDNNTWNNTHISR	-	No	1	0.71	51	14.66	0	TRUE	1.84	4-7-1-0-0	0-1-0-0-0	Hex-(DeHex-)HexNAc-Hex-(HexNAc-(Hex-Hex-)Hex-)Hex-HexNAc-HexNAc+HexNAc1	Hex-(DeHex-)HexNAc-(Hex-HexNAc-)Hex-(Hex-Hex-)Hex-HexNAc-HexNAc+HexNAc1	Hex-(DeHex-)HexNAc-(HexNAc-)Hex-(Hex-(Hex-)Hex-)Hex-HexNAc-HexNAc+HexNAc1	Hex-(DeHex-)HexNAc-(HexNAc-)Hex-(Hex-Hex-Hex-)Hex-HexNAc-HexNAc+HexNAc1	Hex-(DeHex-)HexNAc-Hex-(Hex-HexNAc-(Hex-)Hex-)Hex-HexNAc-HexNAc+HexNAc1
					5900	5899	1027.43	1026.93	4	4103.69	51.09	599.287	NLTVCPDGALFEQK	-	No	0	0.92	5.88	49.19	-2	TRUE	8.09	4-6-1-2-0	1-0-0-1-0	NeuAc-Hex-HexNAc-Hex-(Hex-Hex-Hex-)Hex-HexNAc-(DeHex-)HexNAc+Hex1NeuAc1	NeuAc-Hex-HexNAc-Hex-(Hex-(Hex-)Hex-)Hex-HexNAc-(DeHex-)HexNAc+Hex1NeuAc1	NeuAc-Hex-HexNAc-(Hex-Hex-)Hex-(Hex-)Hex-HexNAc-(DeHex-)HexNAc+Hex1NeuAc1	NeuAc-Hex-HexNAc-(Hex-)Hex-(Hex-Hex-)Hex-HexNAc-(DeHex-)HexNAc+Hex1NeuAc1
					5902	5899	900.419	899.67	4	3594.65	51.11	518.785	VLHNGTLAELQGLPHIR	-	No	0	0.89	3.31	22.64	-3	TRUE	2.45	3-6-1-0-0	0-3-0-0-0	HexNAc-Hex-(Hex-)Hex-HexNAc-(DeHex-)HexNAc+HexNAc3	Hex-(HexNAc-Hex-)Hex-HexNAc-(DeHex-)HexNAc+HexNAc3
					5922	5921	872.389	871.887	4	3483.52	51.23	681	ANIQFGDNGTTISAVSNK	-	No	0	0.92	5.21	0.41	0	TRUE	3.08	5-3-1-0-0	1-0-0-0-0	HexNAc-(HexNAc-)Hex-(Hex-)Hex-HexNAc-(DeHex-)HexNAc+Hex1	HexNAc-Hex-(HexNAc-Hex-)Hex-HexNAc-(DeHex-)HexNAc+Hex1
					5930	5921	1277.23	1276.55	3	3826.64	51.28	969.422	LDMSQNVSLVTAELSK	-	No	0	0.82	57.46	14.58	-2	TRUE	1.02	4-7-1-0-0	1-0-1-0-0	Hex-Hex-Hex-Hex-(HexNAc-)Hex-(Hex-)Hex-HexNAc-HexNAc+Hex1DeHex1	Hex-Hex-Hex-(Hex-HexNAc-)Hex-(Hex-)Hex-HexNAc-HexNAc+Hex1DeHex1	Hex-HexNAc-(Hex-Hex-Hex-)Hex-(Hex-)Hex-HexNAc-HexNAc+Hex1DeHex1
					5935	5932	656.296	656.296	4	2621.15	51.32	577.28	INYTDPFSNQTVK	-	No	0	0.88	7.2	0	-1	TRUE	2.33	3-3-0-0-0	1-0-0-0-0	Hex-(Hex-)Hex-HexNAc-HexNAc+Hex1
					5944	5943	1060.48	1060.14	3	3177.41	51.37	763.07	ELNESENSVFQAVYGLQR	-	No	0	0.93	0.49	0	0	TRUE	2.84	3-3-0-0-0	1-0-0-0-0	Hex-(Hex-)Hex-HexNAc-HexNAc+Hex1
					5957	5954	806.098	805.595	4	3218.35	51.46	450.892	DMSDGFISNLTIQR	-	No	0	0.67	10.39	35.64	0	TRUE	1.52	4-5-0-0-0	0-1-0-0-0	HexNAc-Hex-(Hex-HexNAc-Hex-)Hex-HexNAc-HexNAc+HexNAc1	HexNAc-Hex-(HexNAc-(Hex-)Hex-)Hex-HexNAc-HexNAc+HexNAc1	Hex-HexNAc-Hex-(HexNAc-Hex-)Hex-HexNAc-HexNAc+HexNAc1	HexNAc-(Hex-)Hex-(HexNAc-Hex-)Hex-HexNAc-HexNAc+HexNAc1	HexNAc-(HexNAc-)Hex-(Hex-Hex-)Hex-HexNAc-HexNAc+HexNAc1	HexNAc-(Hex-HexNAc-)Hex-(Hex-)Hex-HexNAc-HexNAc+HexNAc1	Hex-HexNAc-(HexNAc-)Hex-(Hex-)Hex-HexNAc-HexNAc+HexNAc1
					6007	5998	1162.85	1162.85	3	3485.53	51.78	763.07	ELNESENSVFQAVYGLQR	-	No	0	0.96	13.57	0	-3	TRUE	2.59	3-4-1-0-0	1-1-1-0-0	Hex-(Hex-)Hex-HexNAc-HexNAc+Hex1HexNAc1DeHex1
					6012	6009	1256.22	1255.55	3	3763.62	51.82	792.819	IFIFNQTGIEAK	-	No	0	1	7.41	123.01	-2	TRUE	278.35	4-6-0-1-1	0-1-0-0-1	NeuAc-Hex-HexNAc-Hex-(HexNAc-(Hex-)Hex-)Hex-HexNAc-HexNAc+HexNAc1NeuGc1	NeuAc-Hex-HexNAc-Hex-(Hex-HexNAc-Hex-)Hex-HexNAc-HexNAc+HexNAc1NeuGc1	NeuAc-Hex-HexNAc-(HexNAc-)Hex-(Hex-Hex-)Hex-HexNAc-HexNAc+HexNAc1NeuGc1	NeuAc-Hex-HexNAc-(Hex-HexNAc-)Hex-(Hex-)Hex-HexNAc-HexNAc+HexNAc1NeuGc1	NeuAc-Hex-HexNAc-(Hex-)Hex-(HexNAc-Hex-)Hex-HexNAc-HexNAc+HexNAc1NeuGc1
					6032	6031	770.863	770.364	4	3077.43	51.95	626.997	TQNFTLLVQGSPELK	-	No	0	0.93	5.79	1.95	0	TRUE	3.89	3-4-1-0-0	1-0-0-0-0	Hex-Hex-(Hex-)Hex-HexNAc-(DeHex-)HexNAc+Hex1	Hex-(Hex-Hex-)Hex-HexNAc-(DeHex-)HexNAc+Hex1
					6040	6031	810.387	810.387	3	2428.14	52	526.949	LVQLFPNDTSLK	-	No	0	0.94	16.51	0	0	TRUE	2.71	2-4-0-0-0	0-1-0-0-0	Hex-(Hex-)Hex-HexNAc-HexNAc+HexNAc1
					6058	6053	884.724	884.39	3	2650.15	52.12	600.622	DMSDGFISNLTIQR	-	No	0	0.96	0.27	0	0	TRUE	5.34	2-4-0-0-0	0-1-0-0-0	Hex-(Hex-)Hex-HexNAc-HexNAc+HexNAc1
					6062	6053	860.858	860.61	4	3438.41	52.14	514.268	VNCSVYVQLEK	-	No	0	0.94	16.52	15.52	-3	TRUE	8.59	5-4-1-1-0	2-0-0-1-0	Hex-Hex-(HexNAc-Hex-)Hex-HexNAc-(DeHex-)HexNAc+Hex2NeuAc1
					6076	6075	867.693	867.357	3	2599.05	52.23	394.218	LCLNNDTK	-	No	0	0.65	11.71	25.64	-3	TRUE	0.66	4-5-0-0-0	1-2-0-0-0	Hex-(HexNAc-Hex-)Hex-HexNAc-HexNAc+Hex1HexNAc2	HexNAc-Hex-(Hex-)Hex-HexNAc-HexNAc+Hex1HexNAc2
					6078	6075	1202.2	1201.53	3	3601.56	52.25	1051.67	TILVDNNTWNNTHISR	-	No	0	0.95	8.34	1.59	-3	TRUE	7.05	6-3-0-0-0	3-0-0-0-0	HexNAc-Hex-(Hex-)Hex-HexNAc-HexNAc+Hex3	Hex-(HexNAc-Hex-)Hex-HexNAc-HexNAc+Hex3
					6084	6075	1207.53	1207.21	3	3618.6	52.29	910.125	LANDTLIYFTSDQGAHVEEVSSK	-	No	1	0.89	41.1	0	0	TRUE	0.34	3-3-0-0-0	1-0-0-0-0	Hex-(Hex-)Hex-HexNAc-HexNAc+Hex1
					6115	6108	1036.49	1036.23	4	4140.9	52.5	927.581	ALESSAPNLQLETSDVLANVTYLK	-	No	1	0.53	96.32	19.05	0	TRUE	2.48	3-5-1-0-0	0-0-1-0-0	Hex-Hex-(Hex-HexNAc-Hex-)Hex-HexNAc-HexNAc+DeHex1	Hex-Hex-(HexNAc-(Hex-)Hex-)Hex-HexNAc-HexNAc+DeHex1	Hex-Hex-Hex-(HexNAc-Hex-)Hex-HexNAc-HexNAc+DeHex1	Hex-(Hex-)Hex-(HexNAc-Hex-)Hex-HexNAc-HexNAc+DeHex1
					6124	6119	746.326	746.326	4	2981.27	52.55	395.464	FNVSLDSVPELR	-	No	0	0.98	1.64	2.47	0	TRUE	10.48	4-4-1-0-0	1-0-0-0-0	Hex-Hex-(HexNAc-Hex-)Hex-HexNAc-(DeHex-)HexNAc+Hex1
					6157	6152	1448.27	1447.62	3	4339.82	52.78	947.095	TVTISDHGTVTYNGSICGDDQNGPK	-	No	0	0.85	2.54	10.1	-3	TRUE	1.13	6-3-0-0-0	3-0-0-0-0	Hex-(HexNAc-Hex-)Hex-HexNAc-HexNAc+Hex3	HexNAc-Hex-(Hex-)Hex-HexNAc-HexNAc+Hex3
					6172	6163	1215.54	1214.87	3	3641.58	52.88	969.422	LDMSQNVSLVTAELSK	-	No	0	0.95	1.19	1.3	0	TRUE	7.58	7-3-0-0-0	1-0-0-0-0	HexNAc-(HexNAc-)Hex-(HexNAc-(HexNAc-)Hex-)Hex-HexNAc-HexNAc+Hex1
					6190	6185	876.07	875.737	3	2624.19	53	895.624	LNDTYVNVGLYSTK	-	No	0	0.86	6.41	0	-1	TRUE	2.05	2-3-1-0-0	0-0-1-0-0	Hex-(Hex-)Hex-HexNAc-HexNAc+DeHex1
					6201	6196	1159.19	1158.52	3	3472.54	53.08	845.441	NNQLALTLIDTNR	-	No	0	0.92	0.94	3.47	0	TRUE	6.4	5-6-0-0-0	1-0-0-0-0	Hex-Hex-Hex-(HexNAc-Hex-HexNAc-Hex-)Hex-HexNAc-HexNAc+Hex1	HexNAc-Hex-Hex-Hex-(HexNAc-(Hex-)Hex-)Hex-HexNAc-HexNAc+Hex1	Hex-HexNAc-Hex-Hex-Hex-(HexNAc-Hex-)Hex-HexNAc-HexNAc+Hex1	HexNAc-Hex-HexNAc-Hex-Hex-Hex-(Hex-)Hex-HexNAc-HexNAc+Hex1	HexNAc-Hex-Hex-(Hex-)Hex-(HexNAc-Hex-)Hex-HexNAc-HexNAc+Hex1	HexNAc-Hex-Hex-Hex-(Hex-HexNAc-Hex-)Hex-HexNAc-HexNAc+Hex1
					6216	6207	1308.58	1307.91	3	3920.72	53.17	1114.39	HLNASNPTEPATIIFTAAR	-	No	0	0.88	30.71	17.43	0	TRUE	4.23	4-4-1-1-0	1-0-0-0-0	NeuAc-Hex-HexNAc-Hex-(Hex-)Hex-HexNAc-(DeHex-)HexNAc+Hex1
					6219	6218	912.755	912.42	3	2734.24	53.19	547.611	SLVTQYLNATGNR	-	No	0	0.96	0.63	0.34	0	TRUE	5.89	4-3-0-0-0	1-0-0-0-0	HexNAc-Hex-(Hex-)Hex-HexNAc-HexNAc+Hex1	Hex-(HexNAc-Hex-)Hex-HexNAc-HexNAc+Hex1
					6227	6218	1284.54	1283.87	3	3848.58	53.24	838.378	DLYEYSWVQGPLHSNETDR	-	No	1	0.83	23.5	125.32	0	TRUE	0.7	2-7-0-0-0	0-1-0-0-0	Hex-Hex-Hex-Hex-(Hex-)Hex-HexNAc-HexNAc+HexNAc1	Hex-Hex-Hex-(Hex-Hex-)Hex-HexNAc-HexNAc+HexNAc1	Hex-Hex-(Hex-Hex-Hex-)Hex-HexNAc-HexNAc+HexNAc1
					6236	6229	1265.56	1265.05	2	2528.09	53.3	657.604	GSLSYLNVTR	-	No	0	0.78	1.84	20.71	0	TRUE	0.19	3-5-0-0-0	0-1-0-0-0	HexNAc-(Hex-)Hex-(Hex-)Hex-HexNAc-HexNAc+HexNAc1	Hex-HexNAc-Hex-(Hex-)Hex-HexNAc-HexNAc+HexNAc1	HexNAc-Hex-(Hex-Hex-)Hex-HexNAc-HexNAc+HexNAc1
					6265	6262	1333.29	1332.61	3	3994.82	53.5	926.966	ALESSAPNLQLETSDVLANVTYLK	-	No	0	0.97	0.86	0	-3	TRUE	7.7	3-5-0-0-0	1-2-0-0-0	Hex-(Hex-)Hex-HexNAc-HexNAc+Hex1HexNAc2
					6267	6262	998.175	997.672	4	3986.66	53.51	605.954	VEDEGNYTCLFVTFPQGSR	-	No	0	0.83	6.58	40.13	0	TRUE	3.92	4-5-1-0-0	0-1-0-0-0	HexNAc-Hex-(HexNAc-(Hex-)Hex-)Hex-HexNAc-(DeHex-)HexNAc+HexNAc1	HexNAc-Hex-(Hex-HexNAc-Hex-)Hex-HexNAc-(DeHex-)HexNAc+HexNAc1	HexNAc-(Hex-HexNAc-)Hex-(Hex-)Hex-HexNAc-(DeHex-)HexNAc+HexNAc1
					6287	6284	1056.47	1055.79	3	3164.35	53.65	437.235	AAENFTLLVK	-	No	0	0.9	0.57	6.09	-2	TRUE	2.24	4-5-1-1-0	1-1-0-0-0	NeuAc-Hex-HexNAc-Hex-(Hex-)Hex-HexNAc-(DeHex-)HexNAc+Hex1HexNAc1
					6296	6295	1413.99	1413.32	3	4236.95	53.72	1612.4	DGNASGTTLLEALDCILPPTRPTDKPLR	-	No	0	0.99	111.09	0	-2	TRUE	7.49	2-5-0-0-0	0-2-0-0-0	Hex-(Hex-)Hex-HexNAc-HexNAc+HexNAc2
					6326	6317	991.703	991.204	4	3960.79	53.92	750.299	NLSQDVNGTLVSIYAVPEK	-	No	0	0.92	2.96	5.81	0	TRUE	4.5	4-5-2-0-0	1-0-0-0-0	Hex-(DeHex-)HexNAc-Hex-(Hex-Hex-)Hex-HexNAc-(DeHex-)HexNAc+Hex1	Hex-(DeHex-)HexNAc-(Hex-)Hex-(Hex-)Hex-HexNAc-(DeHex-)HexNAc+Hex1	DeHex-HexNAc-(Hex-Hex-)Hex-(Hex-)Hex-HexNAc-(DeHex-)HexNAc+Hex1
					6348	6339	1291.86	1291.2	3	3870.59	54.06	599.287	NLTVCPDGALFEQK	-	No	0	0.9	1.11	6.78	-3	TRUE	3.72	5-6-2-0-0	2-0-1-0-0	HexNAc-Hex-Hex-(Hex-)Hex-(Hex-)Hex-HexNAc-(DeHex-)HexNAc+Hex2DeHex1	Hex-HexNAc-Hex-Hex-Hex-(Hex-)Hex-HexNAc-(DeHex-)HexNAc+Hex2DeHex1	HexNAc-Hex-Hex-Hex-(Hex-Hex-)Hex-HexNAc-(DeHex-)HexNAc+Hex2DeHex1	Hex-Hex-(Hex-)Hex-(HexNAc-Hex-)Hex-HexNAc-(DeHex-)HexNAc+Hex2DeHex1	Hex-Hex-Hex-Hex-(HexNAc-Hex-)Hex-HexNAc-(DeHex-)HexNAc+Hex2DeHex1	Hex-Hex-Hex-(HexNAc-(Hex-)Hex-)Hex-HexNAc-(DeHex-)HexNAc+Hex2DeHex1	Hex-Hex-Hex-(Hex-HexNAc-Hex-)Hex-HexNAc-(DeHex-)HexNAc+Hex2DeHex1
					6410	6405	1058.16	1057.49	3	3169.45	54.46	611.255	LATIANFSALGLEPGR	-	No	0	0.87	12.58	1.27	-3	TRUE	6.24	2-7-0-0-0	0-3-0-0-0	Hex-Hex-(Hex-)Hex-HexNAc-HexNAc+HexNAc3	Hex-(Hex-Hex-)Hex-HexNAc-HexNAc+HexNAc3
					6412	6405	1270.53	1270.18	3	3807.53	54.47	789.92	FNVSLDSVPELR	-	No	0	0.8	6.53	151.7	-2	TRUE	8.59	4-10-0-0-0	0-2-0-0-0	Hex-Hex-Hex-Hex-(Hex-HexNAc-(Hex-HexNAc-)Hex-)Hex-HexNAc-HexNAc+HexNAc2	Hex-Hex-Hex-(HexNAc-)Hex-(Hex-(Hex-HexNAc-)Hex-)Hex-HexNAc-HexNAc+HexNAc2	Hex-Hex-(Hex-HexNAc-)Hex-(Hex-(Hex-HexNAc-)Hex-)Hex-HexNAc-HexNAc+HexNAc2	Hex-HexNAc-(Hex-HexNAc-)Hex-(Hex-Hex-(Hex-)Hex-)Hex-HexNAc-HexNAc+HexNAc2	Hex-HexNAc-(Hex-HexNAc-)Hex-(Hex-(Hex-Hex-)Hex-)Hex-HexNAc-HexNAc+HexNAc2	Hex-HexNAc-(Hex-HexNAc-)Hex-(Hex-Hex-Hex-Hex-)Hex-HexNAc-HexNAc+HexNAc2	Hex-HexNAc-(HexNAc-)Hex-(Hex-Hex-Hex-(Hex-)Hex-)Hex-HexNAc-HexNAc+HexNAc2	Hex-HexNAc-(HexNAc-)Hex-(Hex-Hex-(Hex-Hex-)Hex-)Hex-HexNAc-HexNAc+HexNAc2	Hex-HexNAc-(HexNAc-)Hex-(Hex-Hex-Hex-Hex-Hex-)Hex-HexNAc-HexNAc+HexNAc2	Hex-Hex-Hex-(Hex-HexNAc-)Hex-(Hex-(HexNAc-)Hex-)Hex-HexNAc-HexNAc+HexNAc2	Hex-Hex-Hex-Hex-(Hex-)Hex-(HexNAc-(HexNAc-)Hex-)Hex-HexNAc-HexNAc+HexNAc2	Hex-Hex-Hex-(Hex-)Hex-(Hex-HexNAc-(HexNAc-)Hex-)Hex-HexNAc-HexNAc+HexNAc2	Hex-Hex-(Hex-Hex-Hex-)Hex-(HexNAc-(HexNAc-)Hex-)Hex-HexNAc-HexNAc+HexNAc2	Hex-Hex-(Hex-Hex-)Hex-(Hex-HexNAc-(HexNAc-)Hex-)Hex-HexNAc-HexNAc+HexNAc2	Hex-Hex-(Hex-Hex-)Hex-(HexNAc-(Hex-HexNAc-)Hex-)Hex-HexNAc-HexNAc+HexNAc2	Hex-Hex-(Hex-)Hex-(Hex-HexNAc-(Hex-HexNAc-)Hex-)Hex-HexNAc-HexNAc+HexNAc2	Hex-Hex-Hex-Hex-Hex-Hex-(HexNAc-(HexNAc-)Hex-)Hex-HexNAc-HexNAc+HexNAc2	Hex-Hex-Hex-Hex-Hex-(Hex-HexNAc-(HexNAc-)Hex-)Hex-HexNAc-HexNAc+HexNAc2	Hex-Hex-Hex-(Hex-Hex-)Hex-(HexNAc-(HexNAc-)Hex-)Hex-HexNAc-HexNAc+HexNAc2	Hex-Hex-Hex-Hex-(HexNAc-)Hex-(Hex-(HexNAc-)Hex-)Hex-HexNAc-HexNAc+HexNAc2	Hex-Hex-Hex-(Hex-)Hex-(HexNAc-(Hex-HexNAc-)Hex-)Hex-HexNAc-HexNAc+HexNAc2	Hex-HexNAc-(Hex-Hex-Hex-)Hex-(Hex-(HexNAc-)Hex-)Hex-HexNAc-HexNAc+HexNAc2	Hex-HexNAc-(Hex-Hex-)Hex-(Hex-(Hex-HexNAc-)Hex-)Hex-HexNAc-HexNAc+HexNAc2	Hex-Hex-Hex-Hex-Hex-(HexNAc-(Hex-HexNAc-)Hex-)Hex-HexNAc-HexNAc+HexNAc2
					6419	6416	1093.81	1093.14	3	3276.39	54.52	865.417	YSVANDTGFVDIPK	-	No	0	0.92	5.25	0.54	-3	TRUE	4.4	4-4-0-1-0	2-0-0-1-0	Hex-Hex-(Hex-)Hex-HexNAc-HexNAc+Hex2NeuAc1	Hex-(Hex-Hex-)Hex-HexNAc-HexNAc+Hex2NeuAc1
					6423	6416	1106.52	1106.18	3	3315.52	54.55	907.765	ANTTQPGIVEGGQVLK	-	No	0	0.57	25.94	9	0	TRUE	5.74	6-3-0-0-0	1-0-0-0-0	HexNAc-(HexNAc-)Hex-(HexNAc-Hex-)Hex-HexNAc-HexNAc+Hex1	HexNAc-Hex-(HexNAc-(HexNAc-)Hex-)Hex-HexNAc-HexNAc+Hex1
					6425	6416	1049.49	1048.82	3	3143.45	54.56	1065.93	LNYSLPTGQWVGVQLPR	-	No	0	0.89	6.92	0	-2	TRUE	4.12	2-5-0-0-0	0-2-0-0-0	Hex-(Hex-)Hex-HexNAc-HexNAc+HexNAc2
					6428	6427	1160.22	1159.56	3	3475.65	54.58	1220.13	QVALQTFGNQTTIIPAGGAGYK	-	No	0	0.99	104.09	0	0	FALSE	3.3	3-3-1-0-0	1-0-0-0-0	Hex-(Hex-)Hex-HexNAc-(DeHex-)HexNAc+Hex1
					6434	6427	920.404	920.068	3	2757.18	54.62	514.268	VNCSVYVQLEK	-	No	0	0.84	2.56	3.84	0	TRUE	0.8	3-5-0-0-0	0-1-0-0-0	HexNAc-(Hex-)Hex-(Hex-)Hex-HexNAc-HexNAc+HexNAc1	Hex-HexNAc-Hex-(Hex-)Hex-HexNAc-HexNAc+HexNAc1	HexNAc-Hex-(Hex-Hex-)Hex-HexNAc-HexNAc+HexNAc1
					6445	6438	932.423	932.093	3	2793.26	54.7	540.616	AVLVNGTECLLAR	-	No	0	0.72	28.28	0	-3	TRUE	6.64	2-6-0-0-0	0-3-0-0-0	Hex-(Hex-)Hex-HexNAc-HexNAc+HexNAc3
					6447	6438	904.429	904.092	3	2709.26	54.71	837.138	VEAAQNLTLPGSLR	-	No	0	0.92	1.71	0	-2	TRUE	2.88	3-3-1-0-0	1-0-1-0-0	Hex-(Hex-)Hex-HexNAc-HexNAc+Hex1DeHex1
					6450	6449	940.432	940.432	3	2818.27	54.73	789.92	LVQLFPNDTSLK	-	No	0	0.95	3.52	15.99	0	TRUE	8.23	4-3-1-0-0	1-0-0-0-0	DeHex-HexNAc-Hex-(Hex-)Hex-HexNAc-HexNAc+Hex1
					6467	6460	1151.13	1150.72	5	5748.57	54.85	980.416	ELEVTDDGETHEAQDDSETVLAGPTSPIPSLGNVSETASGSVTQPK	-	No	0	0.92	4.2	0	0	TRUE	4.16	2-4-0-0-0	0-1-0-0-0	Hex-(Hex-)Hex-HexNAc-HexNAc+HexNAc1
					6496	6493	940.433	940.433	3	2818.28	55.07	810.421	AVLVNGTECLLAR	-	No	0	0.89	5.18	11.32	0	TRUE	2.17	3-4-1-0-0	1-0-0-0-0	Hex-Hex-(Hex-)Hex-HexNAc-(DeHex-)HexNAc+Hex1	Hex-(Hex-Hex-)Hex-HexNAc-(DeHex-)HexNAc+Hex1
					6509	6504	798.357	798.357	3	2392.05	55.16	514.268	VNCSVYVQLEK	-	No	0	0.86	5.21	0	0	TRUE	0.51	2-4-0-0-0	0-1-0-0-0	Hex-(Hex-)Hex-HexNAc-HexNAc+HexNAc1
					6520	6515	708.839	708.589	4	2830.32	55.24	445.237	GVFITNETGQPLIGK	-	No	0	0.96	3.51	7.64	0	TRUE	7.25	3-4-0-0-0	1-0-0-0-0	Hex-Hex-(Hex-)Hex-HexNAc-HexNAc+Hex1	Hex-(Hex-Hex-)Hex-HexNAc-HexNAc+Hex1
					6524	6515	772.585	772.089	4	3084.33	55.26	468.01	DNATEEEILVYLEK	-	No	0	0.71	12.45	4.42	-2	TRUE	1.66	3-5-0-0-0	1-1-0-0-0	Hex-Hex-(Hex-)Hex-HexNAc-HexNAc+Hex1HexNAc1	Hex-(Hex-Hex-)Hex-HexNAc-HexNAc+Hex1HexNAc1
					6535	6526	656.294	656.294	4	2621.14	55.33	577.28	INYTDPFSNQTVK	-	No	0	0.84	7.64	0	-1	TRUE	0.93	3-3-0-0-0	1-0-0-0-0	Hex-(Hex-)Hex-HexNAc-HexNAc+Hex1
					6538	6537	1243.22	1242.88	3	3725.63	55.35	1114.38	HLNASNPTEPATIIFTAAR	-	No	1	0.85	145.53	8.79	0	TRUE	1.7	2-8-0-0-0	0-1-0-0-0	Hex-Hex-Hex-Hex-Hex-(Hex-)Hex-HexNAc-HexNAc+HexNAc1	Hex-Hex-Hex-Hex-(Hex-Hex-)Hex-HexNAc-HexNAc+HexNAc1	Hex-Hex-Hex-(Hex-Hex-Hex-)Hex-HexNAc-HexNAc+HexNAc1
					6549	6548	1212.89	1212.22	3	3633.63	55.44	730.844	ILLTCSLNDSATEVTGHR	-	No	0	0.96	8.93	4.26	-2	TRUE	6.52	5-3-1-0-0	2-0-0-0-0	HexNAc-Hex-(Hex-)Hex-HexNAc-(DeHex-)HexNAc+Hex2	Hex-(HexNAc-Hex-)Hex-HexNAc-(DeHex-)HexNAc+Hex2
					6555	6548	988.629	988.42	5	4937.06	55.48	690.335	ALYELAGGTNFSDTVQADPQTVTR	-	No	0	0.97	104.95	46.87	-2	TRUE	4.75	4-7-1-1-0	0-0-1-1-0	Hex-Hex-(HexNAc-Hex-HexNAc-)Hex-(Hex-Hex-)Hex-HexNAc-HexNAc+DeHex1NeuAc1	HexNAc-Hex-Hex-(Hex-HexNAc-)Hex-(Hex-Hex-)Hex-HexNAc-HexNAc+DeHex1NeuAc1	Hex-HexNAc-(HexNAc-Hex-Hex-)Hex-(Hex-Hex-)Hex-HexNAc-HexNAc+DeHex1NeuAc1	HexNAc-Hex-Hex-(HexNAc-)Hex-(Hex-(Hex-)Hex-)Hex-HexNAc-HexNAc+DeHex1NeuAc1	HexNAc-Hex-HexNAc-(Hex-)Hex-(Hex-(Hex-)Hex-)Hex-HexNAc-HexNAc+DeHex1NeuAc1	HexNAc-Hex-HexNAc-(Hex-Hex-)Hex-(Hex-Hex-)Hex-HexNAc-HexNAc+DeHex1NeuAc1
					6557	6548	731.598	731.096	4	2920.36	55.49	636.269	RPNQSQPLPPSSLQR	-	No	0	0.94	72.98	2.92	0	TRUE	6.02	2-5-0-0-0	0-1-0-0-0	Hex-Hex-(Hex-)Hex-HexNAc-HexNAc+HexNAc1	Hex-(Hex-Hex-)Hex-HexNAc-HexNAc+HexNAc1
					6573	6570	778.62	778.119	4	3108.45	55.6	468.01	RPPLAELAALNLSGSR	-	No	0	0.99	0.99	1.95	0	TRUE	10.76	4-3-1-0-0	1-0-0-0-0	HexNAc-Hex-(Hex-)Hex-HexNAc-(DeHex-)HexNAc+Hex1	Hex-(HexNAc-Hex-)Hex-HexNAc-(DeHex-)HexNAc+Hex1
					6575	6570	870.419	869.917	4	3475.64	55.61	813.233	QVALQTFGNQTTIIPAGGAGYK	-	No	0	0.53	21.68	0	-1	TRUE	0.56	3-3-1-0-0	1-0-0-0-0	Hex-(Hex-)Hex-HexNAc-(DeHex-)HexNAc+Hex1
					6588	6581	917.424	916.755	3	2747.24	55.7	525.288	DLVVQQLVNVSR	-	No	0	0.94	3.61	0	-3	TRUE	4.44	2-6-0-0-0	0-3-0-0-0	Hex-(Hex-)Hex-HexNAc-HexNAc+HexNAc3
					6606	6603	1104.96	1104.21	4	4412.8	55.82	972.617	HNNDTQHIWESDSNEFSVIADPR	-	No	1	0.96	137.34	258.94	0	TRUE	3.65	2-8-0-0-0	0-1-0-0-0	Hex-Hex-Hex-(Hex-Hex-Hex-)Hex-HexNAc-HexNAc+HexNAc1	Hex-Hex-Hex-Hex-(Hex-Hex-)Hex-HexNAc-HexNAc+HexNAc1	Hex-Hex-Hex-Hex-Hex-(Hex-)Hex-HexNAc-HexNAc+HexNAc1
					6632	6625	1173.16	1172.83	3	3515.47	55.99	813.428	AGPNGTLFVADAYK	-	No	1	0.71	47.06	49.63	-2	TRUE	2.22	4-7-1-0-0	0-2-0-0-0	HexNAc-Hex-HexNAc-(Hex-)Hex-(Hex-)Hex-HexNAc-(DeHex-)HexNAc+HexNAc2	Hex-HexNAc-(Hex-)Hex-(HexNAc-Hex-)Hex-HexNAc-(DeHex-)HexNAc+HexNAc2	HexNAc-Hex-Hex-(HexNAc-)Hex-(Hex-)Hex-HexNAc-(DeHex-)HexNAc+HexNAc2	Hex-Hex-(HexNAc-)Hex-(HexNAc-Hex-)Hex-HexNAc-(DeHex-)HexNAc+HexNAc2
					6648	6647	817.643	817.392	4	3265.54	56.1	470.5	IPLVNISLLPK	-	No	0	0.95	0.72	13.43	0	TRUE	6.73	4-5-1-1-0	0-0-0-1-0	HexNAc-(HexNAc-)Hex-(Hex-Hex-Hex-)Hex-HexNAc-(DeHex-)HexNAc+NeuAc1	HexNAc-(Hex-HexNAc-)Hex-(Hex-Hex-)Hex-HexNAc-(DeHex-)HexNAc+NeuAc1	Hex-HexNAc-(HexNAc-)Hex-(Hex-Hex-)Hex-HexNAc-(DeHex-)HexNAc+NeuAc1	Hex-(HexNAc-)Hex-(Hex-HexNAc-Hex-)Hex-HexNAc-(DeHex-)HexNAc+NeuAc1	Hex-(HexNAc-)Hex-(HexNAc-(Hex-)Hex-)Hex-HexNAc-(DeHex-)HexNAc+NeuAc1	Hex-(Hex-HexNAc-)Hex-(HexNAc-Hex-)Hex-HexNAc-(DeHex-)HexNAc+NeuAc1	Hex-Hex-(HexNAc-)Hex-(HexNAc-Hex-)Hex-HexNAc-(DeHex-)HexNAc+NeuAc1	HexNAc-(HexNAc-)Hex-(Hex-(Hex-)Hex-)Hex-HexNAc-(DeHex-)HexNAc+NeuAc1
					6652	6647	1077.82	1077.49	3	3229.45	56.12	995.338	EEEAIQLDGLNASQIR	-	No	1	0.92	34.51	100	0	TRUE	4.99	4-3-1-0-0	1-0-0-0-0	HexNAc-Hex-(Hex-)Hex-HexNAc-(DeHex-)HexNAc+Hex1	Hex-(HexNAc-Hex-)Hex-HexNAc-(DeHex-)HexNAc+Hex1
					6656	6647	1583.7	1582.7	2	3163.38	56.14	995.359	EEEAIQLDGLNASQIR	-	No	1	0.87	62.08	14.5	0	TRUE	2.24	2-6-0-0-0	0-1-0-0-0	Hex-Hex-Hex-(Hex-)Hex-HexNAc-HexNAc+HexNAc1	Hex-Hex-(Hex-Hex-)Hex-HexNAc-HexNAc+HexNAc1
					6678	6669	747.329	747.08	4	2984.29	56.28	376.694	LLNINPNK	-	No	0	0.97	28	20.71	-3	TRUE	4.34	4-5-1-1-0	1-1-1-0-0	NeuAc-Hex-HexNAc-Hex-(Hex-)Hex-HexNAc-HexNAc+Hex1HexNAc1DeHex1
					6689	6680	1010.46	1010.13	3	3027.36	56.36	793.153	IFIFNQTGIEAK	-	No	1	1	75.24	115.02	0	TRUE	1.53	5-3-1-0-0	1-0-0-0-0	HexNAc-(DeHex-HexNAc-)Hex-(Hex-)Hex-HexNAc-HexNAc+Hex1	HexNAc-Hex-(DeHex-HexNAc-Hex-)Hex-HexNAc-HexNAc+Hex1
					6698	6691	977.437	977.101	3	2928.28	56.42	865.417	YSVANDTGFVDIPK	-	No	1	0.99	103.83	3.43	0	TRUE	5.59	3-4-1-0-0	0-0-1-0-0	Hex-Hex-(HexNAc-Hex-)Hex-HexNAc-HexNAc+DeHex1
					6707	6702	1065.47	1064.8	3	3191.38	56.48	813.428	AGPNGTLFVADAYK	-	No	0	0.9	39.98	12.32	0	TRUE	5.28	4-5-1-0-0	0-1-0-0-0	HexNAc-Hex-(Hex-HexNAc-Hex-)Hex-HexNAc-(DeHex-)HexNAc+HexNAc1	HexNAc-(Hex-HexNAc-)Hex-(Hex-)Hex-HexNAc-(DeHex-)HexNAc+HexNAc1	HexNAc-Hex-(HexNAc-(Hex-)Hex-)Hex-HexNAc-(DeHex-)HexNAc+HexNAc1
					6722	6713	1149.85	1149.85	3	3446.53	56.57	730.844	ILLTCSLNDSATEVTGHR	-	No	0	0.82	15.88	2.87	-2	TRUE	0.28	4-4-0-0-0	2-0-0-0-0	Hex-Hex-(Hex-)Hex-HexNAc-HexNAc+Hex2	Hex-(Hex-Hex-)Hex-HexNAc-HexNAc+Hex2
					6725	6724	783.086	782.584	4	3126.31	56.6	448.49	LNDTYVNVGLYSTK	-	No	0	0.97	0.38	1.37	0	TRUE	9.37	2-7-0-0-0	0-1-0-0-0	Hex-Hex-(Hex-Hex-Hex-)Hex-HexNAc-HexNAc+HexNAc1	Hex-Hex-Hex-Hex-(Hex-)Hex-HexNAc-HexNAc+HexNAc1	Hex-Hex-Hex-(Hex-Hex-)Hex-HexNAc-HexNAc+HexNAc1
					6729	6724	983.418	982.665	4	3926.63	56.63	972.43	HNNDTQHIWESDSNEFSVIADPR	-	No	1	0.91	172.4	80.78	0	TRUE	0.12	2-5-0-0-0	0-1-0-0-0	Hex-Hex-(Hex-)Hex-HexNAc-HexNAc+HexNAc1	Hex-(Hex-Hex-)Hex-HexNAc-HexNAc+HexNAc1
					6740	6735	931.432	930.766	3	2789.28	56.7	889.255	GVFITNETGQPLIGK	-	No	0	0.67	8.26	0.26	0	TRUE	0.35	2-5-0-0-0	0-1-0-0-0	Hex-Hex-(Hex-)Hex-HexNAc-HexNAc+HexNAc1	Hex-(Hex-Hex-)Hex-HexNAc-HexNAc+HexNAc1
					6760	6757	1159.83	1159.17	3	3474.48	56.84	820.913	ALAGLVYNASGSEHCYDIYR	-	No	0	0.94	5.88	0.65	0	TRUE	2.39	2-5-0-0-0	0-1-0-0-0	Hex-Hex-(Hex-)Hex-HexNAc-HexNAc+HexNAc1	Hex-(Hex-Hex-)Hex-HexNAc-HexNAc+HexNAc1
					6766	6757	823.38	822.631	4	3286.5	56.87	468.01	RPPLAELAALNLSGSR	-	No	0	0.97	4.44	19.85	-2	TRUE	10.03	4-5-0-0-0	0-2-0-0-0	HexNAc-(HexNAc-)Hex-(Hex-)Hex-HexNAc-HexNAc+HexNAc2	HexNAc-Hex-(HexNAc-Hex-)Hex-HexNAc-HexNAc+HexNAc2
					6780	6779	1213.85	1213.18	3	3636.53	56.96	1231.99	ALAGLVYNASGSEHCYDIYR	-	No	1	0.81	131.68	4.95	0	FALSE	0.81	2-6-0-0-0	0-1-0-0-0	Hex-Hex-Hex-(Hex-)Hex-HexNAc-HexNAc+HexNAc1	Hex-Hex-(Hex-Hex-)Hex-HexNAc-HexNAc+HexNAc1
					6788	6779	1090.5	1090.16	3	3267.47	57.01	889.161	GVFITNETGQPLIGK	-	No	0	0.8	42.38	6.12	0	TRUE	4.93	3-4-1-1-0	0-0-0-1-0	HexNAc-Hex-(Hex-Hex-)Hex-HexNAc-(DeHex-)HexNAc+NeuAc1	Hex-HexNAc-Hex-(Hex-)Hex-HexNAc-(DeHex-)HexNAc+NeuAc1	HexNAc-(Hex-)Hex-(Hex-)Hex-HexNAc-(DeHex-)HexNAc+NeuAc1
					6791	6790	1223.19	1222.51	3	3664.51	57.04	880.411	NHSIFLADINQER	-	No	1	0.62	9.02	34	0	TRUE	1.2	4-8-0-0-0	0-1-0-0-0	Hex-Hex-(HexNAc-)Hex-(Hex-(Hex-HexNAc-)Hex-)Hex-HexNAc-HexNAc+HexNAc1	Hex-Hex-(Hex-HexNAc-)Hex-(Hex-(HexNAc-)Hex-)Hex-HexNAc-HexNAc+HexNAc1	Hex-Hex-Hex-(HexNAc-)Hex-(Hex-(HexNAc-)Hex-)Hex-HexNAc-HexNAc+HexNAc1	Hex-HexNAc-(Hex-)Hex-(Hex-(Hex-HexNAc-)Hex-)Hex-HexNAc-HexNAc+HexNAc1	Hex-HexNAc-(Hex-)Hex-(Hex-Hex-(HexNAc-)Hex-)Hex-HexNAc-HexNAc+HexNAc1	Hex-HexNAc-(Hex-Hex-)Hex-(Hex-(HexNAc-)Hex-)Hex-HexNAc-HexNAc+HexNAc1	Hex-Hex-Hex-Hex-(HexNAc-(Hex-HexNAc-)Hex-)Hex-HexNAc-HexNAc+HexNAc1	Hex-Hex-Hex-Hex-Hex-(HexNAc-(HexNAc-)Hex-)Hex-HexNAc-HexNAc+HexNAc1	Hex-Hex-(Hex-)Hex-(HexNAc-(Hex-HexNAc-)Hex-)Hex-HexNAc-HexNAc+HexNAc1	Hex-Hex-(Hex-)Hex-(Hex-HexNAc-(HexNAc-)Hex-)Hex-HexNAc-HexNAc+HexNAc1	Hex-Hex-(Hex-Hex-)Hex-(HexNAc-(HexNAc-)Hex-)Hex-HexNAc-HexNAc+HexNAc1	Hex-Hex-Hex-(Hex-)Hex-(HexNAc-(HexNAc-)Hex-)Hex-HexNAc-HexNAc+HexNAc1	Hex-HexNAc-(HexNAc-)Hex-(Hex-Hex-Hex-Hex-)Hex-HexNAc-HexNAc+HexNAc1	Hex-Hex-Hex-Hex-(Hex-HexNAc-(HexNAc-)Hex-)Hex-HexNAc-HexNAc+HexNAc1	Hex-HexNAc-(HexNAc-)Hex-(Hex-Hex-(Hex-)Hex-)Hex-HexNAc-HexNAc+HexNAc1	Hex-HexNAc-(HexNAc-)Hex-(Hex-(Hex-Hex-)Hex-)Hex-HexNAc-HexNAc+HexNAc1	Hex-Hex-(HexNAc-)Hex-(Hex-Hex-(HexNAc-)Hex-)Hex-HexNAc-HexNAc+HexNAc1	Hex-HexNAc-(Hex-HexNAc-)Hex-(Hex-(Hex-)Hex-)Hex-HexNAc-HexNAc+HexNAc1	Hex-HexNAc-(Hex-HexNAc-)Hex-(Hex-Hex-Hex-)Hex-HexNAc-HexNAc+HexNAc1
					6793	6790	879.877	879.371	4	3513.45	57.05	650.63	GGGDPWTNGSGLALCQR	-	No	0	0.78	4.27	41.91	0	TRUE	2.99	4-5-1-0-0	0-1-0-0-0	HexNAc-Hex-(Hex-HexNAc-Hex-)Hex-HexNAc-(DeHex-)HexNAc+HexNAc1	HexNAc-Hex-(HexNAc-(Hex-)Hex-)Hex-HexNAc-(DeHex-)HexNAc+HexNAc1	Hex-HexNAc-Hex-(HexNAc-Hex-)Hex-HexNAc-(DeHex-)HexNAc+HexNAc1	HexNAc-(Hex-)Hex-(HexNAc-Hex-)Hex-HexNAc-(DeHex-)HexNAc+HexNAc1	HexNAc-(Hex-HexNAc-)Hex-(Hex-)Hex-HexNAc-(DeHex-)HexNAc+HexNAc1	Hex-HexNAc-(HexNAc-)Hex-(Hex-)Hex-HexNAc-(DeHex-)HexNAc+HexNAc1	HexNAc-(HexNAc-)Hex-(Hex-Hex-)Hex-HexNAc-(DeHex-)HexNAc+HexNAc1
					6806	6801	1169.16	1168.84	3	3503.49	57.14	900.429	DMSDGFISNLTIQR	-	No	0	0.84	2.25	3.69	0	TRUE	1.74	7-3-0-0-0	1-0-0-0-0	HexNAc-(HexNAc-)Hex-(HexNAc-(HexNAc-)Hex-)Hex-HexNAc-HexNAc+Hex1
					6830	6823	1043.48	1043.15	3	3126.42	57.3	895.624	SGVINLTEEVLWVK	-	No	0	0.91	23.59	4.53	-3	TRUE	4.69	2-7-0-0-0	0-3-0-0-0	Hex-Hex-(Hex-)Hex-HexNAc-HexNAc+HexNAc3	Hex-(Hex-Hex-)Hex-HexNAc-HexNAc+HexNAc3
					6837	6834	1105.48	1105.14	3	3312.41	57.35	1231.95	ALAGLVYNASGSEHCYDIYR	-	No	1	0.72	114.17	0	-1	TRUE	3.83	2-4-0-0-0	0-1-0-0-0	Hex-(Hex-)Hex-HexNAc-HexNAc+HexNAc1
					6841	6834	979.784	979.453	3	2935.34	57.37	1050.4	TILVDNNTWNNTHISR	-	No	0	0.87	19.85	0	0	TRUE	3.99	2-3-1-0-0	0-0-1-0-0	Hex-(Hex-)Hex-HexNAc-HexNAc+DeHex1
					6859	6856	1176.16	1175.49	3	3523.46	57.49	854.752	ENTSDPSLVIAFGR	-	No	0	0.55	13.95	4.71	-3	TRUE	1.11	3-6-1-1-0	1-0-1-1-0	Hex-Hex-Hex-Hex-(Hex-)Hex-HexNAc-HexNAc+Hex1DeHex1NeuAc1	Hex-Hex-Hex-(Hex-Hex-)Hex-HexNAc-HexNAc+Hex1DeHex1NeuAc1	Hex-Hex-(Hex-Hex-Hex-)Hex-HexNAc-HexNAc+Hex1DeHex1NeuAc1
					6881	6878	925.433	925.099	3	2772.28	57.64	787.428	DLVVQQLVNVSR	-	No	0	0.99	104.49	6.28	0	TRUE	3.52	3-4-1-0-0	0-0-1-0-0	HexNAc-Hex-(Hex-Hex-)Hex-HexNAc-HexNAc+DeHex1	Hex-HexNAc-Hex-(Hex-)Hex-HexNAc-HexNAc+DeHex1	HexNAc-(Hex-)Hex-(Hex-)Hex-HexNAc-HexNAc+DeHex1
					6883	6878	1237.21	1236.55	3	3706.62	57.65	1246.59	LGQAPANWYNDTYPLSPPQR	-	No	0	0.98	65.73	7.36	0	TRUE	1.78	3-5-0-0-0	1-0-0-0-0	Hex-Hex-Hex-(Hex-)Hex-HexNAc-HexNAc+Hex1	Hex-Hex-(Hex-Hex-)Hex-HexNAc-HexNAc+Hex1
					6885	6878	1350.24	1350.24	3	4047.7	57.66	1436.94	GFYLDGSDTIVCDSNSTWDPPVPK	-	No	0	0.58	30.71	0	-3	TRUE	4.58	2-6-0-0-0	0-3-0-0-0	Hex-(Hex-)Hex-HexNAc-HexNAc+HexNAc3
					6912	6911	1185.15	1184.83	3	3551.46	57.86	730.844	DIYTFDGALNK	-	No	0	0.94	5.23	9.96	-3	TRUE	6.53	5-7-1-0-0	3-0-0-0-0	Hex-Hex-Hex-(Hex-Hex-Hex-)Hex-HexNAc-(DeHex-)HexNAc+Hex3	Hex-Hex-Hex-Hex-(Hex-Hex-)Hex-HexNAc-(DeHex-)HexNAc+Hex3	Hex-Hex-Hex-Hex-Hex-(Hex-)Hex-HexNAc-(DeHex-)HexNAc+Hex3
					6920	6911	1025.47	1025.13	3	3072.37	57.92	570.614	YDLPASINFILNK	-	No	0	0.88	2.18	2.95	0	TRUE	0.4	3-5-1-0-0	0-1-0-0-0	HexNAc-(Hex-)Hex-(Hex-)Hex-HexNAc-(DeHex-)HexNAc+HexNAc1	Hex-HexNAc-Hex-(Hex-)Hex-HexNAc-(DeHex-)HexNAc+HexNAc1	HexNAc-Hex-(Hex-Hex-)Hex-HexNAc-(DeHex-)HexNAc+HexNAc1
					6925	6922	1296.56	1296.22	3	3885.64	57.96	1242.37	VDNITDQFCNASVVDPACVR	-	No	0	0.84	10.6	0.88	0	TRUE	6.53	4-4-1-0-0	1-0-0-0-0	HexNAc-Hex-(Hex-Hex-)Hex-HexNAc-(DeHex-)HexNAc+Hex1	Hex-HexNAc-Hex-(Hex-)Hex-HexNAc-(DeHex-)HexNAc+Hex1	HexNAc-(Hex-)Hex-(Hex-)Hex-HexNAc-(DeHex-)HexNAc+Hex1
					6931	6922	792.624	792.378	4	3165.48	58	468.01	RPPLAELAALNLSGSR	-	No	0	0.96	1.22	3.17	-2	TRUE	6.4	5-3-0-0-0	2-0-0-0-0	Hex-(HexNAc-Hex-)Hex-HexNAc-HexNAc+Hex2	HexNAc-Hex-(Hex-)Hex-HexNAc-HexNAc+Hex2
					6934	6933	1247.83	1247.16	3	3738.47	58.02	828.355	NATYGYVLDDPDPDDGFNYK	-	No	0	0.94	8.27	16.48	0	TRUE	9.8	4-4-0-0-0	1-0-0-0-0	Hex-Hex-(HexNAc-Hex-)Hex-HexNAc-HexNAc+Hex1
					6936	6933	977.217	976.965	4	3903.83	58.04	888.458	FNPNISWQPIPVHTVPITEDR	-	No	0	0.95	13.89	3.47	0	TRUE	6.07	4-3-1-0-0	1-0-0-0-0	HexNAc-Hex-(Hex-)Hex-HexNAc-(DeHex-)HexNAc+Hex1	Hex-(HexNAc-Hex-)Hex-HexNAc-(DeHex-)HexNAc+Hex1
					6940	6933	746.315	745.648	3	2233.92	58.06	394.218	LCLNNDTK	-	No	0	0.91	7.91	4.03	0	TRUE	2.73	3-4-0-0-0	0-1-0-0-0	HexNAc-Hex-(Hex-)Hex-HexNAc-HexNAc+HexNAc1	Hex-(HexNAc-Hex-)Hex-HexNAc-HexNAc+HexNAc1
					6956	6955	1242.54	1241.87	3	3722.59	58.18	888.458	GVFITNETGQPLIGK	-	No	0	0.73	3.02	133.96	-2	TRUE	8.2	5-7-0-0-0	1-1-0-0-0	HexNAc-(HexNAc-)Hex-(Hex-(Hex-Hex-)Hex-)Hex-HexNAc-HexNAc+Hex1HexNAc1	Hex-HexNAc-Hex-(HexNAc-(Hex-Hex-)Hex-)Hex-HexNAc-HexNAc+Hex1HexNAc1	Hex-HexNAc-Hex-(Hex-HexNAc-(Hex-)Hex-)Hex-HexNAc-HexNAc+Hex1HexNAc1	HexNAc-(Hex-Hex-)Hex-(Hex-HexNAc-Hex-)Hex-HexNAc-HexNAc+Hex1HexNAc1	HexNAc-(Hex-)Hex-(HexNAc-(Hex-Hex-)Hex-)Hex-HexNAc-HexNAc+Hex1HexNAc1	HexNAc-(Hex-)Hex-(Hex-HexNAc-(Hex-)Hex-)Hex-HexNAc-HexNAc+Hex1HexNAc1	Hex-Hex-(HexNAc-)Hex-(Hex-HexNAc-Hex-)Hex-HexNAc-HexNAc+Hex1HexNAc1	Hex-Hex-(HexNAc-)Hex-(HexNAc-(Hex-)Hex-)Hex-HexNAc-HexNAc+Hex1HexNAc1	Hex-Hex-(Hex-HexNAc-)Hex-(HexNAc-Hex-)Hex-HexNAc-HexNAc+Hex1HexNAc1	Hex-Hex-Hex-(HexNAc-)Hex-(HexNAc-Hex-)Hex-HexNAc-HexNAc+Hex1HexNAc1	Hex-HexNAc-(Hex-)Hex-(Hex-HexNAc-Hex-)Hex-HexNAc-HexNAc+Hex1HexNAc1	Hex-HexNAc-(Hex-)Hex-(HexNAc-(Hex-)Hex-)Hex-HexNAc-HexNAc+Hex1HexNAc1	Hex-HexNAc-(Hex-Hex-)Hex-(HexNAc-Hex-)Hex-HexNAc-HexNAc+Hex1HexNAc1	HexNAc-(HexNAc-)Hex-(Hex-Hex-Hex-Hex-)Hex-HexNAc-HexNAc+Hex1HexNAc1	HexNAc-(Hex-Hex-)Hex-(HexNAc-(Hex-)Hex-)Hex-HexNAc-HexNAc+Hex1HexNAc1	HexNAc-(Hex-HexNAc-)Hex-(Hex-Hex-Hex-)Hex-HexNAc-HexNAc+Hex1HexNAc1	HexNAc-(Hex-HexNAc-)Hex-(Hex-(Hex-)Hex-)Hex-HexNAc-HexNAc+Hex1HexNAc1	Hex-HexNAc-(HexNAc-)Hex-(Hex-Hex-Hex-)Hex-HexNAc-HexNAc+Hex1HexNAc1	Hex-HexNAc-(HexNAc-)Hex-(Hex-(Hex-)Hex-)Hex-HexNAc-HexNAc+Hex1HexNAc1	Hex-HexNAc-(Hex-HexNAc-)Hex-(Hex-Hex-)Hex-HexNAc-HexNAc+Hex1HexNAc1	HexNAc-(HexNAc-)Hex-(Hex-Hex-(Hex-)Hex-)Hex-HexNAc-HexNAc+Hex1HexNAc1
					6971	6966	1407.29	1406.62	3	4216.83	58.28	1378.54	ALYELAGGTNFSDTVQADPQTVTR	-	No	0	0.95	0.98	0.41	-2	TRUE	6.6	5-4-0-0-0	2-0-0-0-0	HexNAc-Hex-(Hex-Hex-)Hex-HexNAc-HexNAc+Hex2	HexNAc-(Hex-)Hex-(Hex-)Hex-HexNAc-HexNAc+Hex2	Hex-HexNAc-Hex-(Hex-)Hex-HexNAc-HexNAc+Hex2
					6984	6977	1353.27	1352.6	3	4054.78	58.37	1379.66	ALYELAGGTNFSDTVQADPQTVTR	-	No	0	0.95	0.9	0.47	0	TRUE	5.54	5-3-0-0-0	1-0-0-0-0	HexNAc-(HexNAc-)Hex-(Hex-)Hex-HexNAc-HexNAc+Hex1	HexNAc-Hex-(HexNAc-Hex-)Hex-HexNAc-HexNAc+Hex1
					6995	6988	1013.94	1013.43	4	4049.67	58.45	937.48	ESEQDVEDSQNHTGEPVGDDYKK	-	No	0	0.91	0.54	0.06	0	TRUE	1.51	4-3-1-0-0	1-0-0-0-0	HexNAc-Hex-(Hex-)Hex-HexNAc-(DeHex-)HexNAc+Hex1	Hex-(HexNAc-Hex-)Hex-HexNAc-(DeHex-)HexNAc+Hex1
					7006	6999	1188.2	1188.2	3	3561.57	58.52	1364.06	LANDTLIYFTSDQGAHVEEVSSK	-	No	1	0.7	86.53	0	-1	TRUE	2.06	2-3-1-0-0	0-0-1-0-0	Hex-(Hex-)Hex-HexNAc-HexNAc+DeHex1
					7008	6999	1139.79	1139.12	3	3414.34	58.53	625.322	EFGFAWPESLNCSK	-	No	0	0.85	2.43	29.97	0	TRUE	3.65	3-7-0-0-0	0-1-0-0-0	Hex-Hex-(HexNAc-)Hex-(Hex-Hex-)Hex-HexNAc-HexNAc+HexNAc1	Hex-HexNAc-(Hex-Hex-)Hex-(Hex-)Hex-HexNAc-HexNAc+HexNAc1	Hex-Hex-Hex-(HexNAc-)Hex-(Hex-)Hex-HexNAc-HexNAc+HexNAc1	Hex-Hex-(Hex-HexNAc-)Hex-(Hex-)Hex-HexNAc-HexNAc+HexNAc1
					7030	7021	1251.87	1251.54	3	3751.6	58.69	1114.57	SSCGKENTSDPSLVIAFGR	-	No	0	0.76	194.08	134.61	0	TRUE	3.97	3-6-1-0-0	0-0-1-0-0	HexNAc-Hex-Hex-(Hex-)Hex-(Hex-)Hex-HexNAc-HexNAc+DeHex1	Hex-HexNAc-Hex-Hex-Hex-(Hex-)Hex-HexNAc-HexNAc+DeHex1	HexNAc-Hex-Hex-Hex-(Hex-Hex-)Hex-HexNAc-HexNAc+DeHex1	Hex-Hex-(Hex-)Hex-(HexNAc-Hex-)Hex-HexNAc-HexNAc+DeHex1	Hex-Hex-Hex-Hex-(HexNAc-Hex-)Hex-HexNAc-HexNAc+DeHex1	Hex-Hex-Hex-(HexNAc-(Hex-)Hex-)Hex-HexNAc-HexNAc+DeHex1	Hex-Hex-Hex-(Hex-HexNAc-Hex-)Hex-HexNAc-HexNAc+DeHex1
					7033	7032	787.953	787.552	5	3932.73	58.71	572.554	ELNESENSVFQAVYGLQR	-	No	0	0.99	42.94	9.16	0	TRUE	3.85	6-3-1-0-0	0-0-1-0-0	HexNAc-(HexNAc-)Hex-(HexNAc-(HexNAc-)Hex-)Hex-HexNAc-HexNAc+DeHex1
					7037	7032	755.626	755.378	4	3017.48	58.74	501.923	IAPASNVSHTVVLRPLK	-	No	0	0.87	3.86	1.02	0	TRUE	0.81	2-5-0-0-0	0-1-0-0-0	Hex-Hex-(Hex-)Hex-HexNAc-HexNAc+HexNAc1	Hex-(Hex-Hex-)Hex-HexNAc-HexNAc+HexNAc1
					7044	7043	984.439	984.188	4	3932.72	58.78	647.808	TPLVQEVHQNFSAWCSQVVR	-	No	0	0.81	3.64	21.36	0	TRUE	1.49	3-4-0-1-0	0-0-0-1-0	Hex-HexNAc-Hex-(Hex-)Hex-HexNAc-HexNAc+NeuAc1	HexNAc-Hex-(Hex-Hex-)Hex-HexNAc-HexNAc+NeuAc1	HexNAc-(Hex-)Hex-(Hex-)Hex-HexNAc-HexNAc+NeuAc1
					7055	7054	695.338	694.938	5	3469.66	58.86	659.328	VENGSETGPLPPELQPLLEGEVK	-	No	0	0.95	4.01	0	0	TRUE	6.19	2-3-1-0-0	0-0-1-0-0	Hex-(Hex-)Hex-HexNAc-HexNAc+DeHex1
					7123	7120	918.755	918.415	3	2752.22	59.34	789.92	LVQLFPNDTSLK	-	No	0	0.63	26.59	18.28	0	TRUE	4.7	2-6-0-0-0	0-1-0-0-0	Hex-Hex-Hex-(Hex-)Hex-HexNAc-HexNAc+HexNAc1	Hex-Hex-(Hex-Hex-)Hex-HexNAc-HexNAc+HexNAc1
					7125	7120	1095.74	1094.99	4	4375.93	59.35	878.768	IIISPEENVTLTCTAENQLER	-	No	0	0.85	5.3	14.3	-2	TRUE	4.91	4-7-0-0-0	0-2-0-0-0	HexNAc-(Hex-Hex-)Hex-(HexNAc-Hex-)Hex-HexNAc-HexNAc+HexNAc2	HexNAc-(Hex-)Hex-(HexNAc-(Hex-)Hex-)Hex-HexNAc-HexNAc+HexNAc2	HexNAc-(Hex-)Hex-(Hex-HexNAc-Hex-)Hex-HexNAc-HexNAc+HexNAc2	Hex-HexNAc-(Hex-HexNAc-)Hex-(Hex-)Hex-HexNAc-HexNAc+HexNAc2	Hex-HexNAc-(HexNAc-)Hex-(Hex-Hex-)Hex-HexNAc-HexNAc+HexNAc2	Hex-HexNAc-Hex-HexNAc-Hex-(Hex-)Hex-HexNAc-HexNAc+HexNAc2	Hex-HexNAc-Hex-(HexNAc-(Hex-)Hex-)Hex-HexNAc-HexNAc+HexNAc2	Hex-HexNAc-Hex-(Hex-HexNAc-Hex-)Hex-HexNAc-HexNAc+HexNAc2	HexNAc-(Hex-HexNAc-)Hex-(Hex-Hex-)Hex-HexNAc-HexNAc+HexNAc2	HexNAc-(HexNAc-)Hex-(Hex-(Hex-)Hex-)Hex-HexNAc-HexNAc+HexNAc2	HexNAc-(HexNAc-)Hex-(Hex-Hex-Hex-)Hex-HexNAc-HexNAc+HexNAc2	Hex-(Hex-HexNAc-)Hex-(HexNAc-Hex-)Hex-HexNAc-HexNAc+HexNAc2	Hex-(HexNAc-)Hex-(HexNAc-(Hex-)Hex-)Hex-HexNAc-HexNAc+HexNAc2	Hex-(HexNAc-)Hex-(Hex-HexNAc-Hex-)Hex-HexNAc-HexNAc+HexNAc2
					7129	7120	1182.13	1181.46	3	3541.35	59.37	916.379	GSQWSDIEEFCNR	-	No	0	0.94	15.27	11.67	-2	TRUE	7.38	4-5-2-0-0	0-2-0-0-0	DeHex-HexNAc-Hex-(HexNAc-Hex-)Hex-HexNAc-(DeHex-)HexNAc+HexNAc2	DeHex-HexNAc-(HexNAc-)Hex-(Hex-)Hex-HexNAc-(DeHex-)HexNAc+HexNAc2
					7132	7131	995.448	995.448	4	3977.76	59.39	659.328	IIISPEENVTLTCTAENQLER	-	No	1	0.6	16.98	20.71	-2	TRUE	0.31	3-4-0-1-0	1-0-0-1-0	Hex-Hex-(Hex-)Hex-HexNAc-HexNAc+Hex1NeuAc1	Hex-(Hex-Hex-)Hex-HexNAc-HexNAc+Hex1NeuAc1
					7143	7142	1029.22	1028.72	4	4110.85	59.46	678.089	AHCVWLECPIPDAPVVTNVTVK	-	No	1	0.51	5.98	100	-3	TRUE	0.83	4-4-1-0-0	2-0-1-0-0	Hex-Hex-(Hex-)Hex-HexNAc-HexNAc+Hex2DeHex1	Hex-(Hex-Hex-)Hex-HexNAc-HexNAc+Hex2DeHex1
					7147	7142	1233.88	1233.2	3	3696.59	59.49	1075.53	ELGPLYTNITADIGTDPR	-	No	1	0.76	25.61	61.69	0	TRUE	4.82	4-4-0-1-0	0-0-0-1-0	HexNAc-Hex-(Hex-(HexNAc-)Hex-)Hex-HexNAc-HexNAc+NeuAc1	HexNAc-(HexNAc-)Hex-(Hex-Hex-)Hex-HexNAc-HexNAc+NeuAc1	Hex-HexNAc-Hex-(HexNAc-Hex-)Hex-HexNAc-HexNAc+NeuAc1	HexNAc-Hex-HexNAc-Hex-(Hex-)Hex-HexNAc-HexNAc+NeuAc1	Hex-HexNAc-(HexNAc-)Hex-(Hex-)Hex-HexNAc-HexNAc+NeuAc1	HexNAc-(Hex-)Hex-(HexNAc-Hex-)Hex-HexNAc-HexNAc+NeuAc1
					7149	7142	1305.11	1304.1	2	2606.19	59.51	654.638	AAENFTLLVK	-	No	0	0.95	0.12	0	-3	TRUE	4.59	5-3-0-0-0	3-0-0-0-0	Hex-(Hex-)Hex-HexNAc-HexNAc+Hex3
					7158	7153	1327.6	1326.6	3	3976.77	59.57	961.773	GTEVNTTVIGENDPIDEVQGFLFGK	-	No	0	0.95	3.78	0	-2	TRUE	5.83	4-3-0-0-0	2-0-0-0-0	Hex-(Hex-)Hex-HexNAc-HexNAc+Hex2
					7162	7153	823.78	823.184	5	4110.88	59.59	542.497	AHCVWLECPIPDAPVVTNVTVK	-	No	0	0.81	8.7	76.12	0	TRUE	8.31	4-4-1-0-0	1-0-0-0-0	Hex-Hex-(HexNAc-Hex-)Hex-HexNAc-(DeHex-)HexNAc+Hex1
					7173	7164	935.408	935.068	3	2802.18	59.67	895.972	VVTQNSSSGNVTHEK	-	No	0	0.81	17.52	0.45	0	TRUE	5.58	2-5-0-0-0	0-1-0-0-0	Hex-Hex-(Hex-)Hex-HexNAc-HexNAc+HexNAc1	Hex-(Hex-Hex-)Hex-HexNAc-HexNAc+HexNAc1
					7180	7175	1371.96	1371.29	3	4110.86	59.72	1355.17	AHCVWLECPIPDAPVVTNVTVK	-	No	1	0.51	15.02	45.7	0	TRUE	2.02	4-4-1-0-0	0-0-1-0-0	Hex-Hex-(HexNAc-(HexNAc-)Hex-)Hex-HexNAc-HexNAc+DeHex1	Hex-(HexNAc-)Hex-(HexNAc-Hex-)Hex-HexNAc-HexNAc+DeHex1
					7187	7186	1236.5	1235.84	3	3704.49	59.76	822.356	LGDCISEDSYPDGNITWYR	-	No	0	0.96	1.9	2.45	0	TRUE	6.19	4-3-1-0-0	1-0-0-0-0	HexNAc-Hex-(Hex-)Hex-HexNAc-(DeHex-)HexNAc+Hex1	Hex-(HexNAc-Hex-)Hex-HexNAc-(DeHex-)HexNAc+Hex1
					7193	7186	891.995	891.794	5	4453.94	59.8	682.824	LANDTLIYFTSDQGAHVEEVSSK	-	No	0	0.96	11	15.17	-2	TRUE	8.55	4-6-1-0-0	0-2-0-0-0	HexNAc-Hex-(HexNAc-(Hex-)Hex-)Hex-HexNAc-(DeHex-)HexNAc+HexNAc2	HexNAc-Hex-(Hex-HexNAc-Hex-)Hex-HexNAc-(DeHex-)HexNAc+HexNAc2	Hex-HexNAc-Hex-(HexNAc-Hex-)Hex-HexNAc-(DeHex-)HexNAc+HexNAc2	HexNAc-(HexNAc-)Hex-(Hex-Hex-)Hex-HexNAc-(DeHex-)HexNAc+HexNAc2	HexNAc-(Hex-HexNAc-)Hex-(Hex-)Hex-HexNAc-(DeHex-)HexNAc+HexNAc2	Hex-HexNAc-(HexNAc-)Hex-(Hex-)Hex-HexNAc-(DeHex-)HexNAc+HexNAc2	HexNAc-(Hex-)Hex-(HexNAc-Hex-)Hex-HexNAc-(DeHex-)HexNAc+HexNAc2
					7213	7208	1245.84	1245.5	3	3733.48	59.95	1043.44	GPNCSEPECPGNCHLR	-	No	0	0.91	5.02	5.28	0	TRUE	6.93	6-3-1-0-0	1-0-0-0-0	DeHex-HexNAc-(HexNAc-)Hex-(HexNAc-Hex-)Hex-HexNAc-HexNAc+Hex1	DeHex-HexNAc-Hex-(HexNAc-(HexNAc-)Hex-)Hex-HexNAc-HexNAc+Hex1
					7215	7208	1378.58	1378.24	3	4131.69	59.96	910.097	VEHNQSYSQAGITETEWTSGSSK	-	No	0	0.54	7.92	129.71	0	TRUE	10.05	4-4-1-0-0	0-1-0-0-0	HexNAc-Hex-(HexNAc-Hex-)Hex-HexNAc-(DeHex-)HexNAc+HexNAc1	HexNAc-(HexNAc-)Hex-(Hex-)Hex-HexNAc-(DeHex-)HexNAc+HexNAc1
					7222	7219	1067.46	1067.21	4	4264.83	60.02	730.844	ILLTCSLNDSATEVTGHR	-	No	0	0.92	1.62	7.4	-3	TRUE	5.5	5-6-0-1-0	2-1-0-0-0	NeuAc-Hex-HexNAc-Hex-(Hex-Hex-)Hex-HexNAc-HexNAc+Hex2HexNAc1
					7233	7230	1024.18	1023.68	4	4090.67	60.11	606.524	VEDEGNYTCLFVTFPQGSR	-	No	0	0.75	10.01	42.04	0	TRUE	4.54	3-6-0-1-0	0-0-0-1-0	Hex-HexNAc-Hex-(Hex-Hex-Hex-)Hex-HexNAc-HexNAc+NeuAc1	HexNAc-(Hex-)Hex-(Hex-Hex-Hex-)Hex-HexNAc-HexNAc+NeuAc1	HexNAc-(Hex-)Hex-(Hex-(Hex-)Hex-)Hex-HexNAc-HexNAc+NeuAc1	Hex-Hex-Hex-Hex-(HexNAc-Hex-)Hex-HexNAc-HexNAc+NeuAc1	Hex-HexNAc-(Hex-)Hex-(Hex-Hex-)Hex-HexNAc-HexNAc+NeuAc1	Hex-Hex-Hex-(Hex-HexNAc-Hex-)Hex-HexNAc-HexNAc+NeuAc1	HexNAc-(Hex-Hex-)Hex-(Hex-Hex-)Hex-HexNAc-HexNAc+NeuAc1	Hex-(Hex-)Hex-(Hex-HexNAc-Hex-)Hex-HexNAc-HexNAc+NeuAc1	Hex-(Hex-)Hex-(HexNAc-(Hex-)Hex-)Hex-HexNAc-HexNAc+NeuAc1	Hex-(Hex-Hex-)Hex-(HexNAc-Hex-)Hex-HexNAc-HexNAc+NeuAc1	Hex-HexNAc-Hex-(Hex-(Hex-)Hex-)Hex-HexNAc-HexNAc+NeuAc1	Hex-Hex-Hex-(HexNAc-(Hex-)Hex-)Hex-HexNAc-HexNAc+NeuAc1	Hex-Hex-(Hex-)Hex-(HexNAc-Hex-)Hex-HexNAc-HexNAc+NeuAc1
					7235	7230	1066.13	1065.46	3	3193.36	60.12	977.462	SDLNPANGSYPFQALR	-	No	1	0.52	28.77	2.64	0	TRUE	5.58	4-3-1-0-0	1-0-0-0-0	DeHex-HexNAc-Hex-(Hex-)Hex-HexNAc-HexNAc+Hex1
					7255	7252	1117.49	1116.83	3	3347.46	60.26	581.507	KQNNGAFNETLFR	-	No	0	0.96	2.67	6.16	-3	TRUE	6.05	5-4-1-0-0	2-1-0-0-0	HexNAc-Hex-(Hex-)Hex-HexNAc-(DeHex-)HexNAc+Hex2HexNAc1	Hex-(HexNAc-Hex-)Hex-HexNAc-(DeHex-)HexNAc+Hex2HexNAc1
					7257	7252	719.326	719.074	4	2872.27	60.27	510.494	EGSGYFFLNTSTADVVK	-	No	0	0.86	14.75	0	0	TRUE	3.57	2-3-1-0-0	0-0-1-0-0	Hex-(Hex-)Hex-HexNAc-HexNAc+DeHex1
					7268	7263	984.933	984.434	4	3933.71	60.35	557.786	VEAAQNLTLPGSLR	-	No	0	0.7	5.32	37.18	0	TRUE	0.99	6-5-1-1-0	1-0-0-0-0	NeuAc-Hex-HexNAc-(HexNAc-)Hex-(Hex-(HexNAc-)Hex-)Hex-HexNAc-(DeHex-)HexNAc+Hex1	NeuAc-Hex-HexNAc-(Hex-)Hex-(HexNAc-(HexNAc-)Hex-)Hex-HexNAc-(DeHex-)HexNAc+Hex1
					7316	7307	1103.51	1103.17	3	3306.48	60.67	751.646	LFNTSVEVLPFDNPQSDK	-	No	0	0.9	6.11	7.54	0	TRUE	6.28	3-4-0-0-0	1-0-0-0-0	Hex-Hex-(Hex-)Hex-HexNAc-HexNAc+Hex1	Hex-(Hex-Hex-)Hex-HexNAc-HexNAc+Hex1
					7371	7362	748.608	748.354	4	2989.39	61.06	448.49	SGVINLTEEVLWVK	-	No	1	0.88	42.54	68.05	0	TRUE	0.9	3-4-1-0-0	0-0-1-0-0	Hex-Hex-(HexNAc-Hex-)Hex-HexNAc-HexNAc+DeHex1
					7380	7373	1111.7	1111.45	4	4441.78	61.12	629.036	DLYEYSWVQGPLHSNETDR	-	No	0	0.94	4	46.88	-2	TRUE	9.56	5-6-1-0-0	2-0-0-0-0	Hex-Hex-Hex-Hex-(HexNAc-Hex-)Hex-HexNAc-(DeHex-)HexNAc+Hex2	HexNAc-Hex-Hex-Hex-(Hex-Hex-)Hex-HexNAc-(DeHex-)HexNAc+Hex2
					7387	7384	1125.49	1124.99	4	4495.93	61.18	1099.74	NETTYENGQVTLVCDAEGEPIPEITWK	-	No	0	0.62	40	5.55	-1	TRUE	7.49	3-4-1-0-0	0-1-0-0-0	HexNAc-Hex-(Hex-)Hex-HexNAc-(DeHex-)HexNAc+HexNAc1	Hex-(HexNAc-Hex-)Hex-HexNAc-(DeHex-)HexNAc+HexNAc1
					7391	7384	1419.27	1418.59	3	4252.75	61.21	1365.28	VEHNQSYSQAGITETEWTSGSSK	-	No	1	0.81	137.54	15.8	-2	TRUE	3.1	3-6-1-0-0	1-1-0-0-0	Hex-Hex-(Hex-Hex-)Hex-HexNAc-(DeHex-)HexNAc+Hex1HexNAc1	Hex-Hex-Hex-(Hex-)Hex-HexNAc-(DeHex-)HexNAc+Hex1HexNAc1
					7404	7395	1158.47	1158.14	3	3471.41	61.3	990.209	SYSTTYEERNITGTR	-	No	0	0.77	17.81	11.29	0	TRUE	9.35	3-4-1-1-0	0-0-1-0-0	NeuAc-Hex-HexNAc-Hex-(Hex-)Hex-HexNAc-HexNAc+DeHex1
					7420	7417	890.415	890.166	4	3556.63	61.41	470.5	IPLVNISLLPK	-	No	0	0.93	0.6	24.93	0	TRUE	6.32	4-5-1-2-0	0-0-0-1-0	Hex-(HexNAc-)Hex-(NeuAc-Hex-HexNAc-Hex-)Hex-HexNAc-(DeHex-)HexNAc+NeuAc1	NeuAc-Hex-HexNAc-(HexNAc-)Hex-(Hex-Hex-)Hex-HexNAc-(DeHex-)HexNAc+NeuAc1	NeuAc-Hex-HexNAc-(Hex-)Hex-(HexNAc-Hex-)Hex-HexNAc-(DeHex-)HexNAc+NeuAc1
					7440	7439	1428.26	1427.59	3	4279.75	61.55	1409.87	DYNSSREDSLQDAWDYVQAQVK	-	No	0	0.96	7.03	2.36	-2	TRUE	8.44	5-4-0-0-0	1-1-0-0-0	HexNAc-(HexNAc-)Hex-(Hex-)Hex-HexNAc-HexNAc+Hex1HexNAc1	HexNAc-Hex-(HexNAc-Hex-)Hex-HexNAc-HexNAc+Hex1HexNAc1
					7446	7439	823.893	823.142	4	3288.54	61.59	813.756	QVALQTFGNQTTIIPAGGAGYK	-	No	0	0.89	13.91	0	0	TRUE	3.86	2-4-0-0-0	0-1-0-0-0	Hex-(Hex-)Hex-HexNAc-HexNAc+HexNAc1
					7462	7461	1383.23	1382.9	3	4145.69	61.71	1020.14	EGSGYFFLNTSTADVVK	-	No	0	0.72	7.9	26.28	-2	TRUE	3.06	5-8-0-0-0	0-2-0-0-0	Hex-HexNAc-Hex-HexNAc-Hex-(Hex-HexNAc-Hex-)Hex-HexNAc-HexNAc+HexNAc2	Hex-HexNAc-Hex-HexNAc-(Hex-HexNAc-)Hex-(Hex-)Hex-HexNAc-HexNAc+HexNAc2	Hex-HexNAc-(Hex-HexNAc-)Hex-(HexNAc-(Hex-)Hex-)Hex-HexNAc-HexNAc+HexNAc2	Hex-HexNAc-(Hex-HexNAc-)Hex-(Hex-HexNAc-Hex-)Hex-HexNAc-HexNAc+HexNAc2	Hex-HexNAc-Hex-HexNAc-(HexNAc-)Hex-(Hex-Hex-)Hex-HexNAc-HexNAc+HexNAc2	HexNAc-Hex-HexNAc-(HexNAc-)Hex-(Hex-(Hex-)Hex-)Hex-HexNAc-HexNAc+HexNAc2	HexNAc-Hex-HexNAc-(HexNAc-)Hex-(Hex-Hex-Hex-)Hex-HexNAc-HexNAc+HexNAc2	Hex-HexNAc-(Hex-HexNAc-)Hex-(Hex-(HexNAc-)Hex-)Hex-HexNAc-HexNAc+HexNAc2	Hex-HexNAc-(HexNAc-)Hex-(Hex-Hex-(HexNAc-)Hex-)Hex-HexNAc-HexNAc+HexNAc2	Hex-HexNAc-(HexNAc-)Hex-(Hex-(Hex-HexNAc-)Hex-)Hex-HexNAc-HexNAc+HexNAc2	Hex-Hex-Hex-(HexNAc-)Hex-(HexNAc-(HexNAc-)Hex-)Hex-HexNAc-HexNAc+HexNAc2	Hex-Hex-(Hex-HexNAc-)Hex-(HexNAc-(HexNAc-)Hex-)Hex-HexNAc-HexNAc+HexNAc2	Hex-Hex-(HexNAc-)Hex-(Hex-HexNAc-(HexNAc-)Hex-)Hex-HexNAc-HexNAc+HexNAc2	HexNAc-Hex-HexNAc-(Hex-HexNAc-)Hex-(Hex-Hex-)Hex-HexNAc-HexNAc+HexNAc2	Hex-HexNAc-Hex-HexNAc-(Hex-)Hex-(HexNAc-Hex-)Hex-HexNAc-HexNAc+HexNAc2	Hex-Hex-(HexNAc-)Hex-(HexNAc-(Hex-HexNAc-)Hex-)Hex-HexNAc-HexNAc+HexNAc2	HexNAc-Hex-HexNAc-Hex-(Hex-HexNAc-(Hex-)Hex-)Hex-HexNAc-HexNAc+HexNAc2	Hex-HexNAc-Hex-HexNAc-Hex-(HexNAc-(Hex-)Hex-)Hex-HexNAc-HexNAc+HexNAc2	Hex-HexNAc-(HexNAc-)Hex-(HexNAc-(Hex-Hex-)Hex-)Hex-HexNAc-HexNAc+HexNAc2	Hex-HexNAc-(HexNAc-)Hex-(Hex-HexNAc-(Hex-)Hex-)Hex-HexNAc-HexNAc+HexNAc2	HexNAc-Hex-HexNAc-Hex-(HexNAc-(Hex-Hex-)Hex-)Hex-HexNAc-HexNAc+HexNAc2	Hex-HexNAc-(Hex-)Hex-(Hex-HexNAc-(HexNAc-)Hex-)Hex-HexNAc-HexNAc+HexNAc2	Hex-HexNAc-(Hex-Hex-)Hex-(HexNAc-(HexNAc-)Hex-)Hex-HexNAc-HexNAc+HexNAc2	HexNAc-Hex-HexNAc-(Hex-)Hex-(Hex-HexNAc-Hex-)Hex-HexNAc-HexNAc+HexNAc2	HexNAc-Hex-HexNAc-(Hex-)Hex-(HexNAc-(Hex-)Hex-)Hex-HexNAc-HexNAc+HexNAc2
					7466	7461	1106.25	1105.99	4	4419.93	61.74	690.335	ALYELAGGTNFSDTVQADPQTVTR	-	No	0	0.7	10.49	36.64	-3	TRUE	1.1	6-4-0-0-0	3-0-0-0-0	Hex-Hex-(HexNAc-Hex-)Hex-HexNAc-HexNAc+Hex3
					7481	7472	1232.52	1232.28	4	4925.11	61.86	972.43	AFSNSSYVLNPTTGELVFDPLSASDTGEYSCEAR	-	No	0	0.73	8.77	1.86	0	TRUE	0.69	3-3-1-0-0	0-0-1-0-0	HexNAc-Hex-(Hex-)Hex-HexNAc-HexNAc+DeHex1	Hex-(HexNAc-Hex-)Hex-HexNAc-HexNAc+DeHex1
					7497	7494	1319.55	1319.55	3	3955.64	61.98	838.402	DLYEYSWVQGPLHSNETDR	-	No	0	0.97	1.67	0	-3	TRUE	6.23	5-3-1-0-0	3-0-0-0-0	Hex-(Hex-)Hex-HexNAc-(DeHex-)HexNAc+Hex3
					7506	7505	1305.56	1304.89	3	3911.66	62.05	1020.14	ANIQFGDNGTTISAVSNK	-	No	1	0.66	28.35	42.02	-3	TRUE	4.43	4-6-0-1-0	1-2-0-0-0	NeuAc-Hex-HexNAc-Hex-(Hex-)Hex-HexNAc-HexNAc+Hex1HexNAc2
					7510	7505	855.063	854.727	3	2561.16	62.08	570.614	YDLPASINFILNK	-	No	0	0.97	21.62	0	0	TRUE	9.06	2-4-0-0-0	0-1-0-0-0	Hex-(Hex-)Hex-HexNAc-HexNAc+HexNAc1
					7523	7516	1324.6	1323.27	3	3966.78	62.18	1376.67	GCSSSTSVLLTLDNNVVNGSSPAIR	-	No	0	0.85	7.99	1.66	0	TRUE	3.82	3-5-0-0-0	1-0-0-0-0	Hex-Hex-Hex-(Hex-)Hex-HexNAc-HexNAc+Hex1	Hex-Hex-(Hex-Hex-)Hex-HexNAc-HexNAc+Hex1
					7525	7516	1022.48	1022.14	3	3063.4	62.19	787.428	DLVVQQLVNVSR	-	No	0	0.79	29.13	0.39	-2	TRUE	4.78	3-4-1-1-0	1-0-0-1-0	Hex-Hex-(Hex-)Hex-HexNAc-(DeHex-)HexNAc+Hex1NeuAc1	Hex-(Hex-Hex-)Hex-HexNAc-(DeHex-)HexNAc+Hex1NeuAc1
					7539	7538	941.101	940.764	3	2819.27	62.28	526.949	FNVSLDSVPELR	-	No	0	0.94	2.9	11.86	0	TRUE	5.98	4-3-1-0-0	0-0-1-0-0	HexNAc-(HexNAc-)Hex-(Hex-)Hex-HexNAc-HexNAc+DeHex1	HexNAc-Hex-(HexNAc-Hex-)Hex-HexNAc-HexNAc+DeHex1
					7554	7549	1202.86	1202.19	3	3603.56	62.39	1215.58	SLCNSIISLNTTISCSEAQK	-	No	0	0.93	0.47	0	-3	TRUE	2.64	2-6-0-0-0	0-3-0-0-0	Hex-(Hex-)Hex-HexNAc-HexNAc+HexNAc3
					7563	7560	1331.24	1330.57	3	3988.7	62.45	1030.03	GNLTYGYVTILNGSDIR	-	No	0	0.95	5.53	9.79	-2	TRUE	9.3	5-6-1-0-0	1-1-0-0-0	Hex-HexNAc-(HexNAc-)Hex-(Hex-Hex-)Hex-HexNAc-(DeHex-)HexNAc+Hex1HexNAc1	HexNAc-(HexNAc-)Hex-(Hex-Hex-Hex-)Hex-HexNAc-(DeHex-)HexNAc+Hex1HexNAc1	Hex-HexNAc-(Hex-)Hex-(HexNAc-Hex-)Hex-HexNAc-(DeHex-)HexNAc+Hex1HexNAc1	Hex-Hex-(HexNAc-)Hex-(HexNAc-Hex-)Hex-HexNAc-(DeHex-)HexNAc+Hex1HexNAc1	HexNAc-(Hex-)Hex-(HexNAc-(Hex-)Hex-)Hex-HexNAc-(DeHex-)HexNAc+Hex1HexNAc1	HexNAc-(Hex-)Hex-(Hex-HexNAc-Hex-)Hex-HexNAc-(DeHex-)HexNAc+Hex1HexNAc1	Hex-HexNAc-Hex-(HexNAc-(Hex-)Hex-)Hex-HexNAc-(DeHex-)HexNAc+Hex1HexNAc1	Hex-HexNAc-Hex-(Hex-HexNAc-Hex-)Hex-HexNAc-(DeHex-)HexNAc+Hex1HexNAc1	HexNAc-(HexNAc-)Hex-(Hex-(Hex-)Hex-)Hex-HexNAc-(DeHex-)HexNAc+Hex1HexNAc1	Hex-HexNAc-(Hex-HexNAc-)Hex-(Hex-)Hex-HexNAc-(DeHex-)HexNAc+Hex1HexNAc1
					7572	7571	1549.62	1549.11	2	3096.21	62.52	798.718	YHGFLNTSYHR	-	No	0	0.94	4.48	7.94	0	TRUE	8.04	2-8-0-0-0	0-1-0-0-0	Hex-Hex-Hex-Hex-Hex-(Hex-)Hex-HexNAc-HexNAc+HexNAc1	Hex-Hex-Hex-Hex-(Hex-Hex-)Hex-HexNAc-HexNAc+HexNAc1	Hex-Hex-Hex-(Hex-Hex-Hex-)Hex-HexNAc-HexNAc+HexNAc1
					7574	7571	1117.15	1116.49	3	3346.44	62.53	838.402	DLYEYSWVQGPLHSNETDR	-	No	0	0.85	20.14	0	0	TRUE	4.01	2-3-1-0-0	0-0-1-0-0	Hex-(Hex-)Hex-HexNAc-HexNAc+DeHex1
					7587	7582	1276.9	1276.57	3	3826.68	62.62	787.428	DLVVQQLVNVSR	-	No	0	0.89	6.86	20.06	-3	TRUE	5.04	5-8-1-0-0	0-3-0-0-0	Hex-HexNAc-(HexNAc-)Hex-(DeHex-HexNAc-(Hex-)Hex-)Hex-HexNAc-HexNAc+HexNAc3	DeHex-HexNAc-(Hex-)Hex-(HexNAc-(Hex-HexNAc-)Hex-)Hex-HexNAc-HexNAc+HexNAc3	DeHex-HexNAc-(Hex-)Hex-(Hex-HexNAc-(HexNAc-)Hex-)Hex-HexNAc-HexNAc+HexNAc3	DeHex-HexNAc-(Hex-Hex-)Hex-(HexNAc-(HexNAc-)Hex-)Hex-HexNAc-HexNAc+HexNAc3	DeHex-HexNAc-(HexNAc-)Hex-(HexNAc-(Hex-Hex-)Hex-)Hex-HexNAc-HexNAc+HexNAc3	DeHex-HexNAc-(HexNAc-)Hex-(Hex-HexNAc-(Hex-)Hex-)Hex-HexNAc-HexNAc+HexNAc3	DeHex-HexNAc-(Hex-HexNAc-)Hex-(Hex-HexNAc-Hex-)Hex-HexNAc-HexNAc+HexNAc3	DeHex-HexNAc-(Hex-HexNAc-)Hex-(HexNAc-(Hex-)Hex-)Hex-HexNAc-HexNAc+HexNAc3	Hex-HexNAc-(Hex-HexNAc-)Hex-(DeHex-HexNAc-Hex-)Hex-HexNAc-HexNAc+HexNAc3
					7602	7593	1314.56	1314.56	3	3940.66	62.73	1289.67	TEAGAFEYVPDPTFENFTGGVK	-	No	0	0.78	109.19	34.5	0	TRUE	2.17	3-5-1-0-0	0-0-1-0-0	Hex-Hex-(Hex-HexNAc-Hex-)Hex-HexNAc-HexNAc+DeHex1	Hex-Hex-(HexNAc-(Hex-)Hex-)Hex-HexNAc-HexNAc+DeHex1	Hex-(Hex-)Hex-(HexNAc-Hex-)Hex-HexNAc-HexNAc+DeHex1
					7609	7604	1074.44	1073.78	3	3218.33	62.79	860.84	LWNSTFLEEYSK	-	No	1	0.96	65.57	35.07	-2	TRUE	5.23	2-8-0-0-0	0-2-0-0-0	Hex-Hex-Hex-Hex-(Hex-)Hex-HexNAc-HexNAc+HexNAc2	Hex-Hex-Hex-(Hex-Hex-)Hex-HexNAc-HexNAc+HexNAc2	Hex-Hex-(Hex-Hex-Hex-)Hex-HexNAc-HexNAc+HexNAc2
					7622	7615	1258.56	1257.89	3	3770.64	62.88	717.357	ELGPLYTNITADIGTDPR	-	No	0	0.88	1.37	1.36	-3	TRUE	1.68	5-5-0-0-0	2-1-0-0-0	HexNAc-(Hex-)Hex-(Hex-)Hex-HexNAc-HexNAc+Hex2HexNAc1	Hex-HexNAc-Hex-(Hex-)Hex-HexNAc-HexNAc+Hex2HexNAc1	HexNAc-Hex-(Hex-Hex-)Hex-HexNAc-HexNAc+Hex2HexNAc1
					7631	7626	917.086	916.755	3	2747.24	62.94	525.288	DLVVQQLVNVSR	-	No	0	0.92	1.4	1.08	0	TRUE	4	2-6-0-0-0	0-1-0-0-0	Hex-Hex-Hex-(Hex-)Hex-HexNAc-HexNAc+HexNAc1	Hex-Hex-(Hex-Hex-)Hex-HexNAc-HexNAc+HexNAc1
					7633	7626	1339.56	1338.56	3	4012.66	62.96	838.402	DLYEYSWVQGPLHSNETDR	-	No	0	0.96	1.78	1.07	-3	TRUE	6.51	6-3-0-0-0	3-0-0-0-0	HexNAc-Hex-(Hex-)Hex-HexNAc-HexNAc+Hex3	Hex-(HexNAc-Hex-)Hex-HexNAc-HexNAc+Hex3
					7642	7637	902.399	901.901	4	3603.58	63.02	810.72	SLCNSIISLNTTISCSEAQK	-	No	0	0.8	22.41	3.12	0	TRUE	6.98	2-6-0-0-0	0-1-0-0-0	Hex-Hex-Hex-(Hex-)Hex-HexNAc-HexNAc+HexNAc1	Hex-Hex-(Hex-Hex-)Hex-HexNAc-HexNAc+HexNAc1
					7644	7637	1266.84	1266.84	3	3797.49	63.03	848.023	DAGVGFPEYQEEDNSTYNFR	-	No	0	0.96	0.58	2.89	0	TRUE	6.69	4-4-0-0-0	0-1-0-0-0	HexNAc-(HexNAc-)Hex-(Hex-)Hex-HexNAc-HexNAc+HexNAc1	HexNAc-Hex-(HexNAc-Hex-)Hex-HexNAc-HexNAc+HexNAc1
					7666	7659	1101.8	1101.8	3	3302.37	63.2	634.078	NMSFVNDLTVTQDGR	-	No	0	0.9	3.99	9.3	-3	TRUE	3.99	4-4-1-0-0	1-1-1-0-0	HexNAc-Hex-(Hex-)Hex-HexNAc-HexNAc+Hex1HexNAc1DeHex1	Hex-(HexNAc-Hex-)Hex-HexNAc-HexNAc+Hex1HexNAc1DeHex1
					7675	7670	921.441	921.105	3	2760.29	63.27	862.45	SINVTGQGFSLIQR	-	No	0	0.89	9.79	1.66	0	TRUE	6.28	3-3-1-0-0	0-0-1-0-0	HexNAc-Hex-(Hex-)Hex-HexNAc-HexNAc+DeHex1	Hex-(HexNAc-Hex-)Hex-HexNAc-HexNAc+DeHex1
					7679	7670	890.419	890.419	4	3557.65	63.3	470.5	IPLVNISLLPK	-	No	0	0.84	13.29	59.01	-2	TRUE	4.74	4-5-3-1-0	0-0-1-1-0	HexNAc-(DeHex-HexNAc-)Hex-(Hex-Hex-Hex-)Hex-HexNAc-(DeHex-)HexNAc+DeHex1NeuAc1	Hex-(DeHex-HexNAc-)Hex-(Hex-HexNAc-Hex-)Hex-HexNAc-(DeHex-)HexNAc+DeHex1NeuAc1	Hex-(DeHex-HexNAc-)Hex-(HexNAc-(Hex-)Hex-)Hex-HexNAc-(DeHex-)HexNAc+DeHex1NeuAc1	HexNAc-(DeHex-HexNAc-)Hex-(Hex-(Hex-)Hex-)Hex-HexNAc-(DeHex-)HexNAc+DeHex1NeuAc1	Hex-HexNAc-Hex-(Hex-(DeHex-)HexNAc-Hex-)Hex-HexNAc-(DeHex-)HexNAc+DeHex1NeuAc1	Hex-(DeHex-)HexNAc-Hex-HexNAc-Hex-(Hex-)Hex-HexNAc-(DeHex-)HexNAc+DeHex1NeuAc1	Hex-(HexNAc-)Hex-(Hex-(DeHex-)HexNAc-Hex-)Hex-HexNAc-(DeHex-)HexNAc+DeHex1NeuAc1	Hex-HexNAc-(Hex-(DeHex-)HexNAc-)Hex-(Hex-)Hex-HexNAc-(DeHex-)HexNAc+DeHex1NeuAc1	HexNAc-(Hex-)Hex-(Hex-(DeHex-)HexNAc-Hex-)Hex-HexNAc-(DeHex-)HexNAc+DeHex1NeuAc1	Hex-Hex-(DeHex-HexNAc-)Hex-(HexNAc-Hex-)Hex-HexNAc-(DeHex-)HexNAc+DeHex1NeuAc1
					7695	7692	907.894	907.39	4	3625.53	63.41	542.269	VWNSTFIEDYRDFDR	-	No	0	0.97	0.75	0.93	-2	TRUE	7.81	5-4-0-0-0	2-0-0-0-0	HexNAc-Hex-(Hex-Hex-)Hex-HexNAc-HexNAc+Hex2	Hex-HexNAc-Hex-(Hex-)Hex-HexNAc-HexNAc+Hex2	HexNAc-(Hex-)Hex-(Hex-)Hex-HexNAc-HexNAc+Hex2
					7719	7714	1149.15	1148.47	3	3442.4	63.59	516.009	LSDTANYTCVAK	-	No	0	0.67	3.26	109.92	-3	TRUE	2.98	5-4-1-1-0	2-0-0-1-0	Hex-Hex-(HexNAc-Hex-)Hex-HexNAc-(DeHex-)HexNAc+Hex2NeuAc1
					7752	7747	991.765	991.096	3	2970.27	63.83	897.681	KHPDASVNFSEFSK	-	No	0	0.94	9.66	1.19	0	TRUE	7.73	2-6-0-0-0	0-1-0-0-0	Hex-Hex-Hex-(Hex-)Hex-HexNAc-HexNAc+HexNAc1	Hex-Hex-(Hex-Hex-)Hex-HexNAc-HexNAc+HexNAc1
					7759	7758	841.059	840.722	3	2519.14	63.89	611.994	IIFANVSVR	-	No	0	0.84	10.78	0.99	-2	TRUE	5.62	5-3-0-0-0	2-0-0-0-0	HexNAc-Hex-(Hex-)Hex-HexNAc-HexNAc+Hex2	Hex-(HexNAc-Hex-)Hex-HexNAc-HexNAc+Hex2
					7763	7758	1139.48	1138.81	3	3413.42	63.92	925.445	YFFNVSDEAALLEK	-	No	0	0.85	18.45	53.48	-2	TRUE	8.87	4-5-1-0-0	0-2-0-0-0	HexNAc-Hex-(HexNAc-Hex-)Hex-HexNAc-(DeHex-)HexNAc+HexNAc2	HexNAc-(HexNAc-)Hex-(Hex-)Hex-HexNAc-(DeHex-)HexNAc+HexNAc2
					7772	7769	1202.53	1202.19	3	3603.56	63.99	810.72	SLCNSIISLNTTISCSEAQK	-	No	0	0.9	0.25	0.33	0	TRUE	2.37	2-6-0-0-0	0-1-0-0-0	Hex-Hex-Hex-(Hex-)Hex-HexNAc-HexNAc+HexNAc1	Hex-Hex-(Hex-Hex-)Hex-HexNAc-HexNAc+HexNAc1
					7785	7780	1116.5	1116.5	4	4461.97	64.08	917.487	GCSSSTSVLLTLDNNVVNGSSPAIR	-	No	0	0.69	1.81	101.93	0	TRUE	1.86	4-5-2-0-0	1-0-0-0-0	DeHex-HexNAc-(Hex-)Hex-(Hex-Hex-)Hex-HexNAc-(DeHex-)HexNAc+Hex1	DeHex-HexNAc-Hex-(Hex-(Hex-)Hex-)Hex-HexNAc-(DeHex-)HexNAc+Hex1	DeHex-HexNAc-Hex-(Hex-Hex-Hex-)Hex-HexNAc-(DeHex-)HexNAc+Hex1
					7796	7791	1188.53	1188.2	3	3561.58	64.16	910.097	LANDTLIYFTSDQGAHVEEVSSK	-	No	0	0.73	28.99	0	0	TRUE	0.48	2-3-1-0-0	0-0-1-0-0	Hex-(Hex-)Hex-HexNAc-HexNAc+DeHex1
					7818	7813	1601.67	1600.67	2	3199.33	64.33	770.229	ANNSWFQSILR	-	No	1	0.78	44.17	29.75	0	TRUE	6.64	2-9-0-0-0	0-1-0-0-0	Hex-Hex-Hex-Hex-Hex-Hex-(Hex-)Hex-HexNAc-HexNAc+HexNAc1	Hex-Hex-Hex-Hex-Hex-(Hex-Hex-)Hex-HexNAc-HexNAc+HexNAc1	Hex-Hex-Hex-Hex-(Hex-Hex-Hex-)Hex-HexNAc-HexNAc+HexNAc1	Hex-Hex-Hex-(Hex-Hex-Hex-Hex-)Hex-HexNAc-HexNAc+HexNAc1
					7820	7813	1325.9	1325.23	3	3972.68	64.34	977.462	NVTHLLQQELTEAQK	-	No	0	0.94	4.59	11.97	-3	TRUE	8.85	4-6-1-1-0	1-0-1-1-0	HexNAc-Hex-Hex-Hex-(Hex-Hex-)Hex-HexNAc-HexNAc+Hex1DeHex1NeuAc1	Hex-Hex-Hex-Hex-(HexNAc-Hex-)Hex-HexNAc-HexNAc+Hex1DeHex1NeuAc1
					7858	7857	1013.76	1013.43	3	3037.26	64.65	770.2	ANNSWFQSILR	-	No	1	0.88	194.91	119.2	0	TRUE	0.32	2-8-0-0-0	0-1-0-0-0	Hex-Hex-Hex-Hex-Hex-(Hex-)Hex-HexNAc-HexNAc+HexNAc1	Hex-Hex-Hex-Hex-(Hex-Hex-)Hex-HexNAc-HexNAc+HexNAc1	Hex-Hex-Hex-(Hex-Hex-Hex-)Hex-HexNAc-HexNAc+HexNAc1
					7875	7868	1163.85	1163.51	3	3487.51	64.77	798.718	TGVHDADFESNVTATLASINK	-	No	0	0.97	1.47	10.86	0	TRUE	8.61	4-3-0-0-0	1-0-0-0-0	HexNAc-Hex-(Hex-)Hex-HexNAc-HexNAc+Hex1	Hex-(HexNAc-Hex-)Hex-HexNAc-HexNAc+Hex1
					7882	7879	1171.53	1171.53	3	3511.55	64.83	780.054	SLQNIQDDFNNAILVNTSK	-	No	0	0.76	13.79	31.76	0	TRUE	0.7	2-6-0-0-0	0-1-0-0-0	Hex-Hex-Hex-(Hex-)Hex-HexNAc-HexNAc+HexNAc1	Hex-Hex-(Hex-Hex-)Hex-HexNAc-HexNAc+HexNAc1
					7884	7879	1111.21	1110.87	3	3329.6	64.85	813.756	QVALQTFGNQTTIIPAGGAGYK	-	No	0	0.75	30.77	0	0	TRUE	5.35	3-3-0-0-0	1-0-0-0-0	Hex-(Hex-)Hex-HexNAc-HexNAc+Hex1
					7952	7945	921.219	920.412	5	4597.02	65.36	678.089	AHCVWLECPIPDAPVVTNVTVK	-	No	0	0.84	17.26	25.03	0	TRUE	3.93	4-7-1-0-0	0-1-0-0-0	HexNAc-Hex-Hex-Hex-(Hex-HexNAc-Hex-)Hex-HexNAc-(DeHex-)HexNAc+HexNAc1	Hex-HexNAc-Hex-Hex-Hex-(HexNAc-Hex-)Hex-HexNAc-(DeHex-)HexNAc+HexNAc1	HexNAc-Hex-Hex-(Hex-)Hex-(HexNAc-Hex-)Hex-HexNAc-(DeHex-)HexNAc+HexNAc1	HexNAc-Hex-Hex-Hex-(HexNAc-(Hex-)Hex-)Hex-HexNAc-(DeHex-)HexNAc+HexNAc1
					7957	7956	785.61	785.361	4	3137.42	65.4	592.323	TNSTFVQALVEHVK	-	No	0	0.99	104.86	23.78	0	TRUE	5.99	3-5-1-0-0	0-0-1-0-0	HexNAc-Hex-(Hex-Hex-Hex-)Hex-HexNAc-HexNAc+DeHex1	HexNAc-Hex-(Hex-(Hex-)Hex-)Hex-HexNAc-HexNAc+DeHex1	Hex-HexNAc-Hex-(Hex-Hex-)Hex-HexNAc-HexNAc+DeHex1	HexNAc-(Hex-)Hex-(Hex-Hex-)Hex-HexNAc-HexNAc+DeHex1	HexNAc-(Hex-Hex-)Hex-(Hex-)Hex-HexNAc-HexNAc+DeHex1	Hex-HexNAc-(Hex-)Hex-(Hex-)Hex-HexNAc-HexNAc+DeHex1
					7963	7956	1158.19	1157.51	3	3469.51	65.44	787.428	DLVVQQLVNVSR	-	No	0	0.72	24.72	134.33	0	TRUE	7.95	5-4-1-1-0	1-0-0-0-0	NeuAc-Hex-HexNAc-Hex-(HexNAc-Hex-)Hex-HexNAc-(DeHex-)HexNAc+Hex1	NeuAc-Hex-HexNAc-(HexNAc-)Hex-(Hex-)Hex-HexNAc-(DeHex-)HexNAc+Hex1
					7985	7978	871.407	871.08	3	2610.22	65.62	592.323	TNSTFVQALVEHVK	-	No	0	0.89	16.58	0	0	TRUE	2.71	2-3-1-0-0	0-0-1-0-0	Hex-(Hex-)Hex-HexNAc-HexNAc+DeHex1
					7990	7989	1060.12	1059.79	3	3176.34	65.66	654.638	ASVSFLNFNLSNCER	-	No	0	0.9	1.16	7.77	0	TRUE	3.07	3-5-0-0-0	0-1-0-0-0	HexNAc-(Hex-)Hex-(Hex-)Hex-HexNAc-HexNAc+HexNAc1	Hex-HexNAc-Hex-(Hex-)Hex-HexNAc-HexNAc+HexNAc1	HexNAc-Hex-(Hex-Hex-)Hex-HexNAc-HexNAc+HexNAc1
					7992	7989	1203.24	1203.24	3	3606.69	65.67	1285.17	YLQPLLAVQFTNLTMDTEIR	-	No	0	0.9	5.97	2.2	0	TRUE	4.06	3-3-1-0-0	0-0-1-0-0	HexNAc-Hex-(Hex-)Hex-HexNAc-HexNAc+DeHex1	Hex-(HexNAc-Hex-)Hex-HexNAc-HexNAc+DeHex1
					7996	7989	1069.49	1069.24	4	4272.91	65.7	678.089	AHCVWLECPIPDAPVVTNVTVK	-	No	0	0.84	14.75	12.05	-2	TRUE	3.09	4-5-1-0-0	1-1-0-0-0	Hex-Hex-(HexNAc-Hex-)Hex-HexNAc-(DeHex-)HexNAc+Hex1HexNAc1
					7998	7989	1047.48	1046.81	3	3137.42	65.72	969.986	LDMSQNVSLVTAELSK	-	No	1	1	103.68	5.2	0	TRUE	4.36	3-4-1-0-0	0-0-1-0-0	Hex-Hex-(HexNAc-Hex-)Hex-HexNAc-HexNAc+DeHex1
					8012	8011	742.955	742.553	5	3707.73	65.83	491.23	HIVINGSSFGADGFPYVQVLK	-	No	0	0.93	0.61	0.44	0	TRUE	4.28	4-4-0-0-0	1-0-0-0-0	Hex-Hex-(HexNAc-Hex-)Hex-HexNAc-HexNAc+Hex1
					8018	8011	861.596	861.189	5	4300.91	65.88	491.23	SNTSQLAFLLYNDQPPQPSK	-	No	0	0.88	5.65	14.12	-3	TRUE	3.86	7-3-1-0-0	2-0-1-0-0	HexNAc-(HexNAc-)Hex-(HexNAc-Hex-)Hex-HexNAc-HexNAc+Hex2DeHex1	HexNAc-Hex-(HexNAc-(HexNAc-)Hex-)Hex-HexNAc-HexNAc+Hex2DeHex1
					8031	8022	1026.09	1025.76	3	3074.25	65.98	625.943	EFGFAWPESLNCSK	-	No	0	0.85	2.71	6.39	0	TRUE	0.32	3-4-1-0-0	0-1-0-0-0	HexNAc-Hex-(Hex-)Hex-HexNAc-(DeHex-)HexNAc+HexNAc1	Hex-(HexNAc-Hex-)Hex-HexNAc-(DeHex-)HexNAc+HexNAc1
					8056	8055	856.197	855.595	5	4272.94	66.16	514.493	YLQPLLAVQFTNLTMDTEIR	-	No	0	0.92	1.96	17.21	0	TRUE	5.49	7-3-0-0-0	1-0-0-0-0	HexNAc-(HexNAc-)Hex-(HexNAc-(HexNAc-)Hex-)Hex-HexNAc-HexNAc+Hex1
					8060	8055	1477.99	1477.64	3	4429.91	66.19	1466.55	TDDEVVQREEEAIQLDGLNASQIR	-	No	1	0.81	139.17	6.07	-3	TRUE	2.2	2-8-0-0-0	0-3-0-0-0	Hex-Hex-Hex-(Hex-)Hex-HexNAc-HexNAc+HexNAc3	Hex-Hex-(Hex-Hex-)Hex-HexNAc-HexNAc+HexNAc3
					8073	8066	1424.3	1423.97	3	4268.9	66.29	888.786	FNPNISWQPIPVHTVPITEDR	-	No	0	0.97	0.9	3.6	0	TRUE	8.92	5-4-1-0-0	1-0-0-0-0	Hex-Hex-(HexNAc-(HexNAc-)Hex-)Hex-HexNAc-(DeHex-)HexNAc+Hex1	Hex-(HexNAc-)Hex-(HexNAc-Hex-)Hex-HexNAc-(DeHex-)HexNAc+Hex1
					8093	8088	903.428	902.676	4	3606.67	66.44	643.089	YLQPLLAVQFTNLTMDTEIR	-	No	0	0.95	6.68	2.8	0	TRUE	8.19	3-3-1-0-0	0-0-1-0-0	HexNAc-Hex-(Hex-)Hex-HexNAc-HexNAc+DeHex1	Hex-(HexNAc-Hex-)Hex-HexNAc-HexNAc+DeHex1
					8097	8088	1219.18	1219.18	3	3654.53	66.47	920.11	IAVDWESLGYNITR	-	No	0	0.73	8.4	21.07	0	TRUE	2.47	3-6-1-1-0	0-0-0-1-0	Hex-(DeHex-)HexNAc-Hex-(Hex-Hex-Hex-)Hex-HexNAc-HexNAc+NeuAc1	Hex-(DeHex-)HexNAc-(Hex-)Hex-(Hex-Hex-)Hex-HexNAc-HexNAc+NeuAc1	DeHex-HexNAc-(Hex-)Hex-(Hex-Hex-Hex-)Hex-HexNAc-HexNAc+NeuAc1	DeHex-HexNAc-(Hex-)Hex-(Hex-(Hex-)Hex-)Hex-HexNAc-HexNAc+NeuAc1	DeHex-HexNAc-(Hex-Hex-)Hex-(Hex-Hex-)Hex-HexNAc-HexNAc+NeuAc1	Hex-Hex-Hex-(DeHex-HexNAc-(Hex-)Hex-)Hex-HexNAc-HexNAc+NeuAc1	Hex-Hex-Hex-Hex-(DeHex-HexNAc-Hex-)Hex-HexNAc-HexNAc+NeuAc1	Hex-(Hex-)Hex-(DeHex-HexNAc-(Hex-)Hex-)Hex-HexNAc-HexNAc+NeuAc1	Hex-(Hex-Hex-)Hex-(DeHex-HexNAc-Hex-)Hex-HexNAc-HexNAc+NeuAc1	Hex-Hex-(Hex-)Hex-(DeHex-HexNAc-Hex-)Hex-HexNAc-HexNAc+NeuAc1	Hex-(DeHex-)HexNAc-Hex-(Hex-(Hex-)Hex-)Hex-HexNAc-HexNAc+NeuAc1
					8108	8099	1299.91	1299.24	3	3894.7	66.55	818.069	SNTSQLAFLLYNDQPPQPSK	-	No	0	0.97	8.26	0	-3	TRUE	9.03	5-3-1-0-0	3-0-0-0-0	Hex-(Hex-)Hex-HexNAc-(DeHex-)HexNAc+Hex3
					8113	8110	975.187	974.684	4	3894.7	66.59	721.582	GTEVNTTVIGENDPIDEVQGFLFGK	-	No	0	0.97	44.79	9.01	0	TRUE	9.28	2-5-0-0-0	0-1-0-0-0	Hex-Hex-(Hex-)Hex-HexNAc-HexNAc+HexNAc1	Hex-(Hex-Hex-)Hex-HexNAc-HexNAc+HexNAc1
					8117	8110	1379.62	1378.95	3	4133.82	66.61	878.768	VENGSETGPLPPELQPLLEGEVK	-	No	0	0.86	2.08	8.48	0	TRUE	3.54	2-8-0-0-0	0-1-0-0-0	Hex-Hex-Hex-(Hex-Hex-Hex-)Hex-HexNAc-HexNAc+HexNAc1	Hex-Hex-Hex-Hex-(Hex-Hex-)Hex-HexNAc-HexNAc+HexNAc1	Hex-Hex-Hex-Hex-Hex-(Hex-)Hex-HexNAc-HexNAc+HexNAc1
					8122	8121	1316.26	1315.59	3	3943.76	66.65	1262.9	DIENLKDASSFLAEWQNITK	-	No	0	0.69	10.76	0.78	0	TRUE	1.92	4-5-0-0-0	0-1-0-0-0	Hex-HexNAc-(HexNAc-)Hex-(Hex-)Hex-HexNAc-HexNAc+HexNAc1	HexNAc-(Hex-HexNAc-)Hex-(Hex-)Hex-HexNAc-HexNAc+HexNAc1	HexNAc-(HexNAc-)Hex-(Hex-Hex-)Hex-HexNAc-HexNAc+HexNAc1	HexNAc-(Hex-)Hex-(HexNAc-Hex-)Hex-HexNAc-HexNAc+HexNAc1	Hex-HexNAc-Hex-(HexNAc-Hex-)Hex-HexNAc-HexNAc+HexNAc1	HexNAc-Hex-(HexNAc-(Hex-)Hex-)Hex-HexNAc-HexNAc+HexNAc1	HexNAc-Hex-(Hex-HexNAc-Hex-)Hex-HexNAc-HexNAc+HexNAc1
					8126	8121	1324.61	1323.93	3	3968.77	66.69	1466.71	TDDEVVQREEEAIQLDGLNASQIR	-	No	1	0.78	167.76	0.73	0	TRUE	6.03	3-3-1-0-0	0-0-1-0-0	HexNAc-Hex-(Hex-)Hex-HexNAc-HexNAc+DeHex1	Hex-(HexNAc-Hex-)Hex-HexNAc-HexNAc+DeHex1
					8139	8132	980.675	980.184	4	3916.71	66.79	717.357	ELGPLYTNITADIGTDPR	-	No	0	0.65	10.94	33.7	0	TRUE	0.56	5-5-1-0-0	0-1-0-0-0	DeHex-HexNAc-(HexNAc-)Hex-(Hex-(HexNAc-)Hex-)Hex-HexNAc-HexNAc+HexNAc1	DeHex-HexNAc-(Hex-)Hex-(HexNAc-(HexNAc-)Hex-)Hex-HexNAc-HexNAc+HexNAc1
					8188	8187	1432.3	1431.29	3	4290.85	67.19	1376.67	GCSSSTSVLLTLDNNVVNGSSPAIR	-	No	0	0.94	3.19	9.11	-2	TRUE	6.14	3-7-0-0-0	1-1-0-0-0	Hex-Hex-Hex-Hex-(Hex-)Hex-HexNAc-HexNAc+Hex1HexNAc1	Hex-Hex-(Hex-Hex-Hex-)Hex-HexNAc-HexNAc+Hex1HexNAc1	Hex-Hex-Hex-(Hex-Hex-)Hex-HexNAc-HexNAc+Hex1HexNAc1
					8199	8198	1334.25	1334.25	3	3999.73	67.28	1169.42	SLQNIQDDFNNAILVNTSK	-	No	1	0.75	116.36	3.24	-2	TRUE	7.75	6-4-0-0-0	2-0-0-0-0	Hex-Hex-(HexNAc-(HexNAc-)Hex-)Hex-HexNAc-HexNAc+Hex2	Hex-(HexNAc-)Hex-(HexNAc-Hex-)Hex-HexNAc-HexNAc+Hex2
					8225	8220	1296.22	1296.22	3	3885.65	67.48	926.966	HPDAVAWANLTNAIR	-	No	0	0.82	3.31	31.22	0	TRUE	3.9	4-7-0-1-0	0-1-0-0-0	NeuAc-Hex-HexNAc-Hex-(HexNAc-(Hex-Hex-)Hex-)Hex-HexNAc-HexNAc+HexNAc1	NeuAc-Hex-HexNAc-Hex-(Hex-HexNAc-(Hex-)Hex-)Hex-HexNAc-HexNAc+HexNAc1	NeuAc-Hex-HexNAc-(HexNAc-)Hex-(Hex-(Hex-)Hex-)Hex-HexNAc-HexNAc+HexNAc1	NeuAc-Hex-HexNAc-(HexNAc-)Hex-(Hex-Hex-Hex-)Hex-HexNAc-HexNAc+HexNAc1	NeuAc-Hex-HexNAc-(Hex-HexNAc-)Hex-(Hex-Hex-)Hex-HexNAc-HexNAc+HexNAc1
					8238	8231	1311.57	1311.57	3	3931.69	67.59	1379.66	ALYELAGGTNFSDTVQADPQTVTR	-	No	0	0.79	118.47	25.41	0	TRUE	8.88	2-6-0-0-0	0-1-0-0-0	Hex-Hex-Hex-(Hex-)Hex-HexNAc-HexNAc+HexNAc1	Hex-Hex-(Hex-Hex-)Hex-HexNAc-HexNAc+HexNAc1
					8278	8275	1235.54	1235.21	3	3702.61	67.91	1019.98	ANIQFGDNGTTISAVSNK	-	No	0	0.68	15.84	3.21	-3	TRUE	0.92	6-4-0-0-0	2-1-0-0-0	HexNAc-(HexNAc-)Hex-(Hex-)Hex-HexNAc-HexNAc+Hex2HexNAc1	HexNAc-Hex-(HexNAc-Hex-)Hex-HexNAc-HexNAc+Hex2HexNAc1
					8291	8286	914.405	914.072	3	2739.19	68.03	688.84	IVDVNLTSEGK	-	No	0	0.87	5.54	4.62	0	TRUE	2.23	3-5-1-0-0	0-0-1-0-0	Hex-HexNAc-Hex-(Hex-Hex-)Hex-HexNAc-HexNAc+DeHex1	HexNAc-(Hex-)Hex-(Hex-Hex-)Hex-HexNAc-HexNAc+DeHex1	HexNAc-(Hex-Hex-)Hex-(Hex-)Hex-HexNAc-HexNAc+DeHex1	Hex-HexNAc-(Hex-)Hex-(Hex-)Hex-HexNAc-HexNAc+DeHex1	HexNAc-Hex-(Hex-(Hex-)Hex-)Hex-HexNAc-HexNAc+DeHex1	HexNAc-Hex-(Hex-Hex-Hex-)Hex-HexNAc-HexNAc+DeHex1
					8295	8286	1296.22	1295.9	3	3884.67	68.05	977.5	NVTHLLQQELTEAQK	-	No	0	0.73	13	149.87	0	TRUE	7.79	5-6-1-0-0	0-1-0-0-0	DeHex-HexNAc-(Hex-HexNAc-)Hex-(HexNAc-(Hex-)Hex-)Hex-HexNAc-HexNAc+HexNAc1	DeHex-HexNAc-(Hex-HexNAc-)Hex-(Hex-HexNAc-Hex-)Hex-HexNAc-HexNAc+HexNAc1	DeHex-HexNAc-(HexNAc-)Hex-(Hex-(Hex-HexNAc-)Hex-)Hex-HexNAc-HexNAc+HexNAc1	DeHex-HexNAc-(Hex-)Hex-(HexNAc-(Hex-HexNAc-)Hex-)Hex-HexNAc-HexNAc+HexNAc1	DeHex-HexNAc-(HexNAc-)Hex-(Hex-HexNAc-(Hex-)Hex-)Hex-HexNAc-HexNAc+HexNAc1	Hex-HexNAc-(Hex-HexNAc-)Hex-(DeHex-HexNAc-Hex-)Hex-HexNAc-HexNAc+HexNAc1	Hex-HexNAc-(HexNAc-)Hex-(DeHex-HexNAc-(Hex-)Hex-)Hex-HexNAc-HexNAc+HexNAc1	Hex-HexNAc-Hex-HexNAc-Hex-(DeHex-HexNAc-Hex-)Hex-HexNAc-HexNAc+HexNAc1	HexNAc-Hex-HexNAc-Hex-(DeHex-HexNAc-(Hex-)Hex-)Hex-HexNAc-HexNAc+HexNAc1	Hex-HexNAc-Hex-HexNAc-(DeHex-HexNAc-)Hex-(Hex-)Hex-HexNAc-HexNAc+HexNAc1	DeHex-HexNAc-(HexNAc-)Hex-(HexNAc-(Hex-Hex-)Hex-)Hex-HexNAc-HexNAc+HexNAc1
					8300	8297	914.402	914.07	3	2739.19	68.09	538.269	ALSNISLR	-	No	0	0.91	5.45	10.38	-2	TRUE	3.92	6-4-0-0-0	2-0-0-0-0	HexNAc-Hex-(Hex-HexNAc-Hex-)Hex-HexNAc-HexNAc+Hex2	Hex-HexNAc-Hex-(HexNAc-Hex-)Hex-HexNAc-HexNAc+Hex2	HexNAc-(Hex-)Hex-(HexNAc-Hex-)Hex-HexNAc-HexNAc+Hex2	HexNAc-(HexNAc-)Hex-(Hex-Hex-)Hex-HexNAc-HexNAc+Hex2	HexNAc-(Hex-HexNAc-)Hex-(Hex-)Hex-HexNAc-HexNAc+Hex2	Hex-HexNAc-(HexNAc-)Hex-(Hex-)Hex-HexNAc-HexNAc+Hex2	HexNAc-Hex-(HexNAc-(Hex-)Hex-)Hex-HexNAc-HexNAc+Hex2
					8311	8308	1203.19	1202.53	3	3604.57	68.18	680.323	ANIQFGDNGTTISAVSNK	-	No	0	0.9	0.61	1.71	-2	TRUE	3.12	4-5-1-0-0	1-0-1-0-0	HexNAc-Hex-Hex-Hex-(Hex-)Hex-HexNAc-HexNAc+Hex1DeHex1	Hex-Hex-Hex-(HexNAc-Hex-)Hex-HexNAc-HexNAc+Hex1DeHex1
					8317	8308	843.391	843.145	4	3368.55	68.22	623.801	RPPLAELAALNLSGSR	-	No	0	0.97	1.53	0.8	-2	TRUE	9.2	6-3-0-0-0	2-0-0-0-0	HexNAc-(HexNAc-)Hex-(Hex-)Hex-HexNAc-HexNAc+Hex2	HexNAc-Hex-(HexNAc-Hex-)Hex-HexNAc-HexNAc+Hex2
					8320	8319	1267.9	1267.22	3	3798.65	68.25	1150.96	TTLVDNNTWNNSHIALVGK	-	No	1	0.88	104.37	19.21	0	TRUE	1.41	2-8-0-0-0	0-1-0-0-0	Hex-Hex-Hex-Hex-Hex-(Hex-)Hex-HexNAc-HexNAc+HexNAc1	Hex-Hex-Hex-Hex-(Hex-Hex-)Hex-HexNAc-HexNAc+HexNAc1	Hex-Hex-Hex-(Hex-Hex-Hex-)Hex-HexNAc-HexNAc+HexNAc1
					8322	8319	1021.42	1020.75	3	3059.23	68.26	539.569	TFYWDFYTNR	-	No	0	0.92	2.01	0	-3	TRUE	2.31	5-3-1-0-0	3-0-0-0-0	Hex-(Hex-)Hex-HexNAc-(DeHex-)HexNAc+Hex3
					8335	8330	904.931	904.432	4	3613.7	68.37	926.966	ALESSAPNLQLETSDVLANVTYLK	-	No	0	0.96	16.72	0	0	TRUE	6.55	2-3-1-0-0	0-0-1-0-0	Hex-(Hex-)Hex-HexNAc-HexNAc+DeHex1
					8357	8352	967.066	966.738	3	2897.19	68.55	719.325	ELAVPDGYTNR	-	No	0	0.95	11.24	1.48	-3	TRUE	7.25	5-4-0-0-0	3-0-0-0-0	Hex-Hex-(Hex-)Hex-HexNAc-HexNAc+Hex3	Hex-(Hex-Hex-)Hex-HexNAc-HexNAc+Hex3
					8392	8385	901.408	901.408	4	3601.6	68.86	444.982	GVFITNETGQPLIGK	-	No	0	0.75	8.2	35.03	-3	TRUE	2.3	6-5-0-0-0	3-0-0-0-0	HexNAc-(Hex-Hex-)Hex-(Hex-)Hex-HexNAc-HexNAc+Hex3	Hex-HexNAc-(Hex-)Hex-(Hex-)Hex-HexNAc-HexNAc+Hex3	HexNAc-(Hex-)Hex-(Hex-Hex-)Hex-HexNAc-HexNAc+Hex3	Hex-HexNAc-Hex-(Hex-Hex-)Hex-HexNAc-HexNAc+Hex3	HexNAc-Hex-(Hex-(Hex-)Hex-)Hex-HexNAc-HexNAc+Hex3	HexNAc-Hex-(Hex-Hex-Hex-)Hex-HexNAc-HexNAc+Hex3
					8476	8473	1312.58	1311.91	3	3932.7	69.66	1294.79	TPLVQEVHQNFSAWCSQVVR	-	No	0	0.59	63.16	3.3	-1	TRUE	5.4	3-4-0-1-0	0-0-0-1-0	HexNAc-(Hex-)Hex-(Hex-)Hex-HexNAc-HexNAc+NeuAc1	Hex-HexNAc-Hex-(Hex-)Hex-HexNAc-HexNAc+NeuAc1	HexNAc-Hex-(Hex-Hex-)Hex-HexNAc-HexNAc+NeuAc1
					8482	8473	1111.52	1111.18	3	3330.53	69.71	711.375	LNYSLPTGQWVGVQLPR	-	No	0	0.91	2.85	6.77	0	TRUE	3.23	3-4-1-0-0	0-1-0-0-0	HexNAc-Hex-(Hex-)Hex-HexNAc-(DeHex-)HexNAc+HexNAc1	Hex-(HexNAc-Hex-)Hex-HexNAc-(DeHex-)HexNAc+HexNAc1
					8487	8484	1188.87	1188.54	3	3562.6	69.75	1263.52	DIENLKDASSFLAEWQNITK	-	No	1	0.5	52.75	6.02	0	TRUE	7.47	3-3-1-0-0	0-0-1-0-0	HexNAc-Hex-(Hex-)Hex-HexNAc-HexNAc+DeHex1	Hex-(HexNAc-Hex-)Hex-HexNAc-HexNAc+DeHex1
					8507	8506	1171.15	1171.15	3	3510.44	69.93	722.69	VWNSTFIEDYRDFDR	-	No	0	0.58	4.5	102.35	0	TRUE	1.53	3-4-0-1-0	0-0-0-1-0	Hex-Hex-(HexNAc-Hex-)Hex-HexNAc-HexNAc+NeuAc1
					8612	8605	1092.44	1092.11	3	3273.3	70.88	741.12	DLCGPDAGPIGNATGQADCK	-	No	0	0.93	17.18	13.94	0	TRUE	4.55	3-4-0-0-0	0-1-0-0-0	HexNAc-Hex-(Hex-)Hex-HexNAc-HexNAc+HexNAc1	Hex-(HexNAc-Hex-)Hex-HexNAc-HexNAc+HexNAc1
					8691	8682	1181.48	1181.48	3	3541.42	71.61	699.84	KDTCTQECSYFNITK	-	No	0	0.93	25	0	-3	TRUE	6.14	5-3-1-0-0	3-0-0-0-0	Hex-(Hex-)Hex-HexNAc-(DeHex-)HexNAc+Hex3
					8698	8693	844.043	843.709	3	2528.11	71.68	657.591	GSLSYLNVTR	-	No	1	0.51	42.99	4.42	-2	TRUE	5.21	3-5-0-0-0	0-2-0-0-0	HexNAc-Hex-(Hex-)Hex-HexNAc-HexNAc+HexNAc2	Hex-(HexNAc-Hex-)Hex-HexNAc-HexNAc+HexNAc2
					8700	8693	1107	1106.5	4	4421.99	71.7	818.069	HIVINGSSFGADGFPYVQVLK	-	No	0	0.81	4.42	32.75	-3	TRUE	0.77	6-5-1-0-0	3-0-0-0-0	Hex-Hex-Hex-(HexNAc-Hex-)Hex-HexNAc-(DeHex-)HexNAc+Hex3	HexNAc-Hex-Hex-Hex-(Hex-)Hex-HexNAc-(DeHex-)HexNAc+Hex3
					8720	8715	1027.7	1027.44	4	4105.74	71.88	920.955	SNETNGYLDSAQAGPAAGPGAPGTAAGR	-	No	0	0.9	11.65	7.88	0	TRUE	4.99	3-4-0-1-0	0-0-0-1-0	HexNAc-Hex-(Hex-Hex-)Hex-HexNAc-HexNAc+NeuAc1	Hex-HexNAc-Hex-(Hex-)Hex-HexNAc-HexNAc+NeuAc1	HexNAc-(Hex-)Hex-(Hex-)Hex-HexNAc-HexNAc+NeuAc1
					8722	8715	1228.17	1227.51	3	3679.5	71.89	741.12	DLCGPDAGPIGNATGQADCK	-	No	0	0.88	31.49	14.02	-3	TRUE	5.04	5-4-0-0-0	2-1-0-0-0	HexNAc-Hex-(Hex-)Hex-HexNAc-HexNAc+Hex2HexNAc1	Hex-(HexNAc-Hex-)Hex-HexNAc-HexNAc+Hex2HexNAc1
					8731	8726	1066.24	1065.74	4	4258.92	71.98	845.101	TAADTTGLQPILNQFTPANISR	-	No	0	0.85	1.96	18.82	-2	TRUE	2.06	4-6-1-0-0	0-2-0-0-0	HexNAc-(Hex-HexNAc-)Hex-(Hex-)Hex-HexNAc-(DeHex-)HexNAc+HexNAc2	HexNAc-Hex-(HexNAc-(Hex-)Hex-)Hex-HexNAc-(DeHex-)HexNAc+HexNAc2	HexNAc-Hex-(Hex-HexNAc-Hex-)Hex-HexNAc-(DeHex-)HexNAc+HexNAc2
					8751	8748	1224.04	1223.78	4	4891.09	72.17	798.718	TGVHDADFESNVTATLASINK	-	No	0	0.82	9.82	157.49	-3	TRUE	8.29	7-7-1-0-0	3-0-0-0-0	HexNAc-Hex-Hex-Hex-(Hex-Hex-(HexNAc-)Hex-)Hex-HexNAc-(DeHex-)HexNAc+Hex3
					8808	8803	1060.47	1060.14	3	3177.41	72.69	722.69	DVTVIEGEVATISCQVNK	-	No	0	0.7	20.26	15.32	0	TRUE	1	2-5-0-0-0	0-1-0-0-0	Hex-Hex-(Hex-)Hex-HexNAc-HexNAc+HexNAc1	Hex-(Hex-Hex-)Hex-HexNAc-HexNAc+HexNAc1
					8821	8814	1140.14	1139.79	3	3416.36	72.82	674.681	VINETWAWK	-	No	1	0.51	25.19	133	-3	TRUE	6.65	4-9-0-0-0	0-3-0-0-0	Hex-HexNAc-Hex-(HexNAc-(Hex-Hex-)Hex-)Hex-HexNAc-HexNAc+HexNAc3	HexNAc-Hex-HexNAc-Hex-(Hex-Hex-Hex-)Hex-HexNAc-HexNAc+HexNAc3	HexNAc-Hex-HexNAc-Hex-(Hex-(Hex-)Hex-)Hex-HexNAc-HexNAc+HexNAc3	Hex-HexNAc-Hex-HexNAc-Hex-(Hex-Hex-)Hex-HexNAc-HexNAc+HexNAc3	HexNAc-Hex-HexNAc-(Hex-Hex-)Hex-(Hex-)Hex-HexNAc-HexNAc+HexNAc3	Hex-HexNAc-Hex-HexNAc-(Hex-)Hex-(Hex-)Hex-HexNAc-HexNAc+HexNAc3	HexNAc-Hex-HexNAc-(Hex-)Hex-(Hex-Hex-)Hex-HexNAc-HexNAc+HexNAc3	HexNAc-(Hex-)Hex-(HexNAc-(Hex-Hex-)Hex-)Hex-HexNAc-HexNAc+HexNAc3	HexNAc-(Hex-)Hex-(Hex-HexNAc-(Hex-)Hex-)Hex-HexNAc-HexNAc+HexNAc3	HexNAc-(Hex-Hex-)Hex-(HexNAc-(Hex-)Hex-)Hex-HexNAc-HexNAc+HexNAc3	HexNAc-(Hex-Hex-)Hex-(Hex-HexNAc-Hex-)Hex-HexNAc-HexNAc+HexNAc3	Hex-HexNAc-Hex-(Hex-HexNAc-(Hex-)Hex-)Hex-HexNAc-HexNAc+HexNAc3
					8834	8825	1238.53	1238.28	4	4949.11	72.96	1067.15	GLDFFQSPSFCPNPPGLEALSPNTSCR	-	No	1	0.94	46.77	84.33	0	TRUE	9.27	5-4-0-1-0	0-0-0-1-0	HexNAc-(Hex-)Hex-(HexNAc-(HexNAc-)Hex-)Hex-HexNAc-HexNAc+NeuAc1	HexNAc-(HexNAc-)Hex-(Hex-(HexNAc-)Hex-)Hex-HexNAc-HexNAc+NeuAc1	Hex-HexNAc-(HexNAc-)Hex-(HexNAc-Hex-)Hex-HexNAc-HexNAc+NeuAc1	HexNAc-Hex-HexNAc-(HexNAc-)Hex-(Hex-)Hex-HexNAc-HexNAc+NeuAc1	HexNAc-Hex-HexNAc-Hex-(HexNAc-Hex-)Hex-HexNAc-HexNAc+NeuAc1	Hex-HexNAc-Hex-(HexNAc-(HexNAc-)Hex-)Hex-HexNAc-HexNAc+NeuAc1
					8854	8847	1212.85	1212.52	3	3634.55	73.14	987.859	SAFDPPDIPVCLLGNR	-	No	1	0.78	140.15	37.34	0	TRUE	6.78	2-9-0-0-0	0-1-0-0-0	Hex-Hex-Hex-Hex-Hex-Hex-(Hex-)Hex-HexNAc-HexNAc+HexNAc1	Hex-Hex-Hex-Hex-Hex-(Hex-Hex-)Hex-HexNAc-HexNAc+HexNAc1	Hex-Hex-Hex-Hex-(Hex-Hex-Hex-)Hex-HexNAc-HexNAc+HexNAc1	Hex-Hex-Hex-(Hex-Hex-Hex-Hex-)Hex-HexNAc-HexNAc+HexNAc1
					8863	8858	1175.07	1174.81	4	4695.23	73.22	824.178	VTVLGVATAPQQVLSNGVPVSNFTYSPDTK	-	No	0	0.85	13.28	14.75	-3	TRUE	4.68	4-4-1-0-0	1-1-1-0-0	HexNAc-Hex-(Hex-)Hex-HexNAc-HexNAc+Hex1HexNAc1DeHex1	Hex-(HexNAc-Hex-)Hex-HexNAc-HexNAc+Hex1HexNAc1DeHex1
					8867	8858	1098.17	1097.84	3	3290.49	73.26	895.98	SGVINLTEEVLWVK	-	No	0	0.95	67.8	13.15	0	TRUE	7.12	6-3-0-0-0	1-0-0-0-0	HexNAc-Hex-(HexNAc-(HexNAc-)Hex-)Hex-HexNAc-HexNAc+Hex1	HexNAc-(HexNAc-)Hex-(HexNAc-Hex-)Hex-HexNAc-HexNAc+Hex1
					8876	8869	1261.57	1261.25	3	3780.73	73.34	935.128	RPPLAELAALNLSGSR	-	No	0	0.94	2	1.75	-3	TRUE	6.65	5-5-0-1-0	2-0-0-1-0	Hex-HexNAc-Hex-(Hex-Hex-)Hex-HexNAc-HexNAc+Hex2NeuAc1	HexNAc-(Hex-)Hex-(Hex-Hex-)Hex-HexNAc-HexNAc+Hex2NeuAc1	HexNAc-(Hex-Hex-)Hex-(Hex-)Hex-HexNAc-HexNAc+Hex2NeuAc1	Hex-HexNAc-(Hex-)Hex-(Hex-)Hex-HexNAc-HexNAc+Hex2NeuAc1	HexNAc-Hex-(Hex-(Hex-)Hex-)Hex-HexNAc-HexNAc+Hex2NeuAc1	HexNAc-Hex-(Hex-Hex-Hex-)Hex-HexNAc-HexNAc+Hex2NeuAc1
					8889	8880	1138.5	1138.17	3	3411.48	73.47	597.655	LNDTYVNVGLYSTK	-	No	0	0.83	2.66	32.77	-3	TRUE	2.22	5-5-0-0-0	3-0-0-0-0	Hex-Hex-(Hex-Hex-)Hex-HexNAc-HexNAc+Hex3	Hex-Hex-Hex-(Hex-)Hex-HexNAc-HexNAc+Hex3
					8969	8968	1193.52	1192.86	3	3575.55	74.11	977.125	DYYPINESLASLPLR	-	No	0	0.6	14.87	18.7	0	TRUE	5.05	5-5-0-0-0	0-1-0-0-0	Hex-HexNAc-(HexNAc-)Hex-(HexNAc-Hex-)Hex-HexNAc-HexNAc+HexNAc1	HexNAc-(Hex-HexNAc-)Hex-(HexNAc-Hex-)Hex-HexNAc-HexNAc+HexNAc1	HexNAc-(HexNAc-)Hex-(HexNAc-(Hex-)Hex-)Hex-HexNAc-HexNAc+HexNAc1	HexNAc-(HexNAc-)Hex-(Hex-HexNAc-Hex-)Hex-HexNAc-HexNAc+HexNAc1
					8982	8979	767.113	766.614	4	3062.43	74.22	353.468	IPLVNISLLPK	-	No	0	0.79	3.87	46.53	-2	TRUE	2.87	3-5-1-1-0	1-0-0-1-0	Hex-Hex-(Hex-Hex-)Hex-HexNAc-(DeHex-)HexNAc+Hex1NeuAc1	Hex-Hex-Hex-(Hex-)Hex-HexNAc-(DeHex-)HexNAc+Hex1NeuAc1
					9015	9012	1488	1487.33	3	4458.96	74.53	987.825	SLDAYPILNQAQALENHTEVQFQK	-	No	1	0.83	46.74	140.08	0	TRUE	2.19	2-8-0-0-0	0-1-0-0-0	Hex-Hex-Hex-(Hex-Hex-Hex-)Hex-HexNAc-HexNAc+HexNAc1	Hex-Hex-Hex-Hex-Hex-(Hex-)Hex-HexNAc-HexNAc+HexNAc1	Hex-Hex-Hex-Hex-(Hex-Hex-)Hex-HexNAc-HexNAc+HexNAc1
					9024	9023	1034.71	1034.46	4	4133.81	74.6	879.448	VENGSETGPLPPELQPLLEGEVK	-	No	1	0.74	43.62	81.66	0	TRUE	6.38	2-8-0-0-0	0-1-0-0-0	Hex-Hex-Hex-Hex-Hex-(Hex-)Hex-HexNAc-HexNAc+HexNAc1	Hex-Hex-Hex-Hex-(Hex-Hex-)Hex-HexNAc-HexNAc+HexNAc1	Hex-Hex-Hex-(Hex-Hex-Hex-)Hex-HexNAc-HexNAc+HexNAc1
					9030	9023	1123	1122.75	4	4486.96	74.66	807.163	IGPGEPLELLCNVSGALPPAGR	-	No	1	0.57	15.7	94.77	0	TRUE	0.11	4-9-0-0-0	0-1-0-0-0	Hex-Hex-(HexNAc-)Hex-(Hex-Hex-(Hex-HexNAc-)Hex-)Hex-HexNAc-HexNAc+HexNAc1	Hex-Hex-Hex-Hex-(Hex-HexNAc-(Hex-HexNAc-)Hex-)Hex-HexNAc-HexNAc+HexNAc1	Hex-Hex-Hex-Hex-Hex-(HexNAc-(Hex-HexNAc-)Hex-)Hex-HexNAc-HexNAc+HexNAc1	Hex-Hex-Hex-Hex-Hex-(Hex-HexNAc-(HexNAc-)Hex-)Hex-HexNAc-HexNAc+HexNAc1	Hex-Hex-Hex-Hex-Hex-Hex-(HexNAc-(HexNAc-)Hex-)Hex-HexNAc-HexNAc+HexNAc1	Hex-Hex-(Hex-)Hex-(Hex-HexNAc-(Hex-HexNAc-)Hex-)Hex-HexNAc-HexNAc+HexNAc1	Hex-Hex-(Hex-Hex-)Hex-(HexNAc-(Hex-HexNAc-)Hex-)Hex-HexNAc-HexNAc+HexNAc1	Hex-Hex-(Hex-Hex-)Hex-(Hex-HexNAc-(HexNAc-)Hex-)Hex-HexNAc-HexNAc+HexNAc1	Hex-Hex-(Hex-Hex-Hex-)Hex-(HexNAc-(HexNAc-)Hex-)Hex-HexNAc-HexNAc+HexNAc1	Hex-Hex-Hex-(Hex-)Hex-(HexNAc-(Hex-HexNAc-)Hex-)Hex-HexNAc-HexNAc+HexNAc1	Hex-Hex-Hex-(Hex-)Hex-(Hex-HexNAc-(HexNAc-)Hex-)Hex-HexNAc-HexNAc+HexNAc1	Hex-Hex-Hex-(Hex-Hex-)Hex-(HexNAc-(HexNAc-)Hex-)Hex-HexNAc-HexNAc+HexNAc1	Hex-Hex-Hex-Hex-(Hex-)Hex-(HexNAc-(HexNAc-)Hex-)Hex-HexNAc-HexNAc+HexNAc1	Hex-HexNAc-(HexNAc-)Hex-(Hex-Hex-(Hex-Hex-)Hex-)Hex-HexNAc-HexNAc+HexNAc1	Hex-HexNAc-(HexNAc-)Hex-(Hex-Hex-Hex-(Hex-)Hex-)Hex-HexNAc-HexNAc+HexNAc1	Hex-HexNAc-(Hex-HexNAc-)Hex-(Hex-Hex-Hex-Hex-)Hex-HexNAc-HexNAc+HexNAc1	Hex-HexNAc-(Hex-HexNAc-)Hex-(Hex-(Hex-Hex-)Hex-)Hex-HexNAc-HexNAc+HexNAc1	Hex-HexNAc-(Hex-HexNAc-)Hex-(Hex-Hex-(Hex-)Hex-)Hex-HexNAc-HexNAc+HexNAc1	Hex-Hex-Hex-Hex-(Hex-HexNAc-)Hex-(HexNAc-Hex-)Hex-HexNAc-HexNAc+HexNAc1	Hex-Hex-Hex-(Hex-HexNAc-)Hex-(HexNAc-(Hex-)Hex-)Hex-HexNAc-HexNAc+HexNAc1	Hex-HexNAc-(HexNAc-)Hex-(Hex-Hex-Hex-Hex-Hex-)Hex-HexNAc-HexNAc+HexNAc1	Hex-HexNAc-(Hex-Hex-Hex-)Hex-(HexNAc-(Hex-)Hex-)Hex-HexNAc-HexNAc+HexNAc1	Hex-Hex-Hex-(Hex-HexNAc-)Hex-(Hex-HexNAc-Hex-)Hex-HexNAc-HexNAc+HexNAc1	Hex-Hex-(Hex-HexNAc-)Hex-(Hex-Hex-(HexNAc-)Hex-)Hex-HexNAc-HexNAc+HexNAc1	Hex-Hex-Hex-(HexNAc-)Hex-(Hex-Hex-(HexNAc-)Hex-)Hex-HexNAc-HexNAc+HexNAc1
					9065	9056	1103.52	1102.85	3	3305.52	74.99	1066.4	LNYSLPTGQWVGVQLPR	-	No	1	0.79	136.32	5.07	-2	TRUE	1.99	2-6-0-0-0	0-2-0-0-0	Hex-Hex-(Hex-)Hex-HexNAc-HexNAc+HexNAc2	Hex-(Hex-Hex-)Hex-HexNAc-HexNAc+HexNAc2
					9103	9100	957.462	957.462	3	2869.36	75.37	706.067	IPLVNISLLPK	-	No	0	0.94	14.56	1.87	-2	TRUE	9.1	5-4-0-0-0	1-1-0-0-0	HexNAc-(HexNAc-)Hex-(Hex-)Hex-HexNAc-HexNAc+Hex1HexNAc1	HexNAc-Hex-(HexNAc-Hex-)Hex-HexNAc-HexNAc+Hex1HexNAc1
					9129	9122	1293.6	1292.93	3	3875.76	75.61	1270.6	ILAPAYFILGGNQSGEGCVITR	-	No	1	0.78	112.34	3.85	-2	TRUE	5.48	2-7-0-0-0	0-2-0-0-0	Hex-Hex-Hex-(Hex-)Hex-HexNAc-HexNAc+HexNAc2	Hex-Hex-(Hex-Hex-)Hex-HexNAc-HexNAc+HexNAc2
					9131	9122	1058.49	1058.16	3	3171.45	75.62	1168.94	SLQNIQDDFNNAILVNTSK	-	No	1	0.68	26.74	0	-1	TRUE	0.85	2-3-1-0-0	0-0-1-0-0	Hex-(Hex-)Hex-HexNAc-HexNAc+DeHex1
					9156	9155	1239.57	1238.91	3	3713.71	75.88	1270.52	ILAPAYFILGGNQSGEGCVITR	-	No	1	0.72	110.39	1.01	-1	TRUE	6.31	2-6-0-0-0	0-1-0-0-0	Hex-Hex-Hex-(Hex-)Hex-HexNAc-HexNAc+HexNAc1	Hex-Hex-(Hex-Hex-)Hex-HexNAc-HexNAc+HexNAc1
					9158	9155	929.933	929.432	4	3713.7	75.9	635.825	ILAPAYFILGGNQSGEGCVITR	-	No	0	0.63	121.57	77.77	0	TRUE	4.08	2-6-0-0-0	0-1-0-0-0	Hex-Hex-Hex-(Hex-)Hex-HexNAc-HexNAc+HexNAc1	Hex-Hex-(Hex-Hex-)Hex-HexNAc-HexNAc+HexNAc1
					9175	9166	1185.21	1184.87	3	3551.59	76.05	1270.45	ILAPAYFILGGNQSGEGCVITR	-	No	1	0.57	111.51	0	-2	TRUE	9.9	2-5-0-0-0	0-2-0-0-0	Hex-(Hex-)Hex-HexNAc-HexNAc+HexNAc2
					9241	9232	1115.5	1115.5	3	3343.49	76.67	820.729	SLVTQYLNATGNR	-	No	0	0.65	26.23	24	-2	TRUE	7.81	7-3-0-0-0	2-0-0-0-0	HexNAc-(HexNAc-)Hex-(HexNAc-Hex-)Hex-HexNAc-HexNAc+Hex2	HexNAc-Hex-(HexNAc-(HexNAc-)Hex-)Hex-HexNAc-HexNAc+Hex2
					9270	9265	1190.87	1190.19	3	3567.56	76.95	1083.53	DVTVIEGEVATISCQVNK	-	No	0	0.68	13.91	18.15	-3	TRUE	2.4	4-4-1-0-0	2-0-1-0-0	Hex-Hex-(Hex-)Hex-HexNAc-HexNAc+Hex2DeHex1	Hex-(Hex-Hex-)Hex-HexNAc-HexNAc+Hex2DeHex1
					9274	9265	1379.3	1379.3	3	4134.87	76.99	1480.65	SLDAYPILNQAQALENHTEVQFQK	-	No	1	0.64	31.79	0	-3	TRUE	0.24	2-6-0-0-0	0-3-0-0-0	Hex-(Hex-)Hex-HexNAc-HexNAc+HexNAc3
					9303	9298	1415.38	1415.38	4	5657.5	77.33	1003.44	GHEVEDVDLELFNTSVQLQPPTTAPGPETAAFIER	-	No	0	0.91	10.9	4.88	-3	TRUE	7.85	6-3-1-0-0	3-0-0-0-0	HexNAc-Hex-(Hex-)Hex-HexNAc-(DeHex-)HexNAc+Hex3	Hex-(HexNAc-Hex-)Hex-HexNAc-(DeHex-)HexNAc+Hex3
					9312	9309	951.111	950.777	3	2849.31	77.42	695.86	NNVITLNITGK	-	No	0	0.92	21.75	28.23	0	TRUE	7.54	5-4-0-0-0	1-0-0-0-0	HexNAc-Hex-(Hex-HexNAc-Hex-)Hex-HexNAc-HexNAc+Hex1	HexNAc-Hex-(HexNAc-(Hex-)Hex-)Hex-HexNAc-HexNAc+Hex1	HexNAc-(Hex-HexNAc-)Hex-(Hex-)Hex-HexNAc-HexNAc+Hex1
					9387	9386	1146.17	1145.5	3	3433.48	78.26	643.089	IVSPEPGGAVGPNLTCR	-	No	0	0.86	6.97	12.85	0	TRUE	1.35	3-5-0-1-0	0-1-0-0-0	NeuAc-Hex-HexNAc-Hex-(Hex-)Hex-HexNAc-HexNAc+HexNAc1
					9398	9397	1142.85	1142.51	3	3424.5	78.38	1003.44	LSALDNLLNHSSMFLK	-	No	0	0.98	41.09	5.02	-2	TRUE	8.27	4-5-0-0-0	1-1-0-0-0	HexNAc-(Hex-)Hex-(Hex-)Hex-HexNAc-HexNAc+Hex1HexNAc1	Hex-HexNAc-Hex-(Hex-)Hex-HexNAc-HexNAc+Hex1HexNAc1	HexNAc-Hex-(Hex-Hex-)Hex-HexNAc-HexNAc+Hex1HexNAc1
					9409	9408	1075.5	1074.99	4	4295.94	78.5	811.644	VADPVDSSNLDTCGSISQVIEQLPQPNR	-	No	0	0.81	16.76	6.2	0	TRUE	0.45	3-4-0-0-0	0-1-0-0-0	HexNAc-Hex-(Hex-)Hex-HexNAc-HexNAc+HexNAc1	Hex-(HexNAc-Hex-)Hex-HexNAc-HexNAc+HexNAc1
					9411	9408	1155.83	1155.83	3	3464.48	78.53	658.99	SAFDPPDIPVCLLGNR	-	No	1	0.56	50.01	37.54	-3	TRUE	3.38	3-4-1-1-0	1-0-1-1-0	Hex-Hex-(Hex-)Hex-HexNAc-HexNAc+Hex1DeHex1NeuAc1	Hex-(Hex-Hex-)Hex-HexNAc-HexNAc+Hex1DeHex1NeuAc1
					9448	9441	1105.13	1104.8	3	3311.37	78.93	907.225	DASSFLAEWQNITK	-	No	1	0.66	210.09	87.5	0	TRUE	2.95	2-8-0-0-0	0-1-0-0-0	Hex-Hex-Hex-Hex-Hex-(Hex-)Hex-HexNAc-HexNAc+HexNAc1	Hex-Hex-Hex-Hex-(Hex-Hex-)Hex-HexNAc-HexNAc+HexNAc1	Hex-Hex-Hex-(Hex-Hex-Hex-)Hex-HexNAc-HexNAc+HexNAc1
					9503	9496	849.731	849.394	3	2545.16	79.6	855.953	YDLPASINFILNK	-	No	0	1	113.42	0	-1	TRUE	10.36	2-3-1-0-0	0-0-1-0-0	Hex-(Hex-)Hex-HexNAc-HexNAc+DeHex1
					9547	9540	1236.52	1236.19	3	3705.54	80.14	998.492	NMTFDLPSDATVVLNR	-	No	1	0.52	31.43	151.29	0	TRUE	7.91	4-5-0-1-0	1-0-0-0-0	NeuAc-Hex-HexNAc-(Hex-)Hex-(Hex-)Hex-HexNAc-HexNAc+Hex1	NeuAc-Hex-HexNAc-Hex-(Hex-Hex-)Hex-HexNAc-HexNAc+Hex1
					9549	9540	952.443	951.774	3	2852.3	80.17	605.289	ANTTQPGIVEGGQVLK	-	No	0	0.91	16.44	27.86	0	TRUE	7.96	3-3-1-0-0	0-0-1-0-0	HexNAc-Hex-(Hex-)Hex-HexNAc-HexNAc+DeHex1	Hex-(HexNAc-Hex-)Hex-HexNAc-HexNAc+DeHex1
					9618	9617	1121.48	1120.82	3	3359.43	81.01	934.97	DNATEEEILVYLEK	-	No	1	0.65	96.95	30.09	0	TRUE	2.91	3-4-1-1-0	0-0-0-1-0	HexNAc-Hex-(Hex-Hex-)Hex-HexNAc-(DeHex-)HexNAc+NeuAc1	Hex-HexNAc-Hex-(Hex-)Hex-HexNAc-(DeHex-)HexNAc+NeuAc1	HexNAc-(Hex-)Hex-(Hex-)Hex-HexNAc-(DeHex-)HexNAc+NeuAc1
					9657	9650	1096.47	1096.13	3	3285.37	81.52	663.644	TLNQSETAIQPSWYF	-	No	0	0.98	6.06	0	-3	TRUE	10.33	5-3-0-0-0	3-0-0-0-0	Hex-(Hex-)Hex-HexNAc-HexNAc+Hex3
					9739	9736	972.196	971.949	4	3883.77	82.56	847.431	ILAPAYFILGGNQSGEGCVITR	-	No	1	0.56	34.48	5.57	0	TRUE	3.71	3-4-0-1-0	0-0-0-1-0	Hex-Hex-(HexNAc-Hex-)Hex-HexNAc-HexNAc+NeuAc1
					9765	9758	1086.08	1085.75	3	3254.23	82.85	878.268	YEQGTGCWQGPNR	-	No	1	0.94	93.36	28.51	0	TRUE	1.58	2-8-0-0-0	0-1-0-0-0	Hex-Hex-Hex-Hex-Hex-(Hex-)Hex-HexNAc-HexNAc+HexNAc1	Hex-Hex-Hex-Hex-(Hex-Hex-)Hex-HexNAc-HexNAc+HexNAc1	Hex-Hex-Hex-(Hex-Hex-Hex-)Hex-HexNAc-HexNAc+HexNAc1
					9796	9791	1307.92	1307.59	3	3919.75	83.21	961.802	GTEVNTTVIGENDPIDEVQGFLFGK	-	No	0	0.99	49.23	0	0	TRUE	4.98	3-3-1-0-0	1-0-0-0-0	Hex-(Hex-)Hex-HexNAc-(DeHex-)HexNAc+Hex1
					9807	9802	1155.72	1155.22	4	4616.85	83.36	895.98	SCGECIQAGPNCGWCTNSTFLQEGMPTSAR	-	No	0	0.61	27.53	19.96	0	TRUE	1.8	3-3-1-0-0	0-0-1-0-0	HexNAc-Hex-(Hex-)Hex-HexNAc-HexNAc+DeHex1	Hex-(HexNAc-Hex-)Hex-HexNAc-HexNAc+DeHex1
					9882	9879	1170.95	1170.71	4	4678.82	84.21	669.293	TAVNCSSDFDACLITK	-	No	0	0.69	4.65	68.03	-2	TRUE	1.25	5-7-1-2-0	0-0-0-2-0	Hex-HexNAc-Hex-Hex-Hex-(HexNAc-Hex-HexNAc-Hex-)Hex-HexNAc-(DeHex-)HexNAc+NeuAc2	HexNAc-Hex-Hex-(Hex-)Hex-(HexNAc-Hex-HexNAc-Hex-)Hex-HexNAc-(DeHex-)HexNAc+NeuAc2	HexNAc-Hex-Hex-Hex-(HexNAc-Hex-HexNAc-(Hex-)Hex-)Hex-HexNAc-(DeHex-)HexNAc+NeuAc2	HexNAc-Hex-Hex-Hex-(Hex-HexNAc-Hex-HexNAc-Hex-)Hex-HexNAc-(DeHex-)HexNAc+NeuAc2	Hex-HexNAc-Hex-HexNAc-Hex-(HexNAc-Hex-Hex-Hex-)Hex-HexNAc-(DeHex-)HexNAc+NeuAc2	HexNAc-Hex-HexNAc-(Hex-)Hex-(HexNAc-Hex-Hex-Hex-)Hex-HexNAc-(DeHex-)HexNAc+NeuAc2	HexNAc-Hex-HexNAc-Hex-(Hex-HexNAc-Hex-Hex-Hex-)Hex-HexNAc-(DeHex-)HexNAc+NeuAc2	HexNAc-Hex-HexNAc-Hex-(HexNAc-Hex-Hex-(Hex-)Hex-)Hex-HexNAc-(DeHex-)HexNAc+NeuAc2
					9926	9923	1464.98	1464.66	3	4390.97	84.71	1465.69	TDDEVVQREEEAIQLDGLNASQIR	-	No	0	0.93	25.81	6.41	-2	TRUE	4.89	5-4-0-0-0	2-0-0-0-0	HexNAc-(Hex-)Hex-(Hex-)Hex-HexNAc-HexNAc+Hex2	Hex-HexNAc-Hex-(Hex-)Hex-HexNAc-HexNAc+Hex2	HexNAc-Hex-(Hex-Hex-)Hex-HexNAc-HexNAc+Hex2
					9943	9934	1108.98	1108.48	4	4429.9	84.89	721.603	GTEVNTTVIGENDPIDEVQGFLFGK	-	No	0	0.87	15.69	42.37	0	TRUE	9.26	4-4-0-1-0	0-0-0-1-0	Hex-(HexNAc-)Hex-(HexNAc-Hex-)Hex-HexNAc-HexNAc+NeuAc1	Hex-Hex-(HexNAc-(HexNAc-)Hex-)Hex-HexNAc-HexNAc+NeuAc1
					9957	9956	1099.24	1098.74	4	4390.93	85.03	807.473	IGPGEPLELLCNVSGALPPAGR	-	No	1	0.86	88.52	33.78	-2	TRUE	9.23	6-5-1-0-0	2-0-0-0-0	Hex-(Hex-HexNAc-)Hex-(HexNAc-Hex-)Hex-HexNAc-(DeHex-)HexNAc+Hex2	Hex-Hex-(HexNAc-)Hex-(HexNAc-Hex-)Hex-HexNAc-(DeHex-)HexNAc+Hex2	Hex-(HexNAc-)Hex-(HexNAc-(Hex-)Hex-)Hex-HexNAc-(DeHex-)HexNAc+Hex2	HexNAc-(HexNAc-)Hex-(Hex-(Hex-)Hex-)Hex-HexNAc-(DeHex-)HexNAc+Hex2	Hex-HexNAc-(HexNAc-)Hex-(Hex-Hex-)Hex-HexNAc-(DeHex-)HexNAc+Hex2	HexNAc-(Hex-HexNAc-)Hex-(Hex-Hex-)Hex-HexNAc-(DeHex-)HexNAc+Hex2	HexNAc-(HexNAc-)Hex-(Hex-Hex-Hex-)Hex-HexNAc-(DeHex-)HexNAc+Hex2	Hex-(HexNAc-)Hex-(Hex-HexNAc-Hex-)Hex-HexNAc-(DeHex-)HexNAc+Hex2
					9959	9956	1180.04	1179.8	4	4715.15	85.04	807.163	DGNASGTTLLEALDCILPPTRPTDKPLR	-	No	0	0.58	8.53	58.13	0	TRUE	1.66	3-4-1-1-0	0-0-0-1-0	HexNAc-Hex-(Hex-Hex-)Hex-HexNAc-(DeHex-)HexNAc+NeuAc1	Hex-HexNAc-Hex-(Hex-)Hex-HexNAc-(DeHex-)HexNAc+NeuAc1	HexNAc-(Hex-)Hex-(Hex-)Hex-HexNAc-(DeHex-)HexNAc+NeuAc1
					9976	9967	1139.82	1139.49	3	3415.45	85.22	612.616	DLGPTLANSTHHNVR	-	No	1	0.94	26.42	129	0	TRUE	2.64	4-6-0-0-0	0-1-0-0-0	HexNAc-Hex-Hex-Hex-(HexNAc-Hex-)Hex-HexNAc-HexNAc+HexNAc1
					9994	9989	1228.06	1227.8	4	4907.16	85.42	1188.5	VVRPDSELGERPPEDNQSFQYDHEAFLGK	-	No	1	0.98	82.55	64.86	0	TRUE	3.68	3-4-0-1-0	0-0-0-1-0	Hex-Hex-(HexNAc-Hex-)Hex-HexNAc-HexNAc+NeuAc1
					10009	10000	1127.01	1127.01	4	4504	85.6	721.603	GTEVNTTVIGENDPIDEVQGFLFGK	-	No	0	0.54	25.85	36.79	-3	TRUE	5.1	5-5-0-0-0	2-1-0-0-0	Hex-Hex-(HexNAc-Hex-)Hex-HexNAc-HexNAc+Hex2HexNAc1
					10258	10251	1213.79	1213.79	3	3638.34	88.83	1074.1	GNFSTEGCGCVCEPGWK	-	No	1	0.82	40.27	25.81	0	TRUE	6.51	3-4-1-1-0	0-0-1-0-0	NeuAc-Hex-HexNAc-Hex-(Hex-)Hex-HexNAc-HexNAc+DeHex1
					10390	10383	1172.18	1171.85	3	3512.51	90.63	1148.98	NPVGLIGAENATGETDPSHSK	-	No	0	0.65	47.86	3.57	-2	TRUE	0.49	3-5-0-0-0	1-1-0-0-0	Hex-Hex-(Hex-)Hex-HexNAc-HexNAc+Hex1HexNAc1	Hex-(Hex-Hex-)Hex-HexNAc-HexNAc+Hex1HexNAc1
					10538	10537	1066.21	1065.95	4	4259.79	92.63	961.802	ITNENFVDAYENSNSTEFVSLASK	-	No	1	0.87	40.78	10.85	0	TRUE	0.23	3-6-0-0-0	0-1-0-0-0	HexNAc-Hex-Hex-Hex-(Hex-)Hex-HexNAc-HexNAc+HexNAc1	Hex-Hex-Hex-(HexNAc-Hex-)Hex-HexNAc-HexNAc+HexNAc1
					10676	10675	821.371	821.371	3	2461.09	94.52	785.614	VVNSTTGPGEHLR	-	No	0	0.51	32.1	0	0	TRUE	5.56	3-3-0-0-0	1-0-0-0-0	Hex-(Hex-)Hex-HexNAc-HexNAc+Hex1
					10732	10729	1172.17	1172.17	3	3513.5	95.31	1136.67	ANQSWEDSNTDLVPAPAVR	-	No	0	0.75	24.35	6.73	0	TRUE	6.25	4-3-1-0-0	1-0-0-0-0	DeHex-HexNAc-Hex-(Hex-)Hex-HexNAc-HexNAc+Hex1
					11145	11136	1158.48	1157.98	2	2313.94	100.7	1098.75	SFNATAER	-	No	1	0.79	73.59	5.67	-2	TRUE	7.7	3-5-0-0-0	0-2-0-0-0	HexNAc-Hex-(Hex-)Hex-HexNAc-HexNAc+HexNAc2	Hex-(HexNAc-Hex-)Hex-HexNAc-HexNAc+HexNAc2
					11174	11165	1172.53	1172.19	3	3513.54	101.06	1136.77	ANQSWEDSNTDLVPAPAVR	-	No	0	0.78	22.46	0	-2	TRUE	5.7	4-3-1-0-0	2-0-0-0-0	Hex-(Hex-)Hex-HexNAc-(DeHex-)HexNAc+Hex2
					11185	11176	1227.19	1226.86	3	3677.55	101.18	1231.92	ALAGLVYNASGSEHCYDIYR	-	No	0	0.58	13.69	2.15	0	TRUE	1.13	3-5-0-0-0	0-1-0-0-0	Hex-Hex-(HexNAc-Hex-)Hex-HexNAc-HexNAc+HexNAc1
					11916	11915	1172.18	1171.84	3	3512.5	110.84	1149.18	NPVGLIGAENATGETDPSHSK	-	No	0	0.74	53.74	0	-3	TRUE	3.2	3-5-0-0-0	1-2-0-0-0	Hex-(Hex-)Hex-HexNAc-HexNAc+Hex1HexNAc2
Partially sequenced records					279	278	759.315	758.981	3	2273.92	14.84	724.331	-	-	No	0	1	100.15	0	0	FALSE	-	2-3-1-0-0		Hex-(Hex-)Hex-HexNAc-(DeHex-)HexNAc+Hex
					281	278	678.311	678.311	2	1354.61	14.86	652.512	-	-	No	0	1	75.71	0	0	FALSE	-	2-3-0-0-0		Hex-(Hex-)Hex-HexNAc-HexNAc+Hex
					283	278	724.306	723.973	3	2168.9	14.87	342.674	-	-	No	0	1	6.93	103.48	0	FALSE	-	3-4-2-0-0		DeHex-HexNAc-Hex-(Hex-Hex-)Hex-HexNAc-(DeHex-)HexNAc+Hex	DeHex-HexNAc-(Hex-)Hex-(Hex-)Hex-HexNAc-(DeHex-)HexNAc+Hex
					285	278	941.449	941.115	3	2820.32	14.88	906.731	-	-	No	0	1	100.21	0.03	0	FALSE	-	3-3-0-0-0		Hex-(HexNAc-Hex-)Hex-HexNAc-HexNAc+Hex	HexNAc-Hex-(Hex-)Hex-HexNAc-HexNAc+Hex
					287	278	713.034	712.784	4	2847.11	14.89	660.697	-	-	No	0	1	100.89	0.27	0	FALSE	-	2-4-0-0-0		Hex-Hex-(Hex-)Hex-HexNAc-HexNAc+Hex	Hex-(Hex-Hex-)Hex-HexNAc-HexNAc+Hex
					290	289	864.058	863.391	3	2587.15	14.91	829.229	-	-	No	0	1	100.13	0	0	FALSE	-	2-3-0-0-0		Hex-(Hex-)Hex-HexNAc-HexNAc+Hex
					292	289	685.285	685.285	3	2052.83	14.93	650.639	-	-	No	0	1	106.62	0	0	FALSE	-	2-3-0-0-0		Hex-(Hex-)Hex-HexNAc-HexNAc+Hex
					296	289	829.05	828.715	3	2483.12	14.94	817.235	-	-	No	0	1	140.59	0	0	FALSE	-	2-3-1-0-0		Hex-(Hex-)Hex-HexNAc-(DeHex-)HexNAc+Hex	Hex-(Hex-)Hex-HexNAc-HexNAc+Hex
					298	289	775.381	775.046	3	2322.12	14.95	731.675	-	-	No	0	1	186.36	0	0	FALSE	-	2-3-0-0-0		Hex-(Hex-)Hex-HexNAc-HexNAc+Hex
					301	300	821.357	821.023	3	2460.05	14.97	909.434	-	-	No	0	1	100.27	0	0	FALSE	-	2-3-1-0-0		Hex-(Hex-)Hex-HexNAc-(DeHex-)HexNAc+Hex
					303	300	694.834	694.834	2	1387.65	14.99	683.714	-	-	No	0	1	176.89	0	0	FALSE	-	2-3-0-0-0		Hex-(Hex-)Hex-HexNAc-HexNAc+Hex
					305	300	783.329	783.329	2	1564.64	14.99	590.484	-	-	No	0	1	168.22	0	0	FALSE	-	2-3-0-0-0		Hex-(Hex-)Hex-HexNAc-HexNAc+Hex
					307	300	796.663	796.327	3	2385.96	15.01	761.774	-	-	No	0	1	100.39	0	0	FALSE	-	2-3-0-0-0		Hex-(Hex-)Hex-HexNAc-HexNAc+Hex
					309	300	878.058	877.724	3	2630.15	15.02	512.166	-	-	No	0	1	4.64	97.82	0	FALSE	-	4-4-2-0-0		DeHex-HexNAc-Hex-(Hex-(DeHex-HexNAc-)Hex-)Hex-HexNAc-HexNAc+Hex
					314	311	658.809	658.558	4	2630.2	15.05	742.837	-	-	No	0	1	114.33	0	0	FALSE	-	2-3-1-0-0		Hex-(Hex-)Hex-HexNAc-(DeHex-)HexNAc+Hex	Hex-(Hex-)Hex-HexNAc-HexNAc+Hex
					316	311	714.648	713.984	3	2138.93	15.06	679.533	-	-	No	0	1	101.55	0	0	FALSE	-	2-3-1-0-0		Hex-(Hex-)Hex-HexNAc-(DeHex-)HexNAc+Hex
					318	311	890.714	890.381	3	2668.12	15.07	504.696	-	-	No	0	1	0.5	100.24	0	FALSE	-	3-4-0-0-0		HexNAc-(Hex-)Hex-(Hex-)Hex-HexNAc-HexNAc+Hex	Hex-HexNAc-Hex-(Hex-)Hex-HexNAc-HexNAc+Hex	HexNAc-Hex-(Hex-Hex-)Hex-HexNAc-HexNAc+Hex
					323	322	1048.95	1048.45	2	2094.89	15.1	892.528	-	-	No	0	1	91.65	0	0	FALSE	-	2-3-0-0-0		Hex-(Hex-)Hex-HexNAc-HexNAc+Hex
					325	322	738.665	738.331	3	2211.97	15.11	497.315	-	-	No	0	1	122.66	0	0	FALSE	-	2-3-0-0-0		Hex-(Hex-)Hex-HexNAc-HexNAc+Hex	Hex-(Hex-)Hex-HexNAc-(DeHex-)HexNAc+Hex
					327	322	986.444	986.444	2	1970.87	15.12	877.567	-	-	No	0	1	109.69	0	0	FALSE	-	2-3-0-0-0		Hex-(Hex-)Hex-HexNAc-HexNAc+Hex
					331	322	794.357	794.357	2	1586.7	15.14	640.33	-	-	No	0	1	32.98	0	0	FALSE	-	2-3-0-0-0		Hex-(Hex-)Hex-HexNAc-HexNAc+Hex
					336	333	851.831	851.831	2	1701.65	15.17	625.309	-	-	No	0	1	106.73	0	0	FALSE	-	2-3-0-0-0		Hex-(Hex-)Hex-HexNAc-HexNAc+Hex	Hex-(Hex-)Hex-HexNAc-(DeHex-)HexNAc+Hex
					338	333	756.852	756.852	2	1511.69	15.18	516.237	-	-	No	0	1	103.74	0	0	FALSE	-	2-3-0-0-0		Hex-(Hex-)Hex-HexNAc-HexNAc+Hex
					340	333	1084.97	1084.47	2	2166.93	15.19	892.517	-	-	No	0	1	85.69	0	0	FALSE	-	2-3-0-0-0		Hex-(Hex-)Hex-HexNAc-HexNAc+Hex
					342	333	753.684	753.351	3	2257.03	15.2	672.056	-	-	No	0	1	114.54	0	0	FALSE	-	2-3-0-0-0		Hex-(Hex-)Hex-HexNAc-HexNAc+Hex
					345	344	763.338	763.338	2	1524.66	15.22	626.046	-	-	No	0	1	106.35	0	0	FALSE	-	2-3-0-0-0		Hex-(Hex-)Hex-HexNAc-HexNAc+Hex	Hex-(Hex-)Hex-HexNAc-(DeHex-)HexNAc+Hex
					347	344	921.928	921.928	2	1841.84	15.23	504.696	-	-	No	0	1	100.3	0	0	FALSE	-	2-3-0-0-0		Hex-(Hex-)Hex-HexNAc-HexNAc+Hex
					349	344	785.356	785.021	3	2352.04	15.24	832.745	-	-	No	0	0.99	175.77	0	0	FALSE	-	2-3-0-0-0		Hex-(Hex-)Hex-HexNAc-HexNAc+Hex
					351	344	660.622	660.622	3	1978.84	15.25	730.712	-	-	No	0	1	139.21	0	0	FALSE	-	2-3-0-0-0		Hex-(Hex-)Hex-HexNAc-HexNAc+Hex
					353	344	655.53	655.279	4	2617.09	15.26	346.913	-	-	No	0	1	3.96	103.6	0	FALSE	-	2-7-0-0-0		Hex-Hex-Hex-(Hex-Hex-Hex-)Hex-HexNAc-HexNAc+Hex	Hex-Hex-Hex-Hex-(Hex-Hex-)Hex-HexNAc-HexNAc+Hex	Hex-Hex-Hex-Hex-Hex-(Hex-)Hex-HexNAc-HexNAc+Hex
					356	355	665.768	665.517	4	2658.04	15.27	464.947	-	-	No	0	1	102.56	0	0	FALSE	-	2-3-0-0-0		Hex-(Hex-)Hex-HexNAc-HexNAc+Hex
					358	355	887.41	887.41	2	1772.81	15.29	680.856	-	-	No	0	1	41.4	0	0	FALSE	-	2-3-0-0-0		Hex-(Hex-)Hex-HexNAc-HexNAc+Hex
					362	355	804.023	803.688	3	2408.04	15.31	731.688	-	-	No	0	1	237.38	0	0	FALSE	-	2-3-0-0-0		Hex-(Hex-)Hex-HexNAc-HexNAc+Hex
					364	355	822.88	822.88	2	1643.74	15.32	1042.56	-	-	No	0	1	106.48	0	0	FALSE	-	2-3-0-0-0		Hex-(Hex-)Hex-HexNAc-HexNAc+Hex
					367	366	1120.49	1119.99	2	2237.97	15.33	892.511	-	-	No	0	1	126.78	0	0	FALSE	-	2-3-0-0-0		Hex-(Hex-)Hex-HexNAc-HexNAc+Hex
					369	366	703.325	703.325	2	1404.64	15.35	680.856	-	-	No	0	1	102.92	0	0	FALSE	-	2-3-0-0-0		Hex-(Hex-)Hex-HexNAc-HexNAc+Hex
					371	366	963.74	963.406	3	2887.2	15.36	600.633	-	-	No	0	1	34.45	218.4	0	FALSE	-	3-5-1-0-0		Hex-Hex-(Hex-HexNAc-Hex-)Hex-HexNAc-(DeHex-)HexNAc+Hex	Hex-(Hex-)Hex-(HexNAc-Hex-)Hex-HexNAc-(DeHex-)HexNAc+Hex	Hex-Hex-Hex-(HexNAc-Hex-)Hex-HexNAc-(DeHex-)HexNAc+Hex	Hex-Hex-(HexNAc-(Hex-)Hex-)Hex-HexNAc-(DeHex-)HexNAc+Hex
					373	366	772.413	772.413	2	1542.81	15.37	940.614	-	-	No	0	1	102.32	0	0	FALSE	-	2-3-0-0-0		Hex-(Hex-)Hex-HexNAc-HexNAc+Hex
					375	366	733.866	733.866	2	1465.72	15.38	612.543	-	-	No	0	1	105.71	0	0	FALSE	-	2-3-0-0-0		Hex-(Hex-)Hex-HexNAc-HexNAc+Hex
					378	377	1066.45	1065.95	2	2129.88	15.39	1048.33	-	-	No	0	1	102.34	0	0	FALSE	-	2-3-0-0-0		Hex-(Hex-)Hex-HexNAc-HexNAc+Hex
					380	377	1076.94	1076.94	2	2151.86	15.41	612.636	-	-	No	0	1	6.64	100	0	FALSE	-	3-3-0-0-0		HexNAc-Hex-(Hex-)Hex-HexNAc-HexNAc+Hex	Hex-(HexNAc-Hex-)Hex-HexNAc-HexNAc+Hex
					382	377	711.3	710.967	3	2129.88	15.42	597.948	-	-	No	0	1	106.62	0.41	0	FALSE	-	2-4-0-0-0		Hex-(Hex-Hex-)Hex-HexNAc-HexNAc+Hex	Hex-Hex-(Hex-)Hex-HexNAc-HexNAc+Hex
					384	377	691.243	691.243	3	2070.71	15.43	747.618	-	-	No	0	1	102	0	0	FALSE	-	2-3-0-0-0		Hex-(Hex-)Hex-HexNAc-HexNAc+Hex
					393	388	981.849	981.849	2	1961.68	15.48	928.887	-	-	No	0	1	144.96	0	0	FALSE	-	2-3-0-0-0		Hex-(Hex-)Hex-HexNAc-HexNAc+Hex	Hex-(Hex-)Hex-HexNAc-(DeHex-)HexNAc+Hex
					400	399	771.016	770.682	3	2309.02	15.52	275.629	-	-	No	0	1	8.25	100	0	FALSE	-	2-4-0-0-0		Hex-Hex-(Hex-)Hex-HexNAc-HexNAc+Hex	Hex-(Hex-Hex-)Hex-HexNAc-HexNAc+Hex
					402	399	1156.01	1155.51	2	2309.01	15.53	954.997	-	-	No	0	1	123.72	0	0	FALSE	-	2-3-0-0-0		Hex-(Hex-)Hex-HexNAc-HexNAc+Hex	Hex-(Hex-)Hex-HexNAc-(DeHex-)HexNAc+Hex
					406	399	672.785	672.29	2	1342.57	15.55	455.221	-	-	No	0	1	117.51	0	0	FALSE	-	2-3-0-0-0		Hex-(Hex-)Hex-HexNAc-HexNAc+Hex
					408	399	813.333	813.333	2	1624.65	15.56	693.376	-	-	No	0	1	113.16	0	0	FALSE	-	2-3-0-0-0		Hex-(Hex-)Hex-HexNAc-HexNAc+Hex
					415	410	808.746	808.415	3	2422.22	15.6	652.856	-	-	No	0	1	100.4	0	0	FALSE	-	2-3-1-0-0		Hex-(Hex-)Hex-HexNAc-(DeHex-)HexNAc+Hex
					417	410	860.691	860.691	3	2579.05	15.61	838.177	-	-	No	0	1	202.81	0	0	FALSE	-	2-3-0-0-0		Hex-(Hex-)Hex-HexNAc-HexNAc+Hex
					419	410	697.289	696.955	3	2087.84	15.62	560.737	-	-	No	0	1	105.99	0	0	FALSE	-	2-3-1-0-0		Hex-(Hex-)Hex-HexNAc-(DeHex-)HexNAc+Hex	Hex-(Hex-)Hex-HexNAc-HexNAc+Hex
					426	421	676.332	676.332	2	1350.65	15.66	394.517	-	-	No	0	1	108.35	0	0	FALSE	-	2-3-0-0-0		Hex-(Hex-)Hex-HexNAc-HexNAc+Hex
					430	421	688.968	688.636	3	2062.89	15.68	769.167	-	-	No	0	1	157.41	0	0	FALSE	-	2-3-0-0-0		Hex-(Hex-)Hex-HexNAc-HexNAc+Hex
					433	432	743.844	743.844	2	1485.67	15.7	606.255	-	-	No	0	1	120.9	0	0	FALSE	-	2-3-1-0-0		Hex-(Hex-)Hex-HexNAc-(DeHex-)HexNAc+Hex	Hex-(Hex-)Hex-HexNAc-HexNAc+Hex
					435	432	905.412	905.412	2	1808.81	15.72	751.844	-	-	No	0	1	12.02	0	0	FALSE	-	2-3-0-0-0		Hex-(Hex-)Hex-HexNAc-HexNAc+Hex
					437	432	682.972	682.637	3	2044.89	15.73	760.162	-	-	No	0	1	126.44	0	0	FALSE	-	2-3-0-0-0		Hex-(Hex-)Hex-HexNAc-HexNAc+Hex
					439	432	709.325	708.989	3	2123.94	15.74	683.543	-	-	No	0	1	105.45	0	0	FALSE	-	2-3-0-0-0		Hex-(Hex-)Hex-HexNAc-HexNAc+Hex
					444	443	895.421	895.421	2	1788.83	15.77	592.276	-	-	No	0	1	141.69	0	0	FALSE	-	2-3-0-0-0		Hex-(Hex-)Hex-HexNAc-HexNAc+Hex
					446	443	871.375	870.706	3	2609.1	15.78	537.908	-	-	No	0	1	4.44	108.34	0	FALSE	-	3-3-1-0-0		DeHex-HexNAc-Hex-(Hex-)Hex-HexNAc-HexNAc+Hex
					448	443	932.871	932.871	2	1863.73	15.79	690.414	-	-	No	0	1	73.7	0	0	FALSE	-	2-3-0-0-0		Hex-(Hex-)Hex-HexNAc-HexNAc+Hex
					450	443	1025.75	1025.08	3	3072.2	15.8	787.738	-	-	No	1	1	184.86	52.61	-1	TRUE	-	2-8-0-0-0	0-1-0-0-0	Hex-Hex-Hex-Hex-Hex-(Hex-)Hex-HexNAc-HexNAc+HexNAc1	Hex-Hex-Hex-Hex-(Hex-Hex-)Hex-HexNAc-HexNAc+HexNAc1	Hex-Hex-Hex-(Hex-Hex-Hex-)Hex-HexNAc-HexNAc+HexNAc1
					452	443	729.366	729.366	2	1456.72	15.81	694.386	-	-	No	0	1	92.69	0	0	FALSE	-	2-3-0-0-0		Hex-(Hex-)Hex-HexNAc-HexNAc+Hex
					455	454	766.351	766.351	2	1530.69	15.83	706.421	-	-	No	0	1	112.16	0	0	FALSE	-	2-3-0-0-0		Hex-(Hex-)Hex-HexNAc-HexNAc+Hex
					457	454	799.397	799.397	3	2395.17	15.85	504.696	-	-	No	0	1	106.1	0	0	FALSE	-	2-3-0-0-0		Hex-(Hex-)Hex-HexNAc-HexNAc+Hex
					459	454	826.919	826.919	2	1651.82	15.86	671.784	-	-	No	0	1	87.11	0	0	FALSE	-	2-3-0-0-0		Hex-(Hex-)Hex-HexNAc-HexNAc+Hex
					461	454	1327.54	1326.87	3	3977.57	15.87	1206.94	-	-	No	0	1	41.66	135.75	0	FALSE	-	3-5-2-0-0		Hex-Hex-Hex-(DeHex-HexNAc-Hex-)Hex-HexNAc-(DeHex-)HexNAc+Hex	Hex-(DeHex-)HexNAc-(Hex-)Hex-(Hex-)Hex-HexNAc-(DeHex-)HexNAc+Hex	Hex-Hex-(DeHex-HexNAc-)Hex-(Hex-)Hex-HexNAc-(DeHex-)HexNAc+Hex	Hex-(Hex-)Hex-(DeHex-HexNAc-Hex-)Hex-HexNAc-(DeHex-)HexNAc+Hex	Hex-(DeHex-)HexNAc-Hex-(Hex-Hex-)Hex-HexNAc-(DeHex-)HexNAc+Hex	DeHex-HexNAc-(Hex-)Hex-(Hex-Hex-)Hex-HexNAc-(DeHex-)HexNAc+Hex
					463	454	705.36	705.36	2	1408.7	15.88	669.749	-	-	No	0	1	108.06	0	0	FALSE	-	2-3-0-0-0		Hex-(Hex-)Hex-HexNAc-HexNAc+Hex
					466	465	736.335	736.335	2	1470.65	15.9	600.633	-	-	No	0	1	43.15	0	0	FALSE	-	2-3-0-0-0		Hex-(Hex-)Hex-HexNAc-HexNAc+Hex
					468	465	880.384	880.384	2	1758.75	15.92	768.282	-	-	No	0	1	109.15	0	0	FALSE	-	2-3-0-0-0		Hex-(Hex-)Hex-HexNAc-HexNAc+Hex	Hex-(Hex-)Hex-HexNAc-(DeHex-)HexNAc+Hex
					470	465	969.396	969.396	2	1936.78	15.93	573.265	-	-	No	0	1	49.57	0	0	FALSE	-	2-3-0-0-0		Hex-(Hex-)Hex-HexNAc-HexNAc+Hex
					472	465	789.866	789.866	2	1577.72	15.95	735.729	-	-	No	0	1	125.11	0	0	FALSE	-	2-3-0-0-0		Hex-(Hex-)Hex-HexNAc-HexNAc+Hex
					474	465	787.337	787.337	3	2358.99	15.96	576.856	-	-	No	0	1	120.35	0	0	FALSE	-	2-3-1-0-0		Hex-(Hex-)Hex-HexNAc-(DeHex-)HexNAc+Hex
					477	476	1191.53	1191.03	2	2380.04	15.98	909.434	-	-	No	0	1	113.54	0	0	FALSE	-	2-3-1-0-0		Hex-(Hex-)Hex-HexNAc-(DeHex-)HexNAc+Hex	Hex-(Hex-)Hex-HexNAc-HexNAc+Hex
					483	476	824.418	824.418	2	1646.82	16.02	909.434	-	-	No	0	1	107.63	0	0	FALSE	-	2-3-0-0-0		Hex-(Hex-)Hex-HexNAc-HexNAc+Hex
					485	476	817.365	817.032	3	2448.07	16.03	661.308	-	-	No	0	1	101.13	0	0	FALSE	-	2-3-0-0-0		Hex-(Hex-)Hex-HexNAc-HexNAc+Hex	Hex-(Hex-)Hex-HexNAc-(DeHex-)HexNAc+Hex
					488	487	752.075	751.827	4	3003.28	16.05	727.859	-	-	No	0	1	101.67	0	0	FALSE	-	2-3-0-0-0		Hex-(Hex-)Hex-HexNAc-HexNAc+Hex	Hex-(Hex-)Hex-HexNAc-(DeHex-)HexNAc+Hex
					490	487	918.115	917.781	3	2750.32	16.06	637	-	-	No	0	1	105.04	0	0	FALSE	-	2-3-1-0-0		Hex-(Hex-)Hex-HexNAc-(DeHex-)HexNAc+Hex	Hex-(Hex-)Hex-HexNAc-HexNAc+Hex
					492	487	1202.53	1202.02	2	2402.02	16.07	892.425	-	-	No	0	1	94.05	0	0	FALSE	-	2-3-1-0-0		Hex-(Hex-)Hex-HexNAc-(DeHex-)HexNAc+Hex	Hex-(Hex-)Hex-HexNAc-HexNAc+Hex
					494	487	960.677	960.677	2	1919.34	16.09	929.981	-	-	No	0	1	102.08	0	0	FALSE	-	2-3-0-0-0		Hex-(Hex-)Hex-HexNAc-HexNAc+Hex
					496	487	900.719	900.384	3	2698.13	16.1	681.647	-	-	No	0	1	250.94	200.45	-1	TRUE	-	2-7-0-0-0	0-1-0-0-0	Hex-Hex-Hex-Hex-(Hex-)Hex-HexNAc-HexNAc+HexNAc1	Hex-Hex-Hex-(Hex-Hex-)Hex-HexNAc-HexNAc+HexNAc1	Hex-Hex-(Hex-Hex-Hex-)Hex-HexNAc-HexNAc+HexNAc1
					499	498	1051.16	1050.83	3	3149.46	16.12	1373.08	-	-	No	0	1	141.95	0	0	FALSE	-	2-3-0-0-0		Hex-(Hex-)Hex-HexNAc-HexNAc+Hex
					501	498	854.879	854.879	2	1707.74	16.14	802.623	-	-	No	0	1	100.81	0	0	FALSE	-	2-3-0-0-0		Hex-(Hex-)Hex-HexNAc-HexNAc+Hex
					503	498	680.623	680.285	3	2037.83	16.15	440.468	-	-	No	0	1	128.75	0	0	FALSE	-	2-3-1-0-0		Hex-(Hex-)Hex-HexNAc-(DeHex-)HexNAc+Hex	Hex-(Hex-)Hex-HexNAc-HexNAc+Hex
					505	498	945.424	945.424	2	1888.83	16.16	928.167	-	-	No	0	1	105.5	0	0	FALSE	-	2-3-0-0-0		Hex-(Hex-)Hex-HexNAc-HexNAc+Hex
					507	498	652.849	652.351	2	1302.69	16.17	667.455	-	-	No	0	1	104.39	0	0	FALSE	-	2-3-0-0-0		Hex-(Hex-)Hex-HexNAc-HexNAc+Hex
					510	509	1315.06	1314.56	2	2627.1	16.2	696.614	-	-	No	0	1	4.23	91.8	0	FALSE	-	3-4-1-0-0		Hex-HexNAc-Hex-(Hex-)Hex-HexNAc-(DeHex-)HexNAc+Hex	HexNAc-(Hex-)Hex-(Hex-)Hex-HexNAc-(DeHex-)HexNAc+Hex	HexNAc-Hex-(Hex-Hex-)Hex-HexNAc-(DeHex-)HexNAc+Hex
					512	509	1006.97	1006.97	2	2011.93	16.21	1123.69	-	-	No	0	1	108.11	0	0	FALSE	-	2-3-0-0-0		Hex-(Hex-)Hex-HexNAc-HexNAc+Hex	Hex-(Hex-)Hex-HexNAc-(DeHex-)HexNAc+Hex
					514	509	915.849	915.849	2	1829.68	16.22	681.84	-	-	No	0	1	6.98	0	0	FALSE	-	2-3-0-0-0		Hex-(Hex-)Hex-HexNAc-HexNAc+Hex
					518	509	1073.73	1073.39	3	3217.14	16.25	1008.25	-	-	No	0	1	150.8	0	0	FALSE	-	2-3-0-0-0		Hex-(Hex-)Hex-HexNAc-HexNAc+Hex	Hex-(Hex-)Hex-HexNAc-(DeHex-)HexNAc+Hex
					521	520	884.373	884.037	3	2649.09	16.27	738.691	-	-	No	0	1	112.81	15.69	0	FALSE	-	2-5-0-0-0		Hex-Hex-Hex-(Hex-)Hex-HexNAc-HexNAc+Hex	Hex-Hex-(Hex-Hex-)Hex-HexNAc-HexNAc+Hex
					523	520	1211.05	1210.55	2	2419.08	16.29	594.287	-	-	No	0	1	102.21	0	0	FALSE	-	2-3-0-0-0		Hex-(Hex-)Hex-HexNAc-HexNAc+Hex
					525	520	945.421	945.421	2	1888.83	16.3	928.678	-	-	No	0	1	91.66	0	0	FALSE	-	2-3-0-0-0		Hex-(Hex-)Hex-HexNAc-HexNAc+Hex
					532	531	908.955	908.955	2	1815.9	16.35	668.458	-	-	No	0	1	112.83	0	0	FALSE	-	2-3-0-0-0		Hex-(Hex-)Hex-HexNAc-HexNAc+Hex	Hex-(Hex-)Hex-HexNAc-(DeHex-)HexNAc+Hex
					534	531	819.371	818.869	2	1635.72	16.36	766.732	-	-	No	0	1	100.3	0	0	FALSE	-	2-3-0-0-0		Hex-(Hex-)Hex-HexNAc-HexNAc+Hex
					536	531	1005.44	1004.94	2	2007.86	16.37	373.242	-	-	No	0	1	155	10.5	0	FALSE	-	2-4-0-0-0		Hex-(Hex-Hex-)Hex-HexNAc-HexNAc+Hex	Hex-Hex-(Hex-)Hex-HexNAc-HexNAc+Hex
					538	531	973.407	972.413	2	1942.81	16.38	920.405	-	-	No	0	1	101.62	0.13	0	FALSE	-	2-5-0-0-0		Hex-Hex-(Hex-Hex-)Hex-HexNAc-HexNAc+Hex	Hex-Hex-Hex-(Hex-)Hex-HexNAc-HexNAc+Hex
					540	531	811.392	811.392	2	1620.77	16.4	610.589	-	-	No	0	1	117.93	0	0	FALSE	-	2-3-0-0-0		Hex-(Hex-)Hex-HexNAc-HexNAc+Hex
					543	542	668.648	668.311	3	2001.91	16.42	439.936	-	-	No	0	1	113.23	0	0	FALSE	-	2-3-1-0-0		Hex-(Hex-)Hex-HexNAc-(DeHex-)HexNAc+Hex	Hex-(Hex-)Hex-HexNAc-HexNAc+Hex
					545	542	723.26	723.26	2	1444.51	16.43	448.885	-	-	No	0	1	135.74	0	0	FALSE	-	2-3-0-0-0		Hex-(Hex-)Hex-HexNAc-HexNAc+Hex
					547	542	749.851	748.849	2	1495.68	16.44	571.323	-	-	No	0	1	19.94	0	0	FALSE	-	2-3-0-0-0		Hex-(Hex-)Hex-HexNAc-HexNAc+Hex
					549	542	650.27	650.27	3	1947.79	16.45	677.31	-	-	No	0	1	123.37	0	0	FALSE	-	2-3-0-0-0		Hex-(Hex-)Hex-HexNAc-HexNAc+Hex
					554	553	877.043	876.709	3	2627.11	16.48	497.288	-	-	No	0	1	101.96	1.92	0	FALSE	-	3-3-0-0-0		HexNAc-Hex-(Hex-)Hex-HexNAc-HexNAc+Hex	Hex-(HexNAc-Hex-)Hex-HexNAc-HexNAc+Hex
					556	553	864.416	864.416	2	1726.82	16.5	829.217	-	-	No	0	1	111.98	0	0	FALSE	-	2-3-0-0-0		Hex-(Hex-)Hex-HexNAc-HexNAc+Hex
					558	553	1220.51	1220	2	2437.99	16.51	580.022	-	-	No	0	1	83.86	115.55	0	FALSE	-	2-5-1-0-0		Hex-Hex-(Hex-Hex-)Hex-HexNAc-(DeHex-)HexNAc+Hex	Hex-Hex-Hex-(Hex-)Hex-HexNAc-(DeHex-)HexNAc+Hex
					562	553	1001.97	1001.97	2	2001.92	16.53	1014.6	-	-	No	0	1	75.65	0	0	FALSE	-	2-3-0-0-0		Hex-(Hex-)Hex-HexNAc-HexNAc+Hex	Hex-(Hex-)Hex-HexNAc-(DeHex-)HexNAc+Hex
					565	564	715.36	715.028	3	2142.06	16.55	970.823	-	-	No	0	1	101.03	0	0	FALSE	-	2-3-0-0-0		Hex-(Hex-)Hex-HexNAc-HexNAc+Hex
					569	564	759.371	759.371	2	1516.73	16.57	611.444	-	-	No	0	1	106.03	0	0	FALSE	-	2-3-0-0-0		Hex-(Hex-)Hex-HexNAc-HexNAc+Hex
					571	564	807.37	807.37	3	2419.09	16.59	458.194	-	-	No	0	1	26.98	115.05	0	FALSE	-	2-5-0-0-0		Hex-Hex-(Hex-Hex-)Hex-HexNAc-HexNAc+Hex	Hex-Hex-Hex-(Hex-)Hex-HexNAc-HexNAc+Hex
					578	575	956.052	956.052	3	2865.13	16.63	921.505	-	-	No	0	1	102.73	0	0	FALSE	-	2-3-0-0-0		Hex-(Hex-)Hex-HexNAc-HexNAc+Hex	Hex-(Hex-)Hex-HexNAc-(DeHex-)HexNAc+Hex
					580	575	720.838	719.841	2	1437.67	16.64	707.18	-	-	No	0	1	80.29	0	0	FALSE	-	2-3-0-0-0		Hex-(Hex-)Hex-HexNAc-HexNAc+Hex
					582	575	1082.46	1082.46	2	2162.9	16.65	947.619	-	-	No	0	1	113.17	0	-3	TRUE	-	3-5-0-0-0	1-2-0-0-0	Hex-(Hex-)Hex-HexNAc-HexNAc+Hex1HexNAc2
					584	575	794.372	794.372	2	1586.73	16.66	696.614	-	-	No	0	1	109.33	0	0	FALSE	-	2-3-0-0-0		Hex-(Hex-)Hex-HexNAc-HexNAc+Hex
					589	586	755.357	754.354	2	1506.69	16.69	611.101	-	-	No	0	1	101.53	0	0	FALSE	-	2-3-0-0-0		Hex-(Hex-)Hex-HexNAc-HexNAc+Hex
					593	586	1143.5	1143.16	3	3426.45	16.72	683.849	-	-	No	0	0.83	4.5	221.45	-3	TRUE	-	5-5-3-0-0	1-1-1-0-0	Hex-(DeHex-)HexNAc-(DeHex-HexNAc-)Hex-(Hex-)Hex-HexNAc-HexNAc+Hex1HexNAc1DeHex1	Hex-(DeHex-)HexNAc-Hex-(DeHex-HexNAc-Hex-)Hex-HexNAc-HexNAc+Hex1HexNAc1DeHex1
					595	586	1139.48	1138.97	2	2275.93	16.73	580.095	-	-	No	0	1	121.3	93.45	0	FALSE	-	2-5-0-0-0		Hex-Hex-Hex-(Hex-)Hex-HexNAc-HexNAc+Hex	Hex-Hex-(Hex-Hex-)Hex-HexNAc-HexNAc+Hex
					598	597	654.858	654.858	2	1307.7	16.75	619.35	-	-	No	0	1	107.4	0	0	FALSE	-	2-3-1-0-0		Hex-(Hex-)Hex-HexNAc-(DeHex-)HexNAc+Hex	Hex-(Hex-)Hex-HexNAc-HexNAc+Hex
					602	597	661.872	661.372	2	1320.73	16.77	548.504	-	-	No	0	1	99.52	0	0	FALSE	-	2-3-0-0-0		Hex-(Hex-)Hex-HexNAc-HexNAc+Hex	Hex-(Hex-)Hex-HexNAc-(DeHex-)HexNAc+Hex
					604	597	659.628	659.628	3	1975.86	16.78	624.703	-	-	No	0	1	113.5	0	0	FALSE	-	2-3-0-0-0		Hex-(Hex-)Hex-HexNAc-HexNAc+Hex
					609	608	699.334	699.334	2	1396.65	16.81	550.25	-	-	No	0	1	104.11	0	0	FALSE	-	2-3-0-0-0		Hex-(Hex-)Hex-HexNAc-HexNAc+Hex
					611	608	687.294	686.961	3	2057.86	16.82	608.467	-	-	No	0	1	117.74	0	0	FALSE	-	2-3-0-0-0		Hex-(Hex-)Hex-HexNAc-HexNAc+Hex
					617	608	694.341	694.341	2	1386.67	16.86	681.602	-	-	No	0	1	107.9	0	0	FALSE	-	2-3-0-0-0		Hex-(Hex-)Hex-HexNAc-HexNAc+Hex
					620	619	687.295	686.962	3	2057.86	16.88	675.298	-	-	No	0	1	105.44	0	0	FALSE	-	2-3-1-0-0		Hex-(Hex-)Hex-HexNAc-(DeHex-)HexNAc+Hex
					622	619	782.345	782.345	2	1562.67	16.89	492.289	-	-	No	0	1	194.8	0	0	FALSE	-	2-3-0-0-0		Hex-(Hex-)Hex-HexNAc-HexNAc+Hex	Hex-(Hex-)Hex-HexNAc-(DeHex-)HexNAc+Hex
					626	619	705.315	705.315	2	1408.62	16.91	653.41	-	-	No	0	1	48.25	0	0	FALSE	-	2-3-0-0-0		Hex-(Hex-)Hex-HexNAc-HexNAc+Hex
					628	619	713.346	713.346	3	2137.01	16.92	478.002	-	-	No	0	1	109.42	0	-2	TRUE	-	3-3-0-1-0	1-0-0-1-0	Hex-(Hex-)Hex-HexNAc-HexNAc+Hex1NeuAc1
					631	630	710.982	710.32	3	2127.94	16.94	900.446	-	-	No	0	1	104.54	0	0	FALSE	-	2-3-0-0-0		Hex-(Hex-)Hex-HexNAc-HexNAc+Hex
					633	630	925.409	925.409	2	1848.8	16.95	784.465	-	-	No	0	1	107.1	0	0	FALSE	-	2-3-0-0-0		Hex-(Hex-)Hex-HexNAc-HexNAc+Hex
					635	630	657.302	656.967	3	1967.88	16.96	621.797	-	-	No	0	1	102.46	0	0	FALSE	-	2-3-1-0-0		Hex-(Hex-)Hex-HexNAc-(DeHex-)HexNAc+Hex	Hex-(Hex-)Hex-HexNAc-HexNAc+Hex
					642	641	1011.77	1011.43	3	3031.28	17	610.589	-	-	No	0	1	0.15	101.34	0	FALSE	-	4-3-0-0-0		HexNAc-Hex-(HexNAc-Hex-)Hex-HexNAc-HexNAc+Hex	HexNAc-(HexNAc-)Hex-(Hex-)Hex-HexNAc-HexNAc+Hex
					644	641	1347.01	1346.51	2	2691	17.02	989.5	-	-	No	0	1	118.73	0	0	FALSE	-	2-3-0-0-0		Hex-(Hex-)Hex-HexNAc-HexNAc+Hex
					648	641	1428.04	1427.53	2	2853.05	17.04	989.577	-	-	No	0	1	120.89	0	0	FALSE	-	2-3-0-0-0		Hex-(Hex-)Hex-HexNAc-HexNAc+Hex	Hex-(Hex-)Hex-HexNAc-(DeHex-)HexNAc+Hex
					653	652	671.345	671.345	2	1340.67	17.07	533.362	-	-	No	0	1	81.48	0	0	FALSE	-	2-3-0-0-0		Hex-(Hex-)Hex-HexNAc-HexNAc+Hex
					655	652	770.334	769.835	2	1537.66	17.08	761.76	-	-	No	0	1	103.78	0	0	FALSE	-	2-3-1-0-0		Hex-(Hex-)Hex-HexNAc-(DeHex-)HexNAc+Hex	Hex-(Hex-)Hex-HexNAc-HexNAc+Hex
					657	652	665.827	665.827	2	1329.64	17.09	587.153	-	-	No	0	1	105.04	0	0	FALSE	-	2-3-0-0-0		Hex-(Hex-)Hex-HexNAc-HexNAc+Hex
					661	652	814.367	814.367	3	2440.08	17.11	797.477	-	-	No	0	1	126.54	0	0	FALSE	-	2-3-1-0-0		Hex-(Hex-)Hex-HexNAc-(DeHex-)HexNAc+Hex	Hex-(Hex-)Hex-HexNAc-HexNAc+Hex
					666	663	776.343	776.343	2	1550.67	17.15	459.729	-	-	No	0	1	105.56	0	0	FALSE	-	2-3-0-0-0		Hex-(Hex-)Hex-HexNAc-HexNAc+Hex	Hex-(Hex-)Hex-HexNAc-(DeHex-)HexNAc+Hex
					672	663	1156.45	1155.65	5	5773.23	17.18	815.895	-	-	No	0	1	11.31	640.88	0	FALSE	-	3-12-1-0-0		Hex-Hex-Hex-Hex-Hex-Hex-Hex-Hex-(HexNAc-)Hex-(Hex-Hex-)Hex-HexNAc-(DeHex-)HexNAc+Hex	Hex-Hex-Hex-Hex-Hex-Hex-Hex-(HexNAc-)Hex-(Hex-(Hex-)Hex-)Hex-HexNAc-(DeHex-)HexNAc+Hex	Hex-Hex-Hex-Hex-Hex-Hex-(Hex-HexNAc-)Hex-(Hex-(Hex-)Hex-)Hex-HexNAc-(DeHex-)HexNAc+Hex	Hex-Hex-Hex-Hex-Hex-Hex-Hex-(Hex-HexNAc-)Hex-(Hex-Hex-)Hex-HexNAc-(DeHex-)HexNAc+Hex
					675	674	692.368	692.368	2	1382.72	17.2	1147.63	-	-	No	0	1	100.42	0	0	FALSE	-	2-3-0-0-0		Hex-(Hex-)Hex-HexNAc-HexNAc+Hex
					677	674	689.338	688.329	3	2061.97	17.21	885.754	-	-	No	0	1	100.23	0	0	FALSE	-	2-3-1-0-0		Hex-(Hex-)Hex-HexNAc-(DeHex-)HexNAc+Hex
					679	674	676.79	676.79	2	1351.57	17.22	624.62	-	-	No	0	1	102.1	0	0	FALSE	-	2-3-0-0-0		Hex-(Hex-)Hex-HexNAc-HexNAc+Hex
					681	674	1123.85	1123.44	5	5612.18	17.23	1070.14	-	-	No	0	1	268.82	191.98	0	FALSE	-	2-6-0-0-0		Hex-Hex-Hex-Hex-(Hex-)Hex-HexNAc-HexNAc+Hex	Hex-Hex-Hex-(Hex-Hex-)Hex-HexNAc-HexNAc+Hex	Hex-Hex-(Hex-Hex-Hex-)Hex-HexNAc-HexNAc+Hex
					683	674	719.278	719.278	2	1436.54	17.24	403.683	-	-	No	0	1	103.07	0	0	FALSE	-	2-3-0-0-0		Hex-(Hex-)Hex-HexNAc-HexNAc+Hex	Hex-(Hex-)Hex-HexNAc-(DeHex-)HexNAc+Hex
					686	685	976.087	975.755	3	2924.24	17.26	524.264	-	-	No	0	1	26.44	109.81	0	FALSE	-	4-4-0-0-0		Hex-Hex-(HexNAc-(HexNAc-)Hex-)Hex-HexNAc-HexNAc+Hex	Hex-(HexNAc-)Hex-(HexNAc-Hex-)Hex-HexNAc-HexNAc+Hex
					688	685	683.305	683.305	3	2046.89	17.27	761.234	-	-	No	0	1	143.48	0	0	FALSE	-	2-3-0-0-0		Hex-(Hex-)Hex-HexNAc-HexNAc+Hex
					690	685	764.398	764.398	2	1526.78	17.28	636.91	-	-	No	0	1	114.79	0	0	FALSE	-	2-3-1-0-0		Hex-(Hex-)Hex-HexNAc-(DeHex-)HexNAc+Hex	Hex-(Hex-)Hex-HexNAc-HexNAc+Hex
					694	685	778.398	778.398	2	1554.78	17.31	522.713	-	-	No	0	1	133.88	0	0	FALSE	-	2-3-0-0-0		Hex-(Hex-)Hex-HexNAc-HexNAc+Hex
					697	696	1091.23	1091.03	5	5450.11	17.33	684.815	-	-	No	0	1	3.57	592.89	0	FALSE	-	4-11-1-0-0		Hex-Hex-Hex-(DeHex-HexNAc-Hex-HexNAc-)Hex-(Hex-Hex-Hex-Hex-Hex-)Hex-HexNAc-HexNAc+Hex	Hex-Hex-Hex-(HexNAc-Hex-(DeHex-)HexNAc-)Hex-(Hex-Hex-Hex-(Hex-)Hex-)Hex-HexNAc-HexNAc+Hex	Hex-Hex-Hex-(HexNAc-Hex-(DeHex-)HexNAc-)Hex-(Hex-Hex-Hex-Hex-Hex-)Hex-HexNAc-HexNAc+Hex	Hex-Hex-Hex-Hex-(HexNAc-)Hex-(Hex-Hex-Hex-(Hex-(DeHex-)HexNAc-)Hex-)Hex-HexNAc-HexNAc+Hex	Hex-Hex-Hex-Hex-Hex-(HexNAc-)Hex-(Hex-Hex-(Hex-(DeHex-)HexNAc-)Hex-)Hex-HexNAc-HexNAc+Hex	Hex-Hex-Hex-(Hex-HexNAc-)Hex-(Hex-Hex-Hex-(Hex-(DeHex-)HexNAc-)Hex-)Hex-HexNAc-HexNAc+Hex	Hex-Hex-Hex-(HexNAc-Hex-(DeHex-)HexNAc-)Hex-(Hex-Hex-(Hex-Hex-)Hex-)Hex-HexNAc-HexNAc+Hex	Hex-Hex-Hex-(DeHex-HexNAc-Hex-HexNAc-)Hex-(Hex-Hex-(Hex-Hex-)Hex-)Hex-HexNAc-HexNAc+Hex	Hex-Hex-Hex-Hex-(Hex-HexNAc-)Hex-(Hex-Hex-(Hex-(DeHex-)HexNAc-)Hex-)Hex-HexNAc-HexNAc+Hex	Hex-Hex-Hex-(DeHex-HexNAc-Hex-HexNAc-)Hex-(Hex-Hex-Hex-(Hex-)Hex-)Hex-HexNAc-HexNAc+Hex
					699	696	858.891	858.891	2	1715.77	17.34	841.67	-	-	No	0	1	58.28	0	0	FALSE	-	2-3-0-0-0		Hex-(Hex-)Hex-HexNAc-HexNAc+Hex
					701	696	1161.85	1161.45	5	5802.24	17.35	915.38	-	-	No	0	1	25.53	321.35	0	FALSE	-	2-11-1-0-0		Hex-Hex-Hex-Hex-Hex-Hex-Hex-(Hex-Hex-Hex-)Hex-HexNAc-(DeHex-)HexNAc+Hex	Hex-Hex-Hex-Hex-Hex-Hex-Hex-Hex-Hex-(Hex-)Hex-HexNAc-(DeHex-)HexNAc+Hex	Hex-Hex-Hex-Hex-Hex-Hex-(Hex-Hex-Hex-Hex-)Hex-HexNAc-(DeHex-)HexNAc+Hex	Hex-Hex-Hex-Hex-Hex-(Hex-Hex-Hex-Hex-Hex-)Hex-HexNAc-(DeHex-)HexNAc+Hex	Hex-Hex-Hex-Hex-Hex-Hex-Hex-Hex-(Hex-Hex-)Hex-HexNAc-(DeHex-)HexNAc+Hex
					705	696	848.362	848.362	2	1694.71	17.37	830.358	-	-	No	0	1	148.64	0	0	FALSE	-	2-3-0-0-0		Hex-(Hex-)Hex-HexNAc-HexNAc+Hex	Hex-(Hex-)Hex-HexNAc-(DeHex-)HexNAc+Hex
					708	707	937.435	936.941	2	1871.87	17.4	1042.58	-	-	No	0	1	100.57	0	0	FALSE	-	2-3-0-0-0		Hex-(Hex-)Hex-HexNAc-HexNAc+Hex
					710	707	932.409	931.907	2	1861.8	17.41	696.614	-	-	No	0	1	100.31	0	0	FALSE	-	2-3-1-0-0		Hex-(Hex-)Hex-HexNAc-(DeHex-)HexNAc+Hex	Hex-(Hex-)Hex-HexNAc-HexNAc+Hex
					712	707	1129.44	1129.24	5	5641.17	17.42	1076.84	-	-	No	0	0.95	234.87	181.63	-1	TRUE	-	2-7-0-0-0	0-1-0-0-0	Hex-Hex-Hex-Hex-(Hex-)Hex-HexNAc-HexNAc+HexNAc1	Hex-Hex-Hex-(Hex-Hex-)Hex-HexNAc-HexNAc+HexNAc1	Hex-Hex-(Hex-Hex-Hex-)Hex-HexNAc-HexNAc+HexNAc1
					714	707	708.3	708.3	2	1414.58	17.44	698.686	-	-	No	0	1	108.77	0	0	FALSE	-	2-3-0-0-0		Hex-(Hex-)Hex-HexNAc-HexNAc+Hex	Hex-(Hex-)Hex-HexNAc-(DeHex-)HexNAc+Hex
					716	707	1185.47	1185.47	2	2368.93	17.45	989.484	-	-	No	0	1	160.69	0	0	FALSE	-	2-3-0-0-0		Hex-(Hex-)Hex-HexNAc-HexNAc+Hex
					719	718	737.365	737.365	2	1472.71	17.47	701.43	-	-	No	0	1	102.49	0	0	FALSE	-	2-3-0-0-0		Hex-(Hex-)Hex-HexNAc-HexNAc+Hex
					721	718	766.332	766.002	3	2294.99	17.48	730.995	-	-	No	0	1	115.39	0	0	FALSE	-	2-3-1-0-0		Hex-(Hex-)Hex-HexNAc-(DeHex-)HexNAc+Hex	Hex-(Hex-)Hex-HexNAc-HexNAc+Hex
					723	718	799.375	798.875	2	1595.74	17.49	504.696	-	-	No	0	1	42.61	0	0	FALSE	-	2-3-0-0-0		Hex-(Hex-)Hex-HexNAc-HexNAc+Hex
					725	718	987.951	987.951	2	1973.89	17.51	970.345	-	-	No	0	1	104.53	0	0	FALSE	-	2-3-0-0-0		Hex-(Hex-)Hex-HexNAc-HexNAc+Hex	Hex-(Hex-)Hex-HexNAc-(DeHex-)HexNAc+Hex
					727	718	1132.5	1132.5	2	2262.98	17.52	346.913	-	-	No	0	1	8.01	89.87	0	FALSE	-	4-3-3-0-0		DeHex-HexNAc-Hex-(DeHex-HexNAc-Hex-)Hex-HexNAc-(DeHex-)HexNAc+Hex	DeHex-HexNAc-(DeHex-HexNAc-)Hex-(Hex-)Hex-HexNAc-(DeHex-)HexNAc+Hex
					730	729	745.368	745.368	2	1488.72	17.54	693.157	-	-	No	0	1	111.92	0	0	FALSE	-	2-3-0-0-0		Hex-(Hex-)Hex-HexNAc-HexNAc+Hex
					732	729	824.375	824.375	2	1646.74	17.56	785.815	-	-	No	0	1	110.13	0	0	FALSE	-	2-3-1-0-0		Hex-(Hex-)Hex-HexNAc-(DeHex-)HexNAc+Hex	Hex-(Hex-)Hex-HexNAc-HexNAc+Hex
					734	729	841.351	841.351	2	1680.69	17.57	789.182	-	-	No	0	1	100.52	0	0	FALSE	-	2-3-1-0-0		Hex-(Hex-)Hex-HexNAc-(DeHex-)HexNAc+Hex	Hex-(Hex-)Hex-HexNAc-HexNAc+Hex
					736	729	826.877	826.373	2	1650.73	17.58	738.861	-	-	No	0	1	52.99	0	0	FALSE	-	2-3-0-0-0		Hex-(Hex-)Hex-HexNAc-HexNAc+Hex
					738	729	1170.39	1170.39	2	2338.76	17.59	1118.23	-	-	No	0	1	100.38	0	0	FALSE	-	2-3-0-0-0		Hex-(Hex-)Hex-HexNAc-HexNAc+Hex
					741	740	845.364	843.862	2	1685.71	17.61	793.267	-	-	No	0	1	108.96	0	0	FALSE	-	2-3-0-0-0		Hex-(Hex-)Hex-HexNAc-HexNAc+Hex
					743	740	837.377	837.043	3	2508.11	17.63	825.805	-	-	No	0	1	139.1	0	0	FALSE	-	2-3-1-0-0		Hex-(Hex-)Hex-HexNAc-(DeHex-)HexNAc+Hex
					745	740	970.016	969.681	3	2906.02	17.64	935.795	-	-	No	0	1	234.73	0	0	FALSE	-	2-3-0-0-0		Hex-(Hex-)Hex-HexNAc-HexNAc+Hex	Hex-(Hex-)Hex-HexNAc-(DeHex-)HexNAc+Hex
					747	740	788.383	788.383	2	1574.75	17.65	753.175	-	-	No	0	1	107.69	0	0	FALSE	-	2-3-0-0-0		Hex-(Hex-)Hex-HexNAc-HexNAc+Hex
					752	751	788.381	788.381	2	1574.75	17.69	753.201	-	-	No	0	1	110.6	0	0	FALSE	-	2-3-0-0-0		Hex-(Hex-)Hex-HexNAc-HexNAc+Hex
					754	751	664.8	664.302	2	1326.59	17.7	615.01	-	-	No	0	1	107.56	0	0	FALSE	-	2-3-0-0-0		Hex-(Hex-)Hex-HexNAc-HexNAc+Hex
					756	751	1255.06	1255.06	2	2508.11	17.71	892.544	-	-	No	0	1	164.27	0	0	FALSE	-	2-3-0-0-0		Hex-(Hex-)Hex-HexNAc-HexNAc+Hex
					758	751	1147.39	1147.39	2	2292.77	17.72	1095.94	-	-	No	0	1	29.95	0	0	FALSE	-	2-3-1-0-0		Hex-(Hex-)Hex-HexNAc-(DeHex-)HexNAc+Hex	Hex-(Hex-)Hex-HexNAc-HexNAc+Hex
					760	751	762.316	760.318	2	1518.62	17.73	708.813	-	-	No	0	1	115.17	0	0	FALSE	-	2-3-0-0-0		Hex-(Hex-)Hex-HexNAc-HexNAc+Hex
					763	762	985.447	985.114	3	2952.32	17.75	653.633	-	-	No	0	1	110.01	0	0	FALSE	-	2-3-0-0-0		Hex-(Hex-)Hex-HexNAc-HexNAc+Hex
					765	762	697.285	697.285	2	1392.56	17.77	662.69	-	-	No	0	1	50.44	0	0	FALSE	-	2-3-0-0-0		Hex-(Hex-)Hex-HexNAc-HexNAc+Hex
					767	762	1102.46	1101.95	2	2201.89	17.78	1084.72	-	-	No	0	1	111.83	0	0	FALSE	-	2-3-0-0-0		Hex-(Hex-)Hex-HexNAc-HexNAc+Hex
					769	762	889.429	888.927	2	1775.84	17.8	816.232	-	-	No	0	1	120.57	0	0	FALSE	-	2-3-0-0-0		Hex-(Hex-)Hex-HexNAc-HexNAc+Hex
					771	762	913.429	912.922	2	1823.83	17.81	799.648	-	-	No	0	1	108.09	0	0	FALSE	-	2-3-0-0-0		Hex-(Hex-)Hex-HexNAc-HexNAc+Hex	Hex-(Hex-)Hex-HexNAc-(DeHex-)HexNAc+Hex
					774	773	725.64	725.303	3	2172.89	17.83	671.292	-	-	No	0	1	104.23	0	0	FALSE	-	2-3-1-0-0		Hex-(Hex-)Hex-HexNAc-(DeHex-)HexNAc+Hex
					776	773	943.433	942.93	2	1883.85	17.85	832.731	-	-	No	0	1	20.76	0	0	FALSE	-	2-3-0-0-0		Hex-(Hex-)Hex-HexNAc-HexNAc+Hex
					778	773	920.941	920.941	2	1839.87	17.86	648.292	-	-	No	0	1	102.42	0	0	FALSE	-	2-3-0-0-0		Hex-(Hex-)Hex-HexNAc-HexNAc+Hex	Hex-(Hex-)Hex-HexNAc-(DeHex-)HexNAc+Hex
					780	773	681.292	681.292	2	1360.57	17.87	628.687	-	-	No	0	1	105.73	0	0	FALSE	-	2-3-0-0-0		Hex-(Hex-)Hex-HexNAc-HexNAc+Hex
					782	773	707.796	707.796	2	1413.58	17.88	600.633	-	-	No	0	1	116.16	0	0	FALSE	-	2-3-0-0-0		Hex-(Hex-)Hex-HexNAc-HexNAc+Hex
					785	784	675.024	675.024	3	2022.05	17.9	648.693	-	-	No	0	1	104.79	0	0	FALSE	-	2-3-0-0-0		Hex-(Hex-)Hex-HexNAc-HexNAc+Hex	Hex-(Hex-)Hex-HexNAc-(DeHex-)HexNAc+Hex
					787	784	810.881	810.881	2	1619.75	17.91	801.18	-	-	No	0	1	95.04	0	0	FALSE	-	2-3-0-0-0		Hex-(Hex-)Hex-HexNAc-HexNAc+Hex	Hex-(Hex-)Hex-HexNAc-(DeHex-)HexNAc+Hex
					789	784	833.353	833.353	2	1664.69	17.93	780.779	-	-	No	0	1	106.46	0	0	FALSE	-	2-3-0-0-0		Hex-(Hex-)Hex-HexNAc-HexNAc+Hex
					791	784	1097.93	1097.93	2	2193.85	17.94	1302.52	-	-	No	0	0.97	127.47	0	-1	TRUE	-	3-3-0-0-0	1-0-0-0-0	Hex-(Hex-)Hex-HexNAc-HexNAc+Hex1
					793	784	1104	1103.5	2	2204.99	17.95	901.544	-	-	No	0	1	123.78	0	0	FALSE	-	2-3-0-0-0		Hex-(Hex-)Hex-HexNAc-HexNAc+Hex
					796	795	800.376	798.873	2	1595.73	17.98	889.539	-	-	No	0	1	106.2	0	0	FALSE	-	2-3-0-0-0		Hex-(Hex-)Hex-HexNAc-HexNAc+Hex
					798	795	752.362	752.362	2	1502.71	17.99	956.575	-	-	No	0	1	7.43	0	0	FALSE	-	2-3-0-0-0		Hex-(Hex-)Hex-HexNAc-HexNAc+Hex
					800	795	982.745	982.411	3	2944.21	18	723.64	-	-	No	0	0.67	205.12	131.52	-1	TRUE	-	2-8-0-0-0	0-1-0-0-0	Hex-Hex-Hex-Hex-Hex-(Hex-)Hex-HexNAc-HexNAc+HexNAc1	Hex-Hex-Hex-Hex-(Hex-Hex-)Hex-HexNAc-HexNAc+HexNAc1	Hex-Hex-Hex-(Hex-Hex-Hex-)Hex-HexNAc-HexNAc+HexNAc1
					802	795	1149.46	1148.97	2	2295.93	18.01	918.562	-	-	No	0	1	114.45	0	0	FALSE	-	2-3-0-0-0		Hex-(Hex-)Hex-HexNAc-HexNAc+Hex
					804	795	1039.92	1039.92	2	2077.82	18.02	730.484	-	-	No	0	1	57.41	0	0	FALSE	-	2-3-1-0-0		Hex-(Hex-)Hex-HexNAc-(DeHex-)HexNAc+Hex	Hex-(Hex-)Hex-HexNAc-HexNAc+Hex
					807	806	742.87	742.87	2	1483.72	18.04	283.159	-	-	No	0	1	103.35	0	0	FALSE	-	2-3-1-0-0		Hex-(Hex-)Hex-HexNAc-(DeHex-)HexNAc+Hex	Hex-(Hex-)Hex-HexNAc-HexNAc+Hex
					809	806	728.348	728.009	3	2181	18.06	502.321	-	-	No	0	1	107.7	0	0	FALSE	-	2-3-0-0-0		Hex-(Hex-)Hex-HexNAc-HexNAc+Hex
					811	806	901.408	901.408	2	1800.8	18.07	830.259	-	-	No	0	1	113.24	0	0	FALSE	-	2-3-0-0-0		Hex-(Hex-)Hex-HexNAc-HexNAc+Hex
					813	806	758.346	758.346	2	1514.68	18.08	723.793	-	-	No	0	1	101.56	0	0	FALSE	-	2-3-0-0-0		Hex-(Hex-)Hex-HexNAc-HexNAc+Hex
					818	817	770.27	769.936	3	2306.78	18.11	735.325	-	-	No	0	1	100.12	0	0	FALSE	-	2-3-0-0-0		Hex-(Hex-)Hex-HexNAc-HexNAc+Hex	Hex-(Hex-)Hex-HexNAc-(DeHex-)HexNAc+Hex
					820	817	723.006	722.672	3	2164.99	18.13	656.337	-	-	No	0	1	120.77	0	0	FALSE	-	2-3-0-0-0		Hex-(Hex-)Hex-HexNAc-HexNAc+Hex
					822	817	1078	1078	2	2153.99	18.14	1352.63	-	-	No	0	1	101.11	0	0	FALSE	-	2-3-0-0-0		Hex-(Hex-)Hex-HexNAc-HexNAc+Hex
					824	817	903.925	903.421	2	1804.83	18.15	803.231	-	-	No	0	1	107.5	0	0	FALSE	-	2-3-0-0-0		Hex-(Hex-)Hex-HexNAc-HexNAc+Hex
					826	817	774.361	773.861	2	1545.71	18.16	669.917	-	-	No	0	1	106.95	0	0	FALSE	-	2-3-0-0-0		Hex-(Hex-)Hex-HexNAc-HexNAc+Hex
					829	828	716.646	716.306	3	2145.9	18.19	663.301	-	-	No	0	1	115.56	0	0	FALSE	-	2-3-0-0-0		Hex-(Hex-)Hex-HexNAc-HexNAc+Hex
					831	828	739.829	739.829	2	1477.64	18.2	516.237	-	-	No	0	1	37.24	0	0	FALSE	-	2-3-0-0-0		Hex-(Hex-)Hex-HexNAc-HexNAc+Hex
					833	828	793.374	793.374	2	1584.73	18.21	465.489	-	-	No	0	1	150.79	0	0	FALSE	-	2-3-0-0-0		Hex-(Hex-)Hex-HexNAc-HexNAc+Hex
					835	828	910.428	909.933	2	1817.85	18.22	858.839	-	-	No	0	1	104.87	0	0	FALSE	-	2-3-0-0-0		Hex-(Hex-)Hex-HexNAc-HexNAc+Hex
					837	828	1074.44	1073.94	2	2145.86	18.24	1430.76	-	-	No	0	1	101.8	0	0	FALSE	-	2-3-0-0-0		Hex-(Hex-)Hex-HexNAc-HexNAc+Hex
					840	839	735.263	734.928	3	2201.76	18.26	780.718	-	-	No	0	1	159.28	0	0	FALSE	-	2-3-1-0-0		Hex-(Hex-)Hex-HexNAc-(DeHex-)HexNAc+Hex	Hex-(Hex-)Hex-HexNAc-HexNAc+Hex
					842	839	650.327	650.327	3	1947.96	18.27	393.45	-	-	No	0	1	114.3	0	0	FALSE	-	2-3-0-0-0		Hex-(Hex-)Hex-HexNAc-HexNAc+Hex	Hex-(Hex-)Hex-HexNAc-(DeHex-)HexNAc+Hex
					844	839	1083.51	1083.51	2	2165.01	18.28	1295.58	-	-	No	0	1	105.47	0	0	FALSE	-	2-3-0-0-0		Hex-(Hex-)Hex-HexNAc-HexNAc+Hex
					846	839	874.875	874.875	2	1747.73	18.29	833.409	-	-	No	0	1	104.02	0	0	FALSE	-	2-3-0-0-0		Hex-(Hex-)Hex-HexNAc-HexNAc+Hex
					848	839	678.317	678.317	2	1354.62	18.3	642.778	-	-	No	0	1	144.16	0	0	FALSE	-	2-3-0-0-0		Hex-(Hex-)Hex-HexNAc-HexNAc+Hex
					851	850	661.645	661.31	3	1980.91	18.32	524.264	-	-	No	0	1	103.22	0	0	FALSE	-	2-3-0-0-0		Hex-(Hex-)Hex-HexNAc-HexNAc+Hex
					853	850	1126.89	1126.38	2	2250.75	18.34	799.867	-	-	No	0	1	102.66	0	0	FALSE	-	2-3-1-0-0		Hex-(Hex-)Hex-HexNAc-(DeHex-)HexNAc+Hex
					855	850	980.081	979.415	3	2935.22	18.35	666.638	-	-	No	0	1	164.26	225.64	0	FALSE	-	2-7-0-0-0		Hex-Hex-Hex-Hex-Hex-(Hex-)Hex-HexNAc-HexNAc+Hex	Hex-Hex-Hex-Hex-(Hex-Hex-)Hex-HexNAc-HexNAc+Hex	Hex-Hex-Hex-(Hex-Hex-Hex-)Hex-HexNAc-HexNAc+Hex
					857	850	1058.44	1057.95	2	2113.88	18.36	730.143	-	-	No	0	1	191.07	0	0	FALSE	-	2-3-0-0-0		Hex-(Hex-)Hex-HexNAc-HexNAc+Hex	Hex-(Hex-)Hex-HexNAc-(DeHex-)HexNAc+Hex
					859	850	796.359	796.359	2	1590.7	18.38	743.256	-	-	No	0	1	140.58	0	0	FALSE	-	2-3-0-0-0		Hex-(Hex-)Hex-HexNAc-HexNAc+Hex
					862	861	686.298	686.298	3	2055.87	18.4	674.451	-	-	No	0	1	113.1	0	0	FALSE	-	2-3-1-0-0		Hex-(Hex-)Hex-HexNAc-(DeHex-)HexNAc+Hex
					864	861	780.87	780.87	2	1559.72	18.41	759.45	-	-	No	0	1	136.5	0	0	FALSE	-	2-3-0-0-0		Hex-(Hex-)Hex-HexNAc-HexNAc+Hex
					866	861	712.874	712.874	2	1423.73	18.42	660.601	-	-	No	0	1	100.89	0	0	FALSE	-	2-3-0-0-0		Hex-(Hex-)Hex-HexNAc-HexNAc+Hex
					868	861	927.95	927.95	2	1853.88	18.43	919.293	-	-	No	0	1	102.2	0	0	FALSE	-	2-3-0-0-0		Hex-(Hex-)Hex-HexNAc-HexNAc+Hex
					870	861	1068.44	1067.94	2	2133.87	18.44	918.545	-	-	No	0	1	113.7	0	-3	TRUE	-	3-5-0-0-0	1-2-0-0-0	Hex-(Hex-)Hex-HexNAc-HexNAc+Hex1HexNAc2
					873	872	791.307	791.307	2	1580.6	18.46	755.81	-	-	No	0	1	104.75	0	0	FALSE	-	2-3-0-0-0		Hex-(Hex-)Hex-HexNAc-HexNAc+Hex
					875	872	806.892	806.393	2	1610.77	18.48	408.451	-	-	No	0	1	109.71	0	0	FALSE	-	2-3-1-0-0		Hex-(Hex-)Hex-HexNAc-(DeHex-)HexNAc+Hex	Hex-(Hex-)Hex-HexNAc-HexNAc+Hex
					877	872	700.865	700.865	2	1399.71	18.49	572.576	-	-	No	0	1	57.53	0	0	FALSE	-	2-3-0-0-0		Hex-(Hex-)Hex-HexNAc-HexNAc+Hex	Hex-(Hex-)Hex-HexNAc-(DeHex-)HexNAc+Hex
					879	872	657.793	657.793	2	1313.57	18.5	462.214	-	-	No	0	1	93.2	0	0	FALSE	-	2-3-1-0-0		Hex-(Hex-)Hex-HexNAc-(DeHex-)HexNAc+Hex	Hex-(Hex-)Hex-HexNAc-HexNAc+Hex
					881	872	673.312	673.312	2	1344.61	18.51	664.566	-	-	No	0	1	73.99	0	0	FALSE	-	2-3-0-0-0		Hex-(Hex-)Hex-HexNAc-HexNAc+Hex
					884	883	883.016	882.344	3	2644.01	18.53	812.692	-	-	No	0	1	101.04	0	0	FALSE	-	2-3-1-0-0		Hex-(Hex-)Hex-HexNAc-(DeHex-)HexNAc+Hex	Hex-(Hex-)Hex-HexNAc-HexNAc+Hex
					888	883	654.835	654.835	2	1307.65	18.56	602.845	-	-	No	0	1	72.39	0	0	FALSE	-	2-3-0-0-0		Hex-(Hex-)Hex-HexNAc-HexNAc+Hex	Hex-(Hex-)Hex-HexNAc-(DeHex-)HexNAc+Hex
					890	883	809.41	809.073	3	2424.2	18.57	756.185	-	-	No	0	1	105.7	0	0	FALSE	-	2-3-0-0-0		Hex-(Hex-)Hex-HexNAc-HexNAc+Hex
					892	883	1029.44	1028.95	2	2055.89	18.58	586.246	-	-	No	0	1	25.74	100	0	FALSE	-	2-4-0-0-0		Hex-Hex-(Hex-)Hex-HexNAc-HexNAc+Hex	Hex-(Hex-Hex-)Hex-HexNAc-HexNAc+Hex
					895	894	667.604	667.268	3	1998.78	18.61	632.01	-	-	No	0	1	110.64	0	0	FALSE	-	2-3-0-0-0		Hex-(Hex-)Hex-HexNAc-HexNAc+Hex
					897	894	972.952	972.952	2	1943.89	18.62	885.522	-	-	No	0	1	37.98	0	0	FALSE	-	2-3-0-0-0		Hex-(Hex-)Hex-HexNAc-HexNAc+Hex
					899	894	770.363	770.363	2	1538.71	18.63	387.43	-	-	No	0	1	125.39	0	0	FALSE	-	2-3-0-0-0		Hex-(Hex-)Hex-HexNAc-HexNAc+Hex
					901	894	804.381	804.381	2	1606.75	18.64	750.84	-	-	No	0	1	75.26	0	0	FALSE	-	2-3-0-0-0		Hex-(Hex-)Hex-HexNAc-HexNAc+Hex
					903	894	1205	1205	2	2407.98	18.66	1192.6	-	-	No	0	1	114.11	0	-3	TRUE	-	3-5-0-0-0	1-2-0-0-0	Hex-(Hex-)Hex-HexNAc-HexNAc+Hex1HexNAc2
					906	905	703.34	703.34	2	1404.66	18.68	667.76	-	-	No	0	1	105.71	0	0	FALSE	-	2-3-0-0-0		Hex-(Hex-)Hex-HexNAc-HexNAc+Hex
					910	905	671.807	671.807	2	1341.6	18.7	560.737	-	-	No	0	1	112.76	0	0	FALSE	-	2-3-0-0-0		Hex-(Hex-)Hex-HexNAc-HexNAc+Hex
					912	905	813.378	813.378	2	1624.74	18.71	760.186	-	-	No	0	1	105.02	0	0	FALSE	-	2-3-0-0-0		Hex-(Hex-)Hex-HexNAc-HexNAc+Hex
					914	905	695.995	695.659	3	2083.95	18.72	670.047	-	-	No	0	1	118.46	0	0	FALSE	-	2-3-0-0-0		Hex-(Hex-)Hex-HexNAc-HexNAc+Hex
					917	916	690.881	690.881	2	1379.75	18.74	682.172	-	-	No	0	1	101.4	0	0	FALSE	-	2-3-1-0-0		Hex-(Hex-)Hex-HexNAc-(DeHex-)HexNAc+Hex	Hex-(Hex-)Hex-HexNAc-HexNAc+Hex
					919	916	758.859	758.859	2	1515.7	18.75	734.88	-	-	No	0	1	104.86	0	0	FALSE	-	2-3-0-0-0		Hex-(Hex-)Hex-HexNAc-HexNAc+Hex	Hex-(Hex-)Hex-HexNAc-(DeHex-)HexNAc+Hex
					921	916	718.366	717.862	2	1433.71	18.76	596.475	-	-	No	0	1	120.68	0	0	FALSE	-	2-3-0-0-0		Hex-(Hex-)Hex-HexNAc-HexNAc+Hex
					923	916	817.033	816.699	3	2447.07	18.77	387.43	-	-	No	0	1	7.98	138.44	0	FALSE	-	4-4-0-0-0		Hex-HexNAc-Hex-(HexNAc-Hex-)Hex-HexNAc-HexNAc+Hex	HexNAc-(Hex-)Hex-(HexNAc-Hex-)Hex-HexNAc-HexNAc+Hex	HexNAc-(HexNAc-)Hex-(Hex-Hex-)Hex-HexNAc-HexNAc+Hex	HexNAc-(Hex-HexNAc-)Hex-(Hex-)Hex-HexNAc-HexNAc+Hex	Hex-HexNAc-(HexNAc-)Hex-(Hex-)Hex-HexNAc-HexNAc+Hex	HexNAc-Hex-(Hex-HexNAc-Hex-)Hex-HexNAc-HexNAc+Hex	HexNAc-Hex-(HexNAc-(Hex-)Hex-)Hex-HexNAc-HexNAc+Hex
					925	916	804.377	804.377	2	1606.74	18.78	755.731	-	-	No	0	1	103.35	0	0	FALSE	-	2-3-0-0-0		Hex-(Hex-)Hex-HexNAc-HexNAc+Hex
					928	927	668.832	667.83	2	1333.64	18.81	474.25	-	-	No	0	1	114.76	0	0	FALSE	-	2-3-1-0-0		Hex-(Hex-)Hex-HexNAc-(DeHex-)HexNAc+Hex	Hex-(Hex-)Hex-HexNAc-HexNAc+Hex
					930	927	892.946	892.946	2	1783.88	18.82	839.299	-	-	No	0	1	121.45	0	0	FALSE	-	2-3-1-0-0		Hex-(Hex-)Hex-HexNAc-(DeHex-)HexNAc+Hex	Hex-(Hex-)Hex-HexNAc-HexNAc+Hex
					932	927	1216.45	1215.95	2	2429.89	18.83	324.65	-	-	No	0	1	126.74	0	0	FALSE	-	2-3-1-0-0		Hex-(Hex-)Hex-HexNAc-(DeHex-)HexNAc+Hex	Hex-(Hex-)Hex-HexNAc-HexNAc+Hex
					934	927	865.428	865.09	3	2592.25	18.84	1094.44	-	-	No	0	1	122.92	0	0	FALSE	-	2-3-0-0-0		Hex-(Hex-)Hex-HexNAc-HexNAc+Hex
					941	938	846.388	846.388	2	1690.76	18.9	793.15	-	-	No	0	1	102.31	0	0	FALSE	-	2-3-0-0-0		Hex-(Hex-)Hex-HexNAc-HexNAc+Hex
					943	938	1124.46	1123.96	2	2245.91	18.91	698.62	-	-	No	0	1	115.66	0	0	FALSE	-	2-3-1-0-0		Hex-(Hex-)Hex-HexNAc-(DeHex-)HexNAc+Hex
					945	938	752.369	752.369	2	1502.72	18.92	496.293	-	-	No	0	1	102.73	0	0	FALSE	-	2-3-0-0-0		Hex-(Hex-)Hex-HexNAc-HexNAc+Hex
					947	938	897.422	896.922	2	1791.83	18.94	844.744	-	-	No	0	1	104.17	0	0	FALSE	-	2-3-0-0-0		Hex-(Hex-)Hex-HexNAc-HexNAc+Hex
					950	949	764.396	764.396	2	1526.78	18.97	711.258	-	-	No	0	1	104.39	0	0	FALSE	-	2-3-0-0-0		Hex-(Hex-)Hex-HexNAc-HexNAc+Hex
					952	949	709.309	709.309	3	2124.91	18.98	691.623	-	-	No	0	1	108.63	0	0	FALSE	-	2-3-0-0-0		Hex-(Hex-)Hex-HexNAc-HexNAc+Hex
					954	949	1297.53	1297.02	2	2592.02	18.99	1214.61	-	-	No	0	1	121.72	0	0	FALSE	-	2-3-0-0-0		Hex-(Hex-)Hex-HexNAc-HexNAc+Hex
					956	949	849.358	848.85	2	1695.69	19.01	797.157	-	-	No	0	1	85.51	0	0	FALSE	-	2-3-0-0-0		Hex-(Hex-)Hex-HexNAc-HexNAc+Hex
					958	949	776.355	776.355	2	1550.69	19.02	723.239	-	-	No	0	1	111.78	0	0	FALSE	-	2-3-0-0-0		Hex-(Hex-)Hex-HexNAc-HexNAc+Hex
					961	960	987.415	986.914	2	1971.81	19.04	918.573	-	-	No	0	1	111.97	0	-2	TRUE	-	3-4-0-0-0	1-1-0-0-0	Hex-(Hex-)Hex-HexNAc-HexNAc+Hex1HexNAc1
					963	960	1134.93	1134.93	2	2267.84	19.06	1013.56	-	-	No	0	1	130.83	0	0	FALSE	-	2-3-0-0-0		Hex-(Hex-)Hex-HexNAc-HexNAc+Hex
					965	960	779.371	778.871	2	1555.73	19.07	726.396	-	-	No	0	1	101.7	0	0	FALSE	-	2-3-0-0-0		Hex-(Hex-)Hex-HexNAc-HexNAc+Hex
					967	960	862.356	861.851	2	1721.69	19.08	844.689	-	-	No	0	1	90.3	0	0	FALSE	-	2-3-0-0-0		Hex-(Hex-)Hex-HexNAc-HexNAc+Hex
					969	960	910.893	910.893	2	1819.77	19.1	858.32	-	-	No	0	1	100.9	0	0	FALSE	-	2-3-0-0-0		Hex-(Hex-)Hex-HexNAc-HexNAc+Hex
					972	971	693.359	693.359	2	1384.7	19.12	684.157	-	-	No	0	1	116.24	0	0	FALSE	-	2-3-0-0-0		Hex-(Hex-)Hex-HexNAc-HexNAc+Hex
					974	971	824.418	824.418	2	1646.82	19.13	441.227	-	-	No	0	1	111.63	0	0	FALSE	-	2-3-0-0-0		Hex-(Hex-)Hex-HexNAc-HexNAc+Hex	Hex-(Hex-)Hex-HexNAc-(DeHex-)HexNAc+Hex
					978	971	837.373	837.043	3	2508.11	19.16	643.717	-	-	No	0	1	110.81	0	0	FALSE	-	2-3-1-0-0		Hex-(Hex-)Hex-HexNAc-(DeHex-)HexNAc+Hex
					980	971	1092.92	1092.68	4	4366.67	19.17	929.871	-	-	No	0	1	6.28	151.6	0	FALSE	-	3-6-0-0-0		Hex-HexNAc-Hex-(Hex-(Hex-)Hex-)Hex-HexNAc-HexNAc+Hex	Hex-(Hex-Hex-)Hex-(HexNAc-Hex-)Hex-HexNAc-HexNAc+Hex	Hex-(Hex-)Hex-(HexNAc-(Hex-)Hex-)Hex-HexNAc-HexNAc+Hex	Hex-(Hex-)Hex-(Hex-HexNAc-Hex-)Hex-HexNAc-HexNAc+Hex	Hex-HexNAc-(Hex-)Hex-(Hex-Hex-)Hex-HexNAc-HexNAc+Hex	HexNAc-(Hex-Hex-)Hex-(Hex-Hex-)Hex-HexNAc-HexNAc+Hex	Hex-HexNAc-Hex-(Hex-Hex-Hex-)Hex-HexNAc-HexNAc+Hex	HexNAc-(Hex-)Hex-(Hex-(Hex-)Hex-)Hex-HexNAc-HexNAc+Hex	HexNAc-(Hex-)Hex-(Hex-Hex-Hex-)Hex-HexNAc-HexNAc+Hex
					983	982	755.622	755.376	4	3017.48	19.2	464.947	-	-	No	0	1	87.27	112.32	0	FALSE	-	4-4-0-1-0		NeuAc-Hex-HexNAc-(HexNAc-)Hex-(Hex-)Hex-HexNAc-HexNAc+Hex	NeuAc-Hex-HexNAc-Hex-(HexNAc-Hex-)Hex-HexNAc-HexNAc+Hex
					987	982	993.503	993.001	2	1983.99	19.22	1614	-	-	No	0	1	100.2	0	0	FALSE	-	2-3-0-0-0		Hex-(Hex-)Hex-HexNAc-HexNAc+Hex
					989	982	850.399	849.899	2	1697.78	19.23	459.729	-	-	No	0	1	31.04	0	0	FALSE	-	2-3-0-0-0		Hex-(Hex-)Hex-HexNAc-HexNAc+Hex
					991	982	887.409	887.409	2	1772.8	19.24	490.477	-	-	No	0	1	106.42	0	0	FALSE	-	2-3-0-0-0		Hex-(Hex-)Hex-HexNAc-HexNAc+Hex
					994	993	747.867	747.867	2	1493.72	19.26	496.233	-	-	No	0	1	113.79	0	0	FALSE	-	2-3-0-0-0		Hex-(Hex-)Hex-HexNAc-HexNAc+Hex
					996	993	871.041	870.709	3	2609.11	19.28	828.091	-	-	No	0	1	108.63	0	0	FALSE	-	2-3-1-0-0		Hex-(Hex-)Hex-HexNAc-(DeHex-)HexNAc+Hex
					998	993	1230.45	1229.95	2	2457.88	19.29	1013.61	-	-	No	0	1	129.06	0	0	FALSE	-	2-3-0-0-0		Hex-(Hex-)Hex-HexNAc-HexNAc+Hex
					1000	993	934.37	934.038	3	2799.09	19.3	732.135	-	-	No	0	1	218.31	0	0	FALSE	-	2-3-0-0-0		Hex-(Hex-)Hex-HexNAc-HexNAc+Hex
					1002	993	827.85	827.85	2	1653.68	19.31	806.359	-	-	No	0	1	109.59	0	0	FALSE	-	2-3-0-0-0		Hex-(Hex-)Hex-HexNAc-HexNAc+Hex
					1005	1004	652.319	651.987	3	1952.94	19.33	634.236	-	-	No	0	1	144.06	0	0	FALSE	-	2-3-1-0-0		Hex-(Hex-)Hex-HexNAc-(DeHex-)HexNAc+Hex
					1007	1004	905.885	905.885	2	1809.76	19.35	918.593	-	-	No	0	1	107.81	0	-1	TRUE	-	3-3-0-0-0	1-0-0-0-0	Hex-(Hex-)Hex-HexNAc-HexNAc+Hex1
					1009	1004	1004.08	1003.74	3	3008.2	19.36	625.309	-	-	No	0	1	108.41	96.79	0	FALSE	-	3-4-0-0-1		NeuGc-Hex-HexNAc-Hex-(Hex-)Hex-HexNAc-HexNAc+Hex
					1011	1004	1113.48	1112.98	2	2223.95	19.37	1060.78	-	-	No	0	1	100.11	0	0	FALSE	-	2-3-0-0-0		Hex-(Hex-)Hex-HexNAc-HexNAc+Hex
					1013	1004	774.344	774.344	2	1546.67	19.38	722.272	-	-	No	0	1	102.85	0	0	FALSE	-	2-3-1-0-0		Hex-(Hex-)Hex-HexNAc-(DeHex-)HexNAc+Hex	Hex-(Hex-)Hex-HexNAc-HexNAc+Hex
					1016	1015	707.312	707.312	3	2118.91	19.4	669.92	-	-	No	0	1	197.53	0	0	FALSE	-	2-3-0-0-0		Hex-(Hex-)Hex-HexNAc-HexNAc+Hex	Hex-(Hex-)Hex-HexNAc-(DeHex-)HexNAc+Hex
					1018	1015	725.304	725.304	3	2172.89	19.42	637	-	-	No	0	1	103.64	0	0	FALSE	-	2-3-0-0-0		Hex-(Hex-)Hex-HexNAc-HexNAc+Hex
					1020	1015	681.838	681.838	2	1361.66	19.43	629.684	-	-	No	0	1	103.25	0	0	FALSE	-	2-3-0-0-0		Hex-(Hex-)Hex-HexNAc-HexNAc+Hex	Hex-(Hex-)Hex-HexNAc-(DeHex-)HexNAc+Hex
					1022	1015	913.746	913.413	3	2737.22	19.44	901.931	-	-	No	0	1	132.44	1	0	FALSE	-	3-3-0-0-0		Hex-(HexNAc-Hex-)Hex-HexNAc-HexNAc+Hex	HexNAc-Hex-(Hex-)Hex-HexNAc-HexNAc+Hex
					1024	1015	921.93	921.93	2	1841.85	19.45	813.495	-	-	No	0	1	175.74	0	0	FALSE	-	2-3-0-0-0		Hex-(Hex-)Hex-HexNAc-HexNAc+Hex
					1027	1026	821.422	821.088	3	2460.24	19.47	809.991	-	-	No	0	1	193.05	0	0	FALSE	-	2-3-0-0-0		Hex-(Hex-)Hex-HexNAc-HexNAc+Hex
					1029	1026	831.856	831.856	2	1661.7	19.48	784.119	-	-	No	0	1	132.3	0	0	FALSE	-	2-3-0-0-0		Hex-(Hex-)Hex-HexNAc-HexNAc+Hex
					1031	1026	786.41	786.41	2	1570.81	19.49	677.31	-	-	No	0	1	104.47	0	0	FALSE	-	2-3-0-0-0		Hex-(Hex-)Hex-HexNAc-HexNAc+Hex
					1033	1026	762.656	762.656	3	2284.95	19.5	695.683	-	-	No	0	1	111.74	0	0	FALSE	-	2-3-0-0-0		Hex-(Hex-)Hex-HexNAc-HexNAc+Hex
					1035	1026	890.381	889.717	3	2666.13	19.51	856.718	-	-	No	0	1	114.28	0	0	FALSE	-	2-3-1-0-0		Hex-(Hex-)Hex-HexNAc-(DeHex-)HexNAc+Hex
					1038	1037	798.881	798.881	2	1595.75	19.54	745.58	-	-	No	0	1	122.75	0	0	FALSE	-	2-3-0-0-0		Hex-(Hex-)Hex-HexNAc-HexNAc+Hex
					1040	1037	919.389	918.893	2	1835.77	19.55	878.865	-	-	No	0	1	110.52	0	0	FALSE	-	2-3-0-0-0		Hex-(Hex-)Hex-HexNAc-HexNAc+Hex
					1042	1037	1188.49	1187.98	2	2373.95	19.56	996.563	-	-	No	0	1	123.72	0	0	FALSE	-	2-3-0-0-0		Hex-(Hex-)Hex-HexNAc-HexNAc+Hex
					1044	1037	961.919	961.919	2	1921.82	19.58	1294.59	-	-	No	0	1	102.67	0	0	FALSE	-	2-3-0-0-0		Hex-(Hex-)Hex-HexNAc-HexNAc+Hex
					1046	1037	855.83	855.83	2	1709.64	19.59	463.356	-	-	No	0	1	141.57	0	0	FALSE	-	2-3-0-0-0		Hex-(Hex-)Hex-HexNAc-HexNAc+Hex
					1051	1048	731.328	731.328	2	1460.64	19.63	678.224	-	-	No	0	1	34.28	0	0	FALSE	-	2-3-0-0-0		Hex-(Hex-)Hex-HexNAc-HexNAc+Hex
					1055	1048	840.068	839.742	3	2516.2	19.65	763.473	-	-	No	0	1	101.72	0	0	FALSE	-	2-3-0-0-0		Hex-(Hex-)Hex-HexNAc-HexNAc+Hex
					1057	1048	876.972	876.972	2	1751.93	19.67	868.331	-	-	No	0	1	107.05	0	0	FALSE	-	2-3-0-0-0		Hex-(Hex-)Hex-HexNAc-HexNAc+Hex
					1060	1059	768.366	767.865	2	1533.72	19.69	715.63	-	-	No	0	1	100.46	0	0	FALSE	-	2-3-0-0-0		Hex-(Hex-)Hex-HexNAc-HexNAc+Hex
					1062	1059	1609.16	1609.16	2	3216.32	19.71	1513.87	-	-	No	0	1	116.85	0	0	FALSE	-	2-3-0-0-0		Hex-(Hex-)Hex-HexNAc-HexNAc+Hex
					1064	1059	1149.43	1148.92	2	2295.83	19.72	1013.56	-	-	No	0	1	129.63	0	0	FALSE	-	2-3-0-0-0		Hex-(Hex-)Hex-HexNAc-HexNAc+Hex
					1066	1059	1080.44	1080.1	3	3237.27	19.74	606.255	-	-	No	0	0.97	66.25	315.83	-1	TRUE	-	3-10-0-0-0	0-1-0-0-0	Hex-Hex-Hex-Hex-Hex-(Hex-)Hex-(HexNAc-Hex-)Hex-HexNAc-HexNAc+HexNAc1	Hex-Hex-Hex-Hex-(Hex-)Hex-(HexNAc-(Hex-)Hex-)Hex-HexNAc-HexNAc+HexNAc1	Hex-Hex-Hex-Hex-(Hex-)Hex-(Hex-HexNAc-Hex-)Hex-HexNAc-HexNAc+HexNAc1	Hex-Hex-Hex-(Hex-Hex-Hex-)Hex-(HexNAc-Hex-)Hex-HexNAc-HexNAc+HexNAc1	Hex-Hex-Hex-(Hex-Hex-)Hex-(Hex-HexNAc-Hex-)Hex-HexNAc-HexNAc+HexNAc1	Hex-Hex-Hex-(Hex-)Hex-(Hex-HexNAc-(Hex-)Hex-)Hex-HexNAc-HexNAc+HexNAc1	Hex-Hex-Hex-(Hex-)Hex-(HexNAc-(Hex-Hex-)Hex-)Hex-HexNAc-HexNAc+HexNAc1	Hex-Hex-(Hex-Hex-Hex-)Hex-(HexNAc-(Hex-)Hex-)Hex-HexNAc-HexNAc+HexNAc1	Hex-Hex-Hex-Hex-(Hex-Hex-)Hex-(HexNAc-Hex-)Hex-HexNAc-HexNAc+HexNAc1	Hex-Hex-(Hex-Hex-)Hex-(Hex-HexNAc-(Hex-)Hex-)Hex-HexNAc-HexNAc+HexNAc1	Hex-Hex-(Hex-Hex-)Hex-(HexNAc-(Hex-Hex-)Hex-)Hex-HexNAc-HexNAc+HexNAc1	Hex-Hex-Hex-(Hex-Hex-)Hex-(HexNAc-(Hex-)Hex-)Hex-HexNAc-HexNAc+HexNAc1	Hex-Hex-(Hex-)Hex-(Hex-HexNAc-(Hex-Hex-)Hex-)Hex-HexNAc-HexNAc+HexNAc1	Hex-Hex-Hex-Hex-Hex-(Hex-HexNAc-(Hex-)Hex-)Hex-HexNAc-HexNAc+HexNAc1	Hex-Hex-Hex-Hex-Hex-(HexNAc-(Hex-Hex-)Hex-)Hex-HexNAc-HexNAc+HexNAc1	Hex-Hex-Hex-Hex-(Hex-HexNAc-(Hex-Hex-)Hex-)Hex-HexNAc-HexNAc+HexNAc1	Hex-Hex-(Hex-Hex-Hex-)Hex-(Hex-HexNAc-Hex-)Hex-HexNAc-HexNAc+HexNAc1	Hex-Hex-Hex-Hex-(Hex-Hex-Hex-(HexNAc-)Hex-)Hex-HexNAc-HexNAc+HexNAc1	Hex-Hex-Hex-Hex-(Hex-Hex-(Hex-HexNAc-)Hex-)Hex-HexNAc-HexNAc+HexNAc1	Hex-HexNAc-(Hex-Hex-Hex-)Hex-(Hex-Hex-Hex-)Hex-HexNAc-HexNAc+HexNAc1	Hex-Hex-Hex-Hex-Hex-Hex-(Hex-HexNAc-Hex-)Hex-HexNAc-HexNAc+HexNAc1	Hex-HexNAc-(Hex-Hex-)Hex-(Hex-Hex-Hex-Hex-)Hex-HexNAc-HexNAc+HexNAc1	Hex-Hex-Hex-Hex-(HexNAc-)Hex-(Hex-Hex-Hex-)Hex-HexNAc-HexNAc+HexNAc1	Hex-Hex-Hex-(Hex-HexNAc-)Hex-(Hex-Hex-Hex-)Hex-HexNAc-HexNAc+HexNAc1	Hex-Hex-Hex-(HexNAc-)Hex-(Hex-Hex-Hex-Hex-)Hex-HexNAc-HexNAc+HexNAc1
					1068	1059	1087.78	1087.12	3	3258.35	19.75	860.494	-	-	No	0	1	42.35	167.69	0	FALSE	-	2-7-0-0-0		Hex-Hex-Hex-Hex-Hex-(Hex-)Hex-HexNAc-HexNAc+Hex	Hex-Hex-Hex-Hex-(Hex-Hex-)Hex-HexNAc-HexNAc+Hex	Hex-Hex-Hex-(Hex-Hex-Hex-)Hex-HexNAc-HexNAc+Hex
					1073	1070	722.321	722.321	3	2163.94	19.79	687.748	-	-	No	0	1	100.85	0	0	FALSE	-	2-3-0-0-0		Hex-(Hex-)Hex-HexNAc-HexNAc+Hex
					1075	1070	743.989	743.317	3	2226.93	19.8	672.824	-	-	No	0	1	101.81	0	0	FALSE	-	2-3-0-0-0		Hex-(Hex-)Hex-HexNAc-HexNAc+Hex
					1077	1070	710.867	710.37	2	1418.72	19.81	657.693	-	-	No	0	1	103.16	0	0	FALSE	-	2-3-0-0-0		Hex-(Hex-)Hex-HexNAc-HexNAc+Hex
					1079	1070	679.302	678.805	2	1355.6	19.82	380.702	-	-	No	0	1	41.31	0	0	FALSE	-	2-3-0-0-0		Hex-(Hex-)Hex-HexNAc-HexNAc+Hex
					1082	1081	715.331	714.838	2	1427.66	19.84	524.264	-	-	No	0	1	101.42	0	0	FALSE	-	2-3-0-0-0		Hex-(Hex-)Hex-HexNAc-HexNAc+Hex
					1084	1081	874.365	874.032	3	2619.07	19.85	508.431	-	-	No	0	1	138.74	138.84	0	FALSE	-	2-8-0-0-0		Hex-Hex-Hex-Hex-Hex-(Hex-Hex-)Hex-HexNAc-HexNAc+Hex	Hex-Hex-Hex-Hex-(Hex-Hex-Hex-)Hex-HexNAc-HexNAc+Hex	Hex-Hex-Hex-Hex-Hex-Hex-(Hex-)Hex-HexNAc-HexNAc+Hex	Hex-Hex-Hex-(Hex-Hex-Hex-Hex-)Hex-HexNAc-HexNAc+Hex
					1088	1081	938.088	937.752	3	2810.24	19.87	656.655	-	-	No	1	0.99	250.12	120.15	-1	TRUE	-	2-8-0-0-0	0-1-0-0-0	Hex-Hex-Hex-Hex-Hex-(Hex-)Hex-HexNAc-HexNAc+HexNAc1	Hex-Hex-Hex-Hex-(Hex-Hex-)Hex-HexNAc-HexNAc+HexNAc1	Hex-Hex-Hex-(Hex-Hex-Hex-)Hex-HexNAc-HexNAc+HexNAc1
					1093	1092	650.289	650.289	3	1947.85	19.91	615.551	-	-	No	0	1	100.8	0	0	FALSE	-	2-3-1-0-0		Hex-(Hex-)Hex-HexNAc-(DeHex-)HexNAc+Hex	Hex-(Hex-)Hex-HexNAc-HexNAc+Hex
					1095	1092	684.293	684.293	3	2049.86	19.92	649.651	-	-	No	0	1	100.35	0	0	FALSE	-	2-3-0-0-0		Hex-(Hex-)Hex-HexNAc-HexNAc+Hex
					1097	1092	740.383	740.045	3	2217.11	19.93	729.343	-	-	No	0	1	148.13	0	0	FALSE	-	2-3-0-0-0		Hex-(Hex-)Hex-HexNAc-HexNAc+Hex	Hex-(Hex-)Hex-HexNAc-(DeHex-)HexNAc+Hex
					1101	1092	951.91	951.91	2	1901.81	19.96	1010.7	-	-	No	0	1	106.25	0	-1	TRUE	-	3-3-0-0-0	1-0-0-0-0	Hex-(Hex-)Hex-HexNAc-HexNAc+Hex1
					1104	1103	791.319	791.319	2	1580.62	19.98	735.476	-	-	No	0	1	109.53	0	0	FALSE	-	2-3-0-0-0		Hex-(Hex-)Hex-HexNAc-HexNAc+Hex
					1112	1103	674.965	674.304	3	2019.89	20.03	639.634	-	-	No	0	1	102.98	0	0	FALSE	-	2-3-0-0-0		Hex-(Hex-)Hex-HexNAc-HexNAc+Hex
					1115	1114	720.313	719.979	3	2156.91	20.05	851.168	-	-	No	0	1	187.16	0	0	FALSE	-	2-3-0-0-0		Hex-(Hex-)Hex-HexNAc-HexNAc+Hex	Hex-(Hex-)Hex-HexNAc-(DeHex-)HexNAc+Hex
					1119	1114	1528.63	1528.13	2	3054.24	20.07	759.132	-	-	No	0	1	72.8	85.83	0	FALSE	-	2-7-0-0-0		Hex-Hex-Hex-Hex-Hex-(Hex-)Hex-HexNAc-HexNAc+Hex	Hex-Hex-Hex-Hex-(Hex-Hex-)Hex-HexNAc-HexNAc+Hex	Hex-Hex-Hex-(Hex-Hex-Hex-)Hex-HexNAc-HexNAc+Hex
					1121	1114	1082.44	1082.1	3	3243.27	20.08	859.252	-	-	No	0	1	201.97	0	0	FALSE	-	2-3-0-0-0		Hex-(Hex-)Hex-HexNAc-HexNAc+Hex
					1123	1114	795.693	795.693	3	2384.06	20.09	693.751	-	-	No	0	1	113.16	0	0	FALSE	-	2-3-0-0-0		Hex-(Hex-)Hex-HexNAc-HexNAc+Hex
					1126	1125	667.068	666.818	4	2663.24	20.12	627.301	-	-	No	0	1	105.8	0	0	FALSE	-	2-3-1-0-0		Hex-(Hex-)Hex-HexNAc-(DeHex-)HexNAc+Hex
					1128	1125	972.4	972.064	3	2913.17	20.13	870.285	-	-	No	1	0.86	202.58	117.64	-1	TRUE	-	2-6-0-0-0	0-1-0-0-0	Hex-Hex-Hex-(Hex-)Hex-HexNAc-HexNAc+HexNAc1	Hex-Hex-(Hex-Hex-)Hex-HexNAc-HexNAc+HexNAc1
					1130	1125	687.806	687.806	2	1373.6	20.14	541.258	-	-	No	0	1	110.33	0	0	FALSE	-	2-3-1-0-0		Hex-(Hex-)Hex-HexNAc-(DeHex-)HexNAc+Hex	Hex-(Hex-)Hex-HexNAc-HexNAc+Hex
					1132	1125	700.374	700.374	2	1398.73	20.15	478.002	-	-	No	0	1	95.78	0	0	FALSE	-	2-3-0-0-0		Hex-(Hex-)Hex-HexNAc-HexNAc+Hex
					1137	1136	812.63	812.295	3	2433.86	20.18	777.613	-	-	No	0	1	100.15	0	0	FALSE	-	2-3-0-0-0		Hex-(Hex-)Hex-HexNAc-HexNAc+Hex
					1139	1136	733.541	733.286	4	2929.11	20.19	747.314	-	-	No	0	1	174.12	0	0	FALSE	-	2-3-0-0-0		Hex-(Hex-)Hex-HexNAc-HexNAc+Hex	Hex-(Hex-)Hex-HexNAc-(DeHex-)HexNAc+Hex
					1141	1136	977.72	977.385	3	2929.14	20.21	959.407	-	-	No	0	1	235.96	0	0	FALSE	-	2-3-1-0-0		Hex-(Hex-)Hex-HexNAc-(DeHex-)HexNAc+Hex	Hex-(Hex-)Hex-HexNAc-HexNAc+Hex
					1143	1136	1015.07	1014.4	3	3040.18	20.22	771.666	-	-	No	0	1	301.97	0	0	FALSE	-	2-3-0-0-0		Hex-(Hex-)Hex-HexNAc-HexNAc+Hex	Hex-(Hex-)Hex-HexNAc-(DeHex-)HexNAc+Hex
					1145	1136	788.898	788.4	2	1574.79	20.23	736.152	-	-	No	0	1	100.62	0	0	FALSE	-	2-3-0-0-0		Hex-(Hex-)Hex-HexNAc-HexNAc+Hex
					1148	1147	940.073	939.739	3	2816.2	20.25	560.737	-	-	No	0	1	100.84	2.03	0	FALSE	-	4-3-3-0-0		DeHex-HexNAc-(DeHex-HexNAc-)Hex-(Hex-)Hex-HexNAc-(DeHex-)HexNAc+Hex	DeHex-HexNAc-Hex-(DeHex-HexNAc-Hex-)Hex-HexNAc-(DeHex-)HexNAc+Hex
					1150	1147	690.812	690.812	2	1379.61	20.26	400.437	-	-	No	0	1	15.9	0	0	FALSE	-	2-3-1-0-0		Hex-(Hex-)Hex-HexNAc-(DeHex-)HexNAc+Hex	Hex-(Hex-)Hex-HexNAc-HexNAc+Hex
					1152	1147	770.372	769.706	3	2306.1	20.27	616.593	-	-	No	0	1	110.24	0	0	FALSE	-	2-3-0-0-0		Hex-(Hex-)Hex-HexNAc-HexNAc+Hex
					1154	1147	659.297	658.798	4	2631.16	20.29	447.864	-	-	No	0	1	111.39	23.21	0	FALSE	-	3-3-2-0-0		DeHex-HexNAc-Hex-(Hex-)Hex-HexNAc-(DeHex-)HexNAc+Hex
					1156	1147	1028.42	1028.09	3	3081.25	20.3	859.299	-	-	No	0	1	186.17	23.26	0	FALSE	-	2-6-0-0-0		Hex-Hex-Hex-(Hex-Hex-)Hex-HexNAc-HexNAc+Hex	Hex-Hex-Hex-Hex-(Hex-)Hex-HexNAc-HexNAc+Hex	Hex-Hex-(Hex-Hex-Hex-)Hex-HexNAc-HexNAc+Hex
					1159	1158	669.681	669.347	3	2005.02	20.33	568.957	-	-	No	0	1	112.41	0	0	FALSE	-	2-3-0-0-0		Hex-(Hex-)Hex-HexNAc-HexNAc+Hex
					1161	1158	784.847	784.847	2	1567.68	20.34	728.4	-	-	No	0	1	101.25	0	0	FALSE	-	2-3-0-0-0		Hex-(Hex-)Hex-HexNAc-HexNAc+Hex
					1163	1158	944.756	944.418	3	2830.23	20.35	533.581	-	-	No	0	1	57.07	113.92	0	FALSE	-	4-4-0-0-0		Hex-(HexNAc-)Hex-(HexNAc-Hex-)Hex-HexNAc-HexNAc+Hex	Hex-Hex-(HexNAc-(HexNAc-)Hex-)Hex-HexNAc-HexNAc+Hex
					1165	1158	678.298	678.298	2	1354.58	20.36	652.314	-	-	No	0	1	63.43	0	0	FALSE	-	2-3-0-0-0		Hex-(Hex-)Hex-HexNAc-HexNAc+Hex
					1167	1158	830.051	829.718	3	2486.13	20.38	656.693	-	-	No	1	1	208.92	37.37	-1	TRUE	-	2-6-0-0-0	0-1-0-0-0	Hex-Hex-Hex-(Hex-)Hex-HexNAc-HexNAc+HexNAc1	Hex-Hex-(Hex-Hex-)Hex-HexNAc-HexNAc+HexNAc1
					1170	1169	800.385	799.877	2	1597.74	20.4	478.002	-	-	No	0	1	46.99	0	0	FALSE	-	2-3-0-0-0		Hex-(Hex-)Hex-HexNAc-HexNAc+Hex
					1174	1169	695.659	695.659	3	2083.96	20.43	643.596	-	-	No	0	1	102.29	0	0	FALSE	-	2-3-0-0-0		Hex-(Hex-)Hex-HexNAc-HexNAc+Hex	Hex-(Hex-)Hex-HexNAc-(DeHex-)HexNAc+Hex
					1176	1169	1025.43	1024.94	2	2047.86	20.44	1007.73	-	-	No	0	1	108.45	0	0	FALSE	-	2-3-0-0-0		Hex-(Hex-)Hex-HexNAc-HexNAc+Hex
					1178	1169	844.386	844.386	2	1686.76	20.45	826.678	-	-	No	0	1	105.38	0	0	FALSE	-	2-3-0-0-0		Hex-(Hex-)Hex-HexNAc-HexNAc+Hex
					1183	1180	974.735	974.07	3	2919.19	20.49	859.289	-	-	No	0	1	174.43	6.3	0	FALSE	-	2-5-0-0-0		Hex-Hex-(Hex-Hex-)Hex-HexNAc-HexNAc+Hex	Hex-Hex-Hex-(Hex-)Hex-HexNAc-HexNAc+Hex
					1185	1180	657.297	657.297	3	1968.87	20.5	303.631	-	-	No	0	1	2.36	101.05	0	FALSE	-	2-5-0-0-0		Hex-Hex-Hex-(Hex-)Hex-HexNAc-HexNAc+Hex	Hex-Hex-(Hex-Hex-)Hex-HexNAc-HexNAc+Hex
					1187	1180	1008.97	1008.47	2	2014.93	20.51	859.394	-	-	No	0	1	101.44	0	0	FALSE	-	2-3-0-0-0		Hex-(Hex-)Hex-HexNAc-HexNAc+Hex
					1189	1180	864.728	864.055	3	2589.14	20.52	386.529	-	-	No	0	1	81.89	106.77	0	FALSE	-	3-6-0-0-0		HexNAc-(Hex-)Hex-(Hex-Hex-Hex-)Hex-HexNAc-HexNAc+Hex	Hex-HexNAc-Hex-(Hex-(Hex-)Hex-)Hex-HexNAc-HexNAc+Hex	Hex-Hex-(Hex-)Hex-(HexNAc-Hex-)Hex-HexNAc-HexNAc+Hex	Hex-HexNAc-Hex-(Hex-Hex-Hex-)Hex-HexNAc-HexNAc+Hex	Hex-(Hex-)Hex-(HexNAc-(Hex-)Hex-)Hex-HexNAc-HexNAc+Hex	Hex-(Hex-)Hex-(Hex-HexNAc-Hex-)Hex-HexNAc-HexNAc+Hex	Hex-Hex-Hex-Hex-(HexNAc-Hex-)Hex-HexNAc-HexNAc+Hex	Hex-Hex-Hex-(HexNAc-(Hex-)Hex-)Hex-HexNAc-HexNAc+Hex	Hex-Hex-Hex-(Hex-HexNAc-Hex-)Hex-HexNAc-HexNAc+Hex	Hex-HexNAc-(Hex-)Hex-(Hex-Hex-)Hex-HexNAc-HexNAc+Hex	HexNAc-(Hex-Hex-)Hex-(Hex-Hex-)Hex-HexNAc-HexNAc+Hex	HexNAc-(Hex-)Hex-(Hex-(Hex-)Hex-)Hex-HexNAc-HexNAc+Hex	Hex-(Hex-Hex-)Hex-(HexNAc-Hex-)Hex-HexNAc-HexNAc+Hex
					1192	1191	672.984	672.319	3	2013.93	20.54	521.959	-	-	No	0	1	130.54	0	0	FALSE	-	2-3-0-0-0		Hex-(Hex-)Hex-HexNAc-HexNAc+Hex	Hex-(Hex-)Hex-HexNAc-(DeHex-)HexNAc+Hex
					1194	1191	898.405	898.405	2	1794.8	20.56	880.579	-	-	No	0	1	2.63	0	0	FALSE	-	2-3-0-0-0		Hex-(Hex-)Hex-HexNAc-HexNAc+Hex
					1196	1191	665.779	665.779	2	1329.54	20.57	554.769	-	-	No	0	1	116.02	0	0	FALSE	-	2-3-0-0-0		Hex-(Hex-)Hex-HexNAc-HexNAc+Hex
					1198	1191	1282.07	1281.58	2	2561.14	20.58	450.726	-	-	No	0	0.98	59.13	159.67	-1	TRUE	-	2-9-0-0-0	0-1-0-0-0	Hex-Hex-Hex-(Hex-Hex-Hex-Hex-)Hex-HexNAc-HexNAc+HexNAc1	Hex-Hex-Hex-Hex-Hex-(Hex-Hex-)Hex-HexNAc-HexNAc+HexNAc1	Hex-Hex-Hex-Hex-Hex-Hex-(Hex-)Hex-HexNAc-HexNAc+HexNAc1	Hex-Hex-Hex-Hex-(Hex-Hex-Hex-)Hex-HexNAc-HexNAc+HexNAc1
					1200	1191	1461.11	1460.6	2	2919.18	20.59	516.237	-	-	No	0	1	4	118.58	0	FALSE	-	3-5-1-0-0		Hex-(Hex-)Hex-(HexNAc-Hex-)Hex-HexNAc-(DeHex-)HexNAc+Hex	Hex-Hex-Hex-(HexNAc-Hex-)Hex-HexNAc-(DeHex-)HexNAc+Hex	Hex-Hex-(Hex-HexNAc-Hex-)Hex-HexNAc-(DeHex-)HexNAc+Hex	Hex-Hex-(HexNAc-(Hex-)Hex-)Hex-HexNAc-(DeHex-)HexNAc+Hex
					1203	1202	779.351	779.101	4	3112.38	20.61	505.203	-	-	No	0	1	4.61	103.51	0	FALSE	-	3-4-2-0-0		Hex-Hex-(DeHex-HexNAc-Hex-)Hex-HexNAc-(DeHex-)HexNAc+Hex
					1205	1202	815.868	815.868	2	1629.72	20.62	478.3	-	-	No	0	1	38.53	0	0	FALSE	-	2-3-0-0-0		Hex-(Hex-)Hex-HexNAc-HexNAc+Hex
					1207	1202	746.336	745.833	2	1489.65	20.63	736.258	-	-	No	0	1	103.87	0	0	FALSE	-	2-3-0-0-0		Hex-(Hex-)Hex-HexNAc-HexNAc+Hex
					1209	1202	895.437	895.104	3	2682.29	20.65	1099.88	-	-	No	0	1	103.35	0	0	FALSE	-	2-3-0-0-0		Hex-(Hex-)Hex-HexNAc-HexNAc+Hex
					1211	1202	1170.75	1170.5	4	4677.99	20.66	1390.26	-	-	No	0	1	131.69	0	0	FALSE	-	2-3-1-0-0		Hex-(Hex-)Hex-HexNAc-(DeHex-)HexNAc+Hex	Hex-(Hex-)Hex-HexNAc-HexNAc+Hex
					1214	1213	702.988	702.327	3	2103.96	20.68	667.761	-	-	No	0	1	133.19	0	0	FALSE	-	2-3-0-0-0		Hex-(Hex-)Hex-HexNAc-HexNAc+Hex
					1216	1213	771.41	771.41	2	1540.81	20.69	698.649	-	-	No	0	1	123.61	0	0	FALSE	-	2-3-0-0-0		Hex-(Hex-)Hex-HexNAc-HexNAc+Hex
					1218	1213	661.809	661.809	2	1321.6	20.7	386.529	-	-	No	0	1	10.19	0	0	FALSE	-	2-3-0-0-0		Hex-(Hex-)Hex-HexNAc-HexNAc+Hex
					1220	1213	1038.99	1038.49	2	2074.96	20.71	971.249	-	-	No	0	1	164.87	0	0	FALSE	-	2-3-0-0-0		Hex-(Hex-)Hex-HexNAc-HexNAc+Hex
					1225	1224	754.998	754.664	3	2260.97	20.75	560.737	-	-	No	0	1	123.11	0	0	FALSE	-	2-3-0-0-0		Hex-(Hex-)Hex-HexNAc-HexNAc+Hex
					1227	1224	1299.16	1298.15	3	3891.44	20.76	1246.08	-	-	No	0	1	9.93	195.9	0	FALSE	-	3-4-2-0-0		Hex-Hex-(DeHex-HexNAc-Hex-)Hex-HexNAc-(DeHex-)HexNAc+Hex
					1229	1224	886.379	886.04	3	2655.1	20.78	573.265	-	-	No	0	1	43.18	106.15	0	FALSE	-	3-5-0-0-0		HexNAc-Hex-Hex-Hex-(Hex-)Hex-HexNAc-HexNAc+Hex	Hex-Hex-Hex-(HexNAc-Hex-)Hex-HexNAc-HexNAc+Hex
					1236	1235	750.35	750.35	2	1498.68	20.82	453.252	-	-	No	0	1	122.76	0	0	FALSE	-	2-3-0-0-0		Hex-(Hex-)Hex-HexNAc-HexNAc+Hex	Hex-(Hex-)Hex-HexNAc-(DeHex-)HexNAc+Hex
					1238	1235	735.32	734.987	3	2201.94	20.84	612.636	-	-	No	0	1	135.1	0.51	0	FALSE	-	3-3-0-0-0		HexNAc-Hex-(Hex-)Hex-HexNAc-HexNAc+Hex	Hex-(HexNAc-Hex-)Hex-HexNAc-HexNAc+Hex
					1240	1235	917.066	916.735	3	2747.18	20.85	625.309	-	-	No	0	1	18.04	141.71	0	FALSE	-	4-3-1-0-0		DeHex-HexNAc-(HexNAc-)Hex-(Hex-)Hex-HexNAc-HexNAc+Hex	DeHex-HexNAc-Hex-(HexNAc-Hex-)Hex-HexNAc-HexNAc+Hex
					1244	1235	1201.04	1200.55	2	2399.08	20.87	531.914	-	-	No	0	0.86	113.88	169.52	-1	TRUE	-	2-7-0-0-0	0-1-0-0-0	Hex-Hex-Hex-Hex-(Hex-)Hex-HexNAc-HexNAc+HexNAc1	Hex-Hex-Hex-(Hex-Hex-)Hex-HexNAc-HexNAc+HexNAc1	Hex-Hex-(Hex-Hex-Hex-)Hex-HexNAc-HexNAc+HexNAc1
					1247	1246	655.304	654.633	3	1960.88	20.9	602.666	-	-	No	0	1	135.83	0	0	FALSE	-	2-3-0-0-0		Hex-(Hex-)Hex-HexNAc-HexNAc+Hex
					1249	1246	914.921	914.921	2	1827.83	20.91	545.314	-	-	No	0	1	76.65	0	0	FALSE	-	2-3-0-0-0		Hex-(Hex-)Hex-HexNAc-HexNAc+Hex
					1251	1246	775.701	775.368	3	2323.08	20.92	656.673	-	-	No	0	1	191.4	0	0	FALSE	-	2-3-0-0-0		Hex-(Hex-)Hex-HexNAc-HexNAc+Hex
					1253	1246	987.096	987.096	3	2958.26	20.94	932.195	-	-	No	0	0.97	15.51	100	-1	TRUE	-	4-3-0-0-0	1-0-0-0-0	HexNAc-Hex-(Hex-)Hex-HexNAc-HexNAc+Hex1	Hex-(HexNAc-Hex-)Hex-HexNAc-HexNAc+Hex1
					1255	1246	1244.46	1244.46	3	3730.37	20.95	1042.6	-	-	No	0	1	28.49	196.58	-1	TRUE	-	6-3-1-0-0	1-0-0-0-0	HexNAc-(HexNAc-)Hex-(HexNAc-Hex-)Hex-HexNAc-(DeHex-)HexNAc+Hex1	HexNAc-Hex-(HexNAc-(HexNAc-)Hex-)Hex-HexNAc-(DeHex-)HexNAc+Hex1
					1258	1257	794.032	793.698	3	2378.07	20.97	692.818	-	-	No	0	1	102.51	0	0	FALSE	-	2-3-1-0-0		Hex-(Hex-)Hex-HexNAc-(DeHex-)HexNAc+Hex	Hex-(Hex-)Hex-HexNAc-HexNAc+Hex
					1260	1257	1338.55	1338.55	2	2675.08	20.98	507.267	-	-	No	0	1	13.29	131.57	0	FALSE	-	2-8-0-0-0		Hex-Hex-Hex-(Hex-Hex-Hex-Hex-)Hex-HexNAc-HexNAc+Hex	Hex-Hex-Hex-Hex-Hex-(Hex-Hex-)Hex-HexNAc-HexNAc+Hex	Hex-Hex-Hex-Hex-Hex-Hex-(Hex-)Hex-HexNAc-HexNAc+Hex	Hex-Hex-Hex-Hex-(Hex-Hex-Hex-)Hex-HexNAc-HexNAc+Hex
					1262	1257	977.763	977.763	3	2930.27	21	716.128	-	-	No	0	1	177.81	270.21	-1	TRUE	-	2-8-0-0-0	0-1-0-0-0	Hex-Hex-Hex-Hex-Hex-(Hex-)Hex-HexNAc-HexNAc+HexNAc1	Hex-Hex-Hex-Hex-(Hex-Hex-)Hex-HexNAc-HexNAc+HexNAc1	Hex-Hex-Hex-(Hex-Hex-Hex-)Hex-HexNAc-HexNAc+HexNAc1
					1264	1257	848.412	847.739	3	2540.2	21.01	747.589	-	-	No	0	1	111.46	0	0	FALSE	-	2-3-0-0-0		Hex-(Hex-)Hex-HexNAc-HexNAc+Hex
					1266	1257	784.087	783.583	4	3130.3	21.02	501.565	-	-	No	0	1	101.13	1.48	0	FALSE	-	3-4-2-0-0		DeHex-HexNAc-(Hex-)Hex-(Hex-)Hex-HexNAc-(DeHex-)HexNAc+Hex	DeHex-HexNAc-Hex-(Hex-Hex-)Hex-HexNAc-(DeHex-)HexNAc+Hex
					1269	1268	907.943	907.443	2	1812.87	21.04	854.739	-	-	No	0	1	124.43	0	0	FALSE	-	2-3-0-0-0		Hex-(Hex-)Hex-HexNAc-HexNAc+Hex
					1271	1268	893.033	892.697	3	2675.07	21.06	866.817	-	-	No	0	1	109.8	0	0	FALSE	-	2-3-1-0-0		Hex-(Hex-)Hex-HexNAc-(DeHex-)HexNAc+Hex
					1273	1268	837.352	837.352	3	2509.03	21.07	400.437	-	-	No	0	0.98	13.54	104.8	-3	TRUE	-	4-5-0-1-0	2-0-0-1-0	Hex-Hex-Hex-(Hex-)Hex-HexNAc-HexNAc+Hex2NeuAc1	Hex-Hex-(Hex-Hex-)Hex-HexNAc-HexNAc+Hex2NeuAc1
					1277	1268	1254.49	1253.99	2	2505.96	21.09	845.483	-	-	No	0	1	151.65	0	0	FALSE	-	2-3-0-0-0		Hex-(Hex-)Hex-HexNAc-HexNAc+Hex
					1280	1279	1173.46	1172.96	2	2343.9	21.12	845.519	-	-	No	0	1	139.36	0	0	FALSE	-	2-3-0-0-0		Hex-(Hex-)Hex-HexNAc-HexNAc+Hex
					1284	1279	757.662	756.991	3	2267.95	21.14	556.927	-	-	No	0	1	143.1	0	0	FALSE	-	2-3-0-0-0		Hex-(Hex-)Hex-HexNAc-HexNAc+Hex	Hex-(Hex-)Hex-HexNAc-(DeHex-)HexNAc+Hex
					1286	1279	957.461	957.461	2	1912.91	21.16	904.777	-	-	No	0	1	112.13	0	0	FALSE	-	2-3-1-0-0		Hex-(Hex-)Hex-HexNAc-(DeHex-)HexNAc+Hex	Hex-(Hex-)Hex-HexNAc-HexNAc+Hex
					1288	1279	1349.54	1349.54	2	2697.06	21.17	681.351	-	-	No	0	1	165.58	189.87	0	FALSE	-	2-6-0-0-0		Hex-Hex-Hex-Hex-(Hex-)Hex-HexNAc-HexNAc+Hex	Hex-Hex-Hex-(Hex-Hex-)Hex-HexNAc-HexNAc+Hex	Hex-Hex-(Hex-Hex-Hex-)Hex-HexNAc-HexNAc+Hex
					1293	1290	797.353	797.353	2	1592.69	21.2	745.149	-	-	No	0	1	100.3	0	0	FALSE	-	2-3-0-0-0		Hex-(Hex-)Hex-HexNAc-HexNAc+Hex
					1295	1290	729.317	729.317	2	1456.62	21.21	591.972	-	-	No	0	1	5.02	0	0	FALSE	-	2-3-0-0-0		Hex-(Hex-)Hex-HexNAc-HexNAc+Hex
					1297	1290	807.42	806.747	3	2417.22	21.23	754.178	-	-	No	0	1	111.92	0	0	FALSE	-	2-3-0-0-0		Hex-(Hex-)Hex-HexNAc-HexNAc+Hex
					1299	1290	880.398	879.894	2	1757.77	21.24	847.513	-	-	No	0	1	2.54	0	0	FALSE	-	2-3-0-0-0		Hex-(Hex-)Hex-HexNAc-HexNAc+Hex
					1302	1301	692.812	692.812	2	1383.61	21.26	658.011	-	-	No	0	1	101.29	0	0	FALSE	-	2-3-0-0-0		Hex-(Hex-)Hex-HexNAc-HexNAc+Hex
					1304	1301	925.413	924.914	2	1847.81	21.27	606.625	-	-	No	0	1	106.68	0	0	FALSE	-	2-3-1-0-0		Hex-(Hex-)Hex-HexNAc-(DeHex-)HexNAc+Hex	Hex-(Hex-)Hex-HexNAc-HexNAc+Hex
					1306	1301	723.837	723.837	2	1445.66	21.29	714.746	-	-	No	0	1	81.73	0	0	FALSE	-	2-3-0-0-0		Hex-(Hex-)Hex-HexNAc-HexNAc+Hex
					1308	1301	767.382	767.382	2	1532.75	21.3	451.876	-	-	No	0	1	101.2	0	0	FALSE	-	2-3-0-0-0		Hex-(Hex-)Hex-HexNAc-HexNAc+Hex	Hex-(Hex-)Hex-HexNAc-(DeHex-)HexNAc+Hex
					1313	1312	707.322	707.322	3	2118.94	21.34	697.836	-	-	No	0	1	135.3	0	0	FALSE	-	2-3-1-0-0		Hex-(Hex-)Hex-HexNAc-(DeHex-)HexNAc+Hex
					1315	1312	712.306	712.306	4	2845.2	21.35	456.879	-	-	No	0	1	100.52	2.98	0	FALSE	-	5-4-0-0-0		HexNAc-Hex-HexNAc-Hex-(HexNAc-Hex-)Hex-HexNAc-HexNAc+Hex	Hex-HexNAc-(HexNAc-)Hex-(HexNAc-Hex-)Hex-HexNAc-HexNAc+Hex	HexNAc-(HexNAc-)Hex-(Hex-(HexNAc-)Hex-)Hex-HexNAc-HexNAc+Hex	HexNAc-(Hex-)Hex-(HexNAc-(HexNAc-)Hex-)Hex-HexNAc-HexNAc+Hex	Hex-HexNAc-Hex-(HexNAc-(HexNAc-)Hex-)Hex-HexNAc-HexNAc+Hex	HexNAc-Hex-HexNAc-(HexNAc-)Hex-(Hex-)Hex-HexNAc-HexNAc+Hex
					1317	1312	698.313	698.313	3	2091.92	21.36	541.258	-	-	No	0	1	101.43	0	0	FALSE	-	2-3-1-0-0		Hex-(Hex-)Hex-HexNAc-(DeHex-)HexNAc+Hex	Hex-(Hex-)Hex-HexNAc-HexNAc+Hex
					1319	1312	671.287	670.955	3	2009.84	21.38	636.292	-	-	No	0	1	100.81	0	0	FALSE	-	2-3-0-0-0		Hex-(Hex-)Hex-HexNAc-HexNAc+Hex
					1321	1312	802.873	802.873	2	1603.73	21.39	874.543	-	-	No	0	1	119.01	0	0	FALSE	-	2-3-0-0-0		Hex-(Hex-)Hex-HexNAc-HexNAc+Hex
					1326	1323	1257.52	1257.52	2	2513.03	21.42	507.267	-	-	No	0	1	22.04	126.94	0	FALSE	-	2-7-0-0-0		Hex-Hex-Hex-Hex-Hex-(Hex-)Hex-HexNAc-HexNAc+Hex	Hex-Hex-Hex-Hex-(Hex-Hex-)Hex-HexNAc-HexNAc+Hex	Hex-Hex-Hex-(Hex-Hex-Hex-)Hex-HexNAc-HexNAc+Hex
					1328	1323	715.658	715.658	3	2143.95	21.44	606.625	-	-	No	0	1	119.13	0	0	FALSE	-	2-3-0-0-0		Hex-(Hex-)Hex-HexNAc-HexNAc+Hex	Hex-(Hex-)Hex-HexNAc-(DeHex-)HexNAc+Hex
					1330	1323	1289.53	1289.53	2	2577.03	21.45	875.474	-	-	No	0	1	120.43	0	0	FALSE	-	2-3-0-0-0		Hex-(Hex-)Hex-HexNAc-HexNAc+Hex
					1332	1323	994.427	994.097	3	2979.27	21.46	903.364	-	-	No	0	1	154.12	11	0	FALSE	-	2-5-0-0-0		Hex-Hex-(Hex-Hex-)Hex-HexNAc-HexNAc+Hex	Hex-Hex-Hex-(Hex-)Hex-HexNAc-HexNAc+Hex
					1335	1334	681.336	681.336	2	1360.66	21.48	672.621	-	-	No	0	1	108.64	0	0	FALSE	-	2-3-0-0-0		Hex-(Hex-)Hex-HexNAc-HexNAc+Hex
					1337	1334	1032.81	1032.47	3	3094.39	21.5	1000.75	-	-	No	0	0.99	11.79	100	-1	TRUE	-	4-3-0-0-0	1-0-0-0-0	HexNAc-Hex-(Hex-)Hex-HexNAc-HexNAc+Hex1	Hex-(HexNAc-Hex-)Hex-HexNAc-HexNAc+Hex1
					1341	1334	653.36	653.36	4	2609.41	21.52	626.858	-	-	No	0	1	104.24	0	0	FALSE	-	2-3-1-0-0		Hex-(Hex-)Hex-HexNAc-(DeHex-)HexNAc+Hex
					1343	1334	810.36	810.03	3	2427.07	21.53	451.876	-	-	No	0	1	21.65	181.39	-1	TRUE	-	3-6-1-0-0	0-1-0-0-0	DeHex-HexNAc-Hex-(Hex-Hex-Hex-)Hex-HexNAc-HexNAc+HexNAc1	DeHex-HexNAc-Hex-(Hex-(Hex-)Hex-)Hex-HexNAc-HexNAc+HexNAc1	DeHex-HexNAc-(Hex-)Hex-(Hex-Hex-)Hex-HexNAc-HexNAc+HexNAc1	DeHex-HexNAc-(Hex-Hex-)Hex-(Hex-)Hex-HexNAc-HexNAc+HexNAc1
					1346	1345	706.315	705.813	4	2819.22	21.55	432.53	-	-	No	0	1	86.4	181.34	0	FALSE	-	3-4-0-0-0		HexNAc-(Hex-)Hex-(Hex-)Hex-HexNAc-HexNAc+Hex	Hex-HexNAc-Hex-(Hex-)Hex-HexNAc-HexNAc+Hex	HexNAc-Hex-(Hex-Hex-)Hex-HexNAc-HexNAc+Hex
					1348	1345	882.346	882.346	3	2644.01	21.57	812.696	-	-	No	0	1	100.63	0	0	FALSE	-	2-3-0-0-0		Hex-(Hex-)Hex-HexNAc-HexNAc+Hex
					1350	1345	910.369	910.12	4	3636.45	21.58	738.878	-	-	No	0	1	175.58	16.3	0	FALSE	-	2-4-1-0-0		Hex-(Hex-Hex-)Hex-HexNAc-(DeHex-)HexNAc+Hex	Hex-Hex-(Hex-)Hex-HexNAc-(DeHex-)HexNAc+Hex
					1352	1345	749.375	749.042	3	2244.1	21.59	591.273	-	-	No	0	1	104.11	0	0	FALSE	-	2-3-1-0-0		Hex-(Hex-)Hex-HexNAc-(DeHex-)HexNAc+Hex	Hex-(Hex-)Hex-HexNAc-HexNAc+Hex
					1354	1345	719.382	719.382	2	1436.75	21.61	684.839	-	-	No	0	1	105.3	0	0	FALSE	-	2-3-0-0-0		Hex-(Hex-)Hex-HexNAc-HexNAc+Hex
					1357	1356	1176.99	1176.49	2	2350.97	21.63	324.65	-	-	No	0	1	154.33	0	0	FALSE	-	2-3-0-0-0		Hex-(Hex-)Hex-HexNAc-HexNAc+Hex
					1359	1356	951.713	951.713	3	2852.12	21.65	916.849	-	-	No	0	1	100.43	0	0	FALSE	-	2-3-0-0-0		Hex-(Hex-)Hex-HexNAc-HexNAc+Hex
					1361	1356	1353.55	1352.54	2	2703.06	21.66	324.65	-	-	No	0	1	17.65	116.86	0	FALSE	-	3-6-0-1-0		NeuAc-Hex-HexNAc-Hex-(Hex-Hex-Hex-)Hex-HexNAc-HexNAc+Hex	NeuAc-Hex-HexNAc-(Hex-)Hex-(Hex-Hex-)Hex-HexNAc-HexNAc+Hex	Hex-(Hex-)Hex-(NeuAc-Hex-HexNAc-Hex-)Hex-HexNAc-HexNAc+Hex	NeuAc-Hex-HexNAc-Hex-(Hex-(Hex-)Hex-)Hex-HexNAc-HexNAc+Hex
					1363	1356	826.338	826.338	2	1650.66	21.67	450.726	-	-	No	0	1	43.65	0	-3	TRUE	-	3-4-1-0-0	1-1-1-0-0	Hex-(Hex-)Hex-HexNAc-HexNAc+Hex1HexNAc1DeHex1
					1365	1356	819.372	819.372	2	1636.73	21.69	767.178	-	-	No	0	1	100.83	0	0	FALSE	-	2-3-0-0-0		Hex-(Hex-)Hex-HexNAc-HexNAc+Hex
					1368	1367	737.359	737.108	4	2944.4	21.71	386.529	-	-	No	0	1	2.34	111.69	0	FALSE	-	4-7-0-0-0		HexNAc-Hex-Hex-(Hex-)Hex-(Hex-HexNAc-Hex-)Hex-HexNAc-HexNAc+Hex	HexNAc-Hex-Hex-Hex-(Hex-HexNAc-(Hex-)Hex-)Hex-HexNAc-HexNAc+Hex	Hex-HexNAc-Hex-Hex-(Hex-)Hex-(HexNAc-Hex-)Hex-HexNAc-HexNAc+Hex	HexNAc-Hex-Hex-(Hex-Hex-)Hex-(HexNAc-Hex-)Hex-HexNAc-HexNAc+Hex	HexNAc-Hex-Hex-(Hex-)Hex-(HexNAc-(Hex-)Hex-)Hex-HexNAc-HexNAc+Hex	HexNAc-Hex-Hex-Hex-(HexNAc-(Hex-Hex-)Hex-)Hex-HexNAc-HexNAc+Hex	Hex-HexNAc-Hex-Hex-Hex-(Hex-HexNAc-Hex-)Hex-HexNAc-HexNAc+Hex	Hex-HexNAc-Hex-Hex-Hex-(HexNAc-(Hex-)Hex-)Hex-HexNAc-HexNAc+Hex
					1370	1367	788.856	788.353	2	1574.69	21.72	409.255	-	-	No	0	1	153.47	0	0	FALSE	-	2-3-1-0-0		Hex-(Hex-)Hex-HexNAc-(DeHex-)HexNAc+Hex
					1372	1367	832.328	831.996	3	2492.97	21.73	590.263	-	-	No	0	1	118.01	0	0	FALSE	-	2-3-0-0-0		Hex-(Hex-)Hex-HexNAc-HexNAc+Hex	Hex-(Hex-)Hex-HexNAc-(DeHex-)HexNAc+Hex
					1374	1367	982.812	982.477	3	2944.41	21.75	869.306	-	-	No	0	1	123.93	0	0	FALSE	-	2-3-0-0-0		Hex-(Hex-)Hex-HexNAc-HexNAc+Hex
					1376	1367	1187.47	1187.47	2	2372.93	21.76	845.497	-	-	No	0	1	139.12	0	0	FALSE	-	2-3-0-0-0		Hex-(Hex-)Hex-HexNAc-HexNAc+Hex
					1379	1378	790.423	790.423	2	1578.83	21.78	481.482	-	-	No	0	1	96.99	0	0	FALSE	-	2-3-0-0-0		Hex-(Hex-)Hex-HexNAc-HexNAc+Hex
					1383	1378	1012.4	1011.73	3	3032.17	21.81	767.649	-	-	No	0	1	249.08	234.92	-1	TRUE	-	2-8-0-0-0	0-1-0-0-0	Hex-Hex-Hex-Hex-Hex-(Hex-)Hex-HexNAc-HexNAc+HexNAc1	Hex-Hex-Hex-Hex-(Hex-Hex-)Hex-HexNAc-HexNAc+HexNAc1	Hex-Hex-Hex-(Hex-Hex-Hex-)Hex-HexNAc-HexNAc+HexNAc1
					1385	1378	1020.44	1020.11	3	3057.3	21.82	1008.49	-	-	No	0	1	109.67	0	0	FALSE	-	2-3-1-0-0		Hex-(Hex-)Hex-HexNAc-(DeHex-)HexNAc+Hex
					1387	1378	927.372	926.87	2	1851.72	21.84	892.467	-	-	No	0	1	107.32	0	0	FALSE	-	2-3-1-0-0		Hex-(Hex-)Hex-HexNAc-(DeHex-)HexNAc+Hex	Hex-(Hex-)Hex-HexNAc-HexNAc+Hex
					1390	1389	781.358	780.347	2	1558.68	21.86	689.596	-	-	No	0	1	181.42	0	0	FALSE	-	2-3-0-0-0		Hex-(Hex-)Hex-HexNAc-HexNAc+Hex
					1392	1389	676.288	675.954	3	2024.84	21.87	641.459	-	-	No	0	1	100.38	0	0	FALSE	-	2-3-0-0-0		Hex-(Hex-)Hex-HexNAc-HexNAc+Hex
					1394	1389	813.38	813.043	3	2436.11	21.88	713.533	-	-	No	0	1	105.96	0	0	FALSE	-	2-3-0-0-0		Hex-(Hex-)Hex-HexNAc-HexNAc+Hex
					1396	1389	1213.49	1213.16	3	3636.46	21.89	1461.54	-	-	No	0	1	103.69	0	0	FALSE	-	2-3-1-0-0		Hex-(Hex-)Hex-HexNAc-(DeHex-)HexNAc+Hex
					1398	1389	947.935	947.935	2	1893.86	21.91	820.574	-	-	No	0	1	134.58	0	0	FALSE	-	2-3-0-0-0		Hex-(Hex-)Hex-HexNAc-HexNAc+Hex	Hex-(Hex-)Hex-HexNAc-(DeHex-)HexNAc+Hex
					1401	1400	690.384	690.384	2	1378.75	21.93	336.186	-	-	No	0	1	18.8	0	0	FALSE	-	2-3-0-0-0		Hex-(Hex-)Hex-HexNAc-HexNAc+Hex
					1405	1400	667.803	667.803	2	1333.59	21.95	658.717	-	-	No	0	1	41.98	0	0	FALSE	-	2-3-0-0-0		Hex-(Hex-)Hex-HexNAc-HexNAc+Hex
					1407	1400	650.983	650.648	3	1948.92	21.97	429.462	-	-	No	0	1	106.68	0	0	FALSE	-	2-3-0-0-0		Hex-(Hex-)Hex-HexNAc-HexNAc+Hex
					1412	1411	695.984	695.652	3	2083.93	22.01	670.553	-	-	No	0	1	106.04	0	0	FALSE	-	2-3-1-0-0		Hex-(Hex-)Hex-HexNAc-(DeHex-)HexNAc+Hex	Hex-(Hex-)Hex-HexNAc-HexNAc+Hex
					1414	1411	829.373	829.124	4	3312.47	22.02	591.273	-	-	No	0	1	2.88	105.69	0	FALSE	-	3-6-0-0-0		HexNAc-(Hex-)Hex-(Hex-(Hex-)Hex-)Hex-HexNAc-HexNAc+Hex	Hex-HexNAc-Hex-(Hex-(Hex-)Hex-)Hex-HexNAc-HexNAc+Hex	Hex-HexNAc-Hex-(Hex-Hex-Hex-)Hex-HexNAc-HexNAc+Hex	Hex-(Hex-Hex-)Hex-(HexNAc-Hex-)Hex-HexNAc-HexNAc+Hex	Hex-(Hex-)Hex-(HexNAc-(Hex-)Hex-)Hex-HexNAc-HexNAc+Hex	Hex-(Hex-)Hex-(Hex-HexNAc-Hex-)Hex-HexNAc-HexNAc+Hex	Hex-HexNAc-(Hex-)Hex-(Hex-Hex-)Hex-HexNAc-HexNAc+Hex	HexNAc-(Hex-Hex-)Hex-(Hex-Hex-)Hex-HexNAc-HexNAc+Hex	HexNAc-(Hex-)Hex-(Hex-Hex-Hex-)Hex-HexNAc-HexNAc+Hex
					1416	1411	686.836	686.836	2	1371.66	22.03	402.364	-	-	No	0	1	88.19	0	0	FALSE	-	2-3-0-0-0		Hex-(Hex-)Hex-HexNAc-HexNAc+Hex
					1418	1411	725.9	725.9	2	1449.79	22.04	590.263	-	-	No	0	1	107.11	0	0	FALSE	-	2-3-0-0-0		Hex-(Hex-)Hex-HexNAc-HexNAc+Hex
					1420	1411	974.735	973.729	3	2918.16	22.05	345.43	-	-	No	0	1	13.8	220.93	-1	TRUE	-	4-10-0-0-0	0-1-0-0-0	Hex-Hex-(Hex-HexNAc-)Hex-(Hex-HexNAc-Hex-Hex-Hex-)Hex-HexNAc-HexNAc+HexNAc1	Hex-HexNAc-(Hex-Hex-Hex-)Hex-(Hex-HexNAc-(Hex-)Hex-)Hex-HexNAc-HexNAc+HexNAc1	Hex-HexNAc-(Hex-Hex-)Hex-(Hex-HexNAc-(Hex-Hex-)Hex-)Hex-HexNAc-HexNAc+HexNAc1	Hex-HexNAc-(Hex-Hex-Hex-)Hex-(Hex-Hex-(HexNAc-)Hex-)Hex-HexNAc-HexNAc+HexNAc1	Hex-HexNAc-(Hex-Hex-)Hex-(Hex-Hex-Hex-(HexNAc-)Hex-)Hex-HexNAc-HexNAc+HexNAc1	Hex-HexNAc-(Hex-Hex-)Hex-(Hex-Hex-(Hex-HexNAc-)Hex-)Hex-HexNAc-HexNAc+HexNAc1	Hex-Hex-Hex-Hex-(HexNAc-)Hex-(Hex-HexNAc-(Hex-)Hex-)Hex-HexNAc-HexNAc+HexNAc1	Hex-Hex-Hex-(HexNAc-)Hex-(Hex-HexNAc-(Hex-Hex-)Hex-)Hex-HexNAc-HexNAc+HexNAc1	Hex-Hex-(Hex-HexNAc-)Hex-(Hex-HexNAc-(Hex-Hex-)Hex-)Hex-HexNAc-HexNAc+HexNAc1	Hex-HexNAc-Hex-Hex-(Hex-HexNAc-)Hex-(Hex-Hex-Hex-)Hex-HexNAc-HexNAc+HexNAc1	Hex-HexNAc-Hex-Hex-(HexNAc-)Hex-(Hex-Hex-(Hex-)Hex-)Hex-HexNAc-HexNAc+HexNAc1	Hex-HexNAc-Hex-Hex-(HexNAc-)Hex-(Hex-(Hex-Hex-)Hex-)Hex-HexNAc-HexNAc+HexNAc1	Hex-HexNAc-Hex-Hex-(HexNAc-)Hex-(Hex-Hex-Hex-Hex-)Hex-HexNAc-HexNAc+HexNAc1	HexNAc-Hex-Hex-(Hex-HexNAc-)Hex-(Hex-Hex-(Hex-)Hex-)Hex-HexNAc-HexNAc+HexNAc1	HexNAc-Hex-Hex-(Hex-HexNAc-)Hex-(Hex-(Hex-Hex-)Hex-)Hex-HexNAc-HexNAc+HexNAc1	HexNAc-Hex-Hex-(Hex-HexNAc-)Hex-(Hex-Hex-Hex-Hex-)Hex-HexNAc-HexNAc+HexNAc1	HexNAc-Hex-Hex-(HexNAc-)Hex-(Hex-Hex-Hex-(Hex-)Hex-)Hex-HexNAc-HexNAc+HexNAc1	HexNAc-Hex-Hex-(HexNAc-)Hex-(Hex-Hex-(Hex-Hex-)Hex-)Hex-HexNAc-HexNAc+HexNAc1	HexNAc-Hex-Hex-(HexNAc-)Hex-(Hex-Hex-Hex-Hex-Hex-)Hex-HexNAc-HexNAc+HexNAc1	Hex-Hex-Hex-Hex-Hex-Hex-(HexNAc-)Hex-(HexNAc-Hex-)Hex-HexNAc-HexNAc+HexNAc1	Hex-Hex-Hex-(Hex-HexNAc-)Hex-(HexNAc-(Hex-Hex-)Hex-)Hex-HexNAc-HexNAc+HexNAc1	Hex-Hex-Hex-(Hex-HexNAc-)Hex-(Hex-HexNAc-(Hex-)Hex-)Hex-HexNAc-HexNAc+HexNAc1	Hex-Hex-Hex-Hex-(Hex-HexNAc-)Hex-(Hex-HexNAc-Hex-)Hex-HexNAc-HexNAc+HexNAc1	Hex-Hex-Hex-Hex-(Hex-HexNAc-)Hex-(HexNAc-(Hex-)Hex-)Hex-HexNAc-HexNAc+HexNAc1	Hex-HexNAc-Hex-HexNAc-(Hex-Hex-Hex-Hex-)Hex-(Hex-)Hex-HexNAc-HexNAc+HexNAc1
					1423	1422	955.808	955.479	3	2863.41	22.07	743.666	-	-	No	0	1	200.46	0	0	FALSE	-	2-3-1-0-0		Hex-(Hex-)Hex-HexNAc-(DeHex-)HexNAc+Hex
					1425	1422	1037.45	1036.78	3	3107.32	22.09	450.726	-	-	No	0	1	2.53	123.12	0	FALSE	-	4-4-3-0-0		Hex-(DeHex-)HexNAc-Hex-(DeHex-HexNAc-Hex-)Hex-HexNAc-(DeHex-)HexNAc+Hex	Hex-(DeHex-)HexNAc-(DeHex-HexNAc-)Hex-(Hex-)Hex-HexNAc-(DeHex-)HexNAc+Hex
					1427	1422	1099.44	1099.1	3	3294.29	22.1	979.829	-	-	No	1	0.97	168.6	36.33	0	FALSE	-	2-7-0-0-0	0-1-0-0-0	Hex-Hex-Hex-Hex-(Hex-)Hex-HexNAc-HexNAc+HexNAc1	Hex-Hex-Hex-(Hex-Hex-)Hex-HexNAc-HexNAc+HexNAc1	Hex-Hex-(Hex-Hex-Hex-)Hex-HexNAc-HexNAc+HexNAc1
					1429	1422	761.015	760.684	3	2279.03	22.12	386.529	-	-	No	0	1	85.41	110.24	0	FALSE	-	2-5-0-0-0		Hex-Hex-(Hex-Hex-)Hex-HexNAc-HexNAc+Hex	Hex-Hex-Hex-(Hex-)Hex-HexNAc-HexNAc+Hex
					1434	1433	658.836	658.836	2	1315.66	22.15	624.619	-	-	No	0	1	114.35	0	0	FALSE	-	2-3-1-0-0		Hex-(Hex-)Hex-HexNAc-(DeHex-)HexNAc+Hex	Hex-(Hex-)Hex-HexNAc-HexNAc+Hex
					1438	1433	889.361	889.113	4	3552.42	22.18	492.921	-	-	No	0	1	2.92	265.82	0	FALSE	-	2-9-1-0-0		Hex-Hex-Hex-Hex-Hex-Hex-(Hex-Hex-)Hex-HexNAc-(DeHex-)HexNAc+Hex	Hex-Hex-Hex-Hex-Hex-(Hex-Hex-Hex-)Hex-HexNAc-(DeHex-)HexNAc+Hex	Hex-Hex-Hex-Hex-Hex-Hex-Hex-(Hex-)Hex-HexNAc-(DeHex-)HexNAc+Hex	Hex-Hex-Hex-Hex-(Hex-Hex-Hex-Hex-)Hex-HexNAc-(DeHex-)HexNAc+Hex
					1440	1433	1147.97	1147.47	2	2292.93	22.19	565.31	-	-	No	0	1	16.79	124.61	0	FALSE	-	3-4-1-0-0		Hex-Hex-(DeHex-HexNAc-Hex-)Hex-HexNAc-HexNAc+Hex
					1445	1444	717.645	717.311	3	2148.91	22.23	453.252	-	-	No	0	1	103.21	0	0	FALSE	-	2-3-0-0-0		Hex-(Hex-)Hex-HexNAc-HexNAc+Hex	Hex-(Hex-)Hex-HexNAc-(DeHex-)HexNAc+Hex
					1447	1444	855.117	855.117	4	3416.44	22.24	826.515	-	-	No	0	1	104.43	0	0	FALSE	-	2-3-1-0-0		Hex-(Hex-)Hex-HexNAc-(DeHex-)HexNAc+Hex
					1449	1444	1076.47	1075.46	2	2148.91	22.25	1023.38	-	-	No	0	1	100.22	0	0	FALSE	-	2-3-0-0-0		Hex-(Hex-)Hex-HexNAc-HexNAc+Hex
					1451	1444	1105.5	1105.16	3	3312.46	22.27	1128.63	-	-	No	0	1	102.01	2.38	0	FALSE	-	2-4-0-0-0		Hex-(Hex-Hex-)Hex-HexNAc-HexNAc+Hex	Hex-Hex-(Hex-)Hex-HexNAc-HexNAc+Hex
					1453	1444	940.414	940.414	2	1878.81	22.28	641.64	-	-	No	0	1	119.46	0	0	FALSE	-	2-3-1-0-0		Hex-(Hex-)Hex-HexNAc-(DeHex-)HexNAc+Hex	Hex-(Hex-)Hex-HexNAc-HexNAc+Hex
					1458	1455	877.392	877.06	3	2628.16	22.31	497.35	-	-	No	0	1	104.88	0.59	0	FALSE	-	2-4-1-0-0		Hex-Hex-(Hex-)Hex-HexNAc-(DeHex-)HexNAc+Hex	Hex-(Hex-Hex-)Hex-HexNAc-(DeHex-)HexNAc+Hex
					1460	1455	1057.42	1057.42	3	3169.25	22.33	783.724	-	-	No	0	1	159.62	41.61	0	FALSE	-	2-7-0-0-0		Hex-Hex-Hex-Hex-(Hex-Hex-)Hex-HexNAc-HexNAc+Hex	Hex-Hex-Hex-(Hex-Hex-Hex-)Hex-HexNAc-HexNAc+Hex	Hex-Hex-Hex-Hex-Hex-(Hex-)Hex-HexNAc-HexNAc+Hex
					1462	1455	904.023	903.689	3	2708.04	22.34	767.734	-	-	No	0	1	326.21	112.1	0	FALSE	-	2-5-0-0-0		Hex-Hex-(Hex-Hex-)Hex-HexNAc-HexNAc+Hex	Hex-Hex-Hex-(Hex-)Hex-HexNAc-HexNAc+Hex
					1464	1455	1043.47	1043.47	2	2084.93	22.35	684.815	-	-	No	0	1	92.48	0	0	FALSE	-	2-3-1-0-0		Hex-(Hex-)Hex-HexNAc-(DeHex-)HexNAc+Hex
					1469	1466	773.348	773.016	3	2316.03	22.39	342.911	-	-	No	0	1	1.56	103.09	0	FALSE	-	3-5-0-0-0		HexNAc-(Hex-Hex-)Hex-(Hex-)Hex-HexNAc-HexNAc+Hex	HexNAc-Hex-(Hex-(Hex-)Hex-)Hex-HexNAc-HexNAc+Hex	Hex-HexNAc-Hex-(Hex-Hex-)Hex-HexNAc-HexNAc+Hex	HexNAc-Hex-(Hex-Hex-Hex-)Hex-HexNAc-HexNAc+Hex	Hex-HexNAc-(Hex-)Hex-(Hex-)Hex-HexNAc-HexNAc+Hex	HexNAc-(Hex-)Hex-(Hex-Hex-)Hex-HexNAc-HexNAc+Hex
					1473	1466	816.682	816.347	3	2446.02	22.41	541.258	-	-	No	0	1	78.14	49.66	0	FALSE	-	3-3-2-0-0		DeHex-HexNAc-Hex-(Hex-)Hex-HexNAc-(DeHex-)HexNAc+Hex
					1478	1477	743.865	743.365	2	1484.72	22.45	734.633	-	-	No	0	1	102.13	0	0	FALSE	-	2-3-0-0-0		Hex-(Hex-)Hex-HexNAc-HexNAc+Hex
					1480	1477	740.345	740.345	2	1478.68	22.46	705.073	-	-	No	0	1	30.07	0	0	FALSE	-	2-3-0-0-0		Hex-(Hex-)Hex-HexNAc-HexNAc+Hex	Hex-(Hex-)Hex-HexNAc-(DeHex-)HexNAc+Hex
					1482	1477	905.438	905.438	2	1808.86	22.47	767.802	-	-	No	0	1	110.11	0	0	FALSE	-	2-3-0-0-0		Hex-(Hex-)Hex-HexNAc-HexNAc+Hex
					1484	1477	1146.45	1146.11	3	3435.32	22.48	1131.36	-	-	No	1	0.77	148.06	14.67	-1	TRUE	-	2-6-0-0-0	0-1-0-0-0	Hex-Hex-Hex-(Hex-)Hex-HexNAc-HexNAc+HexNAc1	Hex-Hex-(Hex-Hex-)Hex-HexNAc-HexNAc+HexNAc1
					1489	1488	1004.07	1003.4	3	3007.19	22.52	783.729	-	-	No	0	1	160.12	20.18	0	FALSE	-	4-5-0-0-0		HexNAc-Hex-Hex-Hex-(HexNAc-Hex-)Hex-HexNAc-HexNAc+Hex
					1491	1488	1007.91	1007.91	2	2013.81	22.53	671.53	-	-	No	0	1	228.44	0	0	FALSE	-	2-3-1-0-0		Hex-(Hex-)Hex-HexNAc-(DeHex-)HexNAc+Hex	Hex-(Hex-)Hex-HexNAc-HexNAc+Hex
					1493	1488	804.867	804.867	2	1607.72	22.54	751.798	-	-	No	0	1	101.3	0	0	FALSE	-	2-3-0-0-0		Hex-(Hex-)Hex-HexNAc-HexNAc+Hex
					1495	1488	661.34	661.34	3	1981	22.55	626.039	-	-	No	0	1	118.7	0	0	FALSE	-	2-3-0-0-0		Hex-(Hex-)Hex-HexNAc-HexNAc+Hex
					1500	1499	663.968	663.633	3	1987.88	22.59	611.397	-	-	No	0	1	103.76	0	0	FALSE	-	2-3-0-0-0		Hex-(Hex-)Hex-HexNAc-HexNAc+Hex
					1502	1499	1151.77	1151.43	3	3451.28	22.6	1139.3	-	-	No	1	0.96	174.92	17.35	-1	TRUE	-	2-6-0-0-0	0-1-0-0-0	Hex-Hex-Hex-(Hex-)Hex-HexNAc-HexNAc+HexNAc1	Hex-Hex-(Hex-Hex-)Hex-HexNAc-HexNAc+HexNAc1
					1506	1499	1308.54	1308.54	3	3922.6	22.63	833.409	-	-	No	0	1	8.59	113.59	0	FALSE	-	2-6-1-0-0		Hex-Hex-Hex-(Hex-Hex-)Hex-HexNAc-(DeHex-)HexNAc+Hex	Hex-Hex-Hex-Hex-(Hex-)Hex-HexNAc-(DeHex-)HexNAc+Hex	Hex-Hex-(Hex-Hex-Hex-)Hex-HexNAc-(DeHex-)HexNAc+Hex
					1508	1499	1206.46	1206.46	4	4821.81	22.64	1091.57	-	-	No	0	1	18.39	179.38	-1	TRUE	-	4-4-2-0-0	0-0-1-0-0	DeHex-HexNAc-(Hex-)Hex-(HexNAc-Hex-)Hex-HexNAc-HexNAc+DeHex1	DeHex-HexNAc-Hex-(Hex-(HexNAc-)Hex-)Hex-HexNAc-HexNAc+DeHex1	DeHex-HexNAc-(HexNAc-)Hex-(Hex-Hex-)Hex-HexNAc-HexNAc+DeHex1
					1511	1510	1123.7	1123.44	4	4489.74	22.66	880.492	-	-	No	0	1	16.06	100	0	FALSE	-	2-4-0-0-0		Hex-Hex-(Hex-)Hex-HexNAc-HexNAc+Hex	Hex-(Hex-Hex-)Hex-HexNAc-HexNAc+Hex
					1513	1510	1086.95	1086.95	2	2171.89	22.68	1036.15	-	-	No	0	1	2.11	0	0	FALSE	-	2-3-1-0-0		Hex-(Hex-)Hex-HexNAc-(DeHex-)HexNAc+Hex	Hex-(Hex-)Hex-HexNAc-HexNAc+Hex
					1515	1510	799.871	799.871	2	1597.73	22.69	765.231	-	-	No	0	1	146.09	0	0	FALSE	-	2-3-0-0-0		Hex-(Hex-)Hex-HexNAc-HexNAc+Hex
					1517	1510	1170.2	1169.95	4	4675.78	22.7	661.308	-	-	No	0	1	1.28	218.4	0	FALSE	-	4-7-3-0-1		NeuGc-Hex-(DeHex-)HexNAc-(Hex-)Hex-(DeHex-HexNAc-(Hex-Hex-)Hex-)Hex-HexNAc-(DeHex-)HexNAc+Hex	NeuGc-Hex-(DeHex-)HexNAc-(Hex-Hex-Hex-)Hex-(DeHex-HexNAc-Hex-)Hex-HexNAc-(DeHex-)HexNAc+Hex	NeuGc-Hex-(DeHex-)HexNAc-(Hex-)Hex-(Hex-(DeHex-)HexNAc-(Hex-)Hex-)Hex-HexNAc-(DeHex-)HexNAc+Hex	NeuGc-Hex-(DeHex-)HexNAc-(Hex-Hex-)Hex-(Hex-(DeHex-)HexNAc-Hex-)Hex-HexNAc-(DeHex-)HexNAc+Hex	NeuGc-Hex-(DeHex-)HexNAc-(Hex-Hex-)Hex-(DeHex-HexNAc-(Hex-)Hex-)Hex-HexNAc-(DeHex-)HexNAc+Hex
					1522	1521	730.648	730.314	3	2187.92	22.74	439.936	-	-	No	0	1	103.29	0.72	0	FALSE	-	3-4-0-0-0		HexNAc-(Hex-)Hex-(Hex-)Hex-HexNAc-HexNAc+Hex	Hex-HexNAc-Hex-(Hex-)Hex-HexNAc-HexNAc+Hex	HexNAc-Hex-(Hex-Hex-)Hex-HexNAc-HexNAc+Hex
					1524	1521	753.54	753.139	5	3760.66	22.75	447.864	-	-	No	0	1	3.6	173.1	0	FALSE	-	3-8-1-0-0		Hex-Hex-Hex-Hex-(Hex-Hex-(HexNAc-)Hex-)Hex-HexNAc-(DeHex-)HexNAc+Hex
					1526	1521	784.363	784.363	2	1566.71	22.76	732.184	-	-	No	0	0.84	106.17	0	-1	TRUE	-	2-3-1-0-0	0-0-1-0-0	Hex-(Hex-)Hex-HexNAc-HexNAc+DeHex1
					1528	1521	770.671	770.336	3	2307.99	22.77	336.186	-	-	No	0	1	0.35	100.36	0	FALSE	-	3-4-1-0-0		HexNAc-Hex-(Hex-Hex-)Hex-HexNAc-(DeHex-)HexNAc+Hex	Hex-HexNAc-Hex-(Hex-)Hex-HexNAc-(DeHex-)HexNAc+Hex	HexNAc-(Hex-)Hex-(Hex-)Hex-HexNAc-(DeHex-)HexNAc+Hex
					1530	1521	701.835	701.835	2	1401.65	22.78	614.934	-	-	No	0	1	120.3	0	0	FALSE	-	2-3-0-0-0		Hex-(Hex-)Hex-HexNAc-HexNAc+Hex
					1533	1532	1254.85	1254.18	3	3759.53	22.8	1220.24	-	-	No	0	1	176.99	3.5	0	FALSE	-	3-3-0-0-0		HexNAc-Hex-(Hex-)Hex-HexNAc-HexNAc+Hex	Hex-(HexNAc-Hex-)Hex-HexNAc-HexNAc+Hex
					1535	1532	976.442	975.938	2	1949.86	22.82	606.625	-	-	No	0	1	105.44	0	0	FALSE	-	2-3-0-0-0		Hex-(Hex-)Hex-HexNAc-HexNAc+Hex
					1537	1532	656.639	656.307	3	1965.9	22.83	586.644	-	-	No	0	1	101.54	0	0	FALSE	-	2-3-0-0-0		Hex-(Hex-)Hex-HexNAc-HexNAc+Hex
					1539	1532	787.127	786.623	4	3142.46	22.84	727.42	-	-	No	0	1	114.97	0	0	FALSE	-	2-3-1-0-0		Hex-(Hex-)Hex-HexNAc-(DeHex-)HexNAc+Hex	Hex-(Hex-)Hex-HexNAc-HexNAc+Hex
					1541	1532	935.767	935.604	6	5607.58	22.85	659.056	-	-	No	0	1	10	235.75	0	FALSE	-	5-4-1-0-1		NeuGc-Hex-HexNAc-Hex-(HexNAc-(HexNAc-)Hex-)Hex-HexNAc-(DeHex-)HexNAc+Hex	NeuGc-Hex-HexNAc-(HexNAc-)Hex-(HexNAc-Hex-)Hex-HexNAc-(DeHex-)HexNAc+Hex
					1544	1543	693.353	693.019	3	2076.03	22.87	570.066	-	-	No	0	1	105.4	0	0	FALSE	-	2-3-0-0-0		Hex-(Hex-)Hex-HexNAc-HexNAc+Hex
					1546	1543	701.831	701.831	2	1401.65	22.88	348.688	-	-	No	0	1	114.57	0	0	FALSE	-	2-3-1-0-0		Hex-(Hex-)Hex-HexNAc-(DeHex-)HexNAc+Hex	Hex-(Hex-)Hex-HexNAc-HexNAc+Hex
					1548	1543	839.024	838.687	3	2513.04	22.89	387.43	-	-	No	0	1	5.78	122.32	0	FALSE	-	4-3-1-0-0		HexNAc-(HexNAc-)Hex-(Hex-)Hex-HexNAc-(DeHex-)HexNAc+Hex	HexNAc-Hex-(HexNAc-Hex-)Hex-HexNAc-(DeHex-)HexNAc+Hex
					1550	1543	867.348	866.845	4	3463.35	22.91	672.824	-	-	No	0	1	22.89	201.16	0	FALSE	-	3-4-0-0-1		NeuGc-Hex-HexNAc-Hex-(Hex-)Hex-HexNAc-HexNAc+Hex
					1552	1543	1202.47	1202.47	3	3604.4	22.92	459.729	-	-	No	0	1	1.08	151.25	0	FALSE	-	3-11-2-0-0		Hex-Hex-Hex-(Hex-Hex-Hex-)Hex-(DeHex-HexNAc-(Hex-Hex-)Hex-)Hex-HexNAc-(DeHex-)HexNAc+Hex	Hex-(DeHex-)HexNAc-Hex-Hex-(Hex-Hex-)Hex-(Hex-(Hex-Hex-)Hex-)Hex-HexNAc-(DeHex-)HexNAc+Hex	Hex-Hex-Hex-Hex-(DeHex-HexNAc-Hex-Hex-)Hex-(Hex-Hex-Hex-)Hex-HexNAc-(DeHex-)HexNAc+Hex	Hex-Hex-Hex-Hex-(DeHex-HexNAc-Hex-Hex-)Hex-(Hex-(Hex-)Hex-)Hex-HexNAc-(DeHex-)HexNAc+Hex	Hex-Hex-Hex-Hex-Hex-(DeHex-HexNAc-Hex-Hex-)Hex-(Hex-Hex-)Hex-HexNAc-(DeHex-)HexNAc+Hex	Hex-(DeHex-)HexNAc-Hex-Hex-(Hex-)Hex-(Hex-Hex-Hex-Hex-Hex-)Hex-HexNAc-(DeHex-)HexNAc+Hex	Hex-(DeHex-)HexNAc-Hex-Hex-(Hex-)Hex-(Hex-Hex-(Hex-Hex-)Hex-)Hex-HexNAc-(DeHex-)HexNAc+Hex	Hex-(DeHex-)HexNAc-Hex-Hex-(Hex-)Hex-(Hex-Hex-Hex-(Hex-)Hex-)Hex-HexNAc-(DeHex-)HexNAc+Hex	Hex-(DeHex-)HexNAc-Hex-Hex-(Hex-Hex-)Hex-(Hex-Hex-Hex-Hex-)Hex-HexNAc-(DeHex-)HexNAc+Hex	DeHex-HexNAc-Hex-Hex-(Hex-Hex-Hex-)Hex-(Hex-(Hex-Hex-)Hex-)Hex-HexNAc-(DeHex-)HexNAc+Hex	Hex-(DeHex-)HexNAc-Hex-Hex-(Hex-Hex-)Hex-(Hex-Hex-(Hex-)Hex-)Hex-HexNAc-(DeHex-)HexNAc+Hex	Hex-(DeHex-)HexNAc-Hex-Hex-(Hex-Hex-Hex-)Hex-(Hex-Hex-Hex-)Hex-HexNAc-(DeHex-)HexNAc+Hex	Hex-(DeHex-)HexNAc-Hex-Hex-(Hex-Hex-Hex-Hex-)Hex-(Hex-Hex-)Hex-HexNAc-(DeHex-)HexNAc+Hex	Hex-Hex-Hex-Hex-Hex-(DeHex-HexNAc-)Hex-(Hex-Hex-Hex-Hex-)Hex-HexNAc-(DeHex-)HexNAc+Hex	Hex-Hex-Hex-(Hex-(DeHex-)HexNAc-)Hex-(Hex-Hex-Hex-Hex-Hex-)Hex-HexNAc-(DeHex-)HexNAc+Hex	Hex-Hex-Hex-(Hex-(DeHex-)HexNAc-)Hex-(Hex-Hex-Hex-(Hex-)Hex-)Hex-HexNAc-(DeHex-)HexNAc+Hex	Hex-Hex-Hex-Hex-(Hex-(DeHex-)HexNAc-)Hex-(Hex-Hex-Hex-Hex-)Hex-HexNAc-(DeHex-)HexNAc+Hex	Hex-Hex-Hex-(DeHex-HexNAc-)Hex-(Hex-Hex-Hex-Hex-Hex-Hex-)Hex-HexNAc-(DeHex-)HexNAc+Hex	DeHex-HexNAc-Hex-Hex-(Hex-Hex-Hex-Hex-)Hex-(Hex-(Hex-)Hex-)Hex-HexNAc-(DeHex-)HexNAc+Hex	DeHex-HexNAc-Hex-Hex-(Hex-Hex-Hex-)Hex-(Hex-Hex-(Hex-)Hex-)Hex-HexNAc-(DeHex-)HexNAc+Hex	Hex-Hex-Hex-(Hex-Hex-Hex-Hex-)Hex-(DeHex-HexNAc-(Hex-)Hex-)Hex-HexNAc-(DeHex-)HexNAc+Hex	Hex-Hex-Hex-(DeHex-HexNAc-)Hex-(Hex-Hex-Hex-(Hex-Hex-)Hex-)Hex-HexNAc-(DeHex-)HexNAc+Hex	Hex-Hex-Hex-Hex-Hex-Hex-(DeHex-HexNAc-Hex-Hex-(Hex-)Hex-)Hex-HexNAc-(DeHex-)HexNAc+Hex	Hex-Hex-Hex-(Hex-Hex-)Hex-(Hex-(DeHex-)HexNAc-(Hex-Hex-)Hex-)Hex-HexNAc-(DeHex-)HexNAc+Hex	Hex-Hex-Hex-(Hex-Hex-Hex-)Hex-(Hex-Hex-(DeHex-HexNAc-)Hex-)Hex-HexNAc-(DeHex-)HexNAc+Hex
					1555	1554	995.455	994.953	2	1987.89	22.94	846.555	-	-	No	0	1	109.78	0	0	FALSE	-	2-3-0-0-0		Hex-(Hex-)Hex-HexNAc-HexNAc+Hex
					1557	1554	710.349	710.01	3	2127.01	22.95	659.508	-	-	No	0	1	103.81	0	0	FALSE	-	2-3-0-0-0		Hex-(Hex-)Hex-HexNAc-HexNAc+Hex
					1561	1554	732.849	732.849	4	2927.37	22.98	456.879	-	-	No	0	1	10.26	114.69	0	FALSE	-	3-4-0-0-0		HexNAc-(Hex-)Hex-(Hex-)Hex-HexNAc-HexNAc+Hex	HexNAc-Hex-(Hex-Hex-)Hex-HexNAc-HexNAc+Hex	Hex-HexNAc-Hex-(Hex-)Hex-HexNAc-HexNAc+Hex
					1563	1554	777.348	777.348	2	1552.68	22.99	496.233	-	-	No	0	1	107.96	0	0	FALSE	-	2-3-1-0-0		Hex-(Hex-)Hex-HexNAc-(DeHex-)HexNAc+Hex	Hex-(Hex-)Hex-HexNAc-HexNAc+Hex
					1570	1565	1155.79	1155.47	3	3463.38	23.05	926.686	-	-	No	0	1	165.38	0	0	FALSE	-	2-3-1-0-0		Hex-(Hex-)Hex-HexNAc-(DeHex-)HexNAc+Hex
					1572	1565	1070.81	1070.48	3	3208.43	23.06	803.277	-	-	No	0	1	203.38	108.72	0	FALSE	-	2-7-0-0-0		Hex-Hex-Hex-Hex-(Hex-Hex-)Hex-HexNAc-HexNAc+Hex	Hex-Hex-Hex-Hex-Hex-(Hex-)Hex-HexNAc-HexNAc+Hex	Hex-Hex-Hex-(Hex-Hex-Hex-)Hex-HexNAc-HexNAc+Hex
					1574	1565	1035.38	1034.88	2	2067.75	23.07	1017.75	-	-	No	0	1	148.27	0	0	FALSE	-	2-3-0-0-0		Hex-(Hex-)Hex-HexNAc-HexNAc+Hex
					1581	1576	750.959	750.628	3	2248.86	23.12	270.151	-	-	No	0	1	0.45	102.96	0	FALSE	-	3-4-2-0-0		DeHex-HexNAc-(Hex-)Hex-(Hex-)Hex-HexNAc-(DeHex-)HexNAc+Hex	Hex-(DeHex-)HexNAc-Hex-(Hex-)Hex-HexNAc-(DeHex-)HexNAc+Hex	DeHex-HexNAc-Hex-(Hex-Hex-)Hex-HexNAc-(DeHex-)HexNAc+Hex
					1583	1576	653.652	653.321	3	1956.94	23.13	628.821	-	-	No	0	1	110.96	0	0	FALSE	-	2-3-0-0-0		Hex-(Hex-)Hex-HexNAc-HexNAc+Hex
					1585	1576	882.686	882.348	3	2644.02	23.14	637	-	-	No	0	1	102.04	0	0	FALSE	-	2-3-1-0-0		Hex-(Hex-)Hex-HexNAc-(DeHex-)HexNAc+Hex	Hex-(Hex-)Hex-HexNAc-HexNAc+Hex
					1588	1587	895.703	895.365	3	2683.07	23.16	783.659	-	-	No	0	1	130.32	0	0	FALSE	-	2-3-0-0-0		Hex-(Hex-)Hex-HexNAc-HexNAc+Hex
					1590	1587	767.891	767.891	2	1533.77	23.18	719.235	-	-	No	0	1	102.13	0	0	FALSE	-	2-3-0-0-0		Hex-(Hex-)Hex-HexNAc-HexNAc+Hex
					1592	1587	1161.47	1161.47	3	3481.4	23.19	929.871	-	-	No	0	1	13.01	134.31	0	FALSE	-	4-5-0-0-0		Hex-(HexNAc-)Hex-(HexNAc-(Hex-)Hex-)Hex-HexNAc-HexNAc+Hex	Hex-(HexNAc-)Hex-(Hex-HexNAc-Hex-)Hex-HexNAc-HexNAc+Hex	Hex-HexNAc-(HexNAc-)Hex-(Hex-Hex-)Hex-HexNAc-HexNAc+Hex	Hex-(Hex-HexNAc-)Hex-(HexNAc-Hex-)Hex-HexNAc-HexNAc+Hex	HexNAc-(HexNAc-)Hex-(Hex-(Hex-)Hex-)Hex-HexNAc-HexNAc+Hex	HexNAc-(Hex-HexNAc-)Hex-(Hex-Hex-)Hex-HexNAc-HexNAc+Hex	HexNAc-(HexNAc-)Hex-(Hex-Hex-Hex-)Hex-HexNAc-HexNAc+Hex	Hex-HexNAc-Hex-(HexNAc-(Hex-)Hex-)Hex-HexNAc-HexNAc+Hex	Hex-HexNAc-Hex-HexNAc-Hex-(Hex-)Hex-HexNAc-HexNAc+Hex	Hex-HexNAc-(Hex-HexNAc-)Hex-(Hex-)Hex-HexNAc-HexNAc+Hex	HexNAc-(Hex-)Hex-(Hex-HexNAc-Hex-)Hex-HexNAc-HexNAc+Hex	HexNAc-(Hex-)Hex-(HexNAc-(Hex-)Hex-)Hex-HexNAc-HexNAc+Hex	Hex-HexNAc-Hex-(Hex-HexNAc-Hex-)Hex-HexNAc-HexNAc+Hex	HexNAc-(Hex-Hex-)Hex-(HexNAc-Hex-)Hex-HexNAc-HexNAc+Hex
					1594	1587	678.962	678.625	3	2032.85	23.21	626.599	-	-	No	0	1	115.68	0	0	FALSE	-	2-3-1-0-0		Hex-(Hex-)Hex-HexNAc-(DeHex-)HexNAc+Hex	Hex-(Hex-)Hex-HexNAc-HexNAc+Hex
					1596	1587	1200.5	1200.16	3	3597.46	23.22	387.43	-	-	No	0	1	2.92	427.78	0	FALSE	-	4-8-2-0-0		HexNAc-Hex-Hex-(DeHex-HexNAc-)Hex-(Hex-Hex-(Hex-)Hex-)Hex-HexNAc-(DeHex-)HexNAc+Hex	Hex-Hex-(DeHex-HexNAc-)Hex-(HexNAc-Hex-Hex-(Hex-)Hex-)Hex-HexNAc-(DeHex-)HexNAc+Hex	HexNAc-Hex-Hex-(DeHex-HexNAc-)Hex-(Hex-Hex-Hex-Hex-)Hex-HexNAc-(DeHex-)HexNAc+Hex
					1599	1598	1189.45	1188.95	2	2375.89	23.24	1121.67	-	-	No	0	1	117.28	0	0	FALSE	-	2-3-0-0-0		Hex-(Hex-)Hex-HexNAc-HexNAc+Hex
					1601	1598	737.339	737.339	3	2209	23.25	684.794	-	-	No	0	1	114.36	0	0	FALSE	-	2-3-0-0-0		Hex-(Hex-)Hex-HexNAc-HexNAc+Hex
					1603	1598	841.94	841.94	2	1681.87	23.27	816.106	-	-	No	0	1	71.9	0	0	FALSE	-	2-3-0-0-0		Hex-(Hex-)Hex-HexNAc-HexNAc+Hex
					1605	1598	837.063	836.724	3	2507.15	23.28	539.294	-	-	No	0	1	138.41	15.67	0	FALSE	-	2-5-1-0-0		Hex-Hex-Hex-(Hex-)Hex-HexNAc-(DeHex-)HexNAc+Hex	Hex-Hex-(Hex-Hex-)Hex-HexNAc-(DeHex-)HexNAc+Hex
					1607	1598	923.442	922.941	2	1843.87	23.3	698.481	-	-	No	0	1	105.09	0	0	FALSE	-	2-3-0-0-0		Hex-(Hex-)Hex-HexNAc-HexNAc+Hex	Hex-(Hex-)Hex-HexNAc-(DeHex-)HexNAc+Hex
					1610	1609	745.327	745.327	3	2232.96	23.32	780.665	-	-	No	0	1	149.26	0	0	FALSE	-	2-3-0-0-0		Hex-(Hex-)Hex-HexNAc-HexNAc+Hex
					1612	1609	714.844	714.844	2	1427.67	23.33	705.786	-	-	No	0	1	121.46	0	0	FALSE	-	2-3-0-0-0		Hex-(Hex-)Hex-HexNAc-HexNAc+Hex
					1614	1609	763.354	763.354	2	1524.69	23.34	711.106	-	-	No	0	1	100.45	0	0	FALSE	-	2-3-0-0-0		Hex-(Hex-)Hex-HexNAc-HexNAc+Hex
					1616	1609	968.414	967.408	2	1932.8	23.35	905.496	-	-	No	0	1	102.03	0	0	FALSE	-	2-3-0-0-0		Hex-(Hex-)Hex-HexNAc-HexNAc+Hex
					1618	1609	851.041	851.041	3	2550.1	23.36	833.582	-	-	No	0	1	119.51	0	0	FALSE	-	2-3-1-0-0		Hex-(Hex-)Hex-HexNAc-(DeHex-)HexNAc+Hex
					1623	1620	884.675	884.336	3	2649.99	23.4	698.683	-	-	No	0	1	230.88	0	0	FALSE	-	2-3-1-0-0		Hex-(Hex-)Hex-HexNAc-(DeHex-)HexNAc+Hex	Hex-(Hex-)Hex-HexNAc-HexNAc+Hex
					1625	1620	1722.67	1721.66	2	3441.31	23.41	1134.59	-	-	No	0	1	141.87	96.94	0	FALSE	-	2-5-0-0-0		Hex-Hex-Hex-(Hex-)Hex-HexNAc-HexNAc+Hex	Hex-Hex-(Hex-Hex-)Hex-HexNAc-HexNAc+Hex
					1627	1620	963.429	963.429	2	1924.84	23.43	911.249	-	-	No	0	1	100.57	0	0	FALSE	-	2-3-0-0-0		Hex-(Hex-)Hex-HexNAc-HexNAc+Hex
					1638	1631	1326.51	1326	2	2649.99	23.5	1192.58	-	-	No	0	1	111.15	0	0	FALSE	-	2-3-0-0-0		Hex-(Hex-)Hex-HexNAc-HexNAc+Hex
					1640	1631	689.382	689.382	2	1376.75	23.51	277.888	-	-	No	0	1	50.89	0	0	FALSE	-	2-3-0-0-0		Hex-(Hex-)Hex-HexNAc-HexNAc+Hex
					1643	1642	1508.64	1508.13	2	3014.25	23.53	1456.01	-	-	No	0	1	100.08	0	0	FALSE	-	2-3-0-0-0		Hex-(Hex-)Hex-HexNAc-HexNAc+Hex
					1645	1642	1013.42	1013.09	3	3036.24	23.54	553.517	-	-	No	0	1	0.1	100.17	0	FALSE	-	2-5-0-0-0		Hex-Hex-Hex-(Hex-)Hex-HexNAc-HexNAc+Hex	Hex-Hex-(Hex-Hex-)Hex-HexNAc-HexNAc+Hex
					1647	1642	697.342	697.091	4	2784.34	23.55	671.095	-	-	No	0	1	122.71	0	0	FALSE	-	2-3-1-0-0		Hex-(Hex-)Hex-HexNAc-(DeHex-)HexNAc+Hex	Hex-(Hex-)Hex-HexNAc-HexNAc+Hex
					1649	1642	783.039	782.708	3	2345.1	23.56	770.112	-	-	No	0	1	112.27	0	0	FALSE	-	2-3-1-0-0		Hex-(Hex-)Hex-HexNAc-(DeHex-)HexNAc+Hex
					1651	1642	675.76	675.76	4	2699.01	23.57	573.265	-	-	No	0	1	177.21	0	0	FALSE	-	2-3-0-0-0		Hex-(Hex-)Hex-HexNAc-HexNAc+Hex	Hex-(Hex-)Hex-HexNAc-(DeHex-)HexNAc+Hex
					1654	1653	1037.41	1037.08	3	3108.21	23.59	547.259	-	-	No	0	1	1.2	100.87	0	FALSE	-	3-5-1-0-0		Hex-Hex-(Hex-HexNAc-Hex-)Hex-HexNAc-(DeHex-)HexNAc+Hex	Hex-Hex-(HexNAc-(Hex-)Hex-)Hex-HexNAc-(DeHex-)HexNAc+Hex	Hex-(Hex-)Hex-(HexNAc-Hex-)Hex-HexNAc-(DeHex-)HexNAc+Hex
					1656	1653	1018.74	1018.41	3	3052.2	23.6	719.842	-	-	No	0	1	100.13	0.14	0	FALSE	-	2-4-1-0-0		Hex-(Hex-Hex-)Hex-HexNAc-(DeHex-)HexNAc+Hex	Hex-Hex-(Hex-)Hex-HexNAc-(DeHex-)HexNAc+Hex
					1658	1653	686.676	685.352	3	2053.03	23.61	651.754	-	-	No	0	1	100.36	0	0	FALSE	-	2-3-1-0-0		Hex-(Hex-)Hex-HexNAc-(DeHex-)HexNAc+Hex	Hex-(Hex-)Hex-HexNAc-HexNAc+Hex
					1662	1653	706.33	706.33	3	2115.97	23.64	579.289	-	-	No	0	1	102.75	0	0	FALSE	-	2-3-0-0-0		Hex-(Hex-)Hex-HexNAc-HexNAc+Hex	Hex-(Hex-)Hex-HexNAc-(DeHex-)HexNAc+Hex
					1665	1664	779.832	779.583	4	3114.3	23.66	729.601	-	-	No	0	1	114.77	0.64	0	FALSE	-	2-4-0-0-0		Hex-(Hex-Hex-)Hex-HexNAc-HexNAc+Hex	Hex-Hex-(Hex-)Hex-HexNAc-HexNAc+Hex
					1667	1664	1108.42	1107.92	2	2213.83	23.67	1121.64	-	-	No	0	1	119.31	0	0	FALSE	-	2-3-0-0-0		Hex-(Hex-)Hex-HexNAc-HexNAc+Hex
					1669	1664	715.346	714.845	2	1427.67	23.68	706.212	-	-	No	0	1	159.38	0	0	FALSE	-	2-3-0-0-0		Hex-(Hex-)Hex-HexNAc-HexNAc+Hex
					1671	1664	796.885	796.885	2	1591.76	23.69	481.482	-	-	No	0	1	130.39	0	0	FALSE	-	2-3-0-0-0		Hex-(Hex-)Hex-HexNAc-HexNAc+Hex	Hex-(Hex-)Hex-HexNAc-(DeHex-)HexNAc+Hex
					1673	1664	825.394	825.394	4	3297.55	23.7	808.543	-	-	No	0	1	117.3	0	0	FALSE	-	2-3-0-0-0		Hex-(Hex-)Hex-HexNAc-HexNAc+Hex	Hex-(Hex-)Hex-HexNAc-(DeHex-)HexNAc+Hex
					1676	1675	726.357	726.357	2	1450.7	23.72	1160.69	-	-	No	0	1	100.19	0	0	FALSE	-	2-3-0-0-0		Hex-(Hex-)Hex-HexNAc-HexNAc+Hex
					1678	1675	1100.86	1100.19	3	3297.55	23.74	1341.58	-	-	No	0	1	108.47	0	0	FALSE	-	2-3-1-0-0		Hex-(Hex-)Hex-HexNAc-(DeHex-)HexNAc+Hex	Hex-(Hex-)Hex-HexNAc-HexNAc+Hex
					1680	1675	808.035	807.701	3	2420.08	23.75	590.263	-	-	No	0	1	122.67	0.09	-1	TRUE	-	4-3-1-0-0	1-0-0-0-0	HexNAc-Hex-(Hex-)Hex-HexNAc-(DeHex-)HexNAc+Hex1	Hex-(HexNAc-Hex-)Hex-HexNAc-(DeHex-)HexNAc+Hex1
					1684	1675	1029.52	1029.52	2	2057.02	23.77	713.533	-	-	No	0	1	100.81	0	0	FALSE	-	2-3-0-0-0		Hex-(Hex-)Hex-HexNAc-HexNAc+Hex
					1687	1686	651.338	651.338	3	1950.99	23.79	616.671	-	-	No	0	1	120.28	0	0	FALSE	-	2-3-0-0-0		Hex-(Hex-)Hex-HexNAc-HexNAc+Hex
					1689	1686	722.77	722.77	2	1443.53	23.81	417.947	-	-	No	0	1	114.93	0	0	FALSE	-	2-3-0-0-0		Hex-(Hex-)Hex-HexNAc-HexNAc+Hex
					1693	1686	1148.45	1148.12	3	3441.32	23.83	1120.27	-	-	No	0	1	135.37	2.29	0	FALSE	-	2-5-0-0-0		Hex-Hex-(Hex-Hex-)Hex-HexNAc-HexNAc+Hex	Hex-Hex-Hex-(Hex-)Hex-HexNAc-HexNAc+Hex
					1695	1686	985.469	984.971	2	1967.93	23.84	932.79	-	-	No	0	1	100.27	0	0	FALSE	-	2-3-0-0-0		Hex-(Hex-)Hex-HexNAc-HexNAc+Hex
					1698	1697	669.957	669.957	3	2006.85	23.87	290.148	-	-	No	0	1	100.42	0	0	FALSE	-	2-3-0-0-0		Hex-(Hex-)Hex-HexNAc-HexNAc+Hex
					1700	1697	683.343	683.009	3	2046.01	23.88	614.356	-	-	No	0	1	164.17	0	0	FALSE	-	2-3-1-0-0		Hex-(Hex-)Hex-HexNAc-(DeHex-)HexNAc+Hex
					1702	1697	858.934	858.435	2	1714.86	23.89	823.208	-	-	No	0	1	112.78	0	0	FALSE	-	2-3-0-0-0		Hex-(Hex-)Hex-HexNAc-HexNAc+Hex
					1704	1697	1244.97	1244.97	2	2487.93	23.9	1192.65	-	-	No	0	1	110	0	0	FALSE	-	2-3-0-0-0		Hex-(Hex-)Hex-HexNAc-HexNAc+Hex
					1706	1697	1064.47	1064.22	4	4252.85	23.92	744.693	-	-	No	0	1	15.61	183.69	0	FALSE	-	3-6-1-1-0		Hex-(Hex-)Hex-(NeuAc-Hex-HexNAc-Hex-)Hex-HexNAc-(DeHex-)HexNAc+Hex	NeuAc-Hex-HexNAc-(Hex-)Hex-(Hex-Hex-)Hex-HexNAc-(DeHex-)HexNAc+Hex	NeuAc-Hex-HexNAc-Hex-(Hex-(Hex-)Hex-)Hex-HexNAc-(DeHex-)HexNAc+Hex	NeuAc-Hex-HexNAc-Hex-(Hex-Hex-Hex-)Hex-HexNAc-(DeHex-)HexNAc+Hex	Hex-Hex-Hex-(NeuAc-Hex-HexNAc-Hex-)Hex-HexNAc-(DeHex-)HexNAc+Hex
					1709	1708	876.41	876.41	2	1750.81	23.94	641.64	-	-	No	0	1	101.25	0	0	FALSE	-	2-3-0-0-0		Hex-(Hex-)Hex-HexNAc-HexNAc+Hex	Hex-(Hex-)Hex-HexNAc-(DeHex-)HexNAc+Hex
					1711	1708	854.411	854.075	3	2559.2	23.95	641.564	-	-	No	0	1	121.22	0	0	FALSE	-	2-3-1-0-0		Hex-(Hex-)Hex-HexNAc-(DeHex-)HexNAc+Hex	Hex-(Hex-)Hex-HexNAc-HexNAc+Hex
					1715	1708	849.4	849.4	3	2545.18	23.98	599.618	-	-	No	0	1	94.67	176.33	0	FALSE	-	3-4-1-0-0		DeHex-HexNAc-(Hex-)Hex-(Hex-)Hex-HexNAc-HexNAc+Hex	Hex-(DeHex-)HexNAc-Hex-(Hex-)Hex-HexNAc-HexNAc+Hex	DeHex-HexNAc-Hex-(Hex-Hex-)Hex-HexNAc-HexNAc+Hex
					1717	1708	810.375	810.127	4	3236.48	23.99	689.07	-	-	No	0	1	76.25	96.93	0	FALSE	-	2-5-0-0-0		Hex-Hex-(Hex-Hex-)Hex-HexNAc-HexNAc+Hex	Hex-Hex-Hex-(Hex-)Hex-HexNAc-HexNAc+Hex
					1720	1719	869.712	869.381	3	2605.12	24.01	837.795	-	-	No	0	1	125.11	0	0	FALSE	-	2-3-0-0-0		Hex-(Hex-)Hex-HexNAc-HexNAc+Hex
					1722	1719	791.829	791.829	2	1581.64	24.03	508.25	-	-	No	0	1	121.16	0	0	FALSE	-	2-3-0-0-0		Hex-(Hex-)Hex-HexNAc-HexNAc+Hex	Hex-(Hex-)Hex-HexNAc-(DeHex-)HexNAc+Hex
					1724	1719	1052.68	1052.19	4	4204.72	24.04	637	-	-	No	0	1	6.71	221.55	0	FALSE	-	6-4-4-0-0		Hex-(DeHex-)HexNAc-(DeHex-HexNAc-)Hex-(DeHex-HexNAc-(HexNAc-)Hex-)Hex-HexNAc-(DeHex-)HexNAc+Hex	DeHex-HexNAc-(DeHex-HexNAc-)Hex-(HexNAc-Hex-(DeHex-)HexNAc-Hex-)Hex-HexNAc-(DeHex-)HexNAc+Hex	HexNAc-Hex-(DeHex-)HexNAc-(DeHex-HexNAc-)Hex-(DeHex-HexNAc-Hex-)Hex-HexNAc-(DeHex-)HexNAc+Hex	DeHex-HexNAc-(DeHex-HexNAc-)Hex-(Hex-(DeHex-)HexNAc-(HexNAc-)Hex-)Hex-HexNAc-(DeHex-)HexNAc+Hex
					1726	1719	1009.8	1009.47	3	3025.39	24.06	672.824	-	-	No	0	1	15.85	100	0	FALSE	-	3-3-0-0-0		HexNAc-Hex-(Hex-)Hex-HexNAc-HexNAc+Hex	Hex-(HexNAc-Hex-)Hex-HexNAc-HexNAc+Hex
					1728	1719	1283.58	1282.91	3	3845.72	24.08	290.148	-	-	No	0	1	1.77	142.37	0	FALSE	-	2-10-0-0-0		Hex-Hex-Hex-Hex-(Hex-Hex-Hex-Hex-Hex-)Hex-HexNAc-HexNAc+Hex	Hex-Hex-Hex-Hex-Hex-Hex-(Hex-Hex-Hex-)Hex-HexNAc-HexNAc+Hex	Hex-Hex-Hex-Hex-Hex-Hex-Hex-(Hex-Hex-)Hex-HexNAc-HexNAc+Hex	Hex-Hex-Hex-Hex-Hex-Hex-Hex-Hex-(Hex-)Hex-HexNAc-HexNAc+Hex	Hex-Hex-Hex-Hex-Hex-(Hex-Hex-Hex-Hex-)Hex-HexNAc-HexNAc+Hex
					1731	1730	665.291	664.957	3	1991.85	24.1	595.311	-	-	No	0	1	101.69	0	0	FALSE	-	2-3-1-0-0		Hex-(Hex-)Hex-HexNAc-(DeHex-)HexNAc+Hex	Hex-(Hex-)Hex-HexNAc-HexNAc+Hex
					1733	1730	1050.16	1049.83	3	3146.46	24.11	1128.63	-	-	No	0	1	101.07	0	0	FALSE	-	2-3-0-0-0		Hex-(Hex-)Hex-HexNAc-HexNAc+Hex	Hex-(Hex-)Hex-HexNAc-(DeHex-)HexNAc+Hex
					1735	1730	954.414	953.4	2	1904.79	24.13	481.482	-	-	No	0	1	103.73	0	0	FALSE	-	2-3-0-0-0		Hex-(Hex-)Hex-HexNAc-HexNAc+Hex	Hex-(Hex-)Hex-HexNAc-(DeHex-)HexNAc+Hex
					1737	1730	929.455	929.123	3	2784.35	24.14	791.055	-	-	No	0	1	119.46	0	0	FALSE	-	2-3-1-0-0		Hex-(Hex-)Hex-HexNAc-(DeHex-)HexNAc+Hex	Hex-(Hex-)Hex-HexNAc-HexNAc+Hex
					1742	1741	765.721	765.389	3	2293.15	24.18	715.526	-	-	No	0	1	176.83	0	0	FALSE	-	2-3-0-0-0		Hex-(Hex-)Hex-HexNAc-HexNAc+Hex
					1744	1741	800.401	800.063	3	2397.17	24.19	600.633	-	-	No	0	1	147.53	0	0	FALSE	-	2-3-0-0-0		Hex-(Hex-)Hex-HexNAc-HexNAc+Hex
					1748	1741	757.027	757.027	3	2268.06	24.22	637	-	-	No	0	1	116.04	0	0	FALSE	-	2-3-0-0-0		Hex-(Hex-)Hex-HexNAc-HexNAc+Hex
					1755	1752	898.87	898.87	2	1795.73	24.27	405.693	-	-	No	0	1	119.4	0	0	FALSE	-	2-3-0-0-0		Hex-(Hex-)Hex-HexNAc-HexNAc+Hex
					1759	1752	901.694	901.361	3	2701.06	24.3	863.217	-	-	No	0	1	101.89	0	0	FALSE	-	2-3-0-0-0		Hex-(Hex-)Hex-HexNAc-HexNAc+Hex	Hex-(Hex-)Hex-HexNAc-(DeHex-)HexNAc+Hex
					1761	1752	823.386	823.386	2	1644.76	24.31	789.078	-	-	No	0	1	8.44	0	0	FALSE	-	2-3-0-0-0		Hex-(Hex-)Hex-HexNAc-HexNAc+Hex
					1764	1763	1087.47	1086.97	2	2171.92	24.33	913.609	-	-	No	0	1	140.29	0	0	FALSE	-	2-3-0-0-0		Hex-(Hex-)Hex-HexNAc-HexNAc+Hex
					1766	1763	880.399	880.399	2	1758.78	24.35	584.395	-	-	No	0	1	118.56	0	0	FALSE	-	2-3-0-0-0		Hex-(Hex-)Hex-HexNAc-HexNAc+Hex
					1768	1763	892.367	892.367	2	1782.72	24.36	719.842	-	-	No	0	1	115.26	0	0	FALSE	-	2-3-0-0-0		Hex-(Hex-)Hex-HexNAc-HexNAc+Hex
					1772	1763	933.422	932.925	2	1863.84	24.38	880.242	-	-	No	0	1	104.93	0	0	FALSE	-	2-3-1-0-0		Hex-(Hex-)Hex-HexNAc-(DeHex-)HexNAc+Hex	Hex-(Hex-)Hex-HexNAc-HexNAc+Hex
					1775	1774	656.334	656.334	2	1310.65	24.41	613.789	-	-	No	0	1	118.56	0	0	FALSE	-	2-3-0-0-0		Hex-(Hex-)Hex-HexNAc-HexNAc+Hex
					1777	1774	839.399	839.399	2	1676.78	24.42	667.387	-	-	No	0	1	162.88	0	0	FALSE	-	2-3-0-0-0		Hex-(Hex-)Hex-HexNAc-HexNAc+Hex
					1781	1774	820.362	820.027	3	2457.06	24.44	415.896	-	-	No	0	1	3.33	111.31	0	FALSE	-	3-4-0-0-0		HexNAc-Hex-(Hex-Hex-)Hex-HexNAc-HexNAc+Hex	Hex-HexNAc-Hex-(Hex-)Hex-HexNAc-HexNAc+Hex	HexNAc-(Hex-)Hex-(Hex-)Hex-HexNAc-HexNAc+Hex
					1783	1774	739.883	739.883	2	1477.75	24.45	713.291	-	-	No	0	1	101.89	0	0	FALSE	-	2-3-0-0-0		Hex-(Hex-)Hex-HexNAc-HexNAc+Hex
					1786	1785	719.312	718.979	3	2153.91	24.47	776.211	-	-	No	0	1	108.83	0	0	FALSE	-	2-3-0-0-0		Hex-(Hex-)Hex-HexNAc-HexNAc+Hex
					1788	1785	940.414	939.916	2	1877.82	24.49	659.056	-	-	No	0	1	93.41	0	0	FALSE	-	2-3-0-0-0		Hex-(Hex-)Hex-HexNAc-HexNAc+Hex
					1790	1785	710.345	710.012	3	2127.01	24.5	430.201	-	-	No	0	1	108.47	0	0	FALSE	-	2-3-1-0-0		Hex-(Hex-)Hex-HexNAc-(DeHex-)HexNAc+Hex	Hex-(Hex-)Hex-HexNAc-HexNAc+Hex
					1792	1785	786.348	786.348	2	1570.68	24.51	659.056	-	-	No	0	1	101.04	0	0	FALSE	-	2-3-0-0-0		Hex-(Hex-)Hex-HexNAc-HexNAc+Hex
					1794	1785	795.66	795.32	3	2382.94	24.52	642.596	-	-	No	0	1	132.76	0	0	FALSE	-	2-3-0-0-0		Hex-(Hex-)Hex-HexNAc-HexNAc+Hex	Hex-(Hex-)Hex-HexNAc-(DeHex-)HexNAc+Hex
					1797	1796	918.951	918.951	2	1835.89	24.55	859.394	-	-	No	0	1	161.79	0	0	FALSE	-	2-3-0-0-0		Hex-(Hex-)Hex-HexNAc-HexNAc+Hex
					1799	1796	759.357	758.857	2	1515.7	24.56	312.174	-	-	No	0	1	108.26	0	0	FALSE	-	2-3-0-0-0		Hex-(Hex-)Hex-HexNAc-HexNAc+Hex
					1801	1796	1192.48	1192.48	2	2382.95	24.57	1283.56	-	-	No	0	1	124.81	0	0	FALSE	-	2-3-0-0-0		Hex-(Hex-)Hex-HexNAc-HexNAc+Hex
					1803	1796	1104.48	1104.48	2	2206.95	24.59	1404.42	-	-	No	0	1	101.62	0	0	FALSE	-	2-3-0-0-0		Hex-(Hex-)Hex-HexNAc-HexNAc+Hex
					1805	1796	1234.53	1234.53	3	3700.57	24.61	625.309	-	-	No	0	1	21.21	402.15	0	FALSE	-	6-4-4-0-0		DeHex-HexNAc-(DeHex-HexNAc-)Hex-(DeHex-HexNAc-(Hex-HexNAc-)Hex-)Hex-HexNAc-(DeHex-)HexNAc+Hex
					1808	1807	754.869	754.869	2	1507.72	24.63	727.459	-	-	No	0	1	105.4	0	0	FALSE	-	2-3-0-0-0		Hex-(Hex-)Hex-HexNAc-HexNAc+Hex
					1810	1807	750.956	750.956	3	2249.85	24.64	718.775	-	-	No	0	1	100.6	0	0	FALSE	-	2-3-0-0-0		Hex-(Hex-)Hex-HexNAc-HexNAc+Hex
					1812	1807	660.987	660.987	3	1979.94	24.65	466.579	-	-	No	0	1	105.36	0	0	FALSE	-	2-3-0-0-0		Hex-(Hex-)Hex-HexNAc-HexNAc+Hex	Hex-(Hex-)Hex-HexNAc-(DeHex-)HexNAc+Hex
					1814	1807	735.338	735.338	2	1468.66	24.66	700.604	-	-	No	0	1	78.28	0	0	FALSE	-	2-3-0-0-0		Hex-(Hex-)Hex-HexNAc-HexNAc+Hex
					1816	1807	897.426	897.097	3	2688.27	24.68	817.78	-	-	No	0	0.95	10.76	100	-1	TRUE	-	3-4-0-0-0	1-0-0-0-0	Hex-Hex-(Hex-)Hex-HexNAc-HexNAc+Hex1	Hex-(Hex-Hex-)Hex-HexNAc-HexNAc+Hex1
					1819	1818	903.405	903.072	3	2706.19	24.69	380.702	-	-	No	0	1	0.11	100.79	0	FALSE	-	5-4-0-0-0		HexNAc-Hex-HexNAc-Hex-(HexNAc-Hex-)Hex-HexNAc-HexNAc+Hex	Hex-HexNAc-Hex-(HexNAc-(HexNAc-)Hex-)Hex-HexNAc-HexNAc+Hex	HexNAc-Hex-HexNAc-(HexNAc-)Hex-(Hex-)Hex-HexNAc-HexNAc+Hex	Hex-HexNAc-(HexNAc-)Hex-(HexNAc-Hex-)Hex-HexNAc-HexNAc+Hex	HexNAc-(HexNAc-)Hex-(Hex-(HexNAc-)Hex-)Hex-HexNAc-HexNAc+Hex	HexNAc-(Hex-)Hex-(HexNAc-(HexNAc-)Hex-)Hex-HexNAc-HexNAc+Hex
					1821	1818	677.823	677.823	2	1353.63	24.71	651.705	-	-	No	0	1	118.6	0	0	FALSE	-	2-3-0-0-0		Hex-(Hex-)Hex-HexNAc-HexNAc+Hex
					1823	1818	671.794	671.794	2	1341.57	24.72	560.737	-	-	No	0	1	105.14	0	0	FALSE	-	2-3-0-0-0		Hex-(Hex-)Hex-HexNAc-HexNAc+Hex	Hex-(Hex-)Hex-HexNAc-(DeHex-)HexNAc+Hex
					1825	1818	700.875	700.375	2	1398.73	24.73	666.011	-	-	No	0	1	106.87	0	0	FALSE	-	2-3-0-0-0		Hex-(Hex-)Hex-HexNAc-HexNAc+Hex
					1830	1829	691.379	691.124	4	2760.47	24.76	481.482	-	-	No	0	1	109.95	0	0	FALSE	-	2-3-1-0-0		Hex-(Hex-)Hex-HexNAc-(DeHex-)HexNAc+Hex	Hex-(Hex-)Hex-HexNAc-HexNAc+Hex
					1832	1829	658.637	658.307	3	1971.9	24.78	623.016	-	-	No	0	1	122.83	0	0	FALSE	-	2-3-0-0-0		Hex-(Hex-)Hex-HexNAc-HexNAc+Hex
					1836	1829	700.875	700.377	2	1398.74	24.8	564.818	-	-	No	0	1	93.31	0	0	FALSE	-	2-3-0-0-0		Hex-(Hex-)Hex-HexNAc-HexNAc+Hex
					1838	1829	943.488	942.985	2	1883.95	24.81	830.621	-	-	No	0	1	116.54	0	0	FALSE	-	2-3-0-0-0		Hex-(Hex-)Hex-HexNAc-HexNAc+Hex	Hex-(Hex-)Hex-HexNAc-(DeHex-)HexNAc+Hex
					1841	1840	915.447	915.447	3	2743.32	24.83	954.927	-	-	No	1	0.78	163.11	0	0	FALSE	-	2-3-1-0-0		Hex-(Hex-)Hex-HexNAc-(DeHex-)HexNAc+Hex
					1843	1840	979.477	979.477	2	1956.94	24.85	1022.67	-	-	No	0	1	95.24	0	0	FALSE	-	2-3-0-0-0		Hex-(Hex-)Hex-HexNAc-HexNAc+Hex
					1845	1840	744.318	743.987	3	2228.94	24.86	480.23	-	-	No	0	1	108.91	0	0	FALSE	-	2-3-0-0-0		Hex-(Hex-)Hex-HexNAc-HexNAc+Hex
					1847	1840	1247.51	1247.02	2	2492.03	24.88	993.585	-	-	No	0	1	122.08	0.46	0	FALSE	-	2-4-0-0-0		Hex-Hex-(Hex-)Hex-HexNAc-HexNAc+Hex	Hex-(Hex-Hex-)Hex-HexNAc-HexNAc+Hex
					1849	1840	816.386	816.386	3	2446.14	24.89	599.618	-	-	No	0	1	101.36	0	0	FALSE	-	2-3-0-0-0		Hex-(Hex-)Hex-HexNAc-HexNAc+Hex
					1854	1851	821.965	821.626	3	2461.86	24.93	787.175	-	-	No	0	1	100.33	0	0	FALSE	-	2-3-0-0-0		Hex-(Hex-)Hex-HexNAc-HexNAc+Hex
					1856	1851	970.953	970.953	2	1939.89	24.94	859.615	-	-	No	0	1	108.14	0	0	FALSE	-	2-3-0-0-0		Hex-(Hex-)Hex-HexNAc-HexNAc+Hex
					1858	1851	1092.47	1092.47	2	2182.93	24.96	886.818	-	-	No	0	1	13.66	0	0	FALSE	-	2-3-0-0-0		Hex-(Hex-)Hex-HexNAc-HexNAc+Hex
					1860	1851	1056.47	1056.47	2	2110.92	24.97	1021.51	-	-	No	0	1	120.43	0	0	FALSE	-	2-3-0-0-0		Hex-(Hex-)Hex-HexNAc-HexNAc+Hex	Hex-(Hex-)Hex-HexNAc-(DeHex-)HexNAc+Hex
					1865	1862	939.917	939.417	2	1876.82	25.01	556.927	-	-	No	0	1	123.1	0	-3	TRUE	-	2-5-0-0-1	0-2-0-0-1	Hex-(Hex-)Hex-HexNAc-HexNAc+HexNAc2NeuGc1
					1867	1862	674.321	673.99	3	2018.95	25.02	560.737	-	-	No	0	1	203.08	0	0	FALSE	-	2-3-0-0-0		Hex-(Hex-)Hex-HexNAc-HexNAc+Hex	Hex-(Hex-)Hex-HexNAc-(DeHex-)HexNAc+Hex
					1869	1862	967.942	967.443	2	1932.87	25.03	669.383	-	-	No	0	1	105.95	0	0	FALSE	-	2-3-1-0-0		Hex-(Hex-)Hex-HexNAc-(DeHex-)HexNAc+Hex	Hex-(Hex-)Hex-HexNAc-HexNAc+Hex
					1874	1873	865.387	865.387	2	1728.76	25.07	847.741	-	-	No	0	1	137.73	0	0	FALSE	-	2-3-0-0-0		Hex-(Hex-)Hex-HexNAc-HexNAc+Hex
					1876	1873	956.42	955.923	2	1909.83	25.09	895.321	-	-	No	0	1	41.66	0	0	FALSE	-	2-3-0-0-0		Hex-(Hex-)Hex-HexNAc-HexNAc+Hex
					1878	1873	1013.75	1013.41	3	3037.21	25.1	565.31	-	-	No	0	1	0.33	100.58	0	FALSE	-	4-3-1-0-0		DeHex-HexNAc-Hex-(HexNAc-Hex-)Hex-HexNAc-HexNAc+Hex	DeHex-HexNAc-(HexNAc-)Hex-(Hex-)Hex-HexNAc-HexNAc+Hex
					1880	1873	1509.13	1508.62	2	3015.22	25.11	1456.5	-	-	No	0	1	100.13	0	0	FALSE	-	2-3-0-0-0		Hex-(Hex-)Hex-HexNAc-HexNAc+Hex
					1882	1873	1407.62	1407.62	2	2813.22	25.13	1272.68	-	-	No	0	1	127	0	0	FALSE	-	2-3-1-0-0		Hex-(Hex-)Hex-HexNAc-(DeHex-)HexNAc+Hex	Hex-(Hex-)Hex-HexNAc-HexNAc+Hex
					1887	1884	693.325	693.325	2	1384.63	25.16	658.254	-	-	No	0	1	115.07	0	0	FALSE	-	2-3-0-0-0		Hex-(Hex-)Hex-HexNAc-HexNAc+Hex
					1889	1884	748.286	748.286	3	2241.84	25.18	610.589	-	-	No	0	1	104.5	0	0	FALSE	-	2-3-1-0-0		Hex-(Hex-)Hex-HexNAc-(DeHex-)HexNAc+Hex
					1891	1884	731.308	731.308	3	2190.9	25.19	359.537	-	-	No	0	1	23.23	121.37	0	FALSE	-	2-5-0-0-0		Hex-Hex-(Hex-Hex-)Hex-HexNAc-HexNAc+Hex	Hex-Hex-Hex-(Hex-)Hex-HexNAc-HexNAc+Hex
					1893	1884	1019.41	1019.07	3	3054.2	25.2	631.988	-	-	No	0	1	0.82	102.42	0	FALSE	-	3-4-0-0-0		Hex-HexNAc-Hex-(Hex-)Hex-HexNAc-HexNAc+Hex	HexNAc-Hex-(Hex-Hex-)Hex-HexNAc-HexNAc+Hex	HexNAc-(Hex-)Hex-(Hex-)Hex-HexNAc-HexNAc+Hex
					1896	1895	687.669	687.338	3	2058.99	25.23	661.197	-	-	No	0	1	113.94	0	0	FALSE	-	2-3-0-0-0		Hex-(Hex-)Hex-HexNAc-HexNAc+Hex
					1898	1895	681.343	681.343	3	2041.01	25.24	525.481	-	-	No	0	1	105.12	0	0	FALSE	-	2-3-0-0-0		Hex-(Hex-)Hex-HexNAc-HexNAc+Hex	Hex-(Hex-)Hex-HexNAc-(DeHex-)HexNAc+Hex
					1900	1895	831.382	831.382	2	1660.75	25.25	778.758	-	-	No	0	1	107.81	0	0	FALSE	-	2-3-0-0-0		Hex-(Hex-)Hex-HexNAc-HexNAc+Hex
					1902	1895	705.332	705.332	3	2112.97	25.26	670.734	-	-	No	0	1	100.69	0	0	FALSE	-	2-3-0-0-0		Hex-(Hex-)Hex-HexNAc-HexNAc+Hex
					1904	1895	717.695	717.363	3	2149.07	25.27	561.789	-	-	No	0	1	104.54	0	0	FALSE	-	2-3-0-0-0		Hex-(Hex-)Hex-HexNAc-HexNAc+Hex
					1907	1906	808.309	807.975	3	2420.9	25.29	769.997	-	-	No	0	1	105.64	0	0	FALSE	-	2-3-0-0-0		Hex-(Hex-)Hex-HexNAc-HexNAc+Hex
					1909	1906	676.64	676.3	3	2025.88	25.31	573.265	-	-	No	0	1	101.56	0	0	FALSE	-	2-3-0-0-0		Hex-(Hex-)Hex-HexNAc-HexNAc+Hex	Hex-(Hex-)Hex-HexNAc-(DeHex-)HexNAc+Hex
					1911	1906	834.679	834.343	3	2500.01	25.32	677.31	-	-	No	0	1	101.83	0	0	FALSE	-	2-3-0-0-0		Hex-(Hex-)Hex-HexNAc-HexNAc+Hex
					1913	1906	1230.86	1230.52	3	3688.55	25.33	631.988	-	-	No	0	1	7.67	228.7	-2	TRUE	-	6-6-3-0-0	1-1-0-0-0	Hex-Hex-(DeHex-HexNAc-)Hex-(HexNAc-(DeHex-HexNAc-)Hex-)Hex-HexNAc-(DeHex-)HexNAc+Hex1HexNAc1
					1915	1906	769.714	769.375	3	2305.1	25.34	839.317	-	-	No	0	1	143.34	0	0	FALSE	-	2-3-1-0-0		Hex-(Hex-)Hex-HexNAc-(DeHex-)HexNAc+Hex
					1918	1917	667.306	666.969	3	1997.89	25.36	597.269	-	-	No	0	1	104.25	0	0	FALSE	-	2-3-0-0-0		Hex-(Hex-)Hex-HexNAc-HexNAc+Hex
					1920	1917	727.72	727.519	5	3632.56	25.38	625.309	-	-	No	0	1	8.04	101.09	0	FALSE	-	2-5-0-0-0		Hex-Hex-(Hex-Hex-)Hex-HexNAc-HexNAc+Hex	Hex-Hex-Hex-(Hex-)Hex-HexNAc-HexNAc+Hex
					1922	1917	652.547	652.051	4	2604.17	25.39	600.672	-	-	No	0	1	128.47	0	0	FALSE	-	2-3-0-0-0		Hex-(Hex-)Hex-HexNAc-HexNAc+Hex
					1924	1917	778.664	778.328	3	2331.96	25.4	708.14	-	-	No	0	1	128.91	0.27	0	FALSE	-	2-4-0-0-0		Hex-(Hex-Hex-)Hex-HexNAc-HexNAc+Hex	Hex-Hex-(Hex-)Hex-HexNAc-HexNAc+Hex
					1931	1928	964.743	964.071	3	2889.19	25.44	488.327	-	-	No	0	1	4.07	135.43	0	FALSE	-	2-6-1-0-0		Hex-Hex-Hex-Hex-(Hex-)Hex-HexNAc-(DeHex-)HexNAc+Hex	Hex-Hex-Hex-(Hex-Hex-)Hex-HexNAc-(DeHex-)HexNAc+Hex	Hex-Hex-(Hex-Hex-Hex-)Hex-HexNAc-(DeHex-)HexNAc+Hex
					1935	1928	824.889	823.378	2	1644.74	25.47	450.726	-	-	No	0	1	159.34	0	0	FALSE	-	2-3-0-0-0		Hex-(Hex-)Hex-HexNAc-HexNAc+Hex
					1937	1928	1167.47	1167.12	3	3498.35	25.48	859.221	-	-	No	0	1	59.98	104.02	0	FALSE	-	4-6-0-0-0		HexNAc-(HexNAc-)Hex-(Hex-Hex-Hex-Hex-)Hex-HexNAc-HexNAc+Hex	HexNAc-(Hex-HexNAc-)Hex-(Hex-Hex-Hex-)Hex-HexNAc-HexNAc+Hex	HexNAc-(HexNAc-)Hex-(Hex-(Hex-Hex-)Hex-)Hex-HexNAc-HexNAc+Hex	HexNAc-(HexNAc-)Hex-(Hex-Hex-(Hex-)Hex-)Hex-HexNAc-HexNAc+Hex	HexNAc-(Hex-HexNAc-)Hex-(Hex-(Hex-)Hex-)Hex-HexNAc-HexNAc+Hex	Hex-HexNAc-(HexNAc-)Hex-(Hex-Hex-Hex-)Hex-HexNAc-HexNAc+Hex	Hex-HexNAc-(Hex-HexNAc-)Hex-(Hex-Hex-)Hex-HexNAc-HexNAc+Hex	Hex-HexNAc-(HexNAc-)Hex-(Hex-(Hex-)Hex-)Hex-HexNAc-HexNAc+Hex	Hex-(Hex-HexNAc-)Hex-(HexNAc-(Hex-)Hex-)Hex-HexNAc-HexNAc+Hex	Hex-(Hex-HexNAc-)Hex-(Hex-HexNAc-Hex-)Hex-HexNAc-HexNAc+Hex	Hex-(HexNAc-)Hex-(HexNAc-(Hex-Hex-)Hex-)Hex-HexNAc-HexNAc+Hex	Hex-(HexNAc-)Hex-(Hex-HexNAc-(Hex-)Hex-)Hex-HexNAc-HexNAc+Hex
					1942	1939	875.362	875.362	3	2623.06	25.52	843.013	-	-	No	0	1	107.75	1.59	0	FALSE	-	2-4-0-0-0		Hex-(Hex-Hex-)Hex-HexNAc-HexNAc+Hex	Hex-Hex-(Hex-)Hex-HexNAc-HexNAc+Hex
					1944	1939	1588.15	1587.15	2	3172.29	25.53	1471.88	-	-	No	0	1	117.49	0	0	FALSE	-	2-3-0-0-0		Hex-(Hex-)Hex-HexNAc-HexNAc+Hex
					1946	1939	1066.43	1065.77	3	3194.27	25.54	503.775	-	-	No	0	0.91	68.93	344.99	-1	TRUE	-	3-11-0-0-0	0-1-0-0-0	Hex-Hex-Hex-Hex-Hex-Hex-Hex-(HexNAc-)Hex-(Hex-)Hex-HexNAc-HexNAc+HexNAc1	Hex-Hex-Hex-Hex-Hex-Hex-(Hex-HexNAc-)Hex-(Hex-)Hex-HexNAc-HexNAc+HexNAc1
					1948	1939	763.344	763.344	3	2287.01	25.55	545.402	-	-	No	0	1	131.88	0	0	FALSE	-	2-3-1-0-0		Hex-(Hex-)Hex-HexNAc-(DeHex-)HexNAc+Hex	Hex-(Hex-)Hex-HexNAc-HexNAc+Hex
					1951	1950	733.092	732.842	4	2927.34	25.57	531.72	-	-	No	0	1	126.08	2.71	0	FALSE	-	5-3-0-0-0		HexNAc-Hex-(HexNAc-(HexNAc-)Hex-)Hex-HexNAc-HexNAc+Hex	HexNAc-(HexNAc-)Hex-(HexNAc-Hex-)Hex-HexNAc-HexNAc+Hex
					1953	1950	713.313	712.809	4	2847.21	25.58	407.557	-	-	No	0	1	84.05	100	0	FALSE	-	3-3-0-0-0		HexNAc-Hex-(Hex-)Hex-HexNAc-HexNAc+Hex	Hex-(HexNAc-Hex-)Hex-HexNAc-HexNAc+Hex
					1955	1950	768.038	767.705	3	2300.09	25.59	669.383	-	-	No	0	1	110.81	0	0	FALSE	-	2-3-0-0-0		Hex-(Hex-)Hex-HexNAc-HexNAc+Hex
					1957	1950	869.685	869.018	3	2604.03	25.61	450.726	-	-	No	0	1	2.85	103.14	0	FALSE	-	2-5-1-0-0		Hex-Hex-(Hex-Hex-)Hex-HexNAc-(DeHex-)HexNAc+Hex	Hex-Hex-Hex-(Hex-)Hex-HexNAc-(DeHex-)HexNAc+Hex
					1966	1961	905.88	905.88	2	1809.74	25.66	738.647	-	-	No	0	1	110.04	0	0	FALSE	-	2-3-0-0-0		Hex-(Hex-)Hex-HexNAc-HexNAc+Hex
					1968	1961	1506.62	1506.13	2	3010.24	25.68	1470.81	-	-	No	0	1	119.75	0	0	FALSE	-	2-3-0-0-0		Hex-(Hex-)Hex-HexNAc-HexNAc+Hex
					1973	1972	664.829	664.829	2	1327.64	25.71	669.383	-	-	No	0	1	101.75	0	0	FALSE	-	2-3-0-0-0		Hex-(Hex-)Hex-HexNAc-HexNAc+Hex	Hex-(Hex-)Hex-HexNAc-(DeHex-)HexNAc+Hex
					1975	1972	800.058	799.723	3	2396.15	25.72	671.418	-	-	No	0	1	109.67	0	0	FALSE	-	2-3-0-0-0		Hex-(Hex-)Hex-HexNAc-HexNAc+Hex
					1977	1972	910.388	910.055	3	2727.14	25.73	700.305	-	-	No	0	1	107.8	0	0	FALSE	-	2-3-1-0-0		Hex-(Hex-)Hex-HexNAc-(DeHex-)HexNAc+Hex	Hex-(Hex-)Hex-HexNAc-HexNAc+Hex
					1979	1972	994.127	993.795	3	2978.36	25.74	892.534	-	-	No	0	1	221.34	0	0	FALSE	-	2-3-0-0-0		Hex-(Hex-)Hex-HexNAc-HexNAc+Hex	Hex-(Hex-)Hex-HexNAc-(DeHex-)HexNAc+Hex
					1981	1972	853.389	853.389	2	1704.76	25.75	832.441	-	-	No	0	1	143.69	0	0	FALSE	-	2-3-0-0-0		Hex-(Hex-)Hex-HexNAc-HexNAc+Hex
					1984	1983	850.048	849.714	3	2546.12	25.77	693.671	-	-	No	0	1	100.41	0	0	FALSE	-	2-3-1-0-0		Hex-(Hex-)Hex-HexNAc-(DeHex-)HexNAc+Hex
					1986	1983	949.408	949.408	2	1896.8	25.79	623.34	-	-	No	0	1	101.99	0	0	FALSE	-	2-3-1-0-0		Hex-(Hex-)Hex-HexNAc-(DeHex-)HexNAc+Hex	Hex-(Hex-)Hex-HexNAc-HexNAc+Hex
					1988	1983	813.372	813.372	2	1624.73	25.8	778.842	-	-	No	0	1	109.98	0	0	FALSE	-	2-3-1-0-0		Hex-(Hex-)Hex-HexNAc-(DeHex-)HexNAc+Hex	Hex-(Hex-)Hex-HexNAc-HexNAc+Hex
					1992	1983	1486.59	1486.59	2	2971.16	25.82	1513.93	-	-	No	0	1	112.37	0	0	FALSE	-	2-3-0-0-0		Hex-(Hex-)Hex-HexNAc-HexNAc+Hex
					1997	1994	977.12	976.787	3	2927.34	25.85	942.29	-	-	No	0	1	100.28	0	0	FALSE	-	2-3-1-0-0		Hex-(Hex-)Hex-HexNAc-(DeHex-)HexNAc+Hex	Hex-(Hex-)Hex-HexNAc-HexNAc+Hex
					1999	1994	1012.08	1011.75	3	3032.21	25.86	848.815	-	-	No	0	1	146.69	155.49	0	FALSE	-	2-6-0-0-0		Hex-Hex-Hex-Hex-(Hex-)Hex-HexNAc-HexNAc+Hex	Hex-Hex-Hex-(Hex-Hex-)Hex-HexNAc-HexNAc+Hex	Hex-Hex-(Hex-Hex-Hex-)Hex-HexNAc-HexNAc+Hex
					2001	1994	880.868	880.362	2	1758.71	25.87	787.695	-	-	No	0	1	104.42	0	0	FALSE	-	2-3-0-0-0		Hex-(Hex-)Hex-HexNAc-HexNAc+Hex
					2003	1994	670.664	670.333	3	2007.98	25.88	635.491	-	-	No	0	1	100.67	0	0	FALSE	-	2-3-0-0-0		Hex-(Hex-)Hex-HexNAc-HexNAc+Hex
					2010	2005	772.676	772.345	3	2314.01	25.93	669.383	-	-	No	0	1	117.73	0	0	FALSE	-	2-3-1-0-0		Hex-(Hex-)Hex-HexNAc-(DeHex-)HexNAc+Hex	Hex-(Hex-)Hex-HexNAc-HexNAc+Hex
					2012	2005	1023.96	1023.47	2	2044.92	25.94	719.842	-	-	No	0	1	39.98	0	0	FALSE	-	2-3-1-0-0		Hex-(Hex-)Hex-HexNAc-(DeHex-)HexNAc+Hex	Hex-(Hex-)Hex-HexNAc-HexNAc+Hex
					2014	2005	1017.4	1017.08	3	3048.21	25.95	964.248	-	-	No	0	1	106.28	0	0	FALSE	-	2-3-1-0-0		Hex-(Hex-)Hex-HexNAc-(DeHex-)HexNAc+Hex	Hex-(Hex-)Hex-HexNAc-HexNAc+Hex
					2017	2016	741.371	741.034	3	2220.08	25.97	715.067	-	-	No	0	1	103.31	0	0	FALSE	-	2-3-0-0-0		Hex-(Hex-)Hex-HexNAc-HexNAc+Hex
					2019	2016	766.048	765.715	3	2294.12	25.99	714.111	-	-	No	0	1	155.13	0	0	FALSE	-	2-3-0-0-0		Hex-(Hex-)Hex-HexNAc-HexNAc+Hex
					2021	2016	1123.97	1123.47	2	2244.93	26	625.309	-	-	No	0	1	0.2	100	0	FALSE	-	3-3-0-0-0		HexNAc-Hex-(Hex-)Hex-HexNAc-HexNAc+Hex	Hex-(HexNAc-Hex-)Hex-HexNAc-HexNAc+Hex
					2025	2016	1072.4	1072.08	3	3213.2	26.02	918.451	-	-	No	0	0.96	30.04	136.55	-1	TRUE	-	3-6-0-0-0	1-0-0-0-0	Hex-Hex-Hex-(Hex-Hex-)Hex-HexNAc-HexNAc+Hex1	Hex-Hex-(Hex-Hex-Hex-)Hex-HexNAc-HexNAc+Hex1	Hex-Hex-Hex-Hex-(Hex-)Hex-HexNAc-HexNAc+Hex1
					2028	2027	958.062	957.723	3	2870.15	26.04	848.729	-	-	No	1	0.98	270.11	0	-3	TRUE	-	2-6-0-0-0	0-3-0-0-0	Hex-(Hex-)Hex-HexNAc-HexNAc+HexNAc3
					2030	2027	926.928	926.433	2	1850.85	26.06	874.299	-	-	No	0	1	100.47	0	0	FALSE	-	2-3-0-0-0		Hex-(Hex-)Hex-HexNAc-HexNAc+Hex
					2032	2027	805.396	805.396	2	1608.78	26.07	449.214	-	-	No	0	1	111.64	0	0	FALSE	-	2-3-0-0-0		Hex-(Hex-)Hex-HexNAc-HexNAc+Hex
					2034	2027	1106.47	1106.47	3	3316.39	26.08	909.297	-	-	No	1	0.95	199.46	100.38	-1	TRUE	-	2-8-0-0-0	0-1-0-0-0	Hex-Hex-Hex-Hex-Hex-(Hex-)Hex-HexNAc-HexNAc+HexNAc1	Hex-Hex-Hex-Hex-(Hex-Hex-)Hex-HexNAc-HexNAc+HexNAc1	Hex-Hex-Hex-(Hex-Hex-Hex-)Hex-HexNAc-HexNAc+HexNAc1
					2036	2027	795.37	795.04	3	2382.1	26.1	659.056	-	-	No	0	1	130.5	0	0	FALSE	-	2-3-0-0-0		Hex-(Hex-)Hex-HexNAc-HexNAc+Hex
					2039	2038	918.896	918.896	2	1835.78	26.12	501.34	-	-	No	0	1	112.15	0	0	FALSE	-	2-3-0-0-0		Hex-(Hex-)Hex-HexNAc-HexNAc+Hex
					2041	2038	739.638	739.301	3	2214.88	26.13	799.867	-	-	No	0	1	105.1	0	0	FALSE	-	2-3-1-0-0		Hex-(Hex-)Hex-HexNAc-(DeHex-)HexNAc+Hex
					2043	2038	662.633	662.633	3	1984.88	26.14	627.445	-	-	No	0	1	100.56	0	0	FALSE	-	2-3-1-0-0		Hex-(Hex-)Hex-HexNAc-(DeHex-)HexNAc+Hex	Hex-(Hex-)Hex-HexNAc-HexNAc+Hex
					2045	2038	656.787	656.289	4	2621.13	26.15	324.65	-	-	No	0	1	5.95	265.96	0	FALSE	-	3-4-2-1-0		NeuAc-Hex-(DeHex-)HexNAc-Hex-(Hex-)Hex-HexNAc-(DeHex-)HexNAc+Hex
					2050	2049	735.678	735.343	3	2203.01	26.18	560.737	-	-	No	0	1	126.14	0	0	FALSE	-	2-3-0-0-0		Hex-(Hex-)Hex-HexNAc-HexNAc+Hex
					2052	2049	1069.09	1068.43	3	3202.26	26.2	689.853	-	-	No	0	1	34.45	144.44	0	FALSE	-	5-5-0-0-0		HexNAc-(Hex-HexNAc-)Hex-(Hex-HexNAc-Hex-)Hex-HexNAc-HexNAc+Hex	HexNAc-(HexNAc-)Hex-(Hex-HexNAc-(Hex-)Hex-)Hex-HexNAc-HexNAc+Hex	HexNAc-(Hex-HexNAc-)Hex-(HexNAc-(Hex-)Hex-)Hex-HexNAc-HexNAc+Hex	HexNAc-(HexNAc-)Hex-(HexNAc-(Hex-Hex-)Hex-)Hex-HexNAc-HexNAc+Hex
					2056	2049	792.35	792.35	2	1582.69	26.22	739.618	-	-	No	0	1	113.55	0	0	FALSE	-	2-3-0-0-0		Hex-(Hex-)Hex-HexNAc-HexNAc+Hex
					2058	2049	803.343	803.343	2	1604.67	26.23	449.214	-	-	No	0	1	118.91	0	0	FALSE	-	2-3-0-0-0		Hex-(Hex-)Hex-HexNAc-HexNAc+Hex
					2061	2060	678.301	677.964	3	2030.87	26.25	561.294	-	-	No	0	1	108.34	0	0	FALSE	-	2-3-0-0-0		Hex-(Hex-)Hex-HexNAc-HexNAc+Hex
					2063	2060	707.348	706.676	3	2117.01	26.26	496.233	-	-	No	0	1	100.48	0	0	FALSE	-	2-3-0-0-0		Hex-(Hex-)Hex-HexNAc-HexNAc+Hex	Hex-(Hex-)Hex-HexNAc-(DeHex-)HexNAc+Hex
					2065	2060	757.308	756.978	3	2267.91	26.27	547.259	-	-	No	0	1	110.4	0	0	FALSE	-	2-3-0-0-0		Hex-(Hex-)Hex-HexNAc-HexNAc+Hex
					2069	2060	932.16	931.911	4	3723.61	26.29	544.266	-	-	No	0	1	0.98	157.31	0	FALSE	-	5-6-0-0-0		Hex-HexNAc-(HexNAc-)Hex-(HexNAc-(Hex-Hex-)Hex-)Hex-HexNAc-HexNAc+Hex	Hex-HexNAc-Hex-HexNAc-(Hex-HexNAc-)Hex-(Hex-)Hex-HexNAc-HexNAc+Hex	Hex-HexNAc-(Hex-HexNAc-)Hex-(HexNAc-(Hex-)Hex-)Hex-HexNAc-HexNAc+Hex	Hex-HexNAc-Hex-HexNAc-Hex-(Hex-HexNAc-Hex-)Hex-HexNAc-HexNAc+Hex	Hex-HexNAc-Hex-HexNAc-Hex-HexNAc-Hex-(Hex-)Hex-HexNAc-HexNAc+Hex	HexNAc-Hex-HexNAc-Hex-(HexNAc-(Hex-Hex-)Hex-)Hex-HexNAc-HexNAc+Hex	Hex-HexNAc-(HexNAc-)Hex-(Hex-HexNAc-(Hex-)Hex-)Hex-HexNAc-HexNAc+Hex	HexNAc-Hex-HexNAc-Hex-(Hex-HexNAc-(Hex-)Hex-)Hex-HexNAc-HexNAc+Hex	Hex-HexNAc-Hex-HexNAc-Hex-(HexNAc-(Hex-)Hex-)Hex-HexNAc-HexNAc+Hex	Hex-HexNAc-(Hex-HexNAc-)Hex-(Hex-HexNAc-Hex-)Hex-HexNAc-HexNAc+Hex
					2072	2071	672.327	672.327	3	2013.96	26.31	468.881	-	-	No	0	1	114.35	0	0	FALSE	-	2-3-1-0-0		Hex-(Hex-)Hex-HexNAc-(DeHex-)HexNAc+Hex
					2076	2071	783.855	783.855	2	1565.69	26.34	766.747	-	-	No	0	1	114.96	0	0	FALSE	-	2-3-0-0-0		Hex-(Hex-)Hex-HexNAc-HexNAc+Hex
					2078	2071	1050.83	1050.51	3	3148.5	26.35	1115.94	-	-	No	0	1	104.8	0	0	FALSE	-	2-3-1-0-0		Hex-(Hex-)Hex-HexNAc-(DeHex-)HexNAc+Hex	Hex-(Hex-)Hex-HexNAc-HexNAc+Hex
					2080	2071	699.986	699.655	3	2095.94	26.36	665.536	-	-	No	0	1	69.12	0	0	FALSE	-	2-3-0-0-0		Hex-(Hex-)Hex-HexNAc-HexNAc+Hex
					2083	2082	774.865	774.865	2	1547.72	26.38	634.349	-	-	No	0	1	119.95	0	0	FALSE	-	2-3-0-0-0		Hex-(Hex-)Hex-HexNAc-HexNAc+Hex
					2087	2082	1520.63	1520.63	2	3039.24	26.41	1470.87	-	-	No	0	1	119.47	0	0	FALSE	-	2-3-0-0-0		Hex-(Hex-)Hex-HexNAc-HexNAc+Hex
					2091	2082	788.127	787.878	4	3147.48	26.43	523.002	-	-	No	0	1	6.74	106.39	0	FALSE	-	2-5-0-0-0		Hex-Hex-Hex-(Hex-)Hex-HexNAc-HexNAc+Hex	Hex-Hex-(Hex-Hex-)Hex-HexNAc-HexNAc+Hex
					2094	2093	929.944	929.944	2	1857.87	26.45	731.525	-	-	No	0	1	271.31	0	0	FALSE	-	2-3-0-0-0		Hex-(Hex-)Hex-HexNAc-HexNAc+Hex
					2096	2093	802.384	801.378	2	1600.74	26.46	785.72	-	-	No	0	1	120.28	0	0	FALSE	-	2-3-1-0-0		Hex-(Hex-)Hex-HexNAc-(DeHex-)HexNAc+Hex
					2102	2093	754.652	754.319	3	2259.93	26.5	387.43	-	-	No	0	1	1.76	100	0	FALSE	-	2-4-1-0-0		Hex-(Hex-Hex-)Hex-HexNAc-(DeHex-)HexNAc+Hex	Hex-Hex-(Hex-)Hex-HexNAc-(DeHex-)HexNAc+Hex
					2107	2104	785.849	785.849	2	1569.68	26.54	751.598	-	-	No	0	1	103.56	0	0	FALSE	-	2-3-0-0-0		Hex-(Hex-)Hex-HexNAc-HexNAc+Hex
					2111	2104	780.366	780.366	2	1558.72	26.56	744.854	-	-	No	0	1	104.92	0	0	FALSE	-	2-3-0-0-0		Hex-(Hex-)Hex-HexNAc-HexNAc+Hex
					2113	2104	1007.98	1007.98	2	2013.94	26.57	879.807	-	-	No	0	1	159.37	0	0	FALSE	-	2-3-0-0-0		Hex-(Hex-)Hex-HexNAc-HexNAc+Hex
					2116	2115	690.955	690.622	3	2068.84	26.6	656.097	-	-	No	0	1	100.85	0	0	FALSE	-	2-3-1-0-0		Hex-(Hex-)Hex-HexNAc-(DeHex-)HexNAc+Hex	Hex-(Hex-)Hex-HexNAc-HexNAc+Hex
					2118	2115	1014.09	1013.75	3	3038.22	26.61	492.921	-	-	No	0	1	104.13	119.52	0	FALSE	-	3-7-0-0-1		Hex-Hex-Hex-(NeuGc-Hex-HexNAc-)Hex-(Hex-)Hex-HexNAc-HexNAc+Hex
					2120	2115	856.361	856.361	3	2566.06	26.62	884.891	-	-	No	0	1	107.51	0	0	FALSE	-	2-3-0-0-0		Hex-(Hex-)Hex-HexNAc-HexNAc+Hex	Hex-(Hex-)Hex-HexNAc-(DeHex-)HexNAc+Hex
					2122	2115	685.637	685.304	3	2052.89	26.64	387.43	-	-	No	0	1	100.67	0.59	0	FALSE	-	3-3-1-0-0		DeHex-HexNAc-Hex-(Hex-)Hex-HexNAc-HexNAc+Hex
					2127	2126	749.984	749.649	3	2245.93	26.67	539.376	-	-	No	0	1	102.04	0	0	FALSE	-	2-3-0-0-0		Hex-(Hex-)Hex-HexNAc-HexNAc+Hex	Hex-(Hex-)Hex-HexNAc-(DeHex-)HexNAc+Hex
					2129	2126	694.825	694.575	4	2774.27	26.68	625.309	-	-	No	0	1	123.45	0	0	FALSE	-	2-3-0-0-0		Hex-(Hex-)Hex-HexNAc-HexNAc+Hex
					2131	2126	1307.03	1306.53	2	2611.05	26.69	909.512	-	-	No	0	1	114.34	2.08	0	FALSE	-	3-4-0-0-0		HexNAc-Hex-(Hex-Hex-)Hex-HexNAc-HexNAc+Hex	HexNAc-(Hex-)Hex-(Hex-)Hex-HexNAc-HexNAc+Hex	Hex-HexNAc-Hex-(Hex-)Hex-HexNAc-HexNAc+Hex
					2133	2126	894.378	894.044	3	2679.11	26.71	672.649	-	-	No	0	1	58.58	147.9	0	FALSE	-	2-6-0-0-0		Hex-Hex-(Hex-Hex-Hex-)Hex-HexNAc-HexNAc+Hex	Hex-Hex-Hex-(Hex-Hex-)Hex-HexNAc-HexNAc+Hex	Hex-Hex-Hex-Hex-(Hex-)Hex-HexNAc-HexNAc+Hex
					2135	2126	865.405	864.743	3	2591.21	26.72	830.002	-	-	No	0	1	102.49	0	0	FALSE	-	2-3-0-0-0		Hex-(Hex-)Hex-HexNAc-HexNAc+Hex
					2138	2137	702.769	702.269	2	1402.52	26.74	668.462	-	-	No	0	1	111.74	0	0	FALSE	-	2-3-0-0-0		Hex-(Hex-)Hex-HexNAc-HexNAc+Hex
					2140	2137	1075.24	1075.24	4	4296.91	26.75	657.39	-	-	No	0	1	91.85	81.08	0	FALSE	-	4-4-2-0-0		Hex-HexNAc-Hex-(DeHex-HexNAc-Hex-)Hex-HexNAc-(DeHex-)HexNAc+Hex	Hex-HexNAc-(DeHex-HexNAc-)Hex-(Hex-)Hex-HexNAc-(DeHex-)HexNAc+Hex	Hex-(DeHex-)HexNAc-(HexNAc-)Hex-(Hex-)Hex-HexNAc-(DeHex-)HexNAc+Hex	HexNAc-(Hex-)Hex-(DeHex-HexNAc-Hex-)Hex-HexNAc-(DeHex-)HexNAc+Hex	DeHex-HexNAc-(Hex-)Hex-(HexNAc-Hex-)Hex-HexNAc-(DeHex-)HexNAc+Hex	Hex-(DeHex-HexNAc-)Hex-(HexNAc-Hex-)Hex-HexNAc-(DeHex-)HexNAc+Hex	HexNAc-Hex-(DeHex-)HexNAc-Hex-(Hex-)Hex-HexNAc-(DeHex-)HexNAc+Hex	DeHex-HexNAc-(HexNAc-)Hex-(Hex-Hex-)Hex-HexNAc-(DeHex-)HexNAc+Hex	HexNAc-(DeHex-HexNAc-)Hex-(Hex-Hex-)Hex-HexNAc-(DeHex-)HexNAc+Hex	Hex-(HexNAc-)Hex-(DeHex-HexNAc-Hex-)Hex-HexNAc-(DeHex-)HexNAc+Hex	Hex-(DeHex-)HexNAc-Hex-(HexNAc-Hex-)Hex-HexNAc-(DeHex-)HexNAc+Hex	DeHex-HexNAc-Hex-HexNAc-Hex-(Hex-)Hex-HexNAc-(DeHex-)HexNAc+Hex
					2142	2137	984.417	984.084	3	2949.23	26.76	807.209	-	-	No	1	1	195.92	60.05	-1	TRUE	-	2-7-0-0-0	0-1-0-0-0	Hex-Hex-Hex-Hex-(Hex-)Hex-HexNAc-HexNAc+HexNAc1	Hex-Hex-Hex-(Hex-Hex-)Hex-HexNAc-HexNAc+HexNAc1	Hex-Hex-(Hex-Hex-Hex-)Hex-HexNAc-HexNAc+HexNAc1
					2146	2137	688.249	688.249	2	1374.48	26.79	635.506	-	-	No	0	1	106.87	0	0	FALSE	-	2-3-0-0-0		Hex-(Hex-)Hex-HexNAc-HexNAc+Hex
					2149	2148	992.144	991.809	3	2972.41	26.81	1281.8	-	-	No	0	1	100.79	0	0	FALSE	-	2-3-0-0-0		Hex-(Hex-)Hex-HexNAc-HexNAc+Hex
					2151	2148	1395.1	1394.6	2	2787.18	26.83	807.226	-	-	No	0	0.98	204.52	133.41	-1	TRUE	-	2-6-0-0-0	0-1-0-0-0	Hex-Hex-Hex-(Hex-)Hex-HexNAc-HexNAc+HexNAc1	Hex-Hex-(Hex-Hex-)Hex-HexNAc-HexNAc+HexNAc1
					2155	2148	1035.43	1035.43	2	2068.85	26.85	999.789	-	-	No	0	1	3.13	0	0	FALSE	-	2-3-0-0-0		Hex-(Hex-)Hex-HexNAc-HexNAc+Hex
					2157	2148	832.867	832.622	4	3326.46	26.86	661.53	-	-	No	0	1	72.34	111.42	0	FALSE	-	3-5-0-0-0		Hex-HexNAc-(Hex-)Hex-(Hex-)Hex-HexNAc-HexNAc+Hex	HexNAc-(Hex-Hex-)Hex-(Hex-)Hex-HexNAc-HexNAc+Hex	HexNAc-(Hex-)Hex-(Hex-Hex-)Hex-HexNAc-HexNAc+Hex	Hex-HexNAc-Hex-(Hex-Hex-)Hex-HexNAc-HexNAc+Hex	HexNAc-Hex-(Hex-(Hex-)Hex-)Hex-HexNAc-HexNAc+Hex	HexNAc-Hex-(Hex-Hex-Hex-)Hex-HexNAc-HexNAc+Hex
					2160	2159	651.638	651.638	3	1951.89	26.88	598.78	-	-	No	0	1	109.1	0	0	FALSE	-	2-3-0-0-0		Hex-(Hex-)Hex-HexNAc-HexNAc+Hex	Hex-(Hex-)Hex-HexNAc-(DeHex-)HexNAc+Hex
					2164	2159	1059.42	1059.09	3	3174.25	26.91	432.53	-	-	No	0	1	3.68	222.72	-1	TRUE	-	6-8-0-0-0	1-0-0-0-0	Hex-HexNAc-(Hex-Hex-)Hex-(Hex-HexNAc-Hex-HexNAc-Hex-)Hex-HexNAc-HexNAc+Hex1	HexNAc-Hex-HexNAc-(HexNAc-)Hex-(Hex-Hex-Hex-(Hex-)Hex-)Hex-HexNAc-HexNAc+Hex1	HexNAc-Hex-HexNAc-(HexNAc-)Hex-(Hex-Hex-(Hex-Hex-)Hex-)Hex-HexNAc-HexNAc+Hex1	HexNAc-Hex-HexNAc-(HexNAc-)Hex-(Hex-Hex-Hex-Hex-Hex-)Hex-HexNAc-HexNAc+Hex1	Hex-HexNAc-Hex-HexNAc-(Hex-Hex-)Hex-(Hex-(HexNAc-)Hex-)Hex-HexNAc-HexNAc+Hex1	Hex-HexNAc-Hex-HexNAc-(Hex-)Hex-(Hex-Hex-(HexNAc-)Hex-)Hex-HexNAc-HexNAc+Hex1	Hex-HexNAc-Hex-HexNAc-(Hex-)Hex-(Hex-(Hex-HexNAc-)Hex-)Hex-HexNAc-HexNAc+Hex1	HexNAc-Hex-HexNAc-(Hex-Hex-Hex-)Hex-(Hex-(HexNAc-)Hex-)Hex-HexNAc-HexNAc+Hex1	HexNAc-Hex-HexNAc-(Hex-Hex-)Hex-(Hex-Hex-(HexNAc-)Hex-)Hex-HexNAc-HexNAc+Hex1	HexNAc-Hex-HexNAc-(Hex-Hex-)Hex-(Hex-(Hex-HexNAc-)Hex-)Hex-HexNAc-HexNAc+Hex1	HexNAc-Hex-HexNAc-(Hex-)Hex-(Hex-Hex-Hex-(HexNAc-)Hex-)Hex-HexNAc-HexNAc+Hex1	HexNAc-Hex-HexNAc-(Hex-)Hex-(Hex-Hex-(Hex-HexNAc-)Hex-)Hex-HexNAc-HexNAc+Hex1	Hex-HexNAc-Hex-HexNAc-(Hex-)Hex-(Hex-HexNAc-(Hex-)Hex-)Hex-HexNAc-HexNAc+Hex1	HexNAc-Hex-HexNAc-(Hex-Hex-)Hex-(Hex-HexNAc-(Hex-)Hex-)Hex-HexNAc-HexNAc+Hex1	HexNAc-Hex-HexNAc-(Hex-)Hex-(Hex-HexNAc-(Hex-Hex-)Hex-)Hex-HexNAc-HexNAc+Hex1	Hex-HexNAc-Hex-HexNAc-Hex-(Hex-Hex-Hex-(HexNAc-)Hex-)Hex-HexNAc-HexNAc+Hex1	Hex-HexNAc-Hex-HexNAc-Hex-(Hex-Hex-(Hex-HexNAc-)Hex-)Hex-HexNAc-HexNAc+Hex1	Hex-HexNAc-Hex-HexNAc-Hex-(Hex-HexNAc-(Hex-Hex-)Hex-)Hex-HexNAc-HexNAc+Hex1	Hex-Hex-Hex-Hex-(HexNAc-)Hex-(HexNAc-Hex-HexNAc-Hex-)Hex-HexNAc-HexNAc+Hex1	Hex-Hex-Hex-(Hex-HexNAc-)Hex-(HexNAc-Hex-HexNAc-Hex-)Hex-HexNAc-HexNAc+Hex1	Hex-Hex-Hex-(HexNAc-)Hex-(HexNAc-Hex-HexNAc-(Hex-)Hex-)Hex-HexNAc-HexNAc+Hex1	Hex-Hex-Hex-(HexNAc-)Hex-(Hex-HexNAc-Hex-HexNAc-Hex-)Hex-HexNAc-HexNAc+Hex1	Hex-Hex-(Hex-HexNAc-)Hex-(HexNAc-Hex-HexNAc-(Hex-)Hex-)Hex-HexNAc-HexNAc+Hex1	Hex-Hex-(Hex-HexNAc-)Hex-(Hex-HexNAc-Hex-HexNAc-Hex-)Hex-HexNAc-HexNAc+Hex1	Hex-HexNAc-(Hex-Hex-Hex-)Hex-(HexNAc-Hex-HexNAc-Hex-)Hex-HexNAc-HexNAc+Hex1
					2166	2159	823.369	823.369	4	3289.45	26.92	567.799	-	-	No	0	1	103.87	7.95	0	FALSE	-	4-5-1-0-0		DeHex-HexNAc-(HexNAc-)Hex-(Hex-(Hex-)Hex-)Hex-HexNAc-HexNAc+Hex	DeHex-HexNAc-(HexNAc-)Hex-(Hex-Hex-Hex-)Hex-HexNAc-HexNAc+Hex	DeHex-HexNAc-(Hex-)Hex-(Hex-(HexNAc-)Hex-)Hex-HexNAc-HexNAc+Hex	DeHex-HexNAc-Hex-(Hex-Hex-(HexNAc-)Hex-)Hex-HexNAc-HexNAc+Hex	DeHex-HexNAc-Hex-(Hex-(Hex-HexNAc-)Hex-)Hex-HexNAc-HexNAc+Hex	DeHex-HexNAc-(Hex-HexNAc-)Hex-(Hex-Hex-)Hex-HexNAc-HexNAc+Hex
					2168	2159	828.721	828.389	3	2482.15	26.94	447.559	-	-	No	0	1	14.25	101.47	-2	TRUE	-	5-3-0-1-0	1-0-0-1-0	HexNAc-(HexNAc-)Hex-(Hex-)Hex-HexNAc-HexNAc+Hex1NeuAc1	HexNAc-Hex-(HexNAc-Hex-)Hex-HexNAc-HexNAc+Hex1NeuAc1
					2171	2170	821.148	820.898	4	3279.56	26.96	673.317	-	-	No	0	1	100.23	0	0	FALSE	-	2-3-0-0-0		Hex-(Hex-)Hex-HexNAc-HexNAc+Hex
					2173	2170	666.677	666.677	3	1997.01	26.97	622.301	-	-	No	0	1	126.52	0	0	FALSE	-	2-3-0-0-0		Hex-(Hex-)Hex-HexNAc-HexNAc+Hex
					2175	2170	810.727	810.401	3	2428.18	26.98	544.304	-	-	No	0	1	198.26	0	0	FALSE	-	2-3-0-0-0		Hex-(Hex-)Hex-HexNAc-HexNAc+Hex
					2177	2170	680.99	680.651	3	2038.93	27	628.576	-	-	No	0	1	106.67	0	0	FALSE	-	2-3-0-0-0		Hex-(Hex-)Hex-HexNAc-HexNAc+Hex
					2182	2181	763.024	762.69	3	2285.05	27.03	688.519	-	-	No	0	1	121.15	0	0	FALSE	-	2-3-0-0-0		Hex-(Hex-)Hex-HexNAc-HexNAc+Hex
					2184	2181	1231.91	1231.25	3	3690.72	27.04	1040.56	-	-	No	0	1	126.76	0	0	FALSE	-	2-3-0-0-0		Hex-(Hex-)Hex-HexNAc-HexNAc+Hex
					2186	2181	1344.07	1343.57	2	2685.13	27.06	478.002	-	-	No	0	1	5.89	114.3	0	FALSE	-	3-6-0-0-1		NeuGc-Hex-HexNAc-Hex-(Hex-Hex-Hex-)Hex-HexNAc-HexNAc+Hex	Hex-Hex-Hex-(NeuGc-Hex-HexNAc-Hex-)Hex-HexNAc-HexNAc+Hex	NeuGc-Hex-HexNAc-(Hex-Hex-)Hex-(Hex-)Hex-HexNAc-HexNAc+Hex	NeuGc-Hex-HexNAc-(Hex-)Hex-(Hex-Hex-)Hex-HexNAc-HexNAc+Hex	Hex-Hex-(NeuGc-Hex-HexNAc-)Hex-(Hex-)Hex-HexNAc-HexNAc+Hex	NeuGc-Hex-HexNAc-Hex-(Hex-(Hex-)Hex-)Hex-HexNAc-HexNAc+Hex	Hex-(Hex-)Hex-(NeuGc-Hex-HexNAc-Hex-)Hex-HexNAc-HexNAc+Hex
					2190	2181	1356.09	1355.59	2	2709.16	27.08	512.162	-	-	No	0	1	154.17	76.38	0	FALSE	-	3-6-0-0-0		Hex-Hex-(Hex-HexNAc-)Hex-(Hex-)Hex-HexNAc-HexNAc+Hex	Hex-Hex-Hex-(HexNAc-)Hex-(Hex-)Hex-HexNAc-HexNAc+Hex	Hex-Hex-(HexNAc-)Hex-(Hex-Hex-)Hex-HexNAc-HexNAc+Hex	Hex-HexNAc-(Hex-Hex-)Hex-(Hex-)Hex-HexNAc-HexNAc+Hex
					2193	2192	672.322	670.656	3	2008.95	27.1	591.043	-	-	No	0	1	123.87	0	0	FALSE	-	2-3-0-0-0		Hex-(Hex-)Hex-HexNAc-HexNAc+Hex	Hex-(Hex-)Hex-HexNAc-(DeHex-)HexNAc+Hex
					2195	2192	730.348	730.348	3	2188.02	27.12	695.472	-	-	No	0	1	101.66	0	0	FALSE	-	2-3-1-0-0		Hex-(Hex-)Hex-HexNAc-(DeHex-)HexNAc+Hex
					2204	2203	1224.59	1223.91	3	3668.72	27.18	1320.68	-	-	No	0	1	202.63	0	0	FALSE	-	2-3-0-0-0		Hex-(Hex-)Hex-HexNAc-HexNAc+Hex	Hex-(Hex-)Hex-HexNAc-(DeHex-)HexNAc+Hex
					2206	2203	1115.16	1114.49	3	3340.46	27.19	884.891	-	-	No	0	1	5.85	104.49	0	FALSE	-	4-4-1-0-0		HexNAc-(DeHex-HexNAc-)Hex-(Hex-Hex-)Hex-HexNAc-HexNAc+Hex	DeHex-HexNAc-(HexNAc-)Hex-(Hex-Hex-)Hex-HexNAc-HexNAc+Hex	Hex-(DeHex-HexNAc-)Hex-(HexNAc-Hex-)Hex-HexNAc-HexNAc+Hex	Hex-(HexNAc-)Hex-(DeHex-HexNAc-Hex-)Hex-HexNAc-HexNAc+Hex
					2208	2203	710.011	709.677	3	2126.01	27.2	951.317	-	-	No	0	1	100.25	0	0	FALSE	-	2-3-0-0-0		Hex-(Hex-)Hex-HexNAc-HexNAc+Hex
					2210	2203	797.456	797.456	2	1592.9	27.21	567.799	-	-	No	0	1	111.4	0	0	FALSE	-	2-3-0-0-0		Hex-(Hex-)Hex-HexNAc-HexNAc+Hex
					2212	2203	744.002	743.343	3	2227.01	27.22	709.156	-	-	No	0	1	101.36	0	0	FALSE	-	2-3-0-0-0		Hex-(Hex-)Hex-HexNAc-HexNAc+Hex
					2215	2214	954.401	954.401	2	1906.79	27.24	1106.03	-	-	No	0	1	93.71	0	0	FALSE	-	2-3-0-0-0		Hex-(Hex-)Hex-HexNAc-HexNAc+Hex
					2217	2214	675.31	675.31	3	2022.91	27.26	622.062	-	-	No	0	1	105.29	0	0	FALSE	-	2-3-0-0-0		Hex-(Hex-)Hex-HexNAc-HexNAc+Hex	Hex-(Hex-)Hex-HexNAc-(DeHex-)HexNAc+Hex
					2219	2214	720.36	720.02	3	2157.04	27.27	685.698	-	-	No	0	1	102.53	0	0	FALSE	-	2-3-0-0-0		Hex-(Hex-)Hex-HexNAc-HexNAc+Hex
					2221	2214	853.918	853.918	2	1705.82	27.28	802.681	-	-	No	0	1	5.5	0	0	FALSE	-	2-3-0-0-0		Hex-(Hex-)Hex-HexNAc-HexNAc+Hex
					2223	2214	789.411	789.411	3	2365.21	27.29	677.31	-	-	No	0	1	129.7	0	-2	TRUE	-	2-5-0-0-0	0-2-0-0-0	Hex-(Hex-)Hex-HexNAc-HexNAc+HexNAc2
					2228	2225	811.909	811.909	2	1621.8	27.33	639.359	-	-	No	0	1	167.48	0	0	FALSE	-	2-3-0-0-0		Hex-(Hex-)Hex-HexNAc-HexNAc+Hex
					2230	2225	912.449	912.115	3	2733.32	27.34	900.54	-	-	No	0	1	112.97	0	0	FALSE	-	2-3-0-0-0		Hex-(Hex-)Hex-HexNAc-HexNAc+Hex
					2232	2225	965.462	965.462	2	1928.91	27.35	684.815	-	-	No	0	1	104.79	0	0	FALSE	-	2-3-0-0-0		Hex-(Hex-)Hex-HexNAc-HexNAc+Hex	Hex-(Hex-)Hex-HexNAc-(DeHex-)HexNAc+Hex
					2234	2225	1314.58	1313.58	2	2625.14	27.36	807.251	-	-	No	0	0.95	241.34	100	-1	TRUE	-	2-5-0-0-0	0-1-0-0-0	Hex-Hex-(Hex-)Hex-HexNAc-HexNAc+HexNAc1	Hex-(Hex-Hex-)Hex-HexNAc-HexNAc+HexNAc1
					2237	2236	977.134	976.8	3	2927.38	27.38	1106.03	-	-	No	0	1	101.34	0	0	FALSE	-	2-3-0-0-0		Hex-(Hex-)Hex-HexNAc-HexNAc+Hex
					2239	2236	880.414	880.08	3	2637.22	27.39	501.565	-	-	No	0	1	100.2	0.33	0	FALSE	-	4-3-0-0-0		HexNAc-(HexNAc-)Hex-(Hex-)Hex-HexNAc-HexNAc+Hex	HexNAc-Hex-(HexNAc-Hex-)Hex-HexNAc-HexNAc+Hex
					2241	2236	960.451	960.116	3	2877.32	27.4	696.37	-	-	No	0	1	100.2	0	0	FALSE	-	2-3-0-0-0		Hex-(Hex-)Hex-HexNAc-HexNAc+Hex
					2243	2236	868.445	867.941	2	1733.87	27.41	841.874	-	-	No	0	1	27.83	0	0	FALSE	-	2-3-0-0-0		Hex-(Hex-)Hex-HexNAc-HexNAc+Hex
					2245	2236	909.439	909.109	3	2724.3	27.42	347.523	-	-	No	0	1	11.42	118.44	0	FALSE	-	4-3-2-0-0		DeHex-HexNAc-(HexNAc-)Hex-(Hex-)Hex-HexNAc-(DeHex-)HexNAc+Hex	DeHex-HexNAc-Hex-(HexNAc-Hex-)Hex-HexNAc-(DeHex-)HexNAc+Hex
					2248	2247	889.104	888.769	3	2663.28	27.44	947.479	-	-	No	0	1	103.35	0	0	FALSE	-	2-3-0-0-0		Hex-(Hex-)Hex-HexNAc-HexNAc+Hex
					2250	2247	746.036	745.699	3	2234.08	27.46	480.23	-	-	No	0	1	125.68	0	0	FALSE	-	2-3-1-0-0		Hex-(Hex-)Hex-HexNAc-(DeHex-)HexNAc+Hex	Hex-(Hex-)Hex-HexNAc-HexNAc+Hex
					2252	2247	1242.48	1242.23	4	4964.9	27.47	1207.19	-	-	No	0	1	113.9	28.65	0	FALSE	-	3-5-0-0-0		Hex-Hex-(HexNAc-(Hex-)Hex-)Hex-HexNAc-HexNAc+Hex	Hex-Hex-(Hex-HexNAc-Hex-)Hex-HexNAc-HexNAc+Hex	Hex-(Hex-)Hex-(HexNAc-Hex-)Hex-HexNAc-HexNAc+Hex
					2254	2247	1263.05	1262.55	2	2523.09	27.48	1117.69	-	-	No	0	1	113.53	0.12	0	FALSE	-	2-4-0-0-0		Hex-Hex-(Hex-)Hex-HexNAc-HexNAc+Hex	Hex-(Hex-Hex-)Hex-HexNAc-HexNAc+Hex
					2261	2258	808.896	808.896	2	1615.78	27.53	773.241	-	-	No	0	1	102.81	0	0	FALSE	-	2-3-0-0-0		Hex-(Hex-)Hex-HexNAc-HexNAc+Hex
					2263	2258	717.325	717.325	3	2148.95	27.55	451.876	-	-	No	0	1	104.31	0	0	FALSE	-	2-3-0-0-0		Hex-(Hex-)Hex-HexNAc-HexNAc+Hex	Hex-(Hex-)Hex-HexNAc-(DeHex-)HexNAc+Hex
					2267	2258	971.467	970.815	3	2909.42	27.58	936.137	-	-	No	0	1	117.18	0	0	FALSE	-	2-3-0-0-0		Hex-(Hex-)Hex-HexNAc-HexNAc+Hex	Hex-(Hex-)Hex-HexNAc-(DeHex-)HexNAc+Hex
					2270	2269	712.134	711.732	5	3553.62	27.6	451.876	-	-	No	0	1	7.54	126.63	0	FALSE	-	2-8-1-0-0		Hex-Hex-Hex-(Hex-Hex-Hex-Hex-)Hex-HexNAc-(DeHex-)HexNAc+Hex	Hex-Hex-Hex-Hex-Hex-(Hex-Hex-)Hex-HexNAc-(DeHex-)HexNAc+Hex	Hex-Hex-Hex-Hex-Hex-Hex-(Hex-)Hex-HexNAc-(DeHex-)HexNAc+Hex	Hex-Hex-Hex-Hex-(Hex-Hex-Hex-)Hex-HexNAc-(DeHex-)HexNAc+Hex
					2272	2269	732.855	732.855	4	2927.39	27.61	523.002	-	-	No	0	1	117.5	26.87	0	FALSE	-	2-6-0-0-0		Hex-Hex-Hex-Hex-(Hex-)Hex-HexNAc-HexNAc+Hex	Hex-Hex-Hex-(Hex-Hex-)Hex-HexNAc-HexNAc+Hex	Hex-Hex-(Hex-Hex-Hex-)Hex-HexNAc-HexNAc+Hex
					2274	2269	767.42	767.086	3	2298.24	27.62	731.797	-	-	No	0	1	114.47	0	0	FALSE	-	2-3-0-0-0		Hex-(Hex-)Hex-HexNAc-HexNAc+Hex	Hex-(Hex-)Hex-HexNAc-(DeHex-)HexNAc+Hex
					2276	2269	724.002	723.33	3	2166.97	27.64	810.379	-	-	No	0	1	109.87	0	0	FALSE	-	2-3-0-0-0		Hex-(Hex-)Hex-HexNAc-HexNAc+Hex
					2278	2269	1054.46	1053.96	2	2105.91	27.65	1376.7	-	-	No	0	1	102.8	0	0	FALSE	-	2-3-0-0-0		Hex-(Hex-)Hex-HexNAc-HexNAc+Hex
					2281	2280	758.676	758.676	3	2273.01	27.67	724.071	-	-	No	0	1	103.78	0	0	FALSE	-	2-3-0-0-0		Hex-(Hex-)Hex-HexNAc-HexNAc+Hex
					2285	2280	918.442	918.188	4	3668.72	27.69	454.242	-	-	No	0	1	7.1	191.31	0	FALSE	-	4-6-2-1-0		NeuAc-Hex-HexNAc-Hex-Hex-(DeHex-HexNAc-)Hex-(Hex-)Hex-HexNAc-(DeHex-)HexNAc+Hex	DeHex-HexNAc-(Hex-Hex-)Hex-(NeuAc-Hex-HexNAc-Hex-)Hex-HexNAc-(DeHex-)HexNAc+Hex	NeuAc-Hex-HexNAc-Hex-Hex-Hex-(DeHex-HexNAc-Hex-)Hex-HexNAc-(DeHex-)HexNAc+Hex
					2287	2280	738.849	738.34	4	2949.33	27.7	703.816	-	-	No	0	1	194.08	0	0	FALSE	-	2-3-0-0-0		Hex-(Hex-)Hex-HexNAc-HexNAc+Hex
					2289	2280	1127.47	1126.98	2	2251.94	27.71	345.43	-	-	No	0	1	0.74	33.75	0	FALSE	-	5-4-0-0-0		HexNAc-(HexNAc-)Hex-(Hex-(HexNAc-)Hex-)Hex-HexNAc-HexNAc+Hex	Hex-(HexNAc-)Hex-(HexNAc-(HexNAc-)Hex-)Hex-HexNAc-HexNAc+Hex
					2292	2291	844.755	844.424	3	2530.25	27.73	832.665	-	-	No	0	1	115.7	0	0	FALSE	-	2-3-1-0-0		Hex-(Hex-)Hex-HexNAc-(DeHex-)HexNAc+Hex	Hex-(Hex-)Hex-HexNAc-HexNAc+Hex
					2294	2291	773.342	772.841	2	1543.67	27.75	556.927	-	-	No	0	1	107.15	0	0	FALSE	-	2-3-0-0-0		Hex-(Hex-)Hex-HexNAc-HexNAc+Hex	Hex-(Hex-)Hex-HexNAc-(DeHex-)HexNAc+Hex
					2300	2291	876.387	876.387	2	1750.76	27.78	841.908	-	-	No	0	1	106.56	0	0	FALSE	-	2-3-1-0-0		Hex-(Hex-)Hex-HexNAc-(DeHex-)HexNAc+Hex	Hex-(Hex-)Hex-HexNAc-HexNAc+Hex
					2305	2302	794.393	794.059	3	2379.16	27.82	657.447	-	-	No	0	1	100.15	0	0	FALSE	-	2-3-0-0-0		Hex-(Hex-)Hex-HexNAc-HexNAc+Hex
					2307	2302	840.912	840.414	2	1678.81	27.83	525.481	-	-	No	0	1	115.11	0	0	FALSE	-	2-3-0-0-0		Hex-(Hex-)Hex-HexNAc-HexNAc+Hex
					2309	2302	1005.91	1005.91	2	2009.8	27.84	953.716	-	-	No	0	1	100.18	0	0	FALSE	-	2-3-0-0-0		Hex-(Hex-)Hex-HexNAc-HexNAc+Hex
					2311	2302	870.861	870.861	2	1739.71	27.85	844.769	-	-	No	0	1	104.2	0	0	FALSE	-	2-3-0-0-0		Hex-(Hex-)Hex-HexNAc-HexNAc+Hex
					2314	2313	677.808	677.808	2	1353.6	27.87	378.869	-	-	No	0	1	115.5	0	0	FALSE	-	2-3-0-0-0		Hex-(Hex-)Hex-HexNAc-HexNAc+Hex
					2316	2313	1110.83	1110.5	3	3328.48	27.89	387.43	-	-	No	0	1	15.64	420.82	0	FALSE	-	4-11-0-0-0		Hex-Hex-Hex-Hex-Hex-(Hex-HexNAc-)Hex-(Hex-Hex-(HexNAc-)Hex-)Hex-HexNAc-HexNAc+Hex	Hex-Hex-Hex-Hex-Hex-Hex-(Hex-HexNAc-)Hex-(HexNAc-(Hex-)Hex-)Hex-HexNAc-HexNAc+Hex	Hex-Hex-Hex-(Hex-HexNAc-)Hex-(Hex-Hex-Hex-Hex-(HexNAc-)Hex-)Hex-HexNAc-HexNAc+Hex	Hex-Hex-Hex-Hex-Hex-(Hex-HexNAc-)Hex-(Hex-HexNAc-(Hex-)Hex-)Hex-HexNAc-HexNAc+Hex	Hex-Hex-Hex-Hex-Hex-Hex-(Hex-HexNAc-)Hex-(Hex-HexNAc-Hex-)Hex-HexNAc-HexNAc+Hex	Hex-Hex-Hex-Hex-(Hex-HexNAc-)Hex-(Hex-HexNAc-(Hex-Hex-)Hex-)Hex-HexNAc-HexNAc+Hex	Hex-Hex-Hex-Hex-Hex-(HexNAc-)Hex-(Hex-Hex-(Hex-HexNAc-)Hex-)Hex-HexNAc-HexNAc+Hex	Hex-Hex-Hex-Hex-Hex-(HexNAc-)Hex-(Hex-Hex-Hex-(HexNAc-)Hex-)Hex-HexNAc-HexNAc+Hex	Hex-Hex-Hex-Hex-Hex-Hex-(HexNAc-)Hex-(Hex-Hex-(HexNAc-)Hex-)Hex-HexNAc-HexNAc+Hex	Hex-Hex-Hex-Hex-Hex-Hex-(HexNAc-)Hex-(HexNAc-(Hex-Hex-)Hex-)Hex-HexNAc-HexNAc+Hex	Hex-Hex-Hex-Hex-Hex-Hex-Hex-(HexNAc-)Hex-(HexNAc-(Hex-)Hex-)Hex-HexNAc-HexNAc+Hex	Hex-Hex-Hex-Hex-Hex-Hex-Hex-Hex-(HexNAc-)Hex-(HexNAc-Hex-)Hex-HexNAc-HexNAc+Hex	Hex-Hex-Hex-Hex-Hex-Hex-(HexNAc-)Hex-(Hex-HexNAc-(Hex-)Hex-)Hex-HexNAc-HexNAc+Hex	Hex-Hex-Hex-Hex-(HexNAc-)Hex-(Hex-HexNAc-(Hex-Hex-Hex-)Hex-)Hex-HexNAc-HexNAc+Hex	Hex-Hex-Hex-Hex-Hex-Hex-Hex-(HexNAc-)Hex-(Hex-HexNAc-Hex-)Hex-HexNAc-HexNAc+Hex	Hex-Hex-Hex-(Hex-HexNAc-)Hex-(Hex-Hex-Hex-(Hex-HexNAc-)Hex-)Hex-HexNAc-HexNAc+Hex	Hex-Hex-Hex-Hex-(Hex-HexNAc-)Hex-(Hex-Hex-Hex-(HexNAc-)Hex-)Hex-HexNAc-HexNAc+Hex	Hex-Hex-Hex-Hex-(Hex-HexNAc-)Hex-(Hex-Hex-(Hex-HexNAc-)Hex-)Hex-HexNAc-HexNAc+Hex	Hex-Hex-Hex-Hex-Hex-(Hex-HexNAc-)Hex-(HexNAc-(Hex-Hex-)Hex-)Hex-HexNAc-HexNAc+Hex	Hex-Hex-Hex-Hex-Hex-(HexNAc-)Hex-(Hex-HexNAc-(Hex-Hex-)Hex-)Hex-HexNAc-HexNAc+Hex	Hex-Hex-Hex-Hex-(HexNAc-)Hex-(Hex-Hex-Hex-Hex-(HexNAc-)Hex-)Hex-HexNAc-HexNAc+Hex	Hex-Hex-Hex-Hex-Hex-(Hex-)Hex-(Hex-HexNAc-(Hex-HexNAc-)Hex-)Hex-HexNAc-HexNAc+Hex	Hex-Hex-Hex-Hex-(HexNAc-)Hex-(Hex-Hex-Hex-(Hex-HexNAc-)Hex-)Hex-HexNAc-HexNAc+Hex	Hex-Hex-Hex-Hex-Hex-Hex-Hex-Hex-(HexNAc-(Hex-HexNAc-)Hex-)Hex-HexNAc-HexNAc+Hex	Hex-Hex-Hex-Hex-Hex-Hex-Hex-Hex-Hex-(HexNAc-(HexNAc-)Hex-)Hex-HexNAc-HexNAc+Hex
					2318	2313	1187.17	1186.5	3	3556.47	27.9	1151.43	-	-	No	0	1	114.77	0	0	FALSE	-	2-3-1-0-0		Hex-(Hex-)Hex-HexNAc-(DeHex-)HexNAc+Hex
					2320	2313	995.046	994.372	3	2980.09	27.91	786.716	-	-	No	0	1	104.09	0	0	FALSE	-	2-3-0-0-0		Hex-(Hex-)Hex-HexNAc-HexNAc+Hex
					2325	2324	736.682	735.673	3	2204	27.95	576.322	-	-	No	0	1	163.79	4.67	0	FALSE	-	3-3-1-0-0		DeHex-HexNAc-Hex-(Hex-)Hex-HexNAc-HexNAc+Hex
					2327	2324	756.388	756.051	3	2265.13	27.96	599.618	-	-	No	0	1	100.78	0	0	FALSE	-	2-3-0-0-0		Hex-(Hex-)Hex-HexNAc-HexNAc+Hex
					2329	2324	1031.42	1030.92	2	2059.82	27.97	612.636	-	-	No	0	1	102.51	0	0	FALSE	-	2-3-0-0-0		Hex-(Hex-)Hex-HexNAc-HexNAc+Hex
					2331	2324	884.385	884.385	2	1766.76	27.98	466.579	-	-	No	0	1	103.93	0	0	FALSE	-	2-3-0-0-0		Hex-(Hex-)Hex-HexNAc-HexNAc+Hex
					2333	2324	878.43	877.925	2	1753.84	28	579.289	-	-	No	0	1	79.53	0	0	FALSE	-	2-3-0-0-0		Hex-(Hex-)Hex-HexNAc-HexNAc+Hex
					2336	2335	1056.82	1056.14	3	3165.41	28.02	408.451	-	-	No	0	1	1.5	423.74	-1	TRUE	-	3-12-0-0-0	0-1-0-0-0	Hex-Hex-Hex-Hex-Hex-Hex-Hex-(HexNAc-)Hex-(Hex-Hex-)Hex-HexNAc-HexNAc+HexNAc1	Hex-Hex-Hex-Hex-Hex-(Hex-HexNAc-)Hex-(Hex-(Hex-)Hex-)Hex-HexNAc-HexNAc+HexNAc1	Hex-Hex-Hex-Hex-(Hex-HexNAc-)Hex-(Hex-(Hex-Hex-)Hex-)Hex-HexNAc-HexNAc+HexNAc1	Hex-Hex-Hex-Hex-Hex-Hex-(HexNAc-)Hex-(Hex-(Hex-)Hex-)Hex-HexNAc-HexNAc+HexNAc1	Hex-Hex-Hex-Hex-Hex-(HexNAc-)Hex-(Hex-(Hex-Hex-)Hex-)Hex-HexNAc-HexNAc+HexNAc1	Hex-Hex-Hex-Hex-Hex-Hex-(Hex-HexNAc-)Hex-(Hex-Hex-)Hex-HexNAc-HexNAc+HexNAc1
					2340	2335	1117.04	1116.55	2	2231.09	28.05	884.891	-	-	No	0	1	101.42	0	0	FALSE	-	2-3-0-0-0		Hex-(Hex-)Hex-HexNAc-HexNAc+Hex
					2344	2335	1027.41	1027.41	3	3079.2	28.08	523.002	-	-	No	0	1	13.63	302.81	-1	TRUE	-	4-7-0-1-0	0-0-0-1-0	HexNAc-Hex-Hex-(HexNAc-)Hex-(Hex-(Hex-)Hex-)Hex-HexNAc-HexNAc+NeuAc1	Hex-HexNAc-Hex-Hex-(HexNAc-)Hex-(Hex-Hex-)Hex-HexNAc-HexNAc+NeuAc1	Hex-Hex-(Hex-HexNAc-)Hex-(Hex-HexNAc-Hex-)Hex-HexNAc-HexNAc+NeuAc1	Hex-Hex-(Hex-HexNAc-)Hex-(HexNAc-(Hex-)Hex-)Hex-HexNAc-HexNAc+NeuAc1	Hex-Hex-Hex-(HexNAc-)Hex-(HexNAc-(Hex-)Hex-)Hex-HexNAc-HexNAc+NeuAc1	Hex-Hex-Hex-(Hex-HexNAc-)Hex-(HexNAc-Hex-)Hex-HexNAc-HexNAc+NeuAc1	Hex-Hex-Hex-Hex-(HexNAc-)Hex-(HexNAc-Hex-)Hex-HexNAc-HexNAc+NeuAc1	HexNAc-Hex-HexNAc-(Hex-)Hex-(Hex-Hex-Hex-)Hex-HexNAc-HexNAc+NeuAc1	HexNAc-Hex-Hex-(HexNAc-)Hex-(Hex-Hex-Hex-)Hex-HexNAc-HexNAc+NeuAc1	HexNAc-Hex-HexNAc-(Hex-)Hex-(Hex-(Hex-)Hex-)Hex-HexNAc-HexNAc+NeuAc1	Hex-HexNAc-(Hex-Hex-)Hex-(Hex-HexNAc-Hex-)Hex-HexNAc-HexNAc+NeuAc1	Hex-HexNAc-(Hex-Hex-)Hex-(HexNAc-(Hex-)Hex-)Hex-HexNAc-HexNAc+NeuAc1	Hex-HexNAc-(Hex-Hex-Hex-)Hex-(HexNAc-Hex-)Hex-HexNAc-HexNAc+NeuAc1	HexNAc-Hex-Hex-(Hex-HexNAc-)Hex-(Hex-Hex-)Hex-HexNAc-HexNAc+NeuAc1	Hex-HexNAc-Hex-Hex-(Hex-HexNAc-)Hex-(Hex-)Hex-HexNAc-HexNAc+NeuAc1	HexNAc-Hex-HexNAc-(Hex-Hex-)Hex-(Hex-Hex-)Hex-HexNAc-HexNAc+NeuAc1	HexNAc-Hex-HexNAc-(Hex-Hex-Hex-)Hex-(Hex-)Hex-HexNAc-HexNAc+NeuAc1	Hex-HexNAc-Hex-HexNAc-(Hex-Hex-)Hex-(Hex-)Hex-HexNAc-HexNAc+NeuAc1	Hex-HexNAc-Hex-HexNAc-(Hex-)Hex-(Hex-Hex-)Hex-HexNAc-HexNAc+NeuAc1	HexNAc-Hex-Hex-(Hex-)Hex-(HexNAc-(Hex-)Hex-)Hex-HexNAc-HexNAc+NeuAc1	Hex-Hex-Hex-(HexNAc-)Hex-(Hex-HexNAc-Hex-)Hex-HexNAc-HexNAc+NeuAc1	HexNAc-Hex-Hex-Hex-(Hex-HexNAc-(Hex-)Hex-)Hex-HexNAc-HexNAc+NeuAc1	Hex-HexNAc-Hex-Hex-Hex-(HexNAc-(Hex-)Hex-)Hex-HexNAc-HexNAc+NeuAc1	HexNAc-Hex-Hex-(Hex-Hex-)Hex-(HexNAc-Hex-)Hex-HexNAc-HexNAc+NeuAc1	Hex-HexNAc-Hex-Hex-Hex-(Hex-HexNAc-Hex-)Hex-HexNAc-HexNAc+NeuAc1
					2347	2346	660.322	659.989	3	1976.95	28.1	648.469	-	-	No	0	1	102.51	0	0	FALSE	-	2-3-0-0-0		Hex-(Hex-)Hex-HexNAc-HexNAc+Hex
					2349	2346	752.324	752.324	2	1502.63	28.11	719.456	-	-	No	0	1	124.38	0	0	FALSE	-	2-3-0-0-0		Hex-(Hex-)Hex-HexNAc-HexNAc+Hex	Hex-(Hex-)Hex-HexNAc-(DeHex-)HexNAc+Hex
					2351	2346	846.368	846.368	2	1690.72	28.12	565.31	-	-	No	0	1	173.57	0	0	FALSE	-	2-3-0-0-0		Hex-(Hex-)Hex-HexNAc-HexNAc+Hex
					2353	2346	707.659	707.659	3	2119.96	28.13	674.839	-	-	No	0	1	108.58	0	0	FALSE	-	2-3-0-0-0		Hex-(Hex-)Hex-HexNAc-HexNAc+Hex
					2355	2346	782.681	782.343	3	2344.01	28.14	703.704	-	-	No	0	1	115.64	0	0	FALSE	-	2-3-1-0-0		Hex-(Hex-)Hex-HexNAc-(DeHex-)HexNAc+Hex	Hex-(Hex-)Hex-HexNAc-HexNAc+Hex
					2358	2357	799.393	799.393	3	2395.16	28.16	764.789	-	-	No	0	1	100.33	0	0	FALSE	-	2-3-0-0-0		Hex-(Hex-)Hex-HexNAc-HexNAc+Hex
					2360	2357	1286.88	1286.55	3	3856.61	28.18	797.371	-	-	No	0	0.87	16.03	216.17	-1	TRUE	-	6-5-3-0-0	1-0-0-0-0	Hex-(DeHex-)HexNAc-Hex-HexNAc-Hex-(DeHex-HexNAc-Hex-)Hex-HexNAc-(DeHex-)HexNAc+Hex1	DeHex-HexNAc-Hex-(DeHex-)HexNAc-Hex-HexNAc-Hex-(Hex-)Hex-HexNAc-(DeHex-)HexNAc+Hex1	Hex-(DeHex-)HexNAc-Hex-HexNAc-(DeHex-HexNAc-)Hex-(Hex-)Hex-HexNAc-(DeHex-)HexNAc+Hex1	Hex-Hex-(DeHex-HexNAc-)Hex-(HexNAc-(DeHex-HexNAc-)Hex-)Hex-HexNAc-(DeHex-)HexNAc+Hex1
					2364	2357	892.012	891.68	3	2672.02	28.21	700.305	-	-	No	0	1	101.97	0	0	FALSE	-	2-3-1-0-0		Hex-(Hex-)Hex-HexNAc-(DeHex-)HexNAc+Hex
					2366	2357	834.388	834.388	3	2500.14	28.22	599.618	-	-	No	0	1	114.24	0	-2	TRUE	-	2-3-0-0-2	0-0-0-0-2	Hex-(Hex-)Hex-HexNAc-HexNAc+NeuGc2
					2371	2368	698.316	697.98	3	2090.92	28.26	663.395	-	-	No	0	1	100.28	0	0	FALSE	-	2-3-0-0-0		Hex-(Hex-)Hex-HexNAc-HexNAc+Hex
					2373	2368	805.376	805.042	3	2412.1	28.27	468.881	-	-	No	0	1	1.03	100	0	FALSE	-	2-4-0-0-0		Hex-(Hex-Hex-)Hex-HexNAc-HexNAc+Hex	Hex-Hex-(Hex-)Hex-HexNAc-HexNAc+Hex
					2375	2368	825.376	825.131	4	3296.5	28.28	553.517	-	-	No	0	1	2.54	102.14	0	FALSE	-	2-5-0-0-0		Hex-Hex-Hex-(Hex-)Hex-HexNAc-HexNAc+Hex	Hex-Hex-(Hex-Hex-)Hex-HexNAc-HexNAc+Hex
					2377	2368	764.664	764.328	3	2289.96	28.29	573.497	-	-	No	0	1	162.21	0	0	FALSE	-	2-3-0-0-0		Hex-(Hex-)Hex-HexNAc-HexNAc+Hex	Hex-(Hex-)Hex-HexNAc-(DeHex-)HexNAc+Hex
					2380	2379	941.447	940.946	4	3759.75	28.31	520.781	-	-	No	0	1	0.3	100.41	0	FALSE	-	3-3-2-0-0		DeHex-HexNAc-Hex-(Hex-)Hex-HexNAc-(DeHex-)HexNAc+Hex
					2382	2379	700.325	699.989	3	2096.95	28.32	665.465	-	-	No	0	1	100.24	0	0	FALSE	-	2-3-0-0-0		Hex-(Hex-)Hex-HexNAc-HexNAc+Hex
					2384	2379	914.94	914.94	4	3655.73	28.33	593.543	-	-	No	0	1	20.58	181.22	0	FALSE	-	4-7-0-0-0		Hex-Hex-Hex-Hex-(HexNAc-Hex-HexNAc-Hex-)Hex-HexNAc-HexNAc+Hex	HexNAc-Hex-Hex-(Hex-)Hex-(HexNAc-(Hex-)Hex-)Hex-HexNAc-HexNAc+Hex	HexNAc-Hex-Hex-(Hex-)Hex-(Hex-HexNAc-Hex-)Hex-HexNAc-HexNAc+Hex	Hex-Hex-(Hex-)Hex-(HexNAc-Hex-HexNAc-Hex-)Hex-HexNAc-HexNAc+Hex	HexNAc-Hex-HexNAc-(Hex-)Hex-(Hex-(Hex-)Hex-)Hex-HexNAc-HexNAc+Hex	HexNAc-Hex-Hex-(HexNAc-)Hex-(Hex-(Hex-)Hex-)Hex-HexNAc-HexNAc+Hex	HexNAc-Hex-Hex-Hex-Hex-Hex-(HexNAc-Hex-)Hex-HexNAc-HexNAc+Hex	Hex-HexNAc-(Hex-)Hex-(HexNAc-Hex-Hex-Hex-)Hex-HexNAc-HexNAc+Hex	HexNAc-Hex-Hex-(HexNAc-)Hex-(Hex-Hex-Hex-)Hex-HexNAc-HexNAc+Hex	Hex-Hex-(HexNAc-)Hex-(HexNAc-Hex-Hex-Hex-)Hex-HexNAc-HexNAc+Hex	HexNAc-Hex-HexNAc-(Hex-Hex-)Hex-(Hex-Hex-)Hex-HexNAc-HexNAc+Hex	Hex-HexNAc-(HexNAc-Hex-Hex-)Hex-(Hex-Hex-)Hex-HexNAc-HexNAc+Hex	HexNAc-Hex-Hex-(Hex-HexNAc-)Hex-(Hex-Hex-)Hex-HexNAc-HexNAc+Hex	Hex-Hex-(HexNAc-Hex-HexNAc-)Hex-(Hex-Hex-)Hex-HexNAc-HexNAc+Hex	HexNAc-Hex-HexNAc-(Hex-)Hex-(Hex-Hex-Hex-)Hex-HexNAc-HexNAc+Hex	Hex-Hex-(HexNAc-Hex-Hex-)Hex-(HexNAc-Hex-)Hex-HexNAc-HexNAc+Hex	HexNAc-Hex-Hex-(Hex-Hex-)Hex-(HexNAc-Hex-)Hex-HexNAc-HexNAc+Hex
					2386	2379	975.915	975.408	4	3897.6	28.35	558.771	-	-	No	0	1	7.73	173.96	0	FALSE	-	4-6-3-0-0		DeHex-HexNAc-Hex-(DeHex-)HexNAc-Hex-(Hex-(Hex-)Hex-)Hex-HexNAc-(DeHex-)HexNAc+Hex	Hex-(DeHex-)HexNAc-Hex-(DeHex-HexNAc-Hex-Hex-Hex-)Hex-HexNAc-(DeHex-)HexNAc+Hex	DeHex-HexNAc-Hex-Hex-(Hex-)Hex-(DeHex-HexNAc-Hex-)Hex-HexNAc-(DeHex-)HexNAc+Hex	DeHex-HexNAc-(Hex-)Hex-(DeHex-HexNAc-Hex-Hex-Hex-)Hex-HexNAc-(DeHex-)HexNAc+Hex	DeHex-HexNAc-Hex-Hex-(DeHex-HexNAc-)Hex-(Hex-Hex-)Hex-HexNAc-(DeHex-)HexNAc+Hex	Hex-Hex-Hex-(DeHex-HexNAc-)Hex-(DeHex-HexNAc-Hex-)Hex-HexNAc-(DeHex-)HexNAc+Hex	DeHex-HexNAc-Hex-(DeHex-)HexNAc-Hex-(Hex-Hex-Hex-)Hex-HexNAc-(DeHex-)HexNAc+Hex	DeHex-HexNAc-Hex-(DeHex-)HexNAc-(Hex-Hex-)Hex-(Hex-)Hex-HexNAc-(DeHex-)HexNAc+Hex	Hex-(DeHex-)HexNAc-(DeHex-HexNAc-Hex-Hex-)Hex-(Hex-)Hex-HexNAc-(DeHex-)HexNAc+Hex	DeHex-HexNAc-Hex-(DeHex-)HexNAc-(Hex-)Hex-(Hex-Hex-)Hex-HexNAc-(DeHex-)HexNAc+Hex	Hex-(DeHex-)HexNAc-(Hex-Hex-)Hex-(DeHex-HexNAc-Hex-)Hex-HexNAc-(DeHex-)HexNAc+Hex
					2388	2379	1146.5	1145.99	2	2289.97	28.36	1128.59	-	-	No	0	1	106.23	0	0	FALSE	-	2-3-1-0-0		Hex-(Hex-)Hex-HexNAc-(DeHex-)HexNAc+Hex	Hex-(Hex-)Hex-HexNAc-HexNAc+Hex
					2391	2390	725.876	725.876	4	2899.48	28.38	671.554	-	-	No	0	1	215.8	0	0	FALSE	-	2-3-1-0-0		Hex-(Hex-)Hex-HexNAc-(DeHex-)HexNAc+Hex	Hex-(Hex-)Hex-HexNAc-HexNAc+Hex
					2393	2390	801.335	801.001	3	2399.98	28.4	768.826	-	-	No	0	1	77.12	0	0	FALSE	-	2-3-0-0-0		Hex-(Hex-)Hex-HexNAc-HexNAc+Hex
					2395	2390	838.371	838.371	2	1674.73	28.41	565.31	-	-	No	0	1	127.8	0	0	FALSE	-	2-3-0-0-0		Hex-(Hex-)Hex-HexNAc-HexNAc+Hex	Hex-(Hex-)Hex-HexNAc-(DeHex-)HexNAc+Hex
					2397	2390	688.327	687.99	3	2060.95	28.42	610.589	-	-	No	0	1	169.45	0	0	FALSE	-	2-3-1-0-0		Hex-(Hex-)Hex-HexNAc-(DeHex-)HexNAc+Hex
					2399	2390	1300.22	1299.88	3	3896.63	28.43	898.923	-	-	No	0	1	9.59	185.38	0	FALSE	-	4-4-3-0-0		Hex-(DeHex-HexNAc-)Hex-(DeHex-HexNAc-Hex-)Hex-HexNAc-(DeHex-)HexNAc+Hex
					2402	2401	650.296	650.296	3	1947.87	28.45	596.952	-	-	No	0	1	105.5	0	0	FALSE	-	2-3-0-0-0		Hex-(Hex-)Hex-HexNAc-HexNAc+Hex	Hex-(Hex-)Hex-HexNAc-(DeHex-)HexNAc+Hex
					2404	2401	749.859	749.363	4	2993.42	28.46	539.294	-	-	No	0	1	128.19	0	0	FALSE	-	2-3-1-0-0		Hex-(Hex-)Hex-HexNAc-(DeHex-)HexNAc+Hex	Hex-(Hex-)Hex-HexNAc-HexNAc+Hex
					2406	2401	672.648	672.648	3	2014.92	28.47	480.23	-	-	No	0	1	107.57	0	0	FALSE	-	2-3-1-0-0		Hex-(Hex-)Hex-HexNAc-(DeHex-)HexNAc+Hex
					2408	2401	703.338	703.004	3	2105.99	28.48	668.443	-	-	No	0	1	100.84	0	0	FALSE	-	2-3-1-0-0		Hex-(Hex-)Hex-HexNAc-(DeHex-)HexNAc+Hex	Hex-(Hex-)Hex-HexNAc-HexNAc+Hex
					2410	2401	852.396	851.895	2	1701.78	28.49	799.754	-	-	No	0	1	100.56	0	0	FALSE	-	2-3-0-0-0		Hex-(Hex-)Hex-HexNAc-HexNAc+Hex
					2413	2412	958.729	958.393	3	2872.16	28.51	683.509	-	-	No	0	1	94.22	31.79	0	FALSE	-	2-6-0-0-0		Hex-Hex-Hex-(Hex-Hex-)Hex-HexNAc-HexNAc+Hex	Hex-Hex-Hex-Hex-(Hex-)Hex-HexNAc-HexNAc+Hex	Hex-Hex-(Hex-Hex-Hex-)Hex-HexNAc-HexNAc+Hex
					2415	2412	692.066	691.814	4	2763.23	28.53	351.913	-	-	No	0	1	0.25	100.89	0	FALSE	-	4-4-0-0-0		HexNAc-(HexNAc-)Hex-(Hex-Hex-)Hex-HexNAc-HexNAc+Hex	HexNAc-Hex-(Hex-HexNAc-Hex-)Hex-HexNAc-HexNAc+Hex	HexNAc-Hex-(HexNAc-(Hex-)Hex-)Hex-HexNAc-HexNAc+Hex	Hex-HexNAc-(HexNAc-)Hex-(Hex-)Hex-HexNAc-HexNAc+Hex	HexNAc-(Hex-HexNAc-)Hex-(Hex-)Hex-HexNAc-HexNAc+Hex	HexNAc-(Hex-)Hex-(HexNAc-Hex-)Hex-HexNAc-HexNAc+Hex	Hex-HexNAc-Hex-(HexNAc-Hex-)Hex-HexNAc-HexNAc+Hex
					2421	2412	714.074	713.82	4	2851.25	28.56	360.425	-	-	No	0	1	25.51	101.6	0	FALSE	-	4-5-0-0-0		HexNAc-Hex-Hex-Hex-(HexNAc-Hex-)Hex-HexNAc-HexNAc+Hex
					2426	2423	775.396	774.395	2	1546.78	28.59	723.525	-	-	No	0	1	16.04	0	0	FALSE	-	2-3-0-0-0		Hex-(Hex-)Hex-HexNAc-HexNAc+Hex
					2428	2423	813.878	813.878	2	1625.74	28.61	532.799	-	-	No	0	1	182.25	0	0	FALSE	-	2-3-0-0-0		Hex-(Hex-)Hex-HexNAc-HexNAc+Hex
					2432	2423	1233.58	1233.24	3	3696.7	28.63	1193.52	-	-	No	0	1	115.68	0	0	FALSE	-	2-3-0-0-0		Hex-(Hex-)Hex-HexNAc-HexNAc+Hex
					2435	2434	956.403	955.901	2	1909.79	28.65	797.228	-	-	No	0	1	106.42	0	0	FALSE	-	2-3-0-0-0		Hex-(Hex-)Hex-HexNAc-HexNAc+Hex
					2437	2434	667.994	667.994	3	2000.96	28.67	464.582	-	-	No	0	1	111.08	0	0	FALSE	-	2-3-1-0-0		Hex-(Hex-)Hex-HexNAc-(DeHex-)HexNAc+Hex
					2439	2434	990.998	990.998	2	1979.98	28.68	938.23	-	-	No	0	1	102.07	0	0	FALSE	-	2-3-0-0-0		Hex-(Hex-)Hex-HexNAc-HexNAc+Hex
					2441	2434	905.431	905.431	2	1808.85	28.69	677.31	-	-	No	0	1	25.12	0	0	FALSE	-	2-3-0-0-0		Hex-(Hex-)Hex-HexNAc-HexNAc+Hex
					2443	2434	761.358	761.358	4	3041.4	28.7	617.571	-	-	No	0	1	102.37	0	0	FALSE	-	2-3-1-0-0		Hex-(Hex-)Hex-HexNAc-(DeHex-)HexNAc+Hex
					2446	2445	709.687	709.354	3	2125.04	28.72	492.921	-	-	No	0	1	100.97	0	0	FALSE	-	2-3-0-0-0		Hex-(Hex-)Hex-HexNAc-HexNAc+Hex	Hex-(Hex-)Hex-HexNAc-(DeHex-)HexNAc+Hex
					2448	2445	786.06	785.73	3	2354.17	28.74	709.303	-	-	No	0	1	113.18	0	0	FALSE	-	2-3-1-0-0		Hex-(Hex-)Hex-HexNAc-(DeHex-)HexNAc+Hex	Hex-(Hex-)Hex-HexNAc-HexNAc+Hex
					2450	2445	792.673	792.341	3	2374	28.75	500.969	-	-	No	0	1	15.41	112.9	0	FALSE	-	2-6-0-0-0		Hex-Hex-Hex-(Hex-Hex-)Hex-HexNAc-HexNAc+Hex	Hex-Hex-Hex-Hex-(Hex-)Hex-HexNAc-HexNAc+Hex	Hex-Hex-(Hex-Hex-Hex-)Hex-HexNAc-HexNAc+Hex
					2452	2445	925.434	924.944	4	3695.75	28.76	661.154	-	-	No	0	1	102.4	0	0	FALSE	-	2-3-0-0-0		Hex-(Hex-)Hex-HexNAc-HexNAc+Hex
					2454	2445	1182.02	1181.52	2	2361.02	28.77	1117.7	-	-	No	0	1	112.05	0	0	FALSE	-	2-3-0-0-0		Hex-(Hex-)Hex-HexNAc-HexNAc+Hex
					2457	2456	1136.04	1135.54	2	2269.07	28.8	864.626	-	-	No	0	1	103.06	0	0	FALSE	-	2-3-0-0-0		Hex-(Hex-)Hex-HexNAc-HexNAc+Hex
					2459	2456	694.827	694.327	4	2773.28	28.81	378.869	-	-	No	0	1	1.38	121.23	0	FALSE	-	3-5-0-0-0		HexNAc-(Hex-Hex-)Hex-(Hex-)Hex-HexNAc-HexNAc+Hex	Hex-HexNAc-(Hex-)Hex-(Hex-)Hex-HexNAc-HexNAc+Hex	HexNAc-(Hex-)Hex-(Hex-Hex-)Hex-HexNAc-HexNAc+Hex	Hex-HexNAc-Hex-(Hex-Hex-)Hex-HexNAc-HexNAc+Hex	HexNAc-Hex-(Hex-(Hex-)Hex-)Hex-HexNAc-HexNAc+Hex	HexNAc-Hex-(Hex-Hex-Hex-)Hex-HexNAc-HexNAc+Hex
					2461	2456	1123.48	1122.98	2	2243.95	28.82	599.618	-	-	No	0	1	73.29	75.78	0	FALSE	-	2-5-0-0-0		Hex-Hex-Hex-(Hex-)Hex-HexNAc-HexNAc+Hex	Hex-Hex-(Hex-Hex-)Hex-HexNAc-HexNAc+Hex
					2463	2456	1450.87	1450.52	3	4348.53	28.83	1486.15	-	-	No	0	1	124.71	0	0	FALSE	-	2-3-1-0-0		Hex-(Hex-)Hex-HexNAc-(DeHex-)HexNAc+Hex	Hex-(Hex-)Hex-HexNAc-HexNAc+Hex
					2465	2456	683.646	683.317	3	2046.93	28.84	649.009	-	-	No	0	1	106.86	0	0	FALSE	-	2-3-0-0-0		Hex-(Hex-)Hex-HexNAc-HexNAc+Hex
					2468	2467	653.969	653.969	3	1958.88	28.87	619.282	-	-	No	0	1	101.33	0	0	FALSE	-	2-3-1-0-0		Hex-(Hex-)Hex-HexNAc-(DeHex-)HexNAc+Hex	Hex-(Hex-)Hex-HexNAc-HexNAc+Hex
					2470	2467	777.335	776.835	2	1551.66	28.88	443.364	-	-	No	0	1	56.09	0	0	FALSE	-	2-3-0-0-0		Hex-(Hex-)Hex-HexNAc-HexNAc+Hex
					2472	2467	933.359	933.032	3	2796.07	28.89	895.214	-	-	No	0	1	102.21	0	0	FALSE	-	2-3-0-0-0		Hex-(Hex-)Hex-HexNAc-HexNAc+Hex
					2474	2467	1507.13	1506.63	2	3011.24	28.9	1753.91	-	-	No	0	1	102.78	0	0	FALSE	-	2-3-0-0-0		Hex-(Hex-)Hex-HexNAc-HexNAc+Hex
					2476	2467	844.403	843.403	3	2527.19	28.91	730.675	-	-	No	0	1	171.26	0	0	FALSE	-	2-3-0-0-0		Hex-(Hex-)Hex-HexNAc-HexNAc+Hex	Hex-(Hex-)Hex-HexNAc-(DeHex-)HexNAc+Hex
					2479	2478	718.658	718.323	3	2151.95	28.94	683.577	-	-	No	0	1	103.38	0	0	FALSE	-	2-3-0-0-0		Hex-(Hex-)Hex-HexNAc-HexNAc+Hex	Hex-(Hex-)Hex-HexNAc-(DeHex-)HexNAc+Hex
					2481	2478	1143.52	1143.52	2	2285.03	28.95	807.297	-	-	No	0	1	233.54	0	0	FALSE	-	2-3-1-0-0		Hex-(Hex-)Hex-HexNAc-(DeHex-)HexNAc+Hex	Hex-(Hex-)Hex-HexNAc-HexNAc+Hex
					2483	2478	791.396	790.896	2	1579.78	28.96	699.354	-	-	No	0	1	122.32	0	0	FALSE	-	2-3-0-0-0		Hex-(Hex-)Hex-HexNAc-HexNAc+Hex
					2485	2478	912.406	912.406	2	1822.8	28.98	1111.03	-	-	No	0	1	102.07	0	0	FALSE	-	2-3-1-0-0		Hex-(Hex-)Hex-HexNAc-(DeHex-)HexNAc+Hex	Hex-(Hex-)Hex-HexNAc-HexNAc+Hex
					2487	2478	1161.55	1160.88	3	3479.61	28.99	684.815	-	-	No	0	1	79.44	133.42	0	FALSE	-	3-5-1-0-0		HexNAc-Hex-(Hex-(Hex-)Hex-)Hex-HexNAc-(DeHex-)HexNAc+Hex	HexNAc-Hex-(Hex-Hex-Hex-)Hex-HexNAc-(DeHex-)HexNAc+Hex	Hex-HexNAc-Hex-(Hex-Hex-)Hex-HexNAc-(DeHex-)HexNAc+Hex	HexNAc-(Hex-)Hex-(Hex-Hex-)Hex-HexNAc-(DeHex-)HexNAc+Hex	HexNAc-(Hex-Hex-)Hex-(Hex-)Hex-HexNAc-(DeHex-)HexNAc+Hex	Hex-HexNAc-(Hex-)Hex-(Hex-)Hex-HexNAc-(DeHex-)HexNAc+Hex
					2490	2489	674.3	674.3	3	2019.88	29.01	638.74	-	-	No	0	1	150.6	0	0	FALSE	-	2-3-1-0-0		Hex-(Hex-)Hex-HexNAc-(DeHex-)HexNAc+Hex
					2492	2489	925.083	924.754	3	2771.24	29.03	661.308	-	-	No	0	1	100.59	0	0	FALSE	-	2-3-1-0-0		Hex-(Hex-)Hex-HexNAc-(DeHex-)HexNAc+Hex
					2494	2489	1073.52	1073.52	2	2145.03	29.04	720.485	-	-	No	0	1	106.74	0	0	FALSE	-	2-3-0-0-0		Hex-(Hex-)Hex-HexNAc-HexNAc+Hex
					2496	2489	928.879	928.372	2	1854.73	29.06	1239.65	-	-	No	0	1	94.16	0	0	FALSE	-	2-3-0-0-0		Hex-(Hex-)Hex-HexNAc-HexNAc+Hex
					2498	2489	1180.02	1179.52	2	2357.02	29.07	592.027	-	-	No	0	1	368.79	107.01	-1	TRUE	-	2-6-0-0-0	0-1-0-0-0	Hex-Hex-Hex-(Hex-)Hex-HexNAc-HexNAc+HexNAc1	Hex-Hex-(Hex-Hex-)Hex-HexNAc-HexNAc+HexNAc1
					2501	2500	716.347	715.352	3	2143.03	29.09	516.476	-	-	No	0	1	101.8	0	0	FALSE	-	2-3-1-0-0		Hex-(Hex-)Hex-HexNAc-(DeHex-)HexNAc+Hex	Hex-(Hex-)Hex-HexNAc-HexNAc+Hex
					2503	2500	656.292	655.959	3	1964.85	29.11	573.562	-	-	No	0	1	90.37	0	0	FALSE	-	2-3-1-0-0		Hex-(Hex-)Hex-HexNAc-(DeHex-)HexNAc+Hex
					2507	2500	721.333	721.001	3	2159.98	29.13	693.122	-	-	No	0	1	136.84	0	0	FALSE	-	2-3-1-0-0		Hex-(Hex-)Hex-HexNAc-(DeHex-)HexNAc+Hex	Hex-(Hex-)Hex-HexNAc-HexNAc+Hex
					2509	2500	895.342	894.676	3	2681.01	29.14	841.855	-	-	No	0	1	105.86	0	0	FALSE	-	2-3-0-0-0		Hex-(Hex-)Hex-HexNAc-HexNAc+Hex	Hex-(Hex-)Hex-HexNAc-(DeHex-)HexNAc+Hex
					2512	2511	732.71	732.375	3	2194.1	29.16	837.872	-	-	No	0	1	123.3	0	0	FALSE	-	2-3-1-0-0		Hex-(Hex-)Hex-HexNAc-(DeHex-)HexNAc+Hex
					2514	2511	983.438	983.438	2	1964.86	29.17	673.317	-	-	No	0	1	140.84	0	0	FALSE	-	2-3-0-0-0		Hex-(Hex-)Hex-HexNAc-HexNAc+Hex
					2516	2511	816.417	816.076	3	2445.21	29.19	500.969	-	-	No	0	1	128.78	0	0	FALSE	-	2-3-0-0-0		Hex-(Hex-)Hex-HexNAc-HexNAc+Hex
					2520	2511	833.419	833.086	3	2496.24	29.21	798.385	-	-	No	0	1	102.37	0	0	FALSE	-	2-3-0-0-0		Hex-(Hex-)Hex-HexNAc-HexNAc+Hex
					2523	2522	671.307	670.973	3	2009.9	29.23	534.308	-	-	No	0	1	101.08	0.05	0	FALSE	-	3-3-0-0-0		Hex-(HexNAc-Hex-)Hex-HexNAc-HexNAc+Hex	HexNAc-Hex-(Hex-)Hex-HexNAc-HexNAc+Hex
					2527	2522	902.071	901.401	3	2701.18	29.26	866.786	-	-	No	0	1	100.92	0	0	FALSE	-	2-3-1-0-0		Hex-(Hex-)Hex-HexNAc-(DeHex-)HexNAc+Hex	Hex-(Hex-)Hex-HexNAc-HexNAc+Hex
					2529	2522	1052.93	1052.42	2	2102.82	29.27	896.378	-	-	No	0	1	99.96	0	0	FALSE	-	2-3-0-0-0		Hex-(Hex-)Hex-HexNAc-HexNAc+Hex
					2531	2522	1315.55	1315.31	4	5257.2	29.29	909.434	-	-	No	0	1	8.1	178.92	0	FALSE	-	4-5-3-0-1		NeuGc-Hex-(DeHex-)HexNAc-(Hex-(DeHex-)HexNAc-)Hex-(Hex-)Hex-HexNAc-(DeHex-)HexNAc+Hex	NeuGc-Hex-(DeHex-)HexNAc-(DeHex-HexNAc-)Hex-(Hex-Hex-)Hex-HexNAc-(DeHex-)HexNAc+Hex	NeuGc-Hex-(DeHex-)HexNAc-(Hex-)Hex-(DeHex-HexNAc-Hex-)Hex-HexNAc-(DeHex-)HexNAc+Hex	NeuGc-Hex-(DeHex-)HexNAc-Hex-(Hex-(DeHex-)HexNAc-Hex-)Hex-HexNAc-(DeHex-)HexNAc+Hex	NeuGc-Hex-(DeHex-)HexNAc-Hex-(DeHex-HexNAc-(Hex-)Hex-)Hex-HexNAc-(DeHex-)HexNAc+Hex
					2534	2533	848.39	848.054	3	2541.14	29.31	516.237	-	-	No	0	1	0.53	100	0	FALSE	-	3-3-0-0-0		Hex-(HexNAc-Hex-)Hex-HexNAc-HexNAc+Hex	HexNAc-Hex-(Hex-)Hex-HexNAc-HexNAc+Hex
					2536	2533	811.023	810.689	3	2429.05	29.32	708.625	-	-	No	0	1	100.74	0	0	FALSE	-	2-3-0-0-0		Hex-(Hex-)Hex-HexNAc-HexNAc+Hex
					2538	2533	1068.45	1068.12	3	3201.33	29.33	532.799	-	-	No	0	1	112.56	17.87	0	FALSE	-	3-3-0-0-0		HexNAc-Hex-(Hex-)Hex-HexNAc-HexNAc+Hex	Hex-(HexNAc-Hex-)Hex-HexNAc-HexNAc+Hex
					2540	2533	947.427	947.427	2	1892.84	29.34	929.816	-	-	No	0	1	116.64	0	0	FALSE	-	2-3-0-0-0		Hex-(Hex-)Hex-HexNAc-HexNAc+Hex	Hex-(Hex-)Hex-HexNAc-(DeHex-)HexNAc+Hex
					2542	2533	1173.51	1173.51	2	2345	29.36	466.579	-	-	No	0	1	108.48	0	0	FALSE	-	2-3-0-0-0		Hex-(Hex-)Hex-HexNAc-HexNAc+Hex	Hex-(Hex-)Hex-HexNAc-(DeHex-)HexNAc+Hex
					2545	2544	676.555	676.304	4	2701.19	29.38	650.483	-	-	No	0	1	101.43	0	0	FALSE	-	2-3-0-0-0		Hex-(Hex-)Hex-HexNAc-HexNAc+Hex	Hex-(Hex-)Hex-HexNAc-(DeHex-)HexNAc+Hex
					2547	2544	722.998	722.664	3	2164.97	29.39	348.688	-	-	No	0	1	2.2	109.45	0	FALSE	-	2-5-0-0-0		Hex-Hex-(Hex-Hex-)Hex-HexNAc-HexNAc+Hex	Hex-Hex-Hex-(Hex-)Hex-HexNAc-HexNAc+Hex
					2549	2544	997.174	996.841	3	2987.5	29.4	923.523	-	-	No	0	1	108.51	0	-2	TRUE	-	2-3-1-0-1	0-0-1-0-1	Hex-(Hex-)Hex-HexNAc-HexNAc+DeHex1NeuGc1
					2551	2544	743.002	742.669	3	2224.98	29.42	531.72	-	-	No	0	1	113.34	0	0	FALSE	-	2-3-1-0-0		Hex-(Hex-)Hex-HexNAc-(DeHex-)HexNAc+Hex
					2553	2544	747.356	747.356	2	1492.7	29.43	730.231	-	-	No	0	1	148.32	0	0	FALSE	-	2-3-0-0-0		Hex-(Hex-)Hex-HexNAc-HexNAc+Hex
					2556	2555	986.463	986.126	3	2955.36	29.45	883.715	-	-	No	0	1	112.38	0	0	FALSE	-	2-3-1-0-0		Hex-(Hex-)Hex-HexNAc-(DeHex-)HexNAc+Hex
					2558	2555	993.959	993.458	2	1984.9	29.46	669.383	-	-	No	0	1	103.2	0	0	FALSE	-	2-3-0-0-0		Hex-(Hex-)Hex-HexNAc-HexNAc+Hex
					2560	2555	729.988	729.988	3	2186.94	29.48	694.454	-	-	No	0	1	112.11	0	0	FALSE	-	2-3-1-0-0		Hex-(Hex-)Hex-HexNAc-(DeHex-)HexNAc+Hex
					2562	2555	1105.11	1104.78	3	3311.32	29.49	531.72	-	-	No	0	1	9.7	127.04	0	FALSE	-	3-4-2-0-0		DeHex-HexNAc-(Hex-)Hex-(Hex-)Hex-HexNAc-(DeHex-)HexNAc+Hex	DeHex-HexNAc-Hex-(Hex-Hex-)Hex-HexNAc-(DeHex-)HexNAc+Hex
					2564	2555	1243.03	1242.28	4	4965.07	29.5	1134.59	-	-	No	0	1	9.42	199.2	0	FALSE	-	3-4-1-0-1		NeuGc-Hex-(DeHex-)HexNAc-Hex-(Hex-)Hex-HexNAc-HexNAc+Hex
					2567	2566	878.104	877.768	3	2630.28	29.52	979.946	-	-	No	0	1	101.33	0	0	FALSE	-	2-3-0-0-0		Hex-(Hex-)Hex-HexNAc-HexNAc+Hex	Hex-(Hex-)Hex-HexNAc-(DeHex-)HexNAc+Hex
					2569	2566	663.317	663.317	2	1324.62	29.53	611.139	-	-	No	0	1	114.14	0	0	FALSE	-	2-3-0-0-0		Hex-(Hex-)Hex-HexNAc-HexNAc+Hex
					2571	2566	745.354	745.354	2	1488.69	29.54	719.602	-	-	No	0	1	129.38	0	0	FALSE	-	2-3-1-0-0		Hex-(Hex-)Hex-HexNAc-(DeHex-)HexNAc+Hex
					2573	2566	874.732	874.732	3	2621.17	29.55	1182.37	-	-	No	0	1	101.31	0	0	FALSE	-	2-3-0-0-0		Hex-(Hex-)Hex-HexNAc-HexNAc+Hex
					2575	2566	1022.92	1022.92	2	2043.83	29.57	605.293	-	-	No	0	1	116.26	0	0	FALSE	-	2-3-0-0-0		Hex-(Hex-)Hex-HexNAc-HexNAc+Hex
					2578	2577	685.942	685.607	3	2053.8	29.59	674.011	-	-	No	0	1	116.75	0	0	FALSE	-	2-3-0-0-0		Hex-(Hex-)Hex-HexNAc-HexNAc+Hex
					2580	2577	1202.26	1201.51	4	4802.01	29.6	1134.59	-	-	No	0	1	22.39	247.89	0	FALSE	-	3-4-1-0-0		Hex-(DeHex-)HexNAc-Hex-(Hex-)Hex-HexNAc-HexNAc+Hex
					2582	2577	1022.92	1022.92	2	2043.83	29.61	605.266	-	-	No	0	1	117.34	0	0	FALSE	-	2-3-0-0-0		Hex-(Hex-)Hex-HexNAc-HexNAc+Hex	Hex-(Hex-)Hex-HexNAc-(DeHex-)HexNAc+Hex
					2586	2577	820.383	819.881	2	1637.75	29.63	845.61	-	-	No	0	1	118.98	0	0	FALSE	-	2-3-0-0-0		Hex-(Hex-)Hex-HexNAc-HexNAc+Hex
					2589	2588	954.909	954.405	2	1906.8	29.65	1032.49	-	-	No	0	1	128.25	0	0	FALSE	-	2-3-0-0-0		Hex-(Hex-)Hex-HexNAc-HexNAc+Hex
					2593	2588	830.756	830.423	3	2488.25	29.68	593.543	-	-	No	0	1	139.99	0	0	FALSE	-	2-3-1-0-0		Hex-(Hex-)Hex-HexNAc-(DeHex-)HexNAc+Hex
					2595	2588	794.365	794.112	4	3172.42	29.69	539.294	-	-	No	0	1	104.89	4.55	0	FALSE	-	4-3-2-0-0		DeHex-HexNAc-Hex-(DeHex-HexNAc-Hex-)Hex-HexNAc-HexNAc+Hex	DeHex-HexNAc-(DeHex-HexNAc-)Hex-(Hex-)Hex-HexNAc-HexNAc+Hex
					2597	2588	977.436	977.436	2	1952.86	29.7	925.269	-	-	No	0	1	101.43	0	0	FALSE	-	2-3-0-0-0		Hex-(Hex-)Hex-HexNAc-HexNAc+Hex
					2600	2599	681.302	680.967	3	2039.88	29.73	579.289	-	-	No	0	1	100.55	0	0	FALSE	-	2-3-1-0-0		Hex-(Hex-)Hex-HexNAc-(DeHex-)HexNAc+Hex	Hex-(Hex-)Hex-HexNAc-HexNAc+Hex
					2602	2599	738.32	737.986	3	2210.94	29.74	492.921	-	-	No	0	1	109.89	0	0	FALSE	-	2-3-1-0-0		Hex-(Hex-)Hex-HexNAc-(DeHex-)HexNAc+Hex	Hex-(Hex-)Hex-HexNAc-HexNAc+Hex
					2604	2599	1043.46	1042.96	4	4167.81	29.75	481.482	-	-	No	0	1	101.2	42.64	0	FALSE	-	3-3-1-0-0		Hex-(HexNAc-Hex-)Hex-HexNAc-(DeHex-)HexNAc+Hex	HexNAc-Hex-(Hex-)Hex-HexNAc-(DeHex-)HexNAc+Hex
					2606	2599	1133.11	1132.78	3	3395.32	29.76	766.699	-	-	No	0	1	108.17	12.67	0	FALSE	-	3-5-0-0-0		HexNAc-Hex-(Hex-(Hex-)Hex-)Hex-HexNAc-HexNAc+Hex	HexNAc-Hex-(Hex-Hex-Hex-)Hex-HexNAc-HexNAc+Hex	Hex-HexNAc-Hex-(Hex-Hex-)Hex-HexNAc-HexNAc+Hex	HexNAc-(Hex-Hex-)Hex-(Hex-)Hex-HexNAc-HexNAc+Hex	Hex-HexNAc-(Hex-)Hex-(Hex-)Hex-HexNAc-HexNAc+Hex	HexNAc-(Hex-)Hex-(Hex-Hex-)Hex-HexNAc-HexNAc+Hex
					2608	2599	773.334	773.334	3	2316.98	29.78	387.43	-	-	No	0	1	1.28	101.41	0	FALSE	-	3-4-0-0-0		HexNAc-(Hex-)Hex-(Hex-)Hex-HexNAc-HexNAc+Hex	Hex-HexNAc-Hex-(Hex-)Hex-HexNAc-HexNAc+Hex	HexNAc-Hex-(Hex-Hex-)Hex-HexNAc-HexNAc+Hex
					2615	2610	805.668	805.668	3	2413.98	29.82	771.077	-	-	No	0	1	101.23	0	0	FALSE	-	2-3-0-0-0		Hex-(Hex-)Hex-HexNAc-HexNAc+Hex
					2617	2610	1206.02	1205.51	4	4818.01	29.83	964.48	-	-	No	0	1	4.36	152.33	0	FALSE	-	4-6-1-0-0		DeHex-HexNAc-Hex-HexNAc-Hex-(Hex-Hex-Hex-)Hex-HexNAc-HexNAc+Hex	DeHex-HexNAc-(Hex-Hex-)Hex-(Hex-(HexNAc-)Hex-)Hex-HexNAc-HexNAc+Hex	DeHex-HexNAc-(Hex-)Hex-(Hex-Hex-(HexNAc-)Hex-)Hex-HexNAc-HexNAc+Hex	DeHex-HexNAc-(Hex-)Hex-(Hex-(Hex-HexNAc-)Hex-)Hex-HexNAc-HexNAc+Hex	Hex-(DeHex-)HexNAc-(Hex-)Hex-(Hex-(HexNAc-)Hex-)Hex-HexNAc-HexNAc+Hex	Hex-(DeHex-)HexNAc-Hex-(Hex-Hex-(HexNAc-)Hex-)Hex-HexNAc-HexNAc+Hex	Hex-(DeHex-)HexNAc-Hex-(Hex-(Hex-HexNAc-)Hex-)Hex-HexNAc-HexNAc+Hex	HexNAc-Hex-(DeHex-)HexNAc-(Hex-)Hex-(Hex-Hex-)Hex-HexNAc-HexNAc+Hex	Hex-HexNAc-(DeHex-HexNAc-)Hex-(Hex-(Hex-)Hex-)Hex-HexNAc-HexNAc+Hex	Hex-HexNAc-Hex-(DeHex-)HexNAc-(Hex-)Hex-(Hex-)Hex-HexNAc-HexNAc+Hex	Hex-HexNAc-(DeHex-HexNAc-)Hex-(Hex-Hex-Hex-)Hex-HexNAc-HexNAc+Hex	Hex-(DeHex-)HexNAc-(Hex-Hex-)Hex-(HexNAc-Hex-)Hex-HexNAc-HexNAc+Hex	Hex-(DeHex-)HexNAc-(Hex-)Hex-(HexNAc-(Hex-)Hex-)Hex-HexNAc-HexNAc+Hex	Hex-(DeHex-)HexNAc-(Hex-)Hex-(Hex-HexNAc-Hex-)Hex-HexNAc-HexNAc+Hex	Hex-HexNAc-(Hex-Hex-)Hex-(DeHex-HexNAc-Hex-)Hex-HexNAc-HexNAc+Hex	DeHex-HexNAc-(HexNAc-)Hex-(Hex-Hex-Hex-Hex-)Hex-HexNAc-HexNAc+Hex	Hex-HexNAc-(Hex-)Hex-(DeHex-HexNAc-(Hex-)Hex-)Hex-HexNAc-HexNAc+Hex	Hex-Hex-(DeHex-HexNAc-)Hex-(HexNAc-(Hex-)Hex-)Hex-HexNAc-HexNAc+Hex	Hex-Hex-(DeHex-HexNAc-)Hex-(Hex-HexNAc-Hex-)Hex-HexNAc-HexNAc+Hex	Hex-Hex-Hex-(HexNAc-)Hex-(DeHex-HexNAc-Hex-)Hex-HexNAc-HexNAc+Hex	Hex-Hex-(HexNAc-)Hex-(DeHex-HexNAc-(Hex-)Hex-)Hex-HexNAc-HexNAc+Hex	DeHex-HexNAc-(Hex-Hex-)Hex-(HexNAc-(Hex-)Hex-)Hex-HexNAc-HexNAc+Hex	DeHex-HexNAc-(Hex-)Hex-(Hex-HexNAc-(Hex-)Hex-)Hex-HexNAc-HexNAc+Hex	DeHex-HexNAc-(Hex-)Hex-(HexNAc-(Hex-Hex-)Hex-)Hex-HexNAc-HexNAc+Hex	DeHex-HexNAc-(Hex-Hex-)Hex-(Hex-HexNAc-Hex-)Hex-HexNAc-HexNAc+Hex
					2619	2610	1602.35	1602.02	3	4803.04	29.84	1108.53	-	-	No	0	1	18.84	359.52	0	FALSE	-	4-6-1-0-0		Hex-(DeHex-)HexNAc-(HexNAc-)Hex-(Hex-Hex-Hex-)Hex-HexNAc-HexNAc+Hex	Hex-(DeHex-)HexNAc-(HexNAc-)Hex-(Hex-(Hex-)Hex-)Hex-HexNAc-HexNAc+Hex	Hex-(DeHex-)HexNAc-(Hex-HexNAc-)Hex-(Hex-Hex-)Hex-HexNAc-HexNAc+Hex	Hex-(DeHex-)HexNAc-Hex-(HexNAc-(Hex-Hex-)Hex-)Hex-HexNAc-HexNAc+Hex	Hex-(DeHex-)HexNAc-Hex-(Hex-HexNAc-(Hex-)Hex-)Hex-HexNAc-HexNAc+Hex
					2622	2621	916.104	915.773	3	2744.3	29.86	1063.61	-	-	No	0	1	107.58	0	0	FALSE	-	2-3-1-0-0		Hex-(Hex-)Hex-HexNAc-(DeHex-)HexNAc+Hex
					2624	2621	1165.5	1165.5	4	4657.98	29.88	847.638	-	-	No	0	1	10.66	247.97	0	FALSE	-	5-5-0-1-0		NeuAc-Hex-HexNAc-Hex-(HexNAc-(Hex-HexNAc-)Hex-)Hex-HexNAc-HexNAc+Hex	NeuAc-Hex-HexNAc-Hex-(Hex-HexNAc-(HexNAc-)Hex-)Hex-HexNAc-HexNAc+Hex
					2628	2621	759.004	759.004	3	2273.99	29.91	724.296	-	-	No	0	1	108.04	0	0	FALSE	-	2-3-1-0-0		Hex-(Hex-)Hex-HexNAc-(DeHex-)HexNAc+Hex
					2630	2621	741.856	741.856	2	1481.7	29.92	523.002	-	-	No	0	1	108.12	0	0	FALSE	-	2-3-0-0-0		Hex-(Hex-)Hex-HexNAc-HexNAc+Hex
					2633	2632	724.715	724.382	3	2170.12	29.94	531.72	-	-	No	0	1	102.67	0	0	FALSE	-	2-3-1-0-0		Hex-(Hex-)Hex-HexNAc-(DeHex-)HexNAc+Hex	Hex-(Hex-)Hex-HexNAc-HexNAc+Hex
					2635	2632	1082.49	1082.24	4	4324.91	29.95	1047.63	-	-	No	0	1	154.08	0	0	FALSE	-	2-3-0-0-0		Hex-(Hex-)Hex-HexNAc-HexNAc+Hex	Hex-(Hex-)Hex-HexNAc-(DeHex-)HexNAc+Hex
					2637	2632	768.361	767.86	4	3067.41	29.96	715.648	-	-	No	0	1	123.47	0	0	FALSE	-	2-3-0-0-0		Hex-(Hex-)Hex-HexNAc-HexNAc+Hex	Hex-(Hex-)Hex-HexNAc-(DeHex-)HexNAc+Hex
					2639	2632	903.76	903.431	3	2707.27	29.98	430.209	-	-	No	0	0.99	2.6	115.08	-1	TRUE	-	4-5-0-0-0	0-1-0-0-0	HexNAc-Hex-(Hex-(HexNAc-)Hex-)Hex-HexNAc-HexNAc+HexNAc1	HexNAc-(HexNAc-)Hex-(Hex-Hex-)Hex-HexNAc-HexNAc+HexNAc1	Hex-HexNAc-Hex-(HexNAc-Hex-)Hex-HexNAc-HexNAc+HexNAc1	HexNAc-Hex-HexNAc-Hex-(Hex-)Hex-HexNAc-HexNAc+HexNAc1	Hex-HexNAc-(HexNAc-)Hex-(Hex-)Hex-HexNAc-HexNAc+HexNAc1	HexNAc-(Hex-)Hex-(HexNAc-Hex-)Hex-HexNAc-HexNAc+HexNAc1
					2641	2632	1115.19	1114.85	3	3341.52	29.99	957.658	-	-	No	0	1	108.31	0	0	FALSE	-	2-3-0-0-0		Hex-(Hex-)Hex-HexNAc-HexNAc+Hex	Hex-(Hex-)Hex-HexNAc-(DeHex-)HexNAc+Hex
					2644	2643	749.352	749.018	3	2244.03	30.01	520.781	-	-	No	0	1	104.5	0	0	FALSE	-	2-3-0-0-0		Hex-(Hex-)Hex-HexNAc-HexNAc+Hex	Hex-(Hex-)Hex-HexNAc-(DeHex-)HexNAc+Hex
					2646	2643	880.944	880.543	5	4397.68	30.02	1095.14	-	-	No	0	1	144.12	0	0	FALSE	-	2-3-1-0-0		Hex-(Hex-)Hex-HexNAc-(DeHex-)HexNAc+Hex	Hex-(Hex-)Hex-HexNAc-HexNAc+Hex
					2648	2643	852.362	851.859	2	1701.7	30.03	799.836	-	-	No	0	1	112.18	0	0	FALSE	-	2-3-0-0-0		Hex-(Hex-)Hex-HexNAc-HexNAc+Hex
					2650	2643	1215.25	1215.25	3	3642.73	30.04	1619.26	-	-	No	0	1	198.92	0	0	FALSE	-	2-3-0-0-0		Hex-(Hex-)Hex-HexNAc-HexNAc+Hex
					2652	2643	1002.47	1001.97	2	2001.92	30.06	761.581	-	-	No	0	1	103.34	0	0	FALSE	-	2-3-0-0-0		Hex-(Hex-)Hex-HexNAc-HexNAc+Hex
					2655	2654	652.577	652.331	4	2605.3	30.08	556.927	-	-	No	0	1	118.09	0	0	FALSE	-	2-3-1-0-0		Hex-(Hex-)Hex-HexNAc-(DeHex-)HexNAc+Hex	Hex-(Hex-)Hex-HexNAc-HexNAc+Hex
					2657	2654	862.926	862.427	2	1722.84	30.09	793.59	-	-	No	0	1	42.69	0	0	FALSE	-	2-3-0-0-0		Hex-(Hex-)Hex-HexNAc-HexNAc+Hex
					2659	2654	678.311	678.063	4	2708.22	30.1	453.252	-	-	No	0	1	106.04	6.05	0	FALSE	-	2-4-0-0-0		Hex-Hex-(Hex-)Hex-HexNAc-HexNAc+Hex	Hex-(Hex-Hex-)Hex-HexNAc-HexNAc+Hex
					2661	2654	1100.93	1100.68	4	4398.68	30.12	843.566	-	-	No	0	1	61.3	128.94	0	FALSE	-	3-7-2-0-0		DeHex-HexNAc-Hex-Hex-Hex-(Hex-(Hex-)Hex-)Hex-HexNAc-(DeHex-)HexNAc+Hex	DeHex-HexNAc-Hex-Hex-(Hex-)Hex-(Hex-Hex-)Hex-HexNAc-(DeHex-)HexNAc+Hex	DeHex-HexNAc-Hex-Hex-Hex-(Hex-Hex-Hex-)Hex-HexNAc-(DeHex-)HexNAc+Hex	Hex-Hex-Hex-(Hex-)Hex-(DeHex-HexNAc-Hex-)Hex-HexNAc-(DeHex-)HexNAc+Hex	Hex-Hex-(Hex-Hex-)Hex-(DeHex-HexNAc-Hex-)Hex-HexNAc-(DeHex-)HexNAc+Hex	Hex-Hex-(Hex-)Hex-(DeHex-HexNAc-(Hex-)Hex-)Hex-HexNAc-(DeHex-)HexNAc+Hex	DeHex-HexNAc-Hex-Hex-(Hex-Hex-)Hex-(Hex-)Hex-HexNAc-(DeHex-)HexNAc+Hex	DeHex-HexNAc-(Hex-)Hex-(Hex-Hex-Hex-Hex-)Hex-HexNAc-(DeHex-)HexNAc+Hex	Hex-Hex-Hex-Hex-Hex-(DeHex-HexNAc-Hex-)Hex-HexNAc-(DeHex-)HexNAc+Hex	Hex-Hex-Hex-Hex-(DeHex-HexNAc-(Hex-)Hex-)Hex-HexNAc-(DeHex-)HexNAc+Hex	DeHex-HexNAc-(Hex-Hex-)Hex-(Hex-Hex-Hex-)Hex-HexNAc-(DeHex-)HexNAc+Hex	DeHex-HexNAc-(Hex-)Hex-(Hex-Hex-(Hex-)Hex-)Hex-HexNAc-(DeHex-)HexNAc+Hex
					2663	2654	825.377	825.377	4	3297.48	30.13	590.263	-	-	No	0	1	110.32	2.61	0	FALSE	-	3-5-1-0-0		HexNAc-Hex-(Hex-Hex-Hex-)Hex-HexNAc-(DeHex-)HexNAc+Hex	HexNAc-Hex-(Hex-(Hex-)Hex-)Hex-HexNAc-(DeHex-)HexNAc+Hex	Hex-HexNAc-Hex-(Hex-Hex-)Hex-HexNAc-(DeHex-)HexNAc+Hex	HexNAc-(Hex-)Hex-(Hex-Hex-)Hex-HexNAc-(DeHex-)HexNAc+Hex	HexNAc-(Hex-Hex-)Hex-(Hex-)Hex-HexNAc-(DeHex-)HexNAc+Hex	Hex-HexNAc-(Hex-)Hex-(Hex-)Hex-HexNAc-(DeHex-)HexNAc+Hex
					2668	2665	1553.65	1553.65	2	3105.28	30.16	1241.77	-	-	No	0	1	115.43	0	0	FALSE	-	2-3-0-0-0		Hex-(Hex-)Hex-HexNAc-HexNAc+Hex
					2670	2665	857.773	857.442	3	2569.3	30.17	616.11	-	-	No	0	1	156.44	0	0	FALSE	-	2-3-1-0-0		Hex-(Hex-)Hex-HexNAc-(DeHex-)HexNAc+Hex	Hex-(Hex-)Hex-HexNAc-HexNAc+Hex
					2672	2665	650.626	650.626	3	1948.86	30.18	615.357	-	-	No	0	1	125.67	0	0	FALSE	-	2-3-0-0-0		Hex-(Hex-)Hex-HexNAc-HexNAc+Hex
					2677	2676	660.061	659.808	4	2635.2	30.21	466.579	-	-	No	0	1	1.72	100.3	0	FALSE	-	3-4-1-0-0		Hex-HexNAc-Hex-(Hex-)Hex-HexNAc-(DeHex-)HexNAc+Hex	HexNAc-Hex-(Hex-Hex-)Hex-HexNAc-(DeHex-)HexNAc+Hex	HexNAc-(Hex-)Hex-(Hex-)Hex-HexNAc-(DeHex-)HexNAc+Hex
					2679	2676	1124.99	1124.48	4	4493.9	30.23	991.458	-	-	No	0	1	9.39	155.23	0	FALSE	-	2-6-1-0-0		Hex-Hex-(Hex-Hex-Hex-)Hex-HexNAc-(DeHex-)HexNAc+Hex	Hex-Hex-Hex-(Hex-Hex-)Hex-HexNAc-(DeHex-)HexNAc+Hex	Hex-Hex-Hex-Hex-(Hex-)Hex-HexNAc-(DeHex-)HexNAc+Hex
					2681	2676	940.903	940.403	2	1878.79	30.24	643.322	-	-	No	0	1	103.9	0	0	FALSE	-	2-3-0-0-0		Hex-(Hex-)Hex-HexNAc-HexNAc+Hex
					2683	2676	956.428	956.428	2	1910.84	30.25	882.579	-	-	No	0	1	103	0	0	FALSE	-	2-3-0-0-0		Hex-(Hex-)Hex-HexNAc-HexNAc+Hex	Hex-(Hex-)Hex-HexNAc-(DeHex-)HexNAc+Hex
					2690	2687	1181.83	1181.16	3	3540.46	30.3	964.531	-	-	No	0	1	126.2	0	0	FALSE	-	2-3-0-0-0		Hex-(Hex-)Hex-HexNAc-HexNAc+Hex
					2692	2687	1036.43	1036.09	3	3105.26	30.31	723.097	-	-	No	0	1	255.88	265.25	-1	TRUE	-	2-9-0-0-0	0-1-0-0-0	Hex-Hex-Hex-Hex-Hex-Hex-(Hex-)Hex-HexNAc-HexNAc+HexNAc1	Hex-Hex-Hex-Hex-Hex-(Hex-Hex-)Hex-HexNAc-HexNAc+HexNAc1	Hex-Hex-Hex-Hex-(Hex-Hex-Hex-)Hex-HexNAc-HexNAc+HexNAc1	Hex-Hex-Hex-(Hex-Hex-Hex-Hex-)Hex-HexNAc-HexNAc+HexNAc1
					2694	2687	1473.12	1472.61	2	2943.2	30.32	1241.63	-	-	No	0	1	114.42	0	0	FALSE	-	2-3-0-0-0		Hex-(Hex-)Hex-HexNAc-HexNAc+Hex
					2696	2687	1169.25	1169.25	4	4672.95	30.33	977.367	-	-	No	0	0.96	18.62	111.74	0	FALSE	-	4-7-0-0-0	1-0-0-0-0	HexNAc-(Hex-Hex-)Hex-(Hex-Hex-Hex-)Hex-HexNAc-HexNAc+Hex1	HexNAc-(Hex-)Hex-(Hex-(Hex-Hex-)Hex-)Hex-HexNAc-HexNAc+Hex1	Hex-HexNAc-Hex-(Hex-(Hex-Hex-)Hex-)Hex-HexNAc-HexNAc+Hex1	Hex-Hex-Hex-(Hex-)Hex-(HexNAc-Hex-)Hex-HexNAc-HexNAc+Hex1	Hex-HexNAc-Hex-(Hex-Hex-(Hex-)Hex-)Hex-HexNAc-HexNAc+Hex1	HexNAc-(Hex-)Hex-(Hex-Hex-Hex-Hex-)Hex-HexNAc-HexNAc+Hex1	Hex-Hex-(Hex-Hex-)Hex-(HexNAc-Hex-)Hex-HexNAc-HexNAc+Hex1	Hex-Hex-(Hex-)Hex-(HexNAc-(Hex-)Hex-)Hex-HexNAc-HexNAc+Hex1	Hex-Hex-(Hex-)Hex-(Hex-HexNAc-Hex-)Hex-HexNAc-HexNAc+Hex1	Hex-(Hex-Hex-)Hex-(HexNAc-(Hex-)Hex-)Hex-HexNAc-HexNAc+Hex1	Hex-(Hex-)Hex-(Hex-HexNAc-(Hex-)Hex-)Hex-HexNAc-HexNAc+Hex1	Hex-(Hex-)Hex-(HexNAc-(Hex-Hex-)Hex-)Hex-HexNAc-HexNAc+Hex1	Hex-(Hex-Hex-)Hex-(Hex-HexNAc-Hex-)Hex-HexNAc-HexNAc+Hex1	Hex-Hex-Hex-Hex-Hex-(HexNAc-Hex-)Hex-HexNAc-HexNAc+Hex1	Hex-HexNAc-Hex-(Hex-Hex-Hex-Hex-)Hex-HexNAc-HexNAc+Hex1	Hex-Hex-Hex-Hex-(Hex-HexNAc-Hex-)Hex-HexNAc-HexNAc+Hex1	Hex-Hex-Hex-Hex-(HexNAc-(Hex-)Hex-)Hex-HexNAc-HexNAc+Hex1	HexNAc-(Hex-Hex-)Hex-(Hex-(Hex-)Hex-)Hex-HexNAc-HexNAc+Hex1	Hex-Hex-(HexNAc-)Hex-(Hex-Hex-Hex-)Hex-HexNAc-HexNAc+Hex1	Hex-Hex-(Hex-HexNAc-)Hex-(Hex-Hex-)Hex-HexNAc-HexNAc+Hex1	Hex-Hex-Hex-(HexNAc-)Hex-(Hex-Hex-)Hex-HexNAc-HexNAc+Hex1	Hex-Hex-(HexNAc-)Hex-(Hex-(Hex-)Hex-)Hex-HexNAc-HexNAc+Hex1	Hex-HexNAc-(Hex-)Hex-(Hex-(Hex-)Hex-)Hex-HexNAc-HexNAc+Hex1	Hex-HexNAc-(Hex-Hex-)Hex-(Hex-Hex-)Hex-HexNAc-HexNAc+Hex1	Hex-Hex-Hex-(HexNAc-(Hex-Hex-)Hex-)Hex-HexNAc-HexNAc+Hex1
					2699	2698	791.841	791.841	2	1581.67	30.35	905.496	-	-	No	0	1	137.51	0	0	FALSE	-	2-3-1-0-0		Hex-(Hex-)Hex-HexNAc-(DeHex-)HexNAc+Hex	Hex-(Hex-)Hex-HexNAc-HexNAc+Hex
					2701	2698	795.875	795.875	2	1589.73	30.36	540.588	-	-	No	0	1	101.45	0	0	FALSE	-	2-3-0-0-0		Hex-(Hex-)Hex-HexNAc-HexNAc+Hex
					2703	2698	665.321	665.321	4	2657.26	30.38	630.855	-	-	No	0	1	103.71	0	0	FALSE	-	2-3-1-0-0		Hex-(Hex-)Hex-HexNAc-(DeHex-)HexNAc+Hex	Hex-(Hex-)Hex-HexNAc-HexNAc+Hex
					2705	2698	1208.77	1208.51	4	4830.01	30.39	1155.76	-	-	No	0	1	106.53	26.99	0	FALSE	-	2-6-0-0-0		Hex-Hex-(Hex-Hex-Hex-)Hex-HexNAc-HexNAc+Hex	Hex-Hex-Hex-(Hex-Hex-)Hex-HexNAc-HexNAc+Hex	Hex-Hex-Hex-Hex-(Hex-)Hex-HexNAc-HexNAc+Hex
					2707	2698	1128.99	1128.48	4	4509.89	30.4	847.638	-	-	No	0	1	22.93	231.6	0	FALSE	-	5-6-1-0-0		DeHex-HexNAc-Hex-HexNAc-Hex-(HexNAc-(Hex-Hex-)Hex-)Hex-HexNAc-HexNAc+Hex	DeHex-HexNAc-Hex-HexNAc-(HexNAc-)Hex-(Hex-Hex-Hex-)Hex-HexNAc-HexNAc+Hex	DeHex-HexNAc-Hex-HexNAc-(Hex-Hex-)Hex-(HexNAc-Hex-)Hex-HexNAc-HexNAc+Hex	DeHex-HexNAc-Hex-HexNAc-(Hex-HexNAc-)Hex-(Hex-Hex-)Hex-HexNAc-HexNAc+Hex	DeHex-HexNAc-Hex-HexNAc-(Hex-)Hex-(Hex-HexNAc-Hex-)Hex-HexNAc-HexNAc+Hex	DeHex-HexNAc-Hex-HexNAc-Hex-(Hex-HexNAc-(Hex-)Hex-)Hex-HexNAc-HexNAc+Hex	DeHex-HexNAc-Hex-HexNAc-(Hex-)Hex-(HexNAc-(Hex-)Hex-)Hex-HexNAc-HexNAc+Hex	DeHex-HexNAc-Hex-HexNAc-(HexNAc-)Hex-(Hex-(Hex-)Hex-)Hex-HexNAc-HexNAc+Hex
					2710	2709	700.27	700.27	4	2797.05	30.42	665.913	-	-	No	0	1	171.55	0	0	FALSE	-	2-3-0-0-0		Hex-(Hex-)Hex-HexNAc-HexNAc+Hex
					2712	2709	785.91	785.412	2	1568.81	30.44	733.718	-	-	No	0	1	101.01	0	0	FALSE	-	2-3-0-0-0		Hex-(Hex-)Hex-HexNAc-HexNAc+Hex
					2714	2709	702.838	702.838	2	1403.66	30.45	676.47	-	-	No	0	1	107.66	0	0	FALSE	-	2-3-0-0-0		Hex-(Hex-)Hex-HexNAc-HexNAc+Hex
					2716	2709	844.408	844.408	2	1686.8	30.47	792.23	-	-	No	0	1	101.12	0	0	FALSE	-	2-3-0-0-0		Hex-(Hex-)Hex-HexNAc-HexNAc+Hex
					2725	2720	694.323	693.822	2	1385.63	30.53	659.614	-	-	No	0	1	93.44	0	0	FALSE	-	2-3-0-0-0		Hex-(Hex-)Hex-HexNAc-HexNAc+Hex
					2727	2720	837.377	836.878	4	3343.48	30.54	744.365	-	-	No	0	1	106.35	1.31	0	FALSE	-	3-4-0-0-0		Hex-HexNAc-Hex-(Hex-)Hex-HexNAc-HexNAc+Hex	HexNAc-(Hex-)Hex-(Hex-)Hex-HexNAc-HexNAc+Hex	HexNAc-Hex-(Hex-Hex-)Hex-HexNAc-HexNAc+Hex
					2729	2720	913.412	913.412	2	1824.81	30.55	714.341	-	-	No	0	1	138.16	0	0	FALSE	-	2-3-1-0-0		Hex-(Hex-)Hex-HexNAc-(DeHex-)HexNAc+Hex	Hex-(Hex-)Hex-HexNAc-HexNAc+Hex
					2734	2731	980.398	979.901	2	1957.79	30.59	829.727	-	-	No	0	1	102.84	0	0	FALSE	-	2-3-0-0-0		Hex-(Hex-)Hex-HexNAc-HexNAc+Hex
					2736	2731	965.741	965.069	3	2892.18	30.6	700.305	-	-	No	0	1	100.46	0	0	FALSE	-	2-3-0-0-0		Hex-(Hex-)Hex-HexNAc-HexNAc+Hex	Hex-(Hex-)Hex-HexNAc-(DeHex-)HexNAc+Hex
					2738	2731	1074.22	1073.71	4	4290.82	30.61	909.43	-	-	No	1	0.73	18.8	191.7	-1	TRUE	-	4-5-1-0-0	1-0-0-0-0	Hex-(Hex-)Hex-(DeHex-HexNAc-Hex-)Hex-HexNAc-HexNAc+Hex1	Hex-Hex-Hex-(DeHex-HexNAc-Hex-)Hex-HexNAc-HexNAc+Hex1
					2740	2731	776.387	775.888	2	1549.76	30.63	740.759	-	-	No	0	1	108.09	0	0	FALSE	-	2-3-0-0-0		Hex-(Hex-)Hex-HexNAc-HexNAc+Hex
					2743	2742	764.089	763.836	4	3051.32	30.65	561.789	-	-	No	0	1	103.54	15.79	0	FALSE	-	4-4-0-0-0		HexNAc-Hex-(HexNAc-(Hex-)Hex-)Hex-HexNAc-HexNAc+Hex	HexNAc-(Hex-)Hex-(HexNAc-Hex-)Hex-HexNAc-HexNAc+Hex	Hex-HexNAc-Hex-(HexNAc-Hex-)Hex-HexNAc-HexNAc+Hex	HexNAc-Hex-(Hex-HexNAc-Hex-)Hex-HexNAc-HexNAc+Hex	Hex-HexNAc-(HexNAc-)Hex-(Hex-)Hex-HexNAc-HexNAc+Hex	HexNAc-(Hex-HexNAc-)Hex-(Hex-)Hex-HexNAc-HexNAc+Hex	HexNAc-(HexNAc-)Hex-(Hex-Hex-)Hex-HexNAc-HexNAc+Hex
					2745	2742	715.348	715.096	4	2856.36	30.66	567.799	-	-	No	0	1	102.51	0	0	FALSE	-	2-3-1-0-0		Hex-(Hex-)Hex-HexNAc-(DeHex-)HexNAc+Hex	Hex-(Hex-)Hex-HexNAc-HexNAc+Hex
					2747	2742	689.091	688.841	4	2751.33	30.67	586.246	-	-	No	0	1	176.51	0	0	FALSE	-	2-3-1-0-0		Hex-(Hex-)Hex-HexNAc-(DeHex-)HexNAc+Hex
					2749	2742	691.362	691.362	3	2071.07	30.69	481.482	-	-	No	0	1	140.71	0	0	FALSE	-	2-3-0-0-0		Hex-(Hex-)Hex-HexNAc-HexNAc+Hex
					2751	2742	1432.29	1432.29	3	4293.86	30.7	670.836	-	-	No	0	1	1.58	264.22	0	FALSE	-	6-7-3-0-0		DeHex-HexNAc-Hex-Hex-(HexNAc-)Hex-(Hex-HexNAc-(Hex-(DeHex-)HexNAc-)Hex-)Hex-HexNAc-(DeHex-)HexNAc+Hex	DeHex-HexNAc-Hex-Hex-Hex-Hex-(HexNAc-)Hex-(HexNAc-(DeHex-HexNAc-)Hex-)Hex-HexNAc-(DeHex-)HexNAc+Hex	DeHex-HexNAc-Hex-HexNAc-(HexNAc-)Hex-(Hex-Hex-(Hex-(DeHex-)HexNAc-)Hex-)Hex-HexNAc-(DeHex-)HexNAc+Hex	DeHex-HexNAc-Hex-HexNAc-(Hex-Hex-Hex-)Hex-(HexNAc-(DeHex-HexNAc-)Hex-)Hex-HexNAc-(DeHex-)HexNAc+Hex	DeHex-HexNAc-Hex-HexNAc-(Hex-(DeHex-)HexNAc-)Hex-(Hex-HexNAc-(Hex-)Hex-)Hex-HexNAc-(DeHex-)HexNAc+Hex	DeHex-HexNAc-Hex-HexNAc-(Hex-)Hex-(Hex-HexNAc-(Hex-(DeHex-)HexNAc-)Hex-)Hex-HexNAc-(DeHex-)HexNAc+Hex
					2754	2753	669.709	669.381	3	2005.12	30.72	402.94	-	-	No	0	1	114.3	0	0	FALSE	-	2-3-1-0-0		Hex-(Hex-)Hex-HexNAc-(DeHex-)HexNAc+Hex
					2756	2753	815.928	815.928	2	1629.84	30.73	780.894	-	-	No	0	1	89.67	0	0	FALSE	-	2-3-0-0-0		Hex-(Hex-)Hex-HexNAc-HexNAc+Hex
					2758	2753	756.857	756.605	4	3022.39	30.74	637	-	-	No	0	1	111.06	4.01	0	FALSE	-	3-4-0-0-0		HexNAc-(Hex-)Hex-(Hex-)Hex-HexNAc-HexNAc+Hex	Hex-HexNAc-Hex-(Hex-)Hex-HexNAc-HexNAc+Hex	HexNAc-Hex-(Hex-Hex-)Hex-HexNAc-HexNAc+Hex
					2762	2753	1007.96	1007.46	2	2012.9	30.76	989.818	-	-	No	0	1	90.05	0	0	FALSE	-	2-3-1-0-0		Hex-(Hex-)Hex-HexNAc-(DeHex-)HexNAc+Hex
					2765	2764	900.407	900.077	3	2697.21	30.79	932.294	-	-	No	1	0.53	194.42	0	0	FALSE	-	2-3-1-0-0		Hex-(Hex-)Hex-HexNAc-(DeHex-)HexNAc+Hex
					2767	2764	871.428	871.428	2	1740.84	30.8	558.771	-	-	No	0	1	68.58	0	0	FALSE	-	2-3-0-0-0		Hex-(Hex-)Hex-HexNAc-HexNAc+Hex
					2769	2764	718.031	717.364	3	2149.07	30.81	622.301	-	-	No	0	1	132.2	0	0	FALSE	-	2-3-0-0-0		Hex-(Hex-)Hex-HexNAc-HexNAc+Hex
					2771	2764	1338.91	1338.57	3	4012.68	30.83	670.836	-	-	No	0	1	39.55	173.28	0	FALSE	-	4-6-3-1-1		NeuGc-Hex-(DeHex-)HexNAc-Hex-(NeuAc-Hex-(DeHex-)HexNAc-(Hex-)Hex-)Hex-HexNAc-(DeHex-)HexNAc+Hex	NeuAc-Hex-(DeHex-)HexNAc-(Hex-)Hex-(NeuGc-Hex-(DeHex-)HexNAc-Hex-)Hex-HexNAc-(DeHex-)HexNAc+Hex	NeuGc-Hex-(DeHex-)HexNAc-(Hex-)Hex-(NeuAc-Hex-(DeHex-)HexNAc-Hex-)Hex-HexNAc-(DeHex-)HexNAc+Hex	NeuAc-Hex-(DeHex-)HexNAc-Hex-(NeuGc-Hex-(DeHex-)HexNAc-(Hex-)Hex-)Hex-HexNAc-(DeHex-)HexNAc+Hex	NeuGc-Hex-(DeHex-)HexNAc-(NeuAc-Hex-(DeHex-)HexNAc-)Hex-(Hex-Hex-)Hex-HexNAc-(DeHex-)HexNAc+Hex	NeuAc-Hex-(DeHex-)HexNAc-(NeuGc-Hex-(DeHex-)HexNAc-)Hex-(Hex-Hex-)Hex-HexNAc-(DeHex-)HexNAc+Hex
					2776	2775	705.323	705.123	5	3520.58	30.86	514.921	-	-	No	0	1	3.43	100	0	FALSE	-	2-4-0-0-0		Hex-Hex-(Hex-)Hex-HexNAc-HexNAc+Hex	Hex-(Hex-Hex-)Hex-HexNAc-HexNAc+Hex
					2778	2775	731.981	731.647	3	2191.92	30.87	578.016	-	-	No	0	1	148.22	0	-2	TRUE	-	3-3-1-0-0	1-0-1-0-0	Hex-(Hex-)Hex-HexNAc-HexNAc+Hex1DeHex1
					2784	2775	754.849	754.849	2	1507.68	30.91	706.206	-	-	No	0	1	103.1	0	0	FALSE	-	2-3-0-0-0		Hex-(Hex-)Hex-HexNAc-HexNAc+Hex
					2787	2786	683.855	683.349	2	1364.68	30.93	675.28	-	-	No	0	1	111.48	0	0	FALSE	-	2-3-0-0-0		Hex-(Hex-)Hex-HexNAc-HexNAc+Hex
					2789	2786	743.398	743.398	2	1484.78	30.94	430.209	-	-	No	0	1	135.63	0	0	FALSE	-	2-3-0-0-0		Hex-(Hex-)Hex-HexNAc-HexNAc+Hex
					2793	2786	658.279	657.78	4	2627.09	30.96	474.243	-	-	No	0	1	110.06	0	0	FALSE	-	2-3-1-0-0		Hex-(Hex-)Hex-HexNAc-(DeHex-)HexNAc+Hex	Hex-(Hex-)Hex-HexNAc-HexNAc+Hex
[truncated: 3,703 more rows]
[truncated: 109 more columns]

## Sheet: Random criteria
manually	Match with precursor				126
[truncated: 2 more rows]

[truncated: 1 more sheets: Verified Set]
